# Supplementary material for: N,N-bis(2-quinolinylmethyl)benzylamine
Source: Preprints.org preprint supplement (doi:10.20944/preprints202103.0604.v1), 2021-03-24

# checkCIF/PLATON report

Structure factors have been supplied for datablock(s) am\_sn\_11

THIS REPORT IS FOR GUIDANCE ONLY. IF USED AS PART OF A REVIEW PROCEDURE FOR PUBLICATION, IT SHOULD NOT REPLACE THE EXPERTISE OF AN EXPERIENCED CRYSTALLOGRAPHIC REFEREE.

No syntax errors found.      CIF dictionary      Interpreting this report

## Datablock: am\_sn\_11

---

|                 |                        |                                     |
|-----------------|------------------------|-------------------------------------|
| Bond precision: | C-C = 0.0021 A         | Wavelength=0.71073                  |
| Cell:           | a=8.7296(6)            | b=11.1447(6)      c=12.3411(6)      |
|                 | alpha=70.914(2)        | beta=86.955(2)      gamma=74.653(2) |
| Temperature:    | 100 K                  |                                     |
|                 | Calculated             | Reported                            |
| Volume          | 1093.45(11)            | 1093.45(11)                         |
| Space group     | P -1                   | P -1                                |
| Hall group      | -P 1                   | -P 1                                |
| Moiety formula  | C27 H23 N3 [+ solvent] | C27 H23 N3, 0.5[C2H6O]              |
| Sum formula     | C27 H23 N3 [+ solvent] | C28 H26 N3 O0.5                     |
| Mr              | 389.48                 | 412.54                              |
| Dx,g cm-3       | 1.183                  | 1.253                               |
| Z               | 2                      | 2                                   |
| Mu (mm-1)       | 0.070                  | 0.076                               |
| F000            | 412.0                  | 438.2                               |
| F000'           | 412.14                 |                                     |
| h,k,lmax        | 10,13,15               | 10,13,15                            |
| Nref            | 4304                   | 4234                                |
| Tmin,Tmax       | 0.985,0.992            | 0.695,0.745                         |
| Tmin'           | 0.972                  |                                     |

Correction method= # Reported T Limits: Tmin=0.695 Tmax=0.745  
AbsCorr = MULTI-SCAN

Data completeness= 0.984      Theta(max)= 26.010

R(reflections)= 0.0442( 3857)      wR2(reflections)= 0.1088( 4234)

S = 1.066      Npar= 271

---

The following ALERTS were generated. Each ALERT has the format  
**test-name\_ALERT\_alert-type\_alert-level.**  
Click on the hyperlinks for more details of the test.

---

**Alert level C**

PLAT906\_ALERT\_3\_C Large K Value in the Analysis of Variance ..... 2.137 Check  
PLAT911\_ALERT\_3\_C Missing FCF Refl Between Thmin & STh/L= 0.600 50 Report

---

**Alert level G**

FORMU01\_ALERT\_2\_G There is a discrepancy between the atom counts in the  
\_chemical\_formula\_sum and the formula from the \_atom\_site\* data.  
Atom count from \_chemical\_formula\_sum: C28 H26 N3 O0.5  
Atom count from the \_atom\_site data: C27 H23 N3  
CELLZ01\_ALERT\_1\_G Difference between formula and atom\_site contents detected.  
CELLZ01\_ALERT\_1\_G ALERT: Large difference may be due to a  
symmetry error - see SYMMG tests  
From the CIF: \_cell\_formula\_units\_Z 2  
From the CIF: \_chemical\_formula\_sum C28 H26 N3 O0.5  
TEST: Compare cell contents of formula and atom\_site data

| atom | Z*formula | cif sites | diff |
|------|-----------|-----------|------|
| C    | 56.00     | 54.00     | 2.00 |
| H    | 52.00     | 46.00     | 6.00 |
| N    | 6.00      | 6.00      | 0.00 |
| O    | 1.00      | 0.00      | 1.00 |

|                                                                    |                |              |
|--------------------------------------------------------------------|----------------|--------------|
| PLAT041_ALERT_1_G Calc. and Reported SumFormula                    | Strings Differ | Please Check |
| PLAT068_ALERT_1_G Reported F000 Differs from Calcd (or Missing)... |                | Please Check |
| PLAT073_ALERT_1_G H-atoms ref, but _hydrogen_treatment Reported as |                | constr Check |
| PLAT154_ALERT_1_G The s.u.'s on the Cell Angles are Equal..(Note)  |                | 0.002 Degree |
| PLAT605_ALERT_4_G Largest Solvent Accessible VOID in the Structure |                | 101 A**3     |
| PLAT650_ALERT_4_G SWAT Instruction Used to Model Solvent Disorder  |                | ! Report     |
| PLAT769_ALERT_4_G CIF Embedded explicitly supplied scattering data |                | Please Note  |
| PLAT802_ALERT_4_G CIF Input Record(s) with more than 80 Characters |                | 2 Info       |
| PLAT912_ALERT_4_G Missing # of FCF Reflections Above STh/L= 0.600  |                | 20 Note      |
| PLAT960_ALERT_3_G Number of Intensities with I < - 2*sig(I) ...    |                | 2 Check      |
| PLAT978_ALERT_2_G Number C-C Bonds with Positive Residual Density. |                | 8 Info       |

---

0 **ALERT level A** = Most likely a serious problem - resolve or explain  
0 **ALERT level B** = A potentially serious problem, consider carefully  
2 **ALERT level C** = Check. Ensure it is not caused by an omission or oversight  
14 **ALERT level G** = General information/check it is not something unexpected

6 ALERT type 1 CIF construction/syntax error, inconsistent or missing data  
2 ALERT type 2 Indicator that the structure model may be wrong or deficient  
3 ALERT type 3 Indicator that the structure quality may be low  
5 ALERT type 4 Improvement, methodology, query or suggestion  
0 ALERT type 5 Informative message, check

---

---

It is advisable to attempt to resolve as many as possible of the alerts in all categories. Often the minor alerts point to easily fixed oversights, errors and omissions in your CIF or refinement strategy, so attention to these fine details can be worthwhile. In order to resolve some of the more serious problems it may be necessary to carry out additional measurements or structure refinements. However, the purpose of your study may justify the reported deviations and the more serious of these should normally be commented upon in the discussion or experimental section of a paper or in the "special\_details" fields of the CIF. checkCIF was carefully designed to identify outliers and unusual parameters, but every test has its limitations and alerts that are not important in a particular case may appear. Conversely, the absence of alerts does not guarantee there are no aspects of the results needing attention. It is up to the individual to critically assess their own results and, if necessary, seek expert advice.

### **Publication of your CIF in IUCr journals**

A basic structural check has been run on your CIF. These basic checks will be run on all CIFs submitted for publication in IUCr journals (*Acta Crystallographica*, *Journal of Applied Crystallography*, *Journal of Synchrotron Radiation*); however, if you intend to submit to *Acta Crystallographica Section C* or *E* or *IUCrData*, you should make sure that full publication checks are run on the final version of your CIF prior to submission.

### **Publication of your CIF in other journals**

Please refer to the *Notes for Authors* of the relevant journal for any special instructions relating to CIF submission.

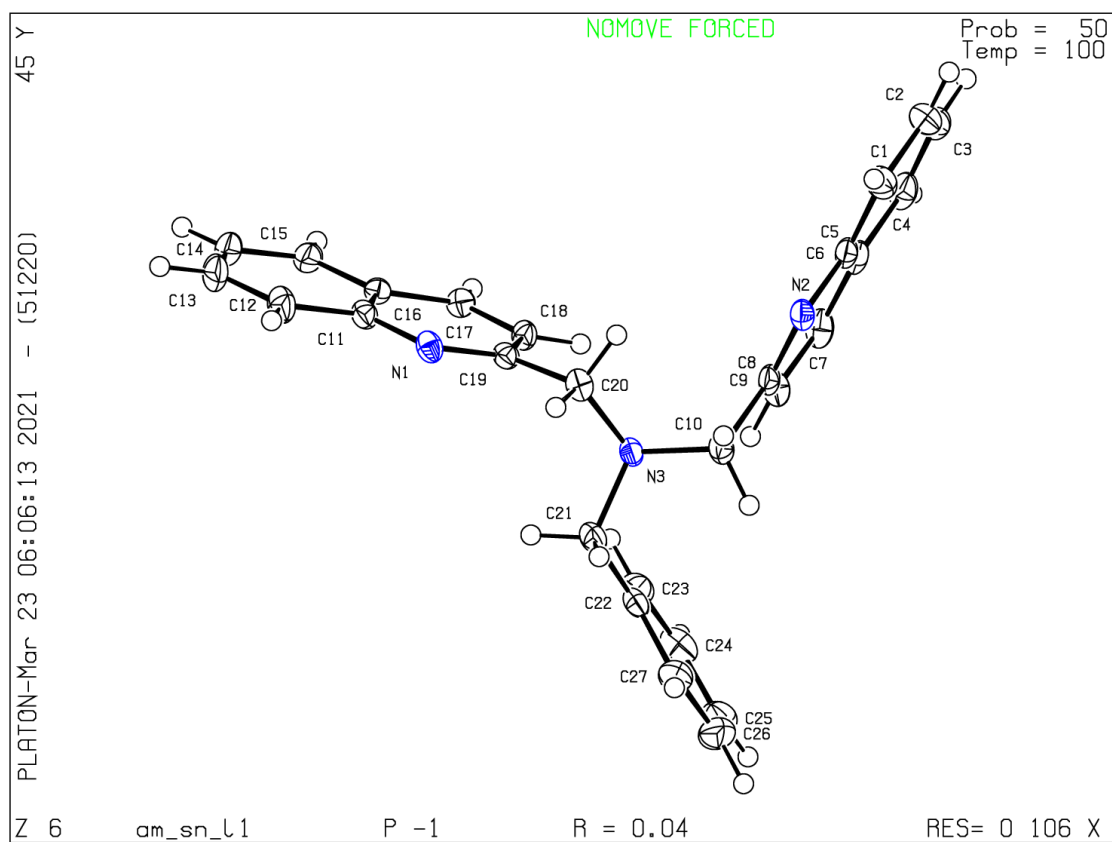

Supplement: Supplementary file 1 [file supplementary › am_sn_l1_cifreport.pdf]
