# Supplementary material for: N,N-bis(2-quinolinylmethyl)benzylamine
Source: Preprints.org preprint supplement (doi:10.20944/preprints202103.0604.v1), 2021-03-24
Supplement: Supplementary file 1 [file ESI_ Fig Tables Molbank.docx]

Article

**N,N-bis(2-quinolinylmethyl)benzylamine.**

Leigh A. Hunter 1, Shivani Naidoo1 and Allen Mambanda1,*

|  |
| --- |

1School of Chemistry and Physics, University of KwaZulu-Natal, Private Bag X01, Scottsville, Pietermaritzburg, 3209, South Africa.;

HunterL@ukzn.ac.za; "shivanin.21@gmail.com; mambanda@ukzn.ac.za

*Correspondence: [mambanda@ukzn.ac.za](mailto:mambanda@ukzn.ac.za); <https://orcid.org/0000-0002-8113-3643>


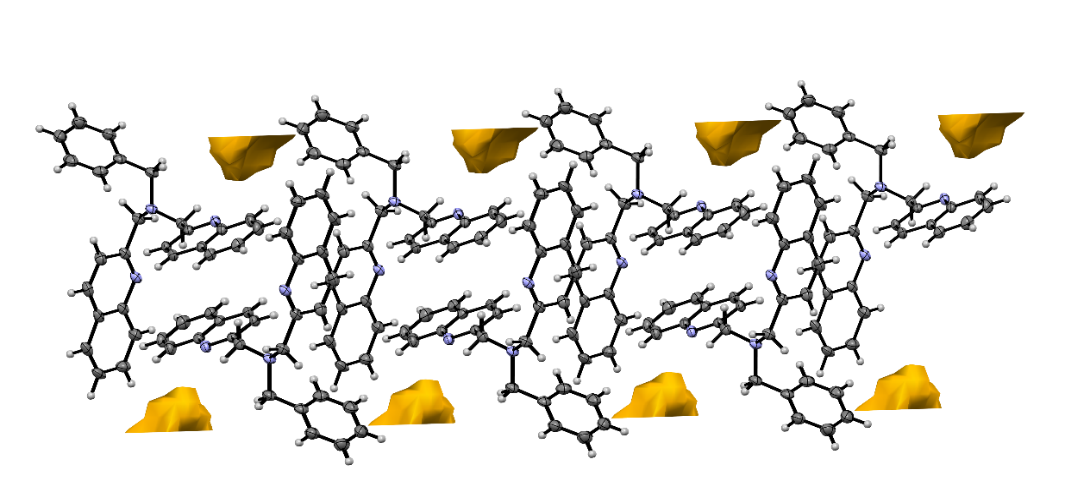
**Supplementary data**

Fig S1 1. The linear chains of the dimers of **1**, showing the exogenous voids that can include solvent molecules.


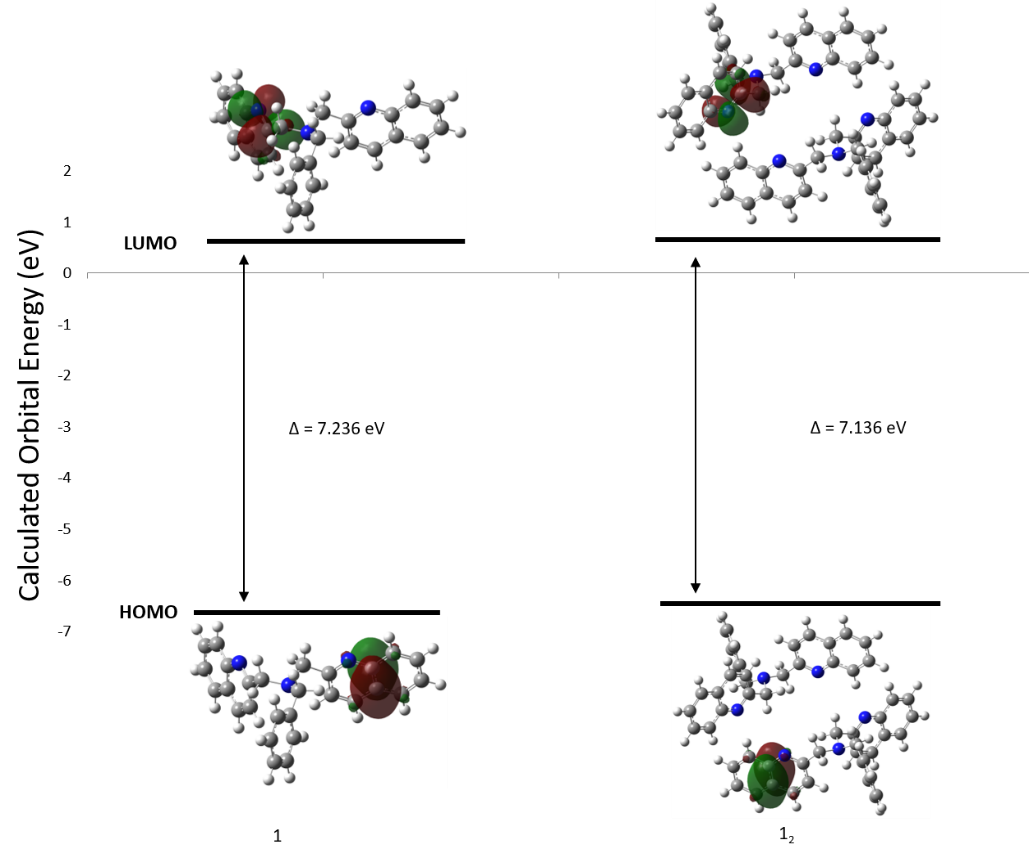


Fig. SI 2. The DFT HOMO-LUMO energy-band diagram for **1**.

Table SI 1. Atomic coordinates ( x 104) and equivalent isotropic displacement parameters (Å2x 103)

for l1_sq (**1**). U(eq) is defined as one-third of the trace of the orthogonalized Uij tensor.

________________________________________________________________________________

x y z U(eq)

________________________________________________________________________________

N(1) 1275(1) 5529(1) 2873(1) 21(1)

C(1) 5772(2) 7548(2) 6655(1) 28(1)

N(2) 4883(1) 8183(1) 4699(1) 20(1)

C(2) 5579(2) 7672(2) 7727(1) 33(1)

N(3) 2765(1) 8324(1) 2385(1) 21(1)

C(3) 4251(2) 8590(2) 7944(1) 33(1)

C(4) 3148(2) 9377(2) 7093(1) 29(1)

C(5) 3304(2) 9272(1) 5977(1) 23(1)

C(6) 4643(2) 8346(1) 5760(1) 21(1)

C(7) 2188(2) 10034(1) 5057(1) 26(1)

C(8) 2434(2) 9860(1) 4018(1) 26(1)

C(9) 3820(2) 8918(1) 3870(1) 20(1)

C(10) 4073(2) 8760(1) 2701(1) 23(1)

C(11) -110(2) 5147(1) 3159(1) 21(1)

C(12) -313(2) 4070(1) 2866(1) 29(1)

C(13) -1676(2) 3661(2) 3138(1) 33(1)

C(14) -2896(2) 4302(2) 3707(1) 31(1)

C(15) -2730(2) 5345(1) 3998(1) 25(1)

C(16) -1342(2) 5794(1) 3726(1) 20(1)

C(17) -1126(2) 6885(1) 3987(1) 20(1)

C(18) 247(2) 7254(1) 3697(1) 20(1)

C(19) 1431(2) 6539(1) 3146(1) 19(1)

C(20) 2994(2) 6905(1) 2918(1) 22(1)

C(21) 2472(2) 8748(1) 1140(1) 26(1)

C(22) 1885(2) 10225(1) 643(1) 25(1)

C(23) 514(2) 10884(2) 1056(1) 30(1)

C(24) -26(2) 12241(2) 646(1) 34(1)

C(25) 795(2) 12970(2) -192(1) 38(1)

C(26) 2142(2) 12330(2) -620(1) 39(1)

C(27) 2684(2) 10967(2) -206(1) 32(1)

________________________________________________________________________________Table SI 2. Bond lengths [Å] and angles [°] for l1_sq (**1**).

_____________________________________________________

N(1)-C(19) 1.3165(16)

N(1)-C(11) 1.3772(17)

C(1)-C(2) 1.371(2)

C(1)-C(6) 1.411(2)

C(1)-H(1) 0.9500

N(2)-C(9) 1.3151(17)

N(2)-C(6) 1.3768(16)

C(2)-C(3) 1.408(2)

C(2)-H(2) 0.9500

N(3)-C(20) 1.4625(17)

N(3)-C(21) 1.4673(16)

N(3)-C(10) 1.4692(16)

C(3)-C(4) 1.363(2)

C(3)-H(3) 0.9500

C(4)-C(5) 1.4164(19)

C(4)-H(4) 0.9500

C(5)-C(7) 1.417(2)

C(5)-C(6) 1.4186(19)

C(7)-C(8) 1.356(2)

C(7)-H(7) 0.9500

C(8)-C(9) 1.4241(19)

C(8)-H(8) 0.9500

C(9)-C(10) 1.5082(17)

C(10)-H(10A) 0.9900

C(10)-H(10B) 0.9900

C(11)-C(12) 1.4156(18)

C(11)-C(16) 1.4166(19)

C(12)-C(13) 1.371(2)

C(12)-H(12) 0.9500

C(13)-C(14) 1.409(2)

C(13)-H(13) 0.9500

C(14)-C(15) 1.366(2)

C(14)-H(14) 0.9500

C(15)-C(16) 1.4138(19)

C(15)-H(15) 0.9500

C(16)-C(17) 1.4158(18)

C(17)-C(18) 1.3603(18)

C(17)-H(17) 0.9500

C(18)-C(19) 1.4171(18)

C(18)-H(18) 0.9500

C(19)-C(20) 1.5119(18)

C(20)-H(20A) 0.9900

C(20)-H(20B) 0.9900

C(21)-C(22) 1.508(2)

C(21)-H(21A) 0.9900

C(21)-H(21B) 0.9900

C(22)-C(27) 1.389(2)

C(22)-C(23) 1.394(2)

C(23)-C(24) 1.383(2)

C(23)-H(23) 0.9500

C(24)-C(25) 1.386(2)

C(24)-H(24) 0.9500

C(25)-C(26) 1.381(2)

C(25)-H(25) 0.9500

C(26)-C(27) 1.390(2)

C(26)-H(26) 0.9500

C(27)-H(27) 0.9500

C(19)-N(1)-C(11) 117.47(11)

C(2)-C(1)-C(6) 120.20(14)

C(2)-C(1)-H(1) 119.9

C(6)-C(1)-H(1) 119.9

C(9)-N(2)-C(6) 118.00(11)

C(1)-C(2)-C(3) 120.29(15)

C(1)-C(2)-H(2) 119.9

C(3)-C(2)-H(2) 119.9

C(20)-N(3)-C(21) 112.04(10)

C(20)-N(3)-C(10) 111.57(10)

C(21)-N(3)-C(10) 112.74(10)

C(4)-C(3)-C(2) 120.69(13)

C(4)-C(3)-H(3) 119.7

C(2)-C(3)-H(3) 119.7

C(3)-C(4)-C(5) 120.56(14)

C(3)-C(4)-H(4) 119.7

C(5)-C(4)-H(4) 119.7

C(4)-C(5)-C(7) 123.76(13)

C(4)-C(5)-C(6) 118.69(13)

C(7)-C(5)-C(6) 117.55(12)

N(2)-C(6)-C(1) 118.16(12)

N(2)-C(6)-C(5) 122.27(12)

C(1)-C(6)-C(5) 119.56(12)

C(8)-C(7)-C(5) 119.60(13)

C(8)-C(7)-H(7) 120.2

C(5)-C(7)-H(7) 120.2

C(7)-C(8)-C(9) 119.24(13)

C(7)-C(8)-H(8) 120.4

C(9)-C(8)-H(8) 120.4

N(2)-C(9)-C(8) 123.34(12)

N(2)-C(9)-C(10) 118.61(12)

C(8)-C(9)-C(10) 118.05(12)

N(3)-C(10)-C(9) 109.90(10)

N(3)-C(10)-H(10A) 109.7

C(9)-C(10)-H(10A) 109.7

N(3)-C(10)-H(10B) 109.7

C(9)-C(10)-H(10B) 109.7

H(10A)-C(10)-H(10B) 108.2

N(1)-C(11)-C(12) 118.63(12)

N(1)-C(11)-C(16) 122.62(11)

C(12)-C(11)-C(16) 118.75(12)

C(13)-C(12)-C(11) 120.25(14)

C(13)-C(12)-H(12) 119.9

C(11)-C(12)-H(12) 119.9

C(12)-C(13)-C(14) 120.84(13)

C(12)-C(13)-H(13) 119.6

C(14)-C(13)-H(13) 119.6

C(15)-C(14)-C(13) 120.09(13)

C(15)-C(14)-H(14) 120.0

C(13)-C(14)-H(14) 120.0

C(14)-C(15)-C(16) 120.43(14)

C(14)-C(15)-H(15) 119.8

C(16)-C(15)-H(15) 119.8

C(15)-C(16)-C(17) 122.67(12)

C(15)-C(16)-C(11) 119.64(12)

C(17)-C(16)-C(11) 117.69(12)

C(18)-C(17)-C(16) 119.03(12)

C(18)-C(17)-H(17) 120.5

C(16)-C(17)-H(17) 120.5

C(17)-C(18)-C(19) 119.65(12)

C(17)-C(18)-H(18) 120.2

C(19)-C(18)-H(18) 120.2

N(1)-C(19)-C(18) 123.53(12)

N(1)-C(19)-C(20) 117.97(11)

C(18)-C(19)-C(20) 118.42(11)

N(3)-C(20)-C(19) 112.01(10)

N(3)-C(20)-H(20A) 109.2

C(19)-C(20)-H(20A) 109.2

N(3)-C(20)-H(20B) 109.2

C(19)-C(20)-H(20B) 109.2

H(20A)-C(20)-H(20B) 107.9

N(3)-C(21)-C(22) 111.29(11)

N(3)-C(21)-H(21A) 109.4

C(22)-C(21)-H(21A) 109.4

N(3)-C(21)-H(21B) 109.4

C(22)-C(21)-H(21B) 109.4

H(21A)-C(21)-H(21B) 108.0

C(27)-C(22)-C(23) 118.19(14)

C(27)-C(22)-C(21) 122.11(13)

C(23)-C(22)-C(21) 119.69(12)

C(24)-C(23)-C(22) 121.13(14)

C(24)-C(23)-H(23) 119.4

C(22)-C(23)-H(23) 119.4

C(23)-C(24)-C(25) 120.02(15)

C(23)-C(24)-H(24) 120.0

C(25)-C(24)-H(24) 120.0

C(26)-C(25)-C(24) 119.54(15)

C(26)-C(25)-H(25) 120.2

C(24)-C(25)-H(25) 120.2

C(25)-C(26)-C(27) 120.33(15)

C(25)-C(26)-H(26) 119.8

C(27)-C(26)-H(26) 119.8

C(22)-C(27)-C(26) 120.78(15)

C(22)-C(27)-H(27) 119.6

C(26)-C(27)-H(27) 119.6

_____________________________________________________________

Symmetry transformations used to generate equivalent atoms:

Table SI 3. Anisotropic displacement parameters (Å2x 103)for l1_sq. The anisotropic

displacement factor exponent takes the form: -22[ h2a*2U11 + ... + 2 h k a* b* U12 ]

______________________________________________________________________________

U11 U22 U33 U23 U13 U12

______________________________________________________________________________

N(1) 21(1) 20(1) 24(1) -11(1) -3(1) -2(1)

C(1) 30(1) 32(1) 25(1) -12(1) 2(1) -9(1)

N(2) 19(1) 26(1) 22(1) -13(1) 5(1) -11(1)

C(2) 44(1) 37(1) 22(1) -9(1) -1(1) -18(1)

N(3) 23(1) 26(1) 18(1) -10(1) 1(1) -12(1)

C(3) 52(1) 40(1) 21(1) -18(1) 14(1) -28(1)

C(4) 36(1) 33(1) 32(1) -22(1) 16(1) -20(1)

C(5) 26(1) 25(1) 27(1) -16(1) 10(1) -16(1)

C(6) 23(1) 24(1) 23(1) -12(1) 6(1) -14(1)

C(7) 22(1) 28(1) 38(1) -20(1) 6(1) -7(1)

C(8) 23(1) 28(1) 30(1) -13(1) -2(1) -7(1)

C(9) 19(1) 26(1) 22(1) -11(1) 4(1) -13(1)

C(10) 22(1) 32(1) 22(1) -12(1) 4(1) -14(1)

C(11) 23(1) 18(1) 22(1) -7(1) -5(1) -3(1)

C(12) 33(1) 24(1) 34(1) -15(1) -4(1) -6(1)

C(13) 43(1) 25(1) 38(1) -13(1) -6(1) -15(1)

C(14) 33(1) 31(1) 32(1) -6(1) -3(1) -18(1)

C(15) 24(1) 25(1) 25(1) -5(1) -1(1) -9(1)

C(16) 22(1) 18(1) 19(1) -4(1) -4(1) -5(1)

C(17) 20(1) 18(1) 21(1) -8(1) 2(1) -2(1)

C(18) 23(1) 17(1) 22(1) -9(1) 1(1) -6(1)

C(19) 19(1) 18(1) 18(1) -6(1) -2(1) -3(1)

C(20) 18(1) 25(1) 24(1) -12(1) 1(1) -4(1)

C(21) 32(1) 33(1) 20(1) -13(1) 2(1) -14(1)

C(22) 30(1) 33(1) 18(1) -11(1) -2(1) -14(1)

C(23) 29(1) 40(1) 22(1) -8(1) -2(1) -13(1)

C(24) 35(1) 41(1) 26(1) -14(1) -4(1) -5(1)

C(25) 57(1) 30(1) 27(1) -10(1) -4(1) -12(1)

C(26) 56(1) 39(1) 26(1) -9(1) 9(1) -24(1)

C(27) 40(1) 37(1) 22(1) -12(1) 5(1) -15(1)

______________________________________________________________________________

1. Kryatov, S. V. *et al.* Dioxygen binding to complexes with FeII2(μ-OH)2 cores: Steric control of

activation barrier and O2-adduct formation*. Inorg. Chem*. 2005, *44,* 85-99.

| Identification code for 1 | l1_sq |
| --- | --- |
| Empirical formula | C27H23N3 |
| Formula weight | 389.48 |
| Temperature | 100(2) K |
| Wavelength | 0.71073 Å |
| Crystal system | Triclinic |
| Space group | *P -1* |
| Unit cell dimensions | a = 8.7296(6) Å |
|  | b = 11.1447(6) Å |
|  | c = 12.3411(6) Å |
| Volume | 1093.45(11) Å3 |
| Z | 2 |
| Density (calculated) | 1.183 Mg/m3 |
| Absorption coefficient | 0.070 mm-1 |
| F(000) | 412 |
