# Supplementary material for: N,N-bis(2-quinolinylmethyl)benzylamine
Source: Preprints.org preprint supplement (doi:10.20944/preprints202103.0604.v1), 2021-03-24
Supplement: Supplementary file 1 [file supplementary]

Archive with 3 entries (3 files):
- am_sn_l1.cif
- am_sn_l1_cifreport.pdf
- ESI_ Fig Tables Molbank.docx
