# Supplementary material for: N,N-bis(2-quinolinylmethyl)benzylamine
Source: Preprints.org preprint supplement (doi:10.20944/preprints202103.0604.v1), 2021-03-24
Supplement: Supplementary file 1 [file supplementary › am_sn_l1.cif]

data_am_sn_l1
_audit_creation_date               2021-03-23
_audit_creation_method
;
Olex2 1.3
(compiled 2020.11.12 svn.r5f609507 for OlexSys, GUI svn.r6272)
;
_audit_contact_author_address      ?
_audit_contact_author_email        ?
_audit_contact_author_name         ''
_audit_contact_author_phone        ?
_publ_contact_author_id_orcid      ?
_publ_section_references
;
Bourhis, L.J., Dolomanov, O.V., Gildea, R.J., Howard, J.A.K., Puschmann, H.
 (2015). Acta Cryst. A71, 59-75.

Dolomanov, O.V., Bourhis, L.J., Gildea, R.J, Howard, J.A.K. & Puschmann, H.
 (2009), J. Appl. Cryst. 42, 339-341.

Sheldrick, G.M. (2008). Acta Cryst. A64, 112-122.
;
_chemical_formula_moiety           'C27 H23 N3, 0.5[C2H6O]'
_chemical_formula_sum              'C28 H26 N3 O0.5 '
_chemical_formula_weight           412.538
loop_
  _atom_type_symbol
  _atom_type_scat_dispersion_real
  _atom_type_scat_dispersion_imag
  _atom_type_scat_Cromer_Mann_a1
  _atom_type_scat_Cromer_Mann_a2
  _atom_type_scat_Cromer_Mann_a3
  _atom_type_scat_Cromer_Mann_a4
  _atom_type_scat_Cromer_Mann_b1
  _atom_type_scat_Cromer_Mann_b2
  _atom_type_scat_Cromer_Mann_b3
  _atom_type_scat_Cromer_Mann_b4
  _atom_type_scat_Cromer_Mann_c
  _atom_type_scat_source
  _atom_type_scat_dispersion_source
 H 0.00000 0.00000 0.49300 0.32291 0.14019 0.04081 10.51090 26.12570 3.14236
 57.79970 0.0030380000826
 'International Tables Volume C Table 6.1.1.4 (pp. 500-502)'
 'Henke, Gullikson and Davis, At. Data and Nucl. Data Tables, 1993, 54, 2'
 C 0.00347 0.00161 2.31000 1.02000 1.58860 0.86500 20.84390 10.20750 0.56870
 51.65120 0.215599998832
 'International Tables Volume C Table 6.1.1.4 (pp. 500-502)'
 'Henke, Gullikson and Davis, At. Data and Nucl. Data Tables, 1993, 54, 2'
 N 0.00653 0.00323 12.21260 3.13220 2.01250 1.16630 0.00570 9.89330 28.99750
 0.58260 -11.5290002823
 'International Tables Volume C Table 6.1.1.4 (pp. 500-502)'
 'Henke, Gullikson and Davis, At. Data and Nucl. Data Tables, 1993, 54, 2'

_space_group_crystal_system        'triclinic'
_space_group_IT_number             2
_space_group_name_H-M_alt          'P -1'
_space_group_name_Hall             '-P 1'
loop_
  _space_group_symop_id
  _space_group_symop_operation_xyz
 1 x,y,z
 2 -x,-y,-z

_symmetry_Int_Tables_number        2
_cell_length_a                     8.7296(6)
_cell_length_b                     11.1447(6)
_cell_length_c                     12.3411(6)
_cell_angle_alpha                  70.914(2)
_cell_angle_beta                   86.955(2)
_cell_angle_gamma                  74.653(2)
_cell_volume                       1093.45(11)
_cell_formula_units_Z              2
_cell_measurement_reflns_used      8203
_cell_measurement_temperature      100.15
_cell_measurement_theta_max        25.99
_cell_measurement_theta_min        2.71
_exptl_absorpt_coefficient_mu      0.076
_exptl_absorpt_correction_T_max    0.7453
_exptl_absorpt_correction_T_min    0.6949
_exptl_absorpt_correction_type     multi-scan
_exptl_absorpt_process_details
;
SADABS-2012/1 (Bruker,2012) was used for absorption correction.
wR2(int) was 0.1486 before and 0.0340 after correction.
The Ratio of minimum to maximum transmission is 0.9324.
The \l/2 correction factor is 0.0015.
;
_exptl_crystal_colour              colourless
_exptl_crystal_colour_lustre       .
_exptl_crystal_colour_modifier     .
_exptl_crystal_colour_primary      colourless
_exptl_crystal_density_diffrn      1.253
_exptl_crystal_density_meas        .
_exptl_crystal_description         block
_exptl_crystal_F_000               438.163
_exptl_crystal_recrystallization_method 
 'Grown from slow evaporation of ethanol'
_exptl_crystal_size_max            0.37
_exptl_crystal_size_mid            0.17
_exptl_crystal_size_min            0.11
_diffrn_reflns_av_R_equivalents    0.0216
_diffrn_reflns_av_unetI/netI       0.0204
_diffrn_reflns_Laue_measured_fraction_full  0.9874
_diffrn_reflns_Laue_measured_fraction_max  0.9837
_diffrn_reflns_limit_h_max         10
_diffrn_reflns_limit_h_min         -10
_diffrn_reflns_limit_k_max         13
_diffrn_reflns_limit_k_min         -13
_diffrn_reflns_limit_l_max         15
_diffrn_reflns_limit_l_min         -15
_diffrn_reflns_number              12896
_diffrn_reflns_point_group_measured_fraction_full  0.9874
_diffrn_reflns_point_group_measured_fraction_max  0.9837
_diffrn_reflns_theta_full          25.2417
_diffrn_reflns_theta_max           26.01
_diffrn_reflns_theta_min           1.75
_diffrn_ambient_temperature        100.15
_diffrn_measured_fraction_theta_full  0.9874
_diffrn_measured_fraction_theta_max  0.9837
_diffrn_measurement_device_type    'Bruker APEX-II CCD'
_diffrn_measurement_method         '\f and \w scans'
_diffrn_radiation_monochromator    'graphite'
_diffrn_radiation_type             'Mo K\a'
_diffrn_radiation_wavelength       0.71073
_diffrn_standards_number           0
_reflns_Friedel_coverage           0.0
_reflns_limit_h_max                10
_reflns_limit_h_min                -10
_reflns_limit_k_max                13
_reflns_limit_k_min                -12
_reflns_limit_l_max                15
_reflns_limit_l_min                0
_reflns_number_gt                  3857
_reflns_number_total               4234
_reflns_threshold_expression       I>=2u(I)
_computing_molecular_graphics      'Olex2 1.3 (Dolomanov et al., 2009)'
_computing_publication_material    'Olex2 1.3 (Dolomanov et al., 2009)'
_computing_structure_refinement    'olex2.refine 1.3 (Bourhis et al., 2015)'
_computing_structure_solution      'SHELXS  (Sheldrick, 2008)'
_refine_diff_density_max           0.1855
_refine_diff_density_min           -0.2721
_refine_diff_density_rms           0.0553
_refine_ls_d_res_high              0.8104
_refine_ls_d_res_low               11.6548
_refine_ls_goodness_of_fit_ref     1.0660
_refine_ls_hydrogen_treatment      constr
_refine_ls_matrix_type             full
_refine_ls_number_constraints      43
_refine_ls_number_parameters       271
_refine_ls_number_reflns           4234
_refine_ls_number_restraints       0
_refine_ls_R_factor_all            0.0477
_refine_ls_R_factor_gt             0.0442
_refine_ls_restrained_S_all        1.0660
_refine_ls_shift/su_max            0.0004
_refine_ls_shift/su_mean           0.0000
_refine_ls_structure_factor_coef   Fsqd
_refine_ls_weighting_details      
 'w=1/[\s^2^(Fo^2^)+(0.0416P)^2^+0.6030P] where P=(Fo^2^+2Fc^2^)/3'
_refine_ls_weighting_scheme        calc
_refine_ls_wR_factor_gt            0.1058
_refine_ls_wR_factor_ref           0.1088
_olex2_refinement_description
;
1. Fixed Uiso
 At 1.2 times of:
  All C(H) groups, All C(H,H) groups
2.a Secondary CH2 refined with riding coordinates:
 C20(H20a,H20b), C10(H10a,H10b), C21(H21a,H21b)
2.b Aromatic/amide H refined with riding coordinates:
 C18(H18), C17(H17), C1(H1), C15(H15), C14(H14), C4(H4), C8(H8), C12(H12),
 C3(H3), C13(H13), C7(H7), C23(H23), C2(H2), C27(H27), C25(H25), C26(H26),
 C24(H24)
;
_atom_sites_solution_primary       direct
loop_
  _atom_site_label
  _atom_site_type_symbol
  _atom_site_fract_x
  _atom_site_fract_y
  _atom_site_fract_z
  _atom_site_U_iso_or_equiv
  _atom_site_adp_type
  _atom_site_occupancy
  _atom_site_refinement_flags_posn
 N1 N 0.12756(14) 0.55286(11) 0.28730(10) 0.0206(3) Uani 1.000000 .
 N2 N 0.48830(13) 0.81837(11) 0.46990(10) 0.0194(2) Uani 1.000000 .
 C5 C 0.33039(17) 0.92724(14) 0.59771(12) 0.0220(3) Uani 1.000000 .
 C16 C -0.13427(16) 0.57940(13) 0.37258(11) 0.0193(3) Uani 1.000000 .
 C11 C -0.01099(16) 0.51468(13) 0.31582(11) 0.0203(3) Uani 1.000000 .
 C19 C 0.14310(16) 0.65392(13) 0.31464(11) 0.0177(3) Uani 1.000000 .
 C18 C 0.02467(16) 0.72539(13) 0.36970(11) 0.0193(3) Uani 1.000000 .
 H18 H 0.04104(16) 0.79863(13) 0.38628(11) 0.0231(3) Uiso 1.000000 R
 C17 C -0.11264(16) 0.68854(13) 0.39870(11) 0.0192(3) Uani 1.000000 .
 H17 H -0.19279(16) 0.73538(13) 0.43593(11) 0.0231(3) Uiso 1.000000 R
 C1 C 0.57726(19) 0.75477(15) 0.66555(12) 0.0273(3) Uani 1.000000 .
 H1 H 0.66682(19) 0.69226(15) 0.65155(12) 0.0327(4) Uiso 1.000000 R
 C15 C -0.27310(17) 0.53454(14) 0.39988(12) 0.0238(3) Uani 1.000000 .
 H15 H -0.35537(17) 0.57711(14) 0.43873(12) 0.0285(4) Uiso 1.000000 R
 N3 N 0.27646(14) 0.83235(11) 0.23852(9) 0.0200(3) Uani 1.000000 .
 C20 C 0.29946(16) 0.69047(14) 0.29181(12) 0.0208(3) Uani 1.000000 .
 H20a H 0.36135(16) 0.66050(14) 0.36509(12) 0.0250(3) Uiso 1.000000 R
 H20b H 0.36159(16) 0.64461(14) 0.24075(12) 0.0250(3) Uiso 1.000000 R
 C14 C -0.28964(19) 0.43023(15) 0.37069(13) 0.0297(3) Uani 1.000000 .
 H14 H -0.38354(19) 0.40098(15) 0.38881(13) 0.0357(4) Uiso 1.000000 R
 C4 C 0.31478(19) 0.93781(15) 0.70927(13) 0.0282(3) Uani 1.000000 .
 H4 H 0.22672(19) 1.00034(15) 0.72491(13) 0.0339(4) Uiso 1.000000 R
 C6 C 0.46433(16) 0.83462(13) 0.57594(12) 0.0200(3) Uani 1.000000 .
 C8 C 0.24345(17) 0.98601(14) 0.40185(13) 0.0253(3) Uani 1.000000 .
 H8 H 0.16914(17) 1.03606(14) 0.33965(13) 0.0303(4) Uiso 1.000000 R
 C12 C -0.03125(19) 0.40700(15) 0.28668(13) 0.0280(3) Uani 1.000000 .
 H12 H 0.04990(19) 0.36283(15) 0.24818(13) 0.0336(4) Uiso 1.000000 R
 C3 C 0.4251(2) 0.85898(16) 0.79445(13) 0.0319(4) Uani 1.000000 .
 H3 H 0.4121(2) 0.86607(16) 0.86922(13) 0.0383(4) Uiso 1.000000 R
 C9 C 0.38199(16) 0.89185(13) 0.38706(11) 0.0192(3) Uani 1.000000 .
 C13 C -0.1677(2) 0.36614(15) 0.31382(14) 0.0321(4) Uani 1.000000 .
 H13 H -0.1800(2) 0.29365(15) 0.29397(14) 0.0386(4) Uiso 1.000000 R
 C7 C 0.21877(17) 1.00345(15) 0.50575(13) 0.0258(3) Uani 1.000000 .
 H7 H 0.12726(17) 1.06634(15) 0.51679(13) 0.0309(4) Uiso 1.000000 R
 C22 C 0.18839(18) 1.02246(15) 0.06436(11) 0.0245(3) Uani 1.000000 .
 C10 C 0.40735(17) 0.87597(15) 0.27001(12) 0.0221(3) Uani 1.000000 .
 H10a H 0.50952(17) 0.81045(15) 0.27083(12) 0.0265(4) Uiso 1.000000 R
 H10b H 0.41225(17) 0.96087(15) 0.21248(12) 0.0265(4) Uiso 1.000000 R
 C23 C 0.05141(18) 1.08837(16) 0.10558(12) 0.0288(3) Uani 1.000000 .
 H23 H -0.00578(18) 1.03924(16) 0.16283(12) 0.0346(4) Uiso 1.000000 R
 C2 C 0.5580(2) 0.76722(16) 0.77276(13) 0.0322(4) Uani 1.000000 .
 H2 H 0.6347(2) 0.71369(16) 0.83261(13) 0.0386(4) Uiso 1.000000 R
 C27 C 0.2684(2) 1.09674(16) -0.02057(13) 0.0308(4) Uani 1.000000 .
 H27 H 0.3613(2) 1.05379(16) -0.05059(13) 0.0369(4) Uiso 1.000000 R
 C21 C 0.24721(18) 0.87471(15) 0.11401(12) 0.0252(3) Uani 1.000000 .
 H21a H 0.34683(18) 0.84418(15) 0.07726(12) 0.0302(4) Uiso 1.000000 R
 H21b H 0.16723(18) 0.83406(15) 0.09720(12) 0.0302(4) Uiso 1.000000 R
 C25 C 0.0795(2) 1.29699(17) -0.01929(14) 0.0368(4) Uani 1.000000 .
 H25 H 0.0433(2) 1.39026(17) -0.04706(14) 0.0442(5) Uiso 1.000000 R
 C26 C 0.2142(2) 1.23307(17) -0.06206(14) 0.0379(4) Uani 1.000000 .
 H26 H 0.2700(2) 1.28252(17) -0.12016(14) 0.0454(5) Uiso 1.000000 R
 C24 C -0.0027(2) 1.22409(17) 0.06456(13) 0.0331(4) Uani 1.000000 .
 H24 H -0.0961(2) 1.26739(17) 0.09379(13) 0.0397(4) Uiso 1.000000 R

loop_
  _atom_site_aniso_label
  _atom_site_aniso_U_11
  _atom_site_aniso_U_22
  _atom_site_aniso_U_33
  _atom_site_aniso_U_12
  _atom_site_aniso_U_13
  _atom_site_aniso_U_23
 N1 0.0202(6) 0.0194(6) 0.0236(6) -0.0019(5) -0.0025(5) -0.0111(5)
 N2 0.0183(6) 0.0252(6) 0.0209(6) -0.0102(5) 0.0047(4) -0.0126(5)
 C5 0.0251(7) 0.0240(7) 0.0266(7) -0.0155(6) 0.0096(6) -0.0153(6)
 C16 0.0211(7) 0.0171(6) 0.0185(6) -0.0050(5) -0.0036(5) -0.0034(5)
 C11 0.0220(7) 0.0171(6) 0.0213(6) -0.0031(5) -0.0049(5) -0.0065(5)
 C19 0.0184(7) 0.0171(6) 0.0172(6) -0.0030(5) -0.0020(5) -0.0058(5)
 C18 0.0225(7) 0.0164(6) 0.0217(6) -0.0054(5) 0.0006(5) -0.0094(5)
 C17 0.0196(7) 0.0171(6) 0.0208(6) -0.0025(5) 0.0020(5) -0.0079(5)
 C1 0.0293(8) 0.0310(8) 0.0244(7) -0.0091(6) 0.0015(6) -0.0120(6)
 C15 0.0232(7) 0.0238(7) 0.0241(7) -0.0088(6) -0.0007(6) -0.0052(6)
 N3 0.0223(6) 0.0255(6) 0.0172(6) -0.0118(5) 0.0010(4) -0.0092(5)
 C20 0.0173(7) 0.0238(7) 0.0237(7) -0.0039(5) 0.0008(5) -0.0119(6)
 C14 0.0316(8) 0.0299(8) 0.0311(8) -0.0174(7) -0.0032(6) -0.0061(6)
 C4 0.0348(8) 0.0326(8) 0.0305(8) -0.0198(7) 0.0162(7) -0.0212(7)
 C6 0.0218(7) 0.0234(7) 0.0218(7) -0.0133(6) 0.0055(5) -0.0116(5)
 C8 0.0224(7) 0.0270(7) 0.0297(8) -0.0066(6) -0.0022(6) -0.0129(6)
 C12 0.0319(8) 0.0230(7) 0.0335(8) -0.0061(6) -0.0036(6) -0.0149(6)
 C3 0.0515(10) 0.0388(9) 0.0199(7) -0.0281(8) 0.0145(7) -0.0177(7)
 C9 0.0184(7) 0.0247(7) 0.0215(7) -0.0131(5) 0.0041(5) -0.0112(5)
 C13 0.0420(9) 0.0243(8) 0.0368(9) -0.0148(7) -0.0061(7) -0.0127(7)
 C7 0.0208(7) 0.0267(7) 0.0368(8) -0.0072(6) 0.0064(6) -0.0198(6)
 C22 0.0298(8) 0.0324(8) 0.0171(6) -0.0143(6) -0.0022(6) -0.0101(6)
 C10 0.0209(7) 0.0311(8) 0.0206(7) -0.0134(6) 0.0039(5) -0.0121(6)
 C23 0.0281(8) 0.0386(9) 0.0211(7) -0.0130(7) -0.0014(6) -0.0077(6)
 C2 0.0434(9) 0.0366(9) 0.0209(7) -0.0173(7) -0.0007(6) -0.0094(6)
 C27 0.0391(9) 0.0357(9) 0.0216(7) -0.0144(7) 0.0052(6) -0.0116(6)
 C21 0.0310(8) 0.0323(8) 0.0186(7) -0.0139(6) 0.0018(6) -0.0126(6)
 C25 0.0558(11) 0.0297(8) 0.0266(8) -0.0119(8) -0.0040(7) -0.0097(7)
 C26 0.0555(11) 0.0384(9) 0.0248(8) -0.0238(8) 0.0086(7) -0.0090(7)
 C24 0.0346(9) 0.0397(9) 0.0248(8) -0.0045(7) -0.0042(6) -0.0136(7)

loop_
  _geom_bond_atom_site_label_1
  _geom_bond_atom_site_label_2
  _geom_bond_distance
  _geom_bond_site_symmetry_2
  _geom_bond_publ_flag
 N1 C11 1.3773(18) . ?
 N1 C19 1.3172(17) . ?
 N2 C6 1.3766(17) . ?
 N2 C9 1.3146(18) . ?
 C5 C4 1.4162(19) . ?
 C5 C6 1.4191(19) . ?
 C5 C7 1.417(2) . ?
 C16 C11 1.4172(19) . ?
 C16 C17 1.4154(18) . ?
 C16 C15 1.4140(19) . ?
 C11 C12 1.4150(19) . ?
 C19 C18 1.4172(18) . ?
 C19 C20 1.5122(18) . ?
 C18 C17 1.3610(19) . ?
 C1 C6 1.412(2) . ?
 C1 C2 1.372(2) . ?
 C15 C14 1.368(2) . ?
 N3 C20 1.4625(18) . ?
 N3 C10 1.4689(17) . ?
 N3 C21 1.4672(17) . ?
 C14 C13 1.408(2) . ?
 C4 C3 1.364(2) . ?
 C8 C9 1.424(2) . ?
 C8 C7 1.356(2) . ?
 C12 C13 1.372(2) . ?
 C3 C2 1.408(2) . ?
 C9 C10 1.5098(18) . ?
 C22 C23 1.394(2) . ?
 C22 C27 1.390(2) . ?
 C22 C21 1.509(2) . ?
 C23 C24 1.383(2) . ?
 C27 C26 1.390(2) . ?
 C25 C26 1.380(3) . ?
 C25 C24 1.388(2) . ?

loop_
  _geom_angle_atom_site_label_1
  _geom_angle_atom_site_label_2
  _geom_angle_atom_site_label_3
  _geom_angle
  _geom_angle_site_symmetry_1
  _geom_angle_site_symmetry_3
  _geom_angle_publ_flag
 C19 N1 C11 117.47(12) . . ?
 C9 N2 C6 117.96(12) . . ?
 C6 C5 C4 118.69(14) . . ?
 C7 C5 C4 123.76(14) . . ?
 C7 C5 C6 117.55(12) . . ?
 C17 C16 C11 117.71(12) . . ?
 C15 C16 C11 119.65(12) . . ?
 C15 C16 C17 122.64(13) . . ?
 C16 C11 N1 122.61(12) . . ?
 C12 C11 N1 118.63(13) . . ?
 C12 C11 C16 118.76(13) . . ?
 C18 C19 N1 123.53(12) . . ?
 C20 C19 N1 117.96(12) . . ?
 C20 C19 C18 118.42(11) . . ?
 C17 C18 C19 119.64(12) . . ?
 C18 C17 C16 119.03(12) . . ?
 C2 C1 C6 120.19(15) . . ?
 C14 C15 C16 120.39(14) . . ?
 C10 N3 C20 111.53(11) . . ?
 C21 N3 C20 112.05(10) . . ?
 C21 N3 C10 112.72(11) . . ?
 N3 C20 C19 111.96(11) . . ?
 C13 C14 C15 120.08(14) . . ?
 C3 C4 C5 120.56(14) . . ?
 C5 C6 N2 122.28(13) . . ?
 C1 C6 N2 118.15(13) . . ?
 C1 C6 C5 119.57(13) . . ?
 C7 C8 C9 119.25(14) . . ?
 C13 C12 C11 120.24(14) . . ?
 C2 C3 C4 120.71(13) . . ?
 C8 C9 N2 123.39(12) . . ?
 C10 C9 N2 118.58(12) . . ?
 C10 C9 C8 118.03(12) . . ?
 C12 C13 C14 120.87(13) . . ?
 C8 C7 C5 119.56(13) . . ?
 C27 C22 C23 118.18(14) . . ?
 C21 C22 C23 119.72(13) . . ?
 C21 C22 C27 122.08(14) . . ?
 C9 C10 N3 109.90(11) . . ?
 C24 C23 C22 121.14(14) . . ?
 C3 C2 C1 120.28(15) . . ?
 C26 C27 C22 120.78(15) . . ?
 C22 C21 N3 111.26(11) . . ?
 C24 C25 C26 119.55(16) . . ?
 C25 C26 C27 120.34(15) . . ?
 C25 C24 C23 120.00(16) . . ?

loop_
  _geom_torsion_atom_site_label_1
  _geom_torsion_atom_site_label_2
  _geom_torsion_atom_site_label_3
  _geom_torsion_atom_site_label_4
  _geom_torsion
  _geom_torsion_site_symmetry_1
  _geom_torsion_site_symmetry_2
  _geom_torsion_site_symmetry_3
  _geom_torsion_site_symmetry_4
  _geom_torsion_publ_flag
 N1 C11 C16 C17 0.93(15) . . . . ?
 N1 C11 C16 C15 -179.65(13) . . . . ?
 N1 C11 C12 C13 179.95(13) . . . . ?
 N1 C19 C18 C17 1.17(15) . . . . ?
 N1 C19 C20 N3 134.95(12) . . . . ?
 N2 C6 C5 C4 -179.95(12) . . . . ?
 N2 C6 C5 C7 0.55(15) . . . . ?
 N2 C6 C1 C2 -179.79(13) . . . . ?
 N2 C9 C8 C7 0.88(15) . . . . ?
 N2 C9 C10 N3 118.33(12) . . . . ?
 C5 C4 C3 C2 1.11(16) . . . . ?
 C5 C6 C1 C2 -0.36(15) . . . . ?
 C5 C7 C8 C9 -0.44(16) . . . . ?
 C16 C11 C12 C13 -0.39(15) . . . . ?
 C16 C17 C18 C19 -0.26(15) . . . . ?
 C16 C15 C14 C13 0.44(16) . . . . ?
 C11 C12 C13 C14 0.10(17) . . . . ?
 C19 C20 N3 C10 150.03(11) . . . . ?
 C19 C20 N3 C21 -82.54(12) . . . . ?
 C1 C2 C3 C4 -0.81(18) . . . . ?
 C15 C14 C13 C12 -0.12(18) . . . . ?
 N3 C10 C9 C8 -61.62(13) . . . . ?
 N3 C21 C22 C23 -57.22(13) . . . . ?
 N3 C21 C22 C27 121.47(12) . . . . ?
 C22 C23 C24 C25 0.17(17) . . . . ?
 C22 C27 C26 C25 0.06(18) . . . . ?
 C23 C24 C25 C26 0.68(18) . . . . ?
 C27 C26 C25 C24 -0.79(19) . . . . ?

_smtbx_masks_special_details
;
A solvent mask was calculated and 26 electrons were 
found in a volume of 109\%A^3^ in 1 void per unit cell. This is consistent with the presence of 0.5[C2H6O] per Asymmetric Unit 
which account for 26 electrons per unit cell. The mask was used because the ethanol is on the lattice point,
causing a lot of disorder.
;
loop_
  _smtbx_masks_void_nr
  _smtbx_masks_void_average_x
  _smtbx_masks_void_average_y
  _smtbx_masks_void_average_z
  _smtbx_masks_void_volume
  _smtbx_masks_void_count_electrons
  _smtbx_masks_void_content
 1 0.500 0.500 0.000 108.8 26.3 '1 ethanol'

_smtbx_masks_void_probe_radius     1.2
_smtbx_masks_void_truncation_radius  1.2
_shelx_fab_file
;
-10 -7 1 0.0307 -0.0010
-10 -6 1 0.0160 0.0002
-10 -6 2 0.0126 -0.0000
-10 -5 1 0.0119 0.0007
-10 -5 2 0.0552 0.0006
-10 -5 3 0.0725 0.0002
-10 -4 1 -0.0892 -0.0008
-10 -4 2 -0.1503 -0.0006
-10 -4 3 -0.1756 0.0002
-10 -4 4 -0.2013 0.0009
-10 -3 1 0.0938 0.0008
-10 -3 2 0.1673 0.0004
-10 -3 3 0.1856 -0.0005
-10 -3 4 0.2012 -0.0013
-10 -2 1 -0.0070 -0.0011
-10 -2 2 -0.1349 -0.0007
-10 -2 3 -0.1673 0.0003
-10 -2 4 -0.1752 0.0012
-10 -1 1 -0.0358 0.0015
-10 -1 2 0.1919 0.0011
-10 -1 3 0.2681 0.0002
-10 -1 4 0.2612 -0.0007
-10 0 1 -0.0355 -0.0016
-10 0 2 -0.3355 -0.0013
-10 0 3 -0.4488 -0.0005
-10 0 4 -0.4115 0.0002
-10 1 1 0.1045 0.0017
-10 1 2 0.3788 0.0014
-10 1 3 0.4912 0.0007
-9 -9 1 0.0065 -0.0009
-9 -8 1 -0.0125 0.0003
-9 -8 2 -0.1538 -0.0001
-9 -8 3 -0.1838 -0.0001
-9 -7 1 0.0676 0.0005
-9 -7 2 0.2291 0.0007
-9 -7 3 0.2963 0.0005
-9 -7 4 0.2481 0.0002
-9 -6 1 -0.1892 -0.0003
-9 -6 2 -0.3412 -0.0003
-9 -6 3 -0.4154 -0.0002
-9 -6 4 -0.3668 -0.0001
-9 -6 5 -0.2538 -0.0003
-9 -5 1 0.2874 -0.0001
-9 -5 2 0.4079 -0.0002
-9 -5 3 0.4582 -0.0002
-9 -5 4 0.3912 0.0000
-9 -5 5 0.2613 0.0004
-9 -5 6 0.1417 0.0007
-9 -4 1 -0.3247 -0.0004
-9 -4 2 -0.4138 -0.0001
-9 -4 3 -0.4286 -0.0001
-9 -4 4 -0.3304 -0.0003
-9 -4 5 -0.1848 -0.0005
-9 -4 6 -0.0799 -0.0006
-9 -3 1 0.4375 0.0010
-9 -3 2 0.4998 0.0006
-9 -3 3 0.4728 0.0005
-9 -3 4 0.3221 0.0005
-9 -3 5 0.1317 0.0005
-9 -3 6 0.0224 0.0003
-9 -3 7 0.0144 0.0001
-9 -2 1 -0.7152 -0.0010
-9 -2 2 -0.7169 -0.0005
-9 -2 3 -0.6184 -0.0003
-9 -2 4 -0.3851 -0.0003
-9 -2 5 -0.1083 -0.0001
-9 -2 6 0.0551 0.0001
-9 -2 7 0.0497 0.0001
-9 -1 1 0.9804 0.0009
-9 -1 2 0.8509 0.0003
-9 -1 3 0.6395 -0.0000
-9 -1 4 0.3204 -0.0002
-9 -1 5 -0.0329 -0.0002
-9 -1 6 -0.2556 -0.0003
-9 -1 7 -0.2570 -0.0002
-9 0 1 -1.0012 -0.0015
-9 0 2 -0.7101 -0.0006
-9 0 3 -0.3826 0.0001
-9 0 4 -0.0259 0.0004
-9 0 5 0.3208 0.0005
-9 0 6 0.5323 0.0004
-9 0 7 0.5137 0.0000
-9 1 1 0.8185 0.0019
-9 1 2 0.4345 0.0009
-9 1 3 0.0465 -0.0001
-9 1 4 -0.2810 -0.0007
-9 1 5 -0.5334 -0.0008
-9 1 6 -0.6552 -0.0005
-9 1 7 -0.5865 0.0000
-9 2 1 -0.6453 -0.0010
-9 2 2 -0.2865 -0.0001
-9 2 3 0.0872 0.0008
-9 2 4 0.3514 0.0012
-9 2 5 0.4919 0.0011
-9 2 6 0.5160 0.0006
-9 3 1 0.5344 -0.0008
-9 3 2 0.2712 -0.0011
-9 3 3 -0.0378 -0.0013
-9 3 4 -0.2382 -0.0013
-9 3 5 -0.3049 -0.0010
-9 4 1 -0.3757 0.0020
-9 4 2 -0.2052 0.0016
-9 4 3 0.0145 0.0010
-8 -10 1 -0.4807 0.0014
-8 -10 2 -0.3530 0.0007
-8 -9 1 0.4603 -0.0000
-8 -9 2 0.2543 0.0004
-8 -9 3 0.1040 0.0009
-8 -8 1 -0.4130 -0.0004
-8 -8 2 -0.1313 -0.0006
-8 -8 3 0.0656 -0.0010
-8 -8 4 0.2152 -0.0009
-8 -8 5 0.3410 -0.0003
-8 -7 1 0.3898 0.0002
-8 -7 2 0.0523 0.0003
-8 -7 3 -0.1970 0.0005
-8 -7 4 -0.3717 0.0004
-8 -7 5 -0.5086 -0.0002
-8 -7 6 -0.5407 -0.0007
-8 -6 1 -0.2909 -0.0007
-8 -6 2 0.0834 -0.0006
-8 -6 3 0.3703 -0.0005
-8 -6 4 0.5592 -0.0002
-8 -6 5 0.6886 0.0005
-8 -6 6 0.7136 0.0011
-8 -6 7 0.5571 0.0012
-8 -5 1 0.1223 0.0014
-8 -5 2 -0.2798 0.0012
-8 -5 3 -0.5819 0.0008
-8 -5 4 -0.7584 0.0003
-8 -5 5 -0.8490 -0.0005
-8 -5 6 -0.8375 -0.0012
-8 -5 7 -0.6638 -0.0014
-8 -4 1 -0.0150 -0.0008
-8 -4 2 0.4215 -0.0007
-8 -4 3 0.7310 -0.0004
-8 -4 4 0.8783 -0.0000
-8 -4 5 0.9120 0.0005
-8 -4 6 0.8543 0.0009
-8 -4 7 0.6727 0.0010
-8 -4 8 0.3874 0.0006
-8 -3 1 -0.0581 -0.0003
-8 -3 2 -0.5474 -0.0003
-8 -3 3 -0.8712 -0.0003
-8 -3 4 -0.9784 -0.0003
-8 -3 5 -0.9346 -0.0003
-8 -3 6 -0.8168 -0.0003
-8 -3 7 -0.6333 -0.0002
-8 -3 8 -0.3865 -0.0000
-8 -2 1 0.2778 0.0004
-8 -2 2 0.8154 0.0004
-8 -2 3 1.1449 0.0005
-8 -2 4 1.1880 0.0003
-8 -2 5 1.0241 -0.0001
-8 -2 6 0.7984 -0.0004
-8 -2 7 0.5816 -0.0005
-8 -2 8 0.3673 -0.0004
-8 -2 9 0.1751 -0.0003
-8 -1 1 -0.6286 0.0002
-8 -1 2 -1.1501 -0.0001
-8 -1 3 -1.4415 -0.0002
-8 -1 4 -1.3952 -0.0001
-8 -1 5 -1.0854 0.0004
-8 -1 6 -0.7139 0.0007
-8 -1 7 -0.4259 0.0007
-8 -1 8 -0.2276 0.0002
-8 -1 9 -0.0848 -0.0003
-8 0 1 0.8497 0.0003
-8 0 2 1.2586 0.0006
-8 0 3 1.4568 0.0007
-8 0 4 1.3296 0.0004
-8 0 5 0.9221 -0.0001
-8 0 6 0.4483 -0.0005
-8 0 7 0.1077 -0.0003
-8 0 8 -0.0646 0.0004
-8 0 9 -0.1357 0.0011
-8 1 1 -0.8135 -0.0020
-8 1 2 -1.0606 -0.0019
-8 1 3 -1.1415 -0.0014
-8 1 4 -0.9774 -0.0007
-8 1 5 -0.5775 -0.0000
-8 1 6 -0.1133 0.0003
-8 1 7 0.2101 -0.0000
-8 1 8 0.3308 -0.0009
-8 1 9 0.3208 -0.0017
-8 2 1 0.6819 0.0032
-8 2 2 0.8017 0.0026
-8 2 3 0.7840 0.0014
-8 2 4 0.6233 0.0003
-8 2 5 0.3103 -0.0005
-8 2 6 -0.0567 -0.0006
-8 2 7 -0.3135 -0.0000
-8 2 8 -0.3856 0.0009
-8 2 9 -0.3262 0.0015
-8 3 1 -0.6054 -0.0029
-8 3 2 -0.6679 -0.0021
-8 3 3 -0.5936 -0.0007
-8 3 4 -0.4514 0.0005
-8 3 5 -0.2352 0.0011
-8 3 6 0.0239 0.0009
-8 3 7 0.2198 0.0003
-8 3 8 0.2772 -0.0005
-8 4 1 0.5150 0.0018
-8 4 2 0.5631 0.0013
-8 4 3 0.4784 0.0003
-8 4 4 0.3644 -0.0006
-8 4 5 0.2237 -0.0010
-8 4 6 0.0448 -0.0007
-8 4 7 -0.1123 -0.0002
-8 4 8 -0.1753 0.0002
-8 5 1 -0.3195 -0.0008
-8 5 2 -0.3584 -0.0009
-8 5 3 -0.2976 -0.0006
-8 5 4 -0.2286 -0.0001
-8 5 5 -0.1522 0.0002
-8 5 6 -0.0387 0.0001
-8 5 7 0.0777 -0.0001
-8 6 1 0.1098 0.0003
-8 6 2 0.1301 0.0008
-8 6 3 0.0972 0.0009
-8 6 4 0.0697 0.0006
-7 -11 1 -0.3512 0.0013
-7 -10 1 0.6503 -0.0022
-7 -10 2 0.8000 -0.0015
-7 -10 3 0.7486 -0.0008
-7 -9 1 -0.7949 0.0023
-7 -9 2 -0.9270 0.0013
-7 -9 3 -0.8790 0.0003
-7 -9 4 -0.5750 -0.0003
-7 -9 5 -0.1342 -0.0003
-7 -8 1 0.9167 -0.0027
-7 -8 2 0.9884 -0.0015
-7 -8 3 0.9032 -0.0001
-7 -8 4 0.5643 0.0007
-7 -8 5 0.0491 0.0008
-7 -8 6 -0.3472 0.0004
-7 -7 1 -1.1628 0.0032
-7 -7 2 -1.1625 0.0020
-7 -7 3 -1.0023 0.0004
-7 -7 4 -0.5979 -0.0007
-7 -7 5 -0.0003 -0.0009
-7 -7 6 0.4958 -0.0005
-7 -7 7 0.6070 -0.0000
-7 -6 1 1.3883 -0.0024
-7 -6 2 1.3219 -0.0015
-7 -6 3 1.0792 -0.0003
-7 -6 4 0.6067 0.0006
-7 -6 5 -0.0565 0.0007
-7 -6 6 -0.6382 0.0003
-7 -6 7 -0.8308 -0.0002
-7 -6 8 -0.6069 -0.0005
-7 -5 1 -1.4101 0.0006
-7 -5 2 -1.2806 0.0002
-7 -5 3 -0.9722 -0.0003
-7 -5 4 -0.4658 -0.0007
-7 -5 5 0.2060 -0.0006
-7 -5 6 0.8155 -0.0001
-7 -5 7 1.0696 0.0004
-7 -5 8 0.8963 0.0006
-7 -5 9 0.5093 0.0006
-7 -4 1 1.3331 0.0005
-7 -4 2 1.1306 0.0004
-7 -4 3 0.7660 0.0004
-7 -4 4 0.2555 0.0004
-7 -4 5 -0.3725 0.0002
-7 -4 6 -0.9487 -0.0001
-7 -4 7 -1.2252 -0.0004
-7 -4 8 -1.1051 -0.0004
-7 -4 9 -0.7393 -0.0002
-7 -3 1 -1.3499 -0.0003
-7 -3 2 -1.0478 -0.0002
-7 -3 3 -0.6060 0.0000
-7 -3 4 -0.0865 0.0001
-7 -3 5 0.4804 0.0002
-7 -3 6 0.9884 0.0002
-7 -3 7 1.2523 0.0002
-7 -3 8 1.1689 -0.0000
-7 -3 9 0.8351 -0.0003
-7 -3 10 0.4519 -0.0005
-7 -2 1 1.4202 0.0007
-7 -2 2 0.9865 0.0004
-7 -2 3 0.4300 -0.0000
-7 -2 4 -0.1203 -0.0003
-7 -2 5 -0.6213 -0.0002
-7 -2 6 -1.0300 0.0000
-7 -2 7 -1.2358 0.0002
-7 -2 8 -1.1468 0.0004
-7 -2 9 -0.8219 0.0006
-7 -2 10 -0.4403 0.0006
-7 -1 1 -1.4070 -0.0024
-7 -1 2 -0.8411 -0.0017
-7 -1 3 -0.1571 -0.0006
-7 -1 4 0.4331 -0.0000
-7 -1 5 0.8563 0.0000
-7 -1 6 1.1279 -0.0003
-7 -1 7 1.2214 -0.0005
-7 -1 8 1.0742 -0.0005
-7 -1 9 0.7216 -0.0003
-7 -1 10 0.3306 -0.0001
-7 0 1 1.3483 0.0041
-7 0 2 0.7095 0.0028
-7 0 3 -0.0626 0.0011
-7 0 4 -0.6834 -0.0001
-7 0 5 -1.0336 -0.0003
-7 0 6 -1.1651 -0.0000
-7 0 7 -1.1321 0.0002
-7 0 8 -0.9137 0.0000
-7 0 9 -0.5310 -0.0005
-7 0 10 -0.1367 -0.0009
-7 1 1 -1.3485 -0.0044
-7 1 2 -0.7291 -0.0029
-7 1 3 0.0510 -0.0009
-7 1 4 0.6819 0.0005
-7 1 5 0.9965 0.0009
-7 1 6 1.0456 0.0006
-7 1 7 0.9362 0.0003
-7 1 8 0.6894 0.0005
-7 1 9 0.3193 0.0011
-7 1 10 -0.0442 0.0016
-7 1 11 -0.2309 0.0016
-7 2 1 1.3437 0.0034
-7 2 2 0.8042 0.0022
-7 2 3 0.0951 0.0005
-7 2 4 -0.5142 -0.0007
-7 2 5 -0.8294 -0.0010
-7 2 6 -0.8661 -0.0006
-7 2 7 -0.7420 -0.0003
-7 2 8 -0.5104 -0.0004
-7 2 9 -0.1891 -0.0008
-7 2 10 0.1152 -0.0012
-7 3 1 -1.1985 -0.0018
-7 3 2 -0.7324 -0.0011
-7 3 3 -0.1302 -0.0002
-7 3 4 0.4229 0.0004
-7 3 5 0.7376 0.0005
-7 3 6 0.7831 0.0002
-7 3 7 0.6563 -0.0002
-7 3 8 0.4317 -0.0003
-7 3 9 0.1448 -0.0001
-7 3 10 -0.1102 0.0002
-7 4 1 0.9483 0.0003
-7 4 2 0.5121 -0.0000
-7 4 3 -0.0008 -0.0003
-7 4 4 -0.4841 -0.0003
-7 4 5 -0.7761 -0.0002
-7 4 6 -0.8127 0.0001
-7 4 7 -0.6618 0.0004
-7 4 8 -0.4115 0.0007
-7 4 9 -0.1222 0.0008
-7 4 10 0.1129 0.0006
-7 5 1 -0.7531 0.0002
-7 5 2 -0.3277 0.0006
-7 5 3 0.1278 0.0007
-7 5 4 0.5487 0.0005
-7 5 5 0.8062 0.0002
-7 5 6 0.8271 0.0000
-7 5 7 0.6587 -0.0002
-7 5 8 0.3934 -0.0005
-7 5 9 0.1067 -0.0008
-7 6 1 0.6456 0.0001
-7 6 2 0.2676 -0.0004
-7 6 3 -0.1208 -0.0006
-7 6 4 -0.4669 -0.0004
-7 6 5 -0.6769 -0.0001
-7 6 6 -0.6919 -0.0001
-7 6 7 -0.5489 -0.0001
-7 6 8 -0.3304 0.0002
-7 7 1 -0.4833 -0.0006
-7 7 2 -0.2116 0.0001
-7 7 3 0.0544 0.0003
-7 7 4 0.2737 0.0001
-7 7 5 0.3981 -0.0002
-7 7 6 0.4000 -0.0002
-7 7 7 0.3107 -0.0000
-6 -11 1 -0.4581 0.0013
-6 -11 2 -0.0850 0.0008
-6 -11 3 0.1331 0.0004
-6 -10 1 0.3724 -0.0015
-6 -10 2 -0.1457 -0.0008
-6 -10 3 -0.5025 -0.0001
-6 -10 4 -0.5443 0.0002
-6 -9 1 -0.2878 0.0017
-6 -9 2 0.3296 0.0009
-6 -9 3 0.8052 -0.0000
-6 -9 4 0.9074 -0.0005
-6 -9 5 0.6613 -0.0005
-6 -9 6 0.3212 -0.0003
-6 -8 1 0.1982 -0.0010
-6 -8 2 -0.4646 -0.0004
-6 -8 3 -0.9962 0.0003
-6 -8 4 -1.1353 0.0006
-6 -8 5 -0.8604 0.0005
-6 -8 6 -0.4376 0.0003
-6 -8 7 -0.1408 -0.0000
-6 -7 1 0.0658 -0.0004
-6 -7 2 0.7497 -0.0006
-6 -7 3 1.2623 -0.0007
-6 -7 4 1.3707 -0.0007
-6 -7 5 1.0445 -0.0004
-6 -7 6 0.5504 -0.0001
-6 -7 7 0.1998 0.0001
-6 -7 8 0.0707 0.0001
-6 -6 1 -0.4617 0.0013
-6 -6 2 -1.1751 0.0011
-6 -6 3 -1.6270 0.0009
-6 -6 4 -1.6486 0.0005
-6 -6 5 -1.2341 0.0000
-6 -6 6 -0.6439 -0.0002
-6 -6 7 -0.2042 -0.0001
-6 -6 8 -0.0275 0.0001
-6 -6 9 -0.0019 0.0004
-6 -5 1 0.7137 -0.0008
-6 -5 2 1.4712 -0.0007
-6 -5 3 1.8721 -0.0005
-6 -5 4 1.8129 -0.0001
-6 -5 5 1.3199 0.0003
-6 -5 6 0.6328 0.0004
-6 -5 7 0.0699 0.0002
-6 -5 8 -0.2126 -0.0002
-6 -5 9 -0.2737 -0.0006
-6 -4 1 -0.7165 -0.0000
-6 -4 2 -1.5184 0.0001
-6 -4 3 -1.9028 0.0001
-6 -4 4 -1.8129 -0.0000
-6 -4 5 -1.2949 -0.0002
-6 -4 6 -0.5506 -0.0003
-6 -4 7 0.1302 -0.0002
-6 -4 8 0.5478 0.0002
-6 -4 9 0.6777 0.0005
-6 -4 10 0.5883 0.0007
-6 -3 1 0.6861 -0.0000
-6 -3 2 1.5106 -0.0001
-6 -3 3 1.8891 -0.0002
-6 -3 4 1.7986 -0.0002
-6 -3 5 1.2944 -0.0001
-6 -3 6 0.5338 -0.0000
-6 -3 7 -0.2331 0.0000
-6 -3 8 -0.7765 -0.0000
-6 -3 9 -0.9917 -0.0002
-6 -3 10 -0.8908 -0.0003
-6 -3 11 -0.5613 -0.0004
-6 -2 1 -0.8550 0.0008
-6 -2 2 -1.6523 0.0007
-6 -2 3 -1.9826 0.0005
-6 -2 4 -1.8644 0.0004
-6 -2 5 -1.3658 0.0002
-6 -2 6 -0.6064 0.0001
-6 -2 7 0.2045 -0.0000
-6 -2 8 0.8266 -0.0002
-6 -2 9 1.1081 -0.0002
-6 -2 10 1.0283 -0.0001
-6 -2 11 0.6748 0.0001
-6 -1 1 1.2397 -0.0015
-6 -1 2 1.9377 -0.0012
-6 -1 3 2.1380 -0.0007
-6 -1 4 1.9260 -0.0002
-6 -1 5 1.3982 0.0001
-6 -1 6 0.6473 0.0002
-6 -1 7 -0.1568 0.0003
-6 -1 8 -0.7828 0.0004
-6 -1 9 -1.0687 0.0004
-6 -1 10 -1.0001 0.0002
-6 -1 11 -0.6764 -0.0001
-6 0 1 -1.7307 0.0012
-6 0 2 -2.2695 0.0010
-6 0 3 -2.2706 0.0005
-6 0 4 -1.9056 0.0000
-6 0 5 -1.3163 -0.0003
-6 0 6 -0.5777 -0.0004
-6 0 7 0.1821 -0.0004
-6 0 8 0.7514 -0.0002
-6 0 9 0.9773 0.0000
-6 0 10 0.8756 0.0003
-6 0 11 0.5775 0.0005
-6 0 12 0.2357 0.0007
-6 1 1 2.2077 0.0001
-6 1 2 2.5818 0.0001
-6 1 3 2.3823 0.0001
-6 1 4 1.8544 0.0002
-6 1 5 1.1897 0.0003
-6 1 6 0.4543 0.0003
-6 1 7 -0.2642 0.0002
-6 1 8 -0.7758 -0.0002
-6 1 9 -0.9318 -0.0005
-6 1 10 -0.7720 -0.0008
-6 1 11 -0.4673 -0.0009
-6 1 12 -0.1716 -0.0008
-6 2 1 -2.5321 -0.0017
-6 2 2 -2.7881 -0.0013
-6 2 3 -2.4626 -0.0008
-6 2 4 -1.8246 -0.0003
-6 2 5 -1.1007 -0.0002
-6 2 6 -0.3598 -0.0001
-6 2 7 0.3411 -0.0000
-6 2 8 0.8321 0.0001
-6 2 9 0.9570 0.0004
-6 2 10 0.7573 0.0005
-6 2 11 0.4321 0.0005
-6 2 12 0.1514 0.0002
-6 3 1 2.5943 0.0022
-6 3 2 2.7726 0.0017
-6 3 3 2.4089 0.0009
-6 3 4 1.7382 0.0003
-6 3 5 0.9958 -0.0000
-6 3 6 0.2661 -0.0000
-6 3 7 -0.4075 0.0001
-6 3 8 -0.8766 0.0002
-6 3 9 -0.9840 0.0003
-6 3 10 -0.7633 0.0003
-6 3 11 -0.4255 0.0003
-6 3 12 -0.1556 0.0004
-6 4 1 -2.4352 -0.0013
-6 4 2 -2.5214 -0.0010
-6 4 3 -2.1436 -0.0004
-6 4 4 -1.4742 0.0001
-6 4 5 -0.7389 0.0003
-6 4 6 -0.0494 0.0002
-6 4 7 0.5454 -0.0001
-6 4 8 0.9256 -0.0005
-6 4 9 0.9600 -0.0007
-6 4 10 0.6917 -0.0006
-6 4 11 0.3402 -0.0004
-6 5 1 2.2304 0.0006
-6 5 2 2.1897 0.0003
-6 5 3 1.7630 0.0001
-6 5 4 1.0709 -0.0002
-6 5 5 0.3268 -0.0003
-6 5 6 -0.3207 -0.0003
-6 5 7 -0.8017 -0.0001
-6 5 8 -1.0277 0.0002
-6 5 9 -0.9214 0.0005
-6 5 10 -0.5616 0.0004
-6 5 11 -0.1821 0.0000
-6 6 1 -2.0856 -0.0010
-6 6 2 -1.9465 -0.0007
-6 6 3 -1.4706 -0.0005
-6 6 4 -0.7490 -0.0003
-6 6 5 0.0146 -0.0000
-6 6 6 0.6378 0.0003
-6 6 7 1.0224 0.0004
-6 6 8 1.1063 0.0001
-6 6 9 0.8714 -0.0002
-6 6 10 0.4371 -0.0002
-6 7 1 1.8806 0.0017
-6 7 2 1.7481 0.0015
-6 7 3 1.3149 0.0012
-6 7 4 0.6483 0.0009
-6 7 5 -0.0698 0.0004
-6 7 6 -0.6447 -0.0003
-6 7 7 -0.9599 -0.0006
-6 7 8 -0.9721 -0.0003
-6 7 9 -0.7053 0.0002
-6 8 1 -1.4031 -0.0016
-6 8 2 -1.3633 -0.0015
-6 8 3 -1.0874 -0.0013
-6 8 4 -0.6095 -0.0010
-6 8 5 -0.0641 -0.0004
-6 8 6 0.3787 0.0003
-6 8 7 0.6079 0.0007
-6 8 8 0.5971 0.0004
-5 -12 1 -0.4534 -0.0000
-5 -11 1 0.8211 -0.0005
-5 -11 2 0.6432 -0.0006
-5 -11 3 0.4005 -0.0008
-5 -10 1 -1.0981 0.0014
-5 -10 2 -0.8253 0.0011
-5 -10 3 -0.4553 0.0008
-5 -10 4 -0.1857 0.0009
-5 -10 5 -0.0498 0.0009
-5 -9 1 1.3491 -0.0025
-5 -9 2 0.9877 -0.0017
-5 -9 3 0.4789 -0.0008
-5 -9 4 0.0884 -0.0004
-5 -9 5 -0.0950 -0.0004
-5 -9 6 -0.1525 -0.0004
-5 -8 1 -1.6996 0.0034
-5 -8 2 -1.2445 0.0023
-5 -8 3 -0.5969 0.0008
-5 -8 4 -0.0557 -0.0001
-5 -8 5 0.2396 -0.0002
-5 -8 6 0.3515 0.0001
-5 -8 7 0.3665 0.0004
-5 -8 8 0.2855 0.0008
-5 -7 1 2.0701 -0.0033
-5 -7 2 1.4806 -0.0023
-5 -7 3 0.7051 -0.0008
-5 -7 4 0.0284 0.0002
-5 -7 5 -0.3978 0.0005
-5 -7 6 -0.6127 0.0003
-5 -7 7 -0.6920 -0.0001
-5 -7 8 -0.6268 -0.0005
-5 -7 9 -0.4034 -0.0009
-5 -6 1 -2.3023 0.0023
-5 -6 2 -1.5088 0.0018
-5 -6 3 -0.6112 0.0007
-5 -6 4 0.1481 -0.0002
-5 -6 5 0.6495 -0.0005
-5 -6 6 0.9267 -0.0004
-5 -6 7 1.0430 -0.0002
-5 -6 8 0.9819 0.0000
-5 -6 9 0.7171 0.0003
-5 -5 1 2.4521 -0.0011
-5 -5 2 1.3920 -0.0010
-5 -5 3 0.3493 -0.0005
-5 -5 4 -0.4649 -0.0000
-5 -5 5 -0.9752 0.0002
-5 -5 6 -1.2258 0.0001
-5 -5 7 -1.2850 0.0001
-5 -5 8 -1.1591 0.0001
-5 -5 9 -0.8413 0.0000
-5 -5 10 -0.4250 -0.0002
-5 -4 1 -2.7116 0.0006
-5 -4 2 -1.3618 0.0006
-5 -4 3 -0.1236 0.0005
-5 -4 4 0.7815 0.0002
-5 -4 5 1.2954 0.0000
-5 -4 6 1.4675 0.0000
-5 -4 7 1.3866 -0.0000
-5 -4 8 1.1182 -0.0001
-5 -4 9 0.7182 -0.0002
-5 -4 10 0.2988 -0.0000
-5 -4 11 0.0116 0.0001
-5 -3 1 3.0697 -0.0010
-5 -3 2 1.4521 -0.0010
-5 -3 3 -0.0191 -0.0008
-5 -3 4 -1.0722 -0.0003
-5 -3 5 -1.6272 0.0001
-5 -3 6 -1.7232 0.0002
-5 -3 7 -1.4728 0.0002
-5 -3 8 -1.0150 0.0001
-5 -3 9 -0.4909 0.0001
-5 -3 10 -0.0550 0.0002
-5 -3 11 0.1583 0.0002
-5 -2 1 -3.2391 0.0012
-5 -2 2 -1.4129 0.0011
-5 -2 3 0.2648 0.0009
-5 -2 4 1.4642 0.0003
-5 -2 5 2.0661 -0.0002
-5 -2 6 2.0946 -0.0005
-5 -2 7 1.6837 -0.0003
-5 -2 8 1.0321 -0.0000
-5 -2 9 0.3494 0.0001
-5 -2 10 -0.1664 0.0001
-5 -2 11 -0.3717 -0.0001
-5 -2 12 -0.2721 -0.0004
-5 -1 1 2.9316 0.0001
-5 -1 2 0.9960 -0.0000
-5 -1 3 -0.7734 -0.0002
-5 -1 4 -2.0217 -0.0001
-5 -1 5 -2.6071 0.0003
-5 -1 6 -2.5504 0.0005
-5 -1 7 -2.0054 0.0003
-5 -1 8 -1.2023 -0.0002
-5 -1 9 -0.3746 -0.0005
-5 -1 10 0.2659 -0.0004
-5 -1 11 0.5525 -0.0001
-5 -1 12 0.4623 0.0002
-5 0 1 -2.1173 -0.0023
-5 0 2 -0.2100 -0.0019
-5 0 3 1.4749 -0.0010
-5 0 4 2.6152 -0.0003
-5 0 5 3.0831 -0.0001
-5 0 6 2.9094 -0.0002
-5 0 7 2.2621 -0.0001
-5 0 8 1.3795 0.0002
-5 0 9 0.4798 0.0004
-5 0 10 -0.2510 0.0004
-5 0 11 -0.6402 0.0001
-5 0 12 -0.6145 -0.0002
-5 1 1 1.0403 0.0034
-5 1 2 -0.7061 0.0029
-5 1 3 -2.1512 0.0016
-5 1 4 -3.0543 0.0004
-5 1 5 -3.3316 -0.0002
-5 1 6 -3.0223 -0.0002
-5 1 7 -2.2921 -0.0000
-5 1 8 -1.3781 0.0000
-5 1 9 -0.4804 -0.0000
-5 1 10 0.2563 -0.0000
-5 1 11 0.6838 0.0001
-5 1 12 0.7012 0.0003
-5 1 13 0.4045 0.0004
-5 2 1 -0.0496 -0.0026
-5 2 2 1.4761 -0.0022
-5 2 3 2.6362 -0.0011
-5 2 4 3.2817 0.0000
-5 2 5 3.3755 0.0006
-5 2 6 2.9467 0.0004
-5 2 7 2.1339 0.0001
-5 2 8 1.1738 -0.0002
-5 2 9 0.2818 -0.0001
-5 2 10 -0.4102 0.0000
-5 2 11 -0.7937 0.0001
-5 2 12 -0.7855 -0.0000
-5 2 13 -0.4636 -0.0001
-5 3 1 -0.6149 0.0013
-5 3 2 -1.9435 0.0012
-5 3 3 -2.8880 0.0005
-5 3 4 -3.3600 -0.0002
-5 3 5 -3.3483 -0.0005
-5 3 6 -2.8522 -0.0003
-5 3 7 -1.9629 -0.0000
-5 3 8 -0.9175 0.0000
-5 3 9 0.0169 -0.0001
-5 3 10 0.6743 -0.0003
-5 3 11 0.9753 -0.0003
-5 3 12 0.8891 -0.0002
-5 3 13 0.5138 -0.0000
-5 4 1 0.9564 -0.0013
-5 4 2 2.1198 -0.0012
-5 4 3 2.9271 -0.0007
-5 4 4 3.3058 -0.0002
-5 4 5 3.2503 0.0001
-5 4 6 2.7340 0.0001
-5 4 7 1.8039 -0.0000
-5 4 8 0.6908 0.0000
-5 4 9 -0.2852 0.0001
-5 4 10 -0.9079 0.0002
-5 4 11 -1.1151 -0.0000
-5 4 12 -0.9392 -0.0003
-5 5 1 -1.1800 0.0019
-5 5 2 -2.1611 0.0017
-5 5 3 -2.8220 0.0011
-5 5 4 -3.0813 0.0004
-5 5 5 -2.9423 0.0000
-5 5 6 -2.3917 -0.0000
-5 5 7 -1.4662 0.0000
-5 5 8 -0.3813 0.0001
-5 5 9 0.5326 0.0001
-5 5 10 1.0455 0.0003
-5 5 11 1.1256 0.0006
-5 5 12 0.8676 0.0010
-5 6 1 1.4860 -0.0017
-5 6 2 2.2657 -0.0015
-5 6 3 2.7244 -0.0008
-5 6 4 2.7709 -0.0001
-5 6 5 2.4416 0.0003
-5 6 6 1.7907 0.0003
-5 6 7 0.8934 0.0000
-5 6 8 -0.0551 -0.0001
-5 6 9 -0.7713 -0.0002
-5 6 10 -1.0738 -0.0004
-5 6 11 -0.9893 -0.0006
-5 6 12 -0.6681 -0.0008
-5 7 1 -1.8350 0.0011
-5 7 2 -2.4626 0.0008
-5 7 3 -2.7306 0.0002
-5 7 4 -2.5450 -0.0005
-5 7 5 -1.9913 -0.0007
-5 7 6 -1.2205 -0.0004
-5 7 7 -0.3725 0.0000
-5 7 8 0.3821 0.0002
-5 7 9 0.8452 0.0000
-5 7 10 0.9220 -0.0001
-5 7 11 0.7026 -0.0001
-5 8 1 1.9181 -0.0009
-5 8 2 2.4702 -0.0006
-5 8 3 2.6422 0.0000
-5 8 4 2.3400 0.0005
-5 8 5 1.6848 0.0005
-5 8 6 0.8992 -0.0000
-5 8 7 0.1681 -0.0005
-5 8 8 -0.3758 -0.0005
-5 8 9 -0.6283 -0.0001
-5 8 10 -0.5715 0.0003
-5 9 1 -1.4748 0.0016
-5 9 2 -1.9516 0.0010
-5 9 3 -2.1047 0.0003
-5 9 4 -1.8424 -0.0002
-5 9 5 -1.2843 -0.0001
-5 9 6 -0.6606 0.0005
-5 9 7 -0.1480 0.0010
-5 9 8 0.1761 0.0009
-5 10 3 1.1371 -0.0004
-5 10 4 0.9921 0.0002
-5 10 5 0.6538 0.0001
-4 -12 1 0.0365 -0.0002
-4 -12 2 0.1778 -0.0005
-4 -11 1 -0.2653 -0.0002
-4 -11 2 -0.4170 0.0001
-4 -11 3 -0.4459 0.0004
-4 -11 4 -0.4098 0.0003
-4 -10 1 0.5848 0.0009
-4 -10 2 0.7457 0.0006
-4 -10 3 0.7628 -0.0000
-4 -10 4 0.7338 -0.0003
-4 -10 5 0.6395 0.0000
-4 -9 1 -0.9095 -0.0016
-4 -9 2 -1.1036 -0.0013
-4 -9 3 -1.1027 -0.0006
-4 -9 4 -1.0455 0.0000
-4 -9 5 -0.9390 0.0002
-4 -9 6 -0.7174 -0.0001
-4 -9 7 -0.4018 -0.0001
-4 -8 1 1.3564 0.0014
-4 -8 2 1.5895 0.0014
-4 -8 3 1.5430 0.0009
-4 -8 4 1.3817 0.0003
-4 -8 5 1.1661 -0.0002
-4 -8 6 0.8586 -0.0003
-4 -8 7 0.4710 -0.0006
-4 -8 8 0.1244 -0.0013
-4 -7 1 -2.0055 -0.0003
-4 -7 2 -2.2353 -0.0005
-4 -7 3 -2.0955 -0.0005
-4 -7 4 -1.7537 -0.0003
-4 -7 5 -1.3231 0.0000
-4 -7 6 -0.8321 0.0002
-4 -7 7 -0.3227 0.0005
-4 -7 8 0.0856 0.0012
-4 -7 9 0.2695 0.0018
-4 -6 1 2.7204 -0.0004
-4 -6 2 2.8606 -0.0002
-4 -6 3 2.5740 0.0001
-4 -6 4 2.0225 0.0001
-4 -6 5 1.3497 0.0000
-4 -6 6 0.6484 0.0000
-4 -6 7 0.0018 -0.0000
-4 -6 8 -0.4683 -0.0004
-4 -6 9 -0.6467 -0.0010
-4 -6 10 -0.5297 -0.0013
-4 -5 1 -3.3893 -0.0006
-4 -5 2 -3.3391 -0.0005
-4 -5 3 -2.8376 -0.0004
-4 -5 4 -2.0685 -0.0001
-4 -5 5 -1.1974 0.0000
-4 -5 6 -0.3533 0.0000
-4 -5 7 0.3680 -0.0001
-4 -5 8 0.8669 -0.0001
-4 -5 9 1.0459 0.0003
-4 -5 10 0.8902 0.0008
-4 -5 11 0.5275 0.0009
-4 -4 1 4.1404 0.0024
-4 -4 2 3.8233 0.0018
-4 -4 3 3.0139 0.0010
-4 -4 4 1.9773 0.0003
-4 -4 5 0.9293 -0.0002
-4 -4 6 0.0171 -0.0003
-4 -4 7 -0.6933 -0.0001
-4 -4 8 -1.1668 0.0002
-4 -4 9 -1.3473 0.0001
-4 -4 10 -1.2019 -0.0003
-4 -4 11 -0.8106 -0.0007
-4 -3 1 -5.0919 -0.0025
-4 -3 2 -4.4831 -0.0017
-4 -3 3 -3.2813 -0.0008
-4 -3 4 -1.8914 -0.0000
-4 -3 5 -0.6273 0.0003
-4 -3 6 0.3390 0.0004
-4 -3 7 0.9936 0.0002
-4 -3 8 1.3933 -0.0001
-4 -3 9 1.5470 -0.0002
-4 -3 10 1.4184 -0.0001
-4 -3 11 1.0375 0.0002
-4 -3 12 0.5594 0.0002
-4 -2 1 6.0096 0.0008
-4 -2 2 5.1298 0.0001
-4 -2 3 3.5193 -0.0004
-4 -2 4 1.7411 -0.0005
-4 -2 5 0.2330 -0.0003
-4 -2 6 -0.7989 -0.0001
-4 -2 7 -1.3882 -0.0000
-4 -2 8 -1.6740 0.0001
-4 -2 9 -1.7308 0.0002
-4 -2 10 -1.5450 0.0003
-4 -2 11 -1.1369 0.0002
-4 -2 12 -0.6395 0.0002
-4 -1 1 -6.4203 0.0008
-4 -1 2 -5.3113 0.0012
-4 -1 3 -3.3749 0.0013
-4 -1 4 -1.2965 0.0008
-4 -1 5 0.3890 0.0001
-4 -1 6 1.4553 -0.0003
-4 -1 7 1.9705 -0.0002
-4 -1 8 2.1167 0.0000
-4 -1 9 2.0001 0.0001
-4 -1 10 1.6419 -0.0001
-4 -1 11 1.1078 -0.0002
-4 -1 12 0.5623 -0.0002
-4 -1 13 0.1714 -0.0002
-4 0 1 6.0405 -0.0006
-4 0 2 4.7668 -0.0010
-4 0 3 2.6764 -0.0011
-4 0 4 0.4990 -0.0006
-4 0 5 -1.2036 0.0001
-4 0 6 -2.2217 0.0005
-4 0 7 -2.6499 0.0003
-4 0 8 -2.6687 -0.0001
-4 0 9 -2.3651 -0.0003
-4 0 10 -1.7742 -0.0001
-4 0 11 -1.0353 0.0001
-4 0 12 -0.3959 0.0001
-4 0 13 -0.0344 0.0000
-4 1 1 -5.0037 -0.0003
-4 1 2 -3.6697 0.0001
-4 1 3 -1.6397 0.0005
-4 1 4 0.4039 0.0005
-4 1 5 1.9491 -0.0000
-4 1 6 2.8322 -0.0004
-4 1 7 3.1654 -0.0004
-4 1 8 3.1008 -0.0001
-4 1 9 2.6723 0.0001
-4 1 10 1.8959 0.0001
-4 1 11 0.9661 -0.0001
-4 1 12 0.2232 -0.0001
-4 1 13 -0.1161 0.0000
-4 2 1 3.7223 0.0003
-4 2 2 2.4419 -0.0001
-4 2 3 0.6396 -0.0006
-4 2 4 -1.1188 -0.0007
-4 2 5 -2.4153 -0.0003
-4 2 6 -3.1260 0.0002
-4 2 7 -3.3551 0.0004
-4 2 8 -3.2227 0.0002
-4 2 9 -2.7255 -0.0000
-4 2 10 -1.8574 -0.0001
-4 2 11 -0.8307 -0.0001
-4 2 12 -0.0395 -0.0001
-4 2 13 0.2667 -0.0002
-4 3 1 -2.6077 0.0006
-4 3 2 -1.4359 0.0008
-4 3 3 0.1034 0.0009
-4 3 4 1.5822 0.0008
-4 3 5 2.6721 0.0003
-4 3 6 3.2452 -0.0002
-4 3 7 3.3552 -0.0005
-4 3 8 3.0993 -0.0003
-4 3 9 2.4975 0.0001
-4 3 10 1.5719 0.0004
-4 3 11 0.5405 0.0005
-4 3 12 -0.2072 0.0003
-4 3 13 -0.4302 0.0002
-4 4 1 1.8561 -0.0010
-4 4 2 0.7776 -0.0009
-4 4 3 -0.5753 -0.0008
-4 4 4 -1.8876 -0.0004
-4 4 5 -2.8859 0.0000
-4 4 6 -3.3940 0.0004
-4 4 7 -3.3766 0.0005
-4 4 8 -2.9144 0.0003
-4 4 9 -2.1115 -0.0002
-4 4 10 -1.0897 -0.0004
-4 4 11 -0.0931 -0.0004
-4 4 12 0.5341 -0.0001
-4 4 13 0.6108 0.0004
-4 5 1 -1.3709 0.0006
-4 5 2 -0.3689 0.0005
-4 5 3 0.8611 0.0003
-4 5 4 2.0729 0.0000
-4 5 5 3.0251 -0.0002
-4 5 6 3.4929 -0.0004
-4 5 7 3.3532 -0.0004
-4 5 8 2.6667 -0.0002
-4 5 9 1.6343 0.0001
-4 5 10 0.5073 0.0002
-4 5 11 -0.4280 0.0001
-4 5 12 -0.8904 -0.0004
-4 5 13 -0.7888 -0.0009
-4 6 1 0.8683 -0.0002
-4 6 2 -0.0382 -0.0000
-4 6 3 -1.1158 0.0001
-4 6 4 -2.1542 0.0001
-4 6 5 -2.9570 0.0000
-4 6 6 -3.3102 0.0000
-4 6 7 -3.0536 0.0000
-4 6 8 -2.2252 -0.0000
-4 6 9 -1.0771 -0.0002
-4 6 10 0.0539 -0.0003
-4 6 11 0.8614 -0.0003
-4 6 12 1.1377 -0.0001
-4 6 13 0.8821 0.0004
-4 7 1 -0.1614 0.0003
-4 7 2 0.6398 -0.0001
-4 7 3 1.5037 -0.0002
-4 7 4 2.2418 -0.0001
-4 7 5 2.7363 0.0001
-4 7 6 2.8639 0.0003
-4 7 7 2.4997 0.0003
-4 7 8 1.6613 0.0003
-4 7 9 0.5833 0.0004
-4 7 10 -0.3955 0.0007
-4 7 11 -0.9985 0.0010
-4 7 12 -1.0997 0.0012
-4 8 1 -0.5827 -0.0007
-4 8 2 -1.3027 0.0000
-4 8 3 -1.9496 0.0004
-4 8 4 -2.3555 0.0003
-4 8 5 -2.4965 0.0001
-4 8 6 -2.3789 -0.0001
-4 8 7 -1.9546 -0.0001
-4 8 8 -1.2229 -0.0002
-4 8 9 -0.3516 -0.0004
-4 8 10 0.3831 -0.0007
-4 8 11 0.7672 -0.0012
-4 9 1 0.9447 0.0008
-4 9 2 1.5768 0.0001
-4 9 3 2.0463 -0.0005
-4 9 4 2.2102 -0.0006
-4 9 5 2.1164 -0.0005
-4 9 6 1.8720 -0.0003
-4 9 7 1.4911 -0.0002
-4 9 8 0.9486 -0.0002
-4 9 9 0.3305 -0.0002
-4 9 10 -0.1651 -0.0000
-4 10 1 -0.7219 -0.0006
-4 10 2 -1.1881 -0.0001
-4 10 3 -1.4945 0.0004
-4 10 4 -1.5318 0.0006
-4 10 5 -1.3769 0.0004
-4 10 6 -1.1686 0.0002
-4 10 7 -0.9379 0.0002
-4 10 8 -0.6289 0.0003
-4 10 9 -0.2582 0.0005
-3 -12 1 0.3114 0.0001
-3 -12 2 0.1580 0.0005
-3 -11 1 -0.2607 -0.0003
-3 -11 2 -0.1202 -0.0007
-3 -11 3 0.0507 -0.0008
-3 -11 4 0.2038 -0.0001
-3 -10 1 0.0276 -0.0001
-3 -10 2 -0.0904 0.0004
-3 -10 3 -0.2556 0.0007
-3 -10 4 -0.4492 0.0003
-3 -10 5 -0.5464 -0.0008
-3 -10 6 -0.4578 -0.0016
-3 -9 1 0.1902 0.0013
-3 -9 2 0.3312 0.0008
-3 -9 3 0.5113 -0.0001
-3 -9 4 0.7375 -0.0003
-3 -9 5 0.8919 0.0004
-3 -9 6 0.8414 0.0011
-3 -9 7 0.5779 0.0009
-3 -8 1 -0.3250 -0.0023
-3 -8 2 -0.5532 -0.0017
-3 -8 3 -0.7863 -0.0007
-3 -8 4 -1.0266 0.0001
-3 -8 5 -1.1934 -0.0000
-3 -8 6 -1.1690 -0.0004
-3 -8 7 -0.9076 -0.0000
-3 -8 8 -0.5032 0.0011
-3 -7 1 0.4332 0.0014
-3 -7 2 0.7964 0.0012
-3 -7 3 1.1164 0.0005
-3 -7 4 1.3439 -0.0000
-3 -7 5 1.4396 -0.0001
-3 -7 6 1.3605 0.0001
-3 -7 7 1.0793 -0.0002
-3 -7 8 0.6463 -0.0013
-3 -7 9 0.2168 -0.0023
-3 -6 1 -0.5079 0.0008
-3 -6 2 -1.0219 0.0004
-3 -6 3 -1.4514 0.0003
-3 -6 4 -1.6644 0.0002
-3 -6 5 -1.6400 -0.0001
-3 -6 6 -1.4330 -0.0004
-3 -6 7 -1.0815 -0.0003
-3 -6 8 -0.6169 0.0005
-3 -6 9 -0.1469 0.0015
-3 -6 10 0.1526 0.0018
-3 -5 1 0.5944 -0.0018
-3 -5 2 1.2242 -0.0011
-3 -5 3 1.7345 -0.0006
-3 -5 4 1.9313 -0.0002
-3 -5 5 1.7956 0.0002
-3 -5 6 1.4564 0.0005
-3 -5 7 1.0170 0.0006
-3 -5 8 0.5043 0.0002
-3 -5 9 -0.0144 -0.0005
-3 -5 10 -0.3675 -0.0010
-3 -5 11 -0.4161 -0.0008
-3 -4 1 -0.9830 0.0005
-3 -4 2 -1.6425 0.0001
-3 -4 3 -2.1096 -0.0001
-3 -4 4 -2.2094 -0.0002
-3 -4 5 -1.9481 -0.0001
-3 -4 6 -1.4938 -0.0002
-3 -4 7 -0.9726 -0.0003
-3 -4 8 -0.3927 -0.0003
-3 -4 9 0.2081 0.0001
-3 -4 10 0.6477 0.0005
-3 -4 11 0.7315 0.0006
-3 -4 12 0.4830 0.0004
-3 -3 1 1.9233 0.0011
-3 -3 2 2.5311 0.0012
-3 -3 3 2.7833 0.0009
-3 -3 4 2.6234 0.0004
-3 -3 5 2.1451 -0.0000
-3 -3 6 1.5456 -0.0002
-3 -3 7 0.9311 -0.0001
-3 -3 8 0.2658 0.0001
-3 -3 9 -0.4428 0.0001
-3 -3 10 -0.9936 -0.0001
-3 -3 11 -1.1298 -0.0004
-3 -3 12 -0.8245 -0.0004
-3 -2 1 -3.1494 -0.0014
-3 -2 2 -3.6893 -0.0012
-3 -2 3 -3.6271 -0.0007
-3 -2 4 -3.0825 -0.0002
-3 -2 5 -2.2934 0.0002
-3 -2 6 -1.5006 0.0004
-3 -2 7 -0.7798 0.0003
-3 -2 8 -0.0427 -0.0000
-3 -2 9 0.7399 -0.0003
-3 -2 10 1.3674 -0.0003
-3 -2 11 1.5442 -0.0001
-3 -2 12 1.1945 0.0001
-3 -2 13 0.5875 0.0000
-3 -1 1 3.9994 0.0009
-3 -1 2 4.4971 0.0006
-3 -1 3 4.1474 0.0003
-3 -1 4 3.2351 0.0001
-3 -1 5 2.1462 -0.0001
-3 -1 6 1.1738 -0.0002
-3 -1 7 0.3781 -0.0003
-3 -1 8 -0.3610 -0.0001
-3 -1 9 -1.1071 0.0002
-3 -1 10 -1.6969 0.0004
-3 -1 11 -1.8536 0.0003
-3 -1 12 -1.4797 0.0002
-3 -1 13 -0.8047 0.0001
-3 0 1 -4.0508 -0.0008
-3 0 2 -4.5008 -0.0004
-3 0 3 -3.9615 -0.0001
-3 0 4 -2.8199 -0.0001
-3 0 5 -1.5559 -0.0001
-3 0 6 -0.4924 0.0000
-3 0 7 0.3109 0.0002
-3 0 8 0.9696 0.0003
-3 0 9 1.5571 0.0001
-3 0 10 1.9675 -0.0002
-3 0 11 2.0043 -0.0004
-3 0 12 1.5997 -0.0003
-3 0 13 0.9334 -0.0001
-3 1 1 3.4330 0.0012
-3 1 2 3.7942 0.0006
-3 1 3 3.1723 0.0002
-3 1 4 1.9790 0.0001
-3 1 5 0.7057 0.0000
-3 1 6 -0.3394 -0.0000
-3 1 7 -1.0996 -0.0002
-3 1 8 -1.6563 -0.0003
-3 1 9 -2.0514 -0.0001
-3 1 10 -2.2140 0.0002
-3 1 11 -2.0485 0.0005
-3 1 12 -1.5680 0.0003
-3 1 13 -0.9330 0.0000
-3 1 14 -0.3720 -0.0002
-3 2 1 -2.5466 -0.0014
-3 2 2 -2.8075 -0.0008
-3 2 3 -2.2081 -0.0003
-3 2 4 -1.1188 0.0001
-3 2 5 0.0264 0.0002
-3 2 6 0.9708 0.0002
-3 2 7 1.6709 0.0002
-3 2 8 2.1685 0.0002
-3 2 9 2.4446 0.0000
-3 2 10 2.4135 -0.0003
-3 2 11 2.0468 -0.0004
-3 2 12 1.4536 -0.0001
-3 2 13 0.8236 0.0004
-3 2 14 0.3223 0.0007
-3 3 1 1.7240 0.0009
-3 3 2 1.9202 0.0006
-3 3 3 1.4226 0.0002
-3 3 4 0.5198 -0.0000
-3 3 5 -0.4406 -0.0002
-3 3 6 -1.2531 -0.0002
-3 3 7 -1.8848 -0.0002
-3 3 8 -2.3532 -0.0001
-3 3 9 -2.5903 0.0000
-3 3 10 -2.4711 0.0002
-3 3 11 -1.9821 0.0001
-3 3 12 -1.3002 -0.0003
-3 3 13 -0.6672 -0.0009
-3 3 14 -0.2256 -0.0011
-3 4 1 -1.1638 -0.0001
-3 4 2 -1.3228 -0.0000
-3 4 3 -0.9295 -0.0001
-3 4 4 -0.1830 -0.0001
-3 4 5 0.6426 0.0000
-3 4 6 1.3567 0.0001
-3 4 7 1.9085 0.0001
-3 4 8 2.3058 -0.0000
-3 4 9 2.4823 -0.0001
-3 4 10 2.3080 -0.0001
-3 4 11 1.7690 0.0001
-3 4 12 1.0683 0.0005
-3 4 13 0.4796 0.0009
-3 4 14 0.1320 0.0011
-3 5 1 0.9192 -0.0007
-3 5 2 1.0326 -0.0006
-3 5 3 0.6818 -0.0003
-3 5 4 -0.0029 -0.0000
-3 5 5 -0.7941 0.0000
-3 5 6 -1.4783 -0.0000
-3 5 7 -1.9483 0.0000
-3 5 8 -2.1965 0.0001
-3 5 9 -2.2056 0.0003
-3 5 10 -1.9107 0.0003
-3 5 11 -1.3307 0.0001
-3 5 12 -0.6733 -0.0003
-3 5 13 -0.2017 -0.0006
-3 5 14 -0.0068 -0.0006
-3 6 1 -0.8177 0.0010
-3 6 2 -0.8751 0.0009
-3 6 3 -0.5301 0.0006
-3 6 4 0.1275 0.0002
-3 6 5 0.9098 0.0000
-3 6 6 1.5854 -0.0000
-3 6 7 1.9785 -0.0000
-3 6 8 2.0439 -0.0002
-3 6 9 1.8181 -0.0003
-3 6 10 1.3438 -0.0003
-3 6 11 0.7142 0.0000
-3 6 12 0.1387 0.0005
-3 6 13 -0.1660 0.0007
-3 7 1 0.5511 -0.0007
-3 7 2 0.5561 -0.0007
-3 7 3 0.2461 -0.0004
-3 7 4 -0.3075 -0.0001
-3 7 5 -0.9781 0.0000
-3 7 6 -1.5699 0.0000
-3 7 7 -1.8743 0.0000
-3 7 8 -1.7948 0.0000
-3 7 9 -1.3854 0.0001
-3 7 10 -0.7793 -0.0000
-3 7 11 -0.1451 -0.0005
-3 7 12 0.3146 -0.0011
-3 7 13 0.4498 -0.0013
-3 8 1 -0.0107 0.0008
-3 8 2 0.0468 0.0006
-3 8 3 0.2883 0.0003
-3 8 4 0.6467 -0.0000
-3 8 5 1.0761 -0.0002
-3 8 6 1.4759 -0.0002
-3 8 7 1.6645 0.0000
-3 8 8 1.5072 0.0001
-3 8 9 1.0366 0.0000
-3 8 10 0.4226 0.0000
-3 8 11 -0.1299 0.0005
-3 8 12 -0.4487 0.0011
-3 9 1 -0.5147 -0.0017
-3 9 2 -0.6520 -0.0013
-3 9 3 -0.8436 -0.0007
-3 9 4 -1.0143 -0.0001
-3 9 5 -1.1857 0.0002
-3 9 6 -1.3653 0.0002
-3 9 7 -1.4378 -0.0001
-3 9 8 -1.2589 -0.0001
-3 9 9 -0.8277 0.0001
-3 9 10 -0.3072 0.0005
-3 9 11 0.1042 0.0004
-3 9 12 0.2877 -0.0001
-3 10 1 0.6258 0.0029
-3 10 2 0.8135 0.0024
-3 10 3 0.9866 0.0014
-3 10 4 1.0585 0.0004
-3 10 5 1.0776 -0.0002
-3 10 6 1.1181 -0.0001
-3 10 7 1.1271 0.0002
-3 10 8 0.9743 0.0003
-3 10 9 0.6351 -0.0001
-3 10 10 0.2485 -0.0008
-3 11 1 -0.3056 -0.0032
-3 11 2 -0.4624 -0.0027
-3 11 3 -0.6044 -0.0015
-3 11 4 -0.6465 -0.0003
-3 11 5 -0.6281 0.0003
-3 11 6 -0.6353 0.0001
-3 11 7 -0.6505 -0.0004
-3 11 8 -0.5661 -0.0007
-2 -12 1 -0.1549 0.0012
-2 -12 2 -0.1237 0.0010
-2 -11 1 0.0209 -0.0007
-2 -11 2 0.0579 -0.0005
-2 -11 3 0.0001 -0.0003
-2 -11 4 -0.0809 -0.0004
-2 -10 1 0.2935 0.0000
-2 -10 2 0.1473 -0.0002
-2 -10 3 0.1315 -0.0002
-2 -10 4 0.1938 0.0001
-2 -10 5 0.2275 0.0007
-2 -10 6 0.1761 0.0011
-2 -9 1 -0.6208 -0.0002
-2 -9 2 -0.3550 0.0002
-2 -9 3 -0.2485 0.0005
-2 -9 4 -0.2772 0.0004
-2 -9 5 -0.3371 -0.0003
-2 -9 6 -0.3352 -0.0009
-2 -9 7 -0.2373 -0.0007
-2 -8 1 0.8384 0.0013
-2 -8 2 0.4527 0.0005
-2 -8 3 0.2751 -0.0003
-2 -8 4 0.2805 -0.0006
-2 -8 5 0.3797 -0.0003
-2 -8 6 0.4711 0.0002
-2 -8 7 0.4632 0.0001
-2 -8 8 0.3240 -0.0006
-2 -7 1 -0.8965 -0.0018
-2 -7 2 -0.3967 -0.0009
-2 -7 3 -0.2012 0.0000
-2 -7 4 -0.2190 0.0006
-2 -7 5 -0.3496 0.0005
-2 -7 6 -0.5148 0.0002
-2 -7 7 -0.6070 0.0002
-2 -7 8 -0.5253 0.0009
-2 -7 9 -0.2971 0.0016
-2 -6 1 0.7106 0.0007
-2 -6 2 0.1203 0.0002
-2 -6 3 -0.0071 -0.0004
-2 -6 4 0.1067 -0.0006
-2 -6 5 0.2876 -0.0004
-2 -6 6 0.4844 0.0000
-2 -6 7 0.6314 0.0002
-2 -6 8 0.6038 -0.0003
-2 -6 9 0.3693 -0.0011
-2 -6 10 0.0893 -0.0012
-2 -5 1 -0.3425 0.0009
-2 -5 2 0.3367 0.0010
-2 -5 3 0.3466 0.0009
-2 -5 4 0.0492 0.0006
-2 -5 5 -0.2469 0.0002
-2 -5 6 -0.4757 -0.0003
-2 -5 7 -0.6371 -0.0006
-2 -5 8 -0.6376 -0.0003
-2 -5 9 -0.4077 0.0003
-2 -5 10 -0.0761 0.0005
-2 -5 11 0.1192 0.0002
-2 -4 1 0.2413 -0.0018
-2 -4 2 -0.6112 -0.0015
-2 -4 3 -0.6045 -0.0010
-2 -4 4 -0.1586 -0.0005
-2 -4 5 0.2753 -0.0001
-2 -4 6 0.5536 0.0003
-2 -4 7 0.7090 0.0006
-2 -4 8 0.7049 0.0005
-2 -4 9 0.4698 0.0001
-2 -4 10 0.0980 -0.0003
-2 -4 11 -0.1641 -0.0002
-2 -4 12 -0.1787 0.0002
-2 -3 1 -0.8493 0.0023
-2 -3 2 0.3017 0.0016
-2 -3 3 0.5065 0.0008
-2 -3 4 0.1057 0.0003
-2 -3 5 -0.3722 0.0001
-2 -3 6 -0.6709 -0.0001
-2 -3 7 -0.7951 -0.0003
-2 -3 8 -0.7492 -0.0003
-2 -3 9 -0.4830 -0.0001
-2 -3 10 -0.0716 0.0002
-2 -3 11 0.2424 0.0004
-2 -3 12 0.2816 0.0002
-2 -2 1 1.8512 -0.0028
-2 -2 2 0.4016 -0.0017
-2 -2 3 -0.1569 -0.0006
-2 -2 4 0.0166 -0.0001
-2 -2 5 0.4153 -0.0000
-2 -2 6 0.6892 -0.0001
-2 -2 7 0.7747 0.0000
-2 -2 8 0.6799 0.0002
-2 -2 9 0.3716 0.0002
-2 -2 10 -0.0863 -0.0001
-2 -2 11 -0.4517 -0.0004
-2 -2 12 -0.5056 -0.0004
-2 -2 13 -0.2939 -0.0002
-2 -1 1 -2.2500 0.0031
-2 -1 2 -0.7081 0.0016
-2 -1 3 0.0933 0.0003
-2 -1 4 0.1307 -0.0003
-2 -1 5 -0.1807 -0.0002
-2 -1 6 -0.4559 -0.0000
-2 -1 7 -0.5675 0.0000
-2 -1 8 -0.4979 -0.0001
-2 -1 9 -0.1997 -0.0001
-2 -1 10 0.2910 0.0001
-2 -1 11 0.7333 0.0003
-2 -1 12 0.8448 0.0003
-2 -1 13 0.5967 0.0001
-2 0 1 1.4261 -0.0028
-2 0 2 0.0676 -0.0013
-2 0 3 -0.7108 0.0001
-2 0 4 -0.7847 0.0007
-2 0 5 -0.4625 0.0005
-2 0 6 -0.1007 0.0002
-2 0 7 0.1503 -0.0000
-2 0 8 0.2384 -0.0000
-2 0 9 0.0682 -0.0001
-2 0 10 -0.3874 -0.0002
-2 0 11 -0.9089 -0.0002
-2 0 12 -1.1415 -0.0001
-2 0 13 -0.9363 0.0002
-2 0 14 -0.4975 0.0004
-2 1 1 0.1842 0.0022
-2 1 2 1.2103 0.0010
-2 1 3 1.7760 -0.0002
-2 1 4 1.7493 -0.0006
-2 1 5 1.3497 -0.0005
-2 1 6 0.8614 -0.0002
-2 1 7 0.4164 0.0000
-2 1 8 0.0899 0.0001
-2 1 9 0.0351 0.0002
-2 1 10 0.3588 0.0002
-2 1 11 0.8927 0.0002
-2 1 12 1.2406 -0.0000
-2 1 13 1.1333 -0.0003
-2 1 14 0.6850 -0.0006
-2 2 1 -1.6505 -0.0014
-2 2 2 -2.3477 -0.0006
-2 2 3 -2.6684 0.0002
-2 2 4 -2.5241 0.0004
-2 2 5 -2.0668 0.0002
-2 2 6 -1.4969 -0.0000
-2 2 7 -0.9131 -0.0000
-2 2 8 -0.4044 -0.0000
-2 2 9 -0.1558 -0.0001
-2 2 10 -0.3189 -0.0001
-2 2 11 -0.7767 -0.0001
-2 2 12 -1.1489 0.0001
-2 2 13 -1.1127 0.0003
-2 2 14 -0.7010 0.0004
-2 3 1 2.4657 0.0003
-2 3 2 2.8769 -0.0002
-2 3 3 2.9832 -0.0006
-2 3 4 2.7471 -0.0005
-2 3 5 2.2676 -0.0001
-2 3 6 1.6743 0.0001
-2 3 7 1.0528 0.0001
-2 3 8 0.5134 -0.0000
-2 3 9 0.2345 0.0000
-2 3 10 0.3357 0.0001
-2 3 11 0.7038 0.0000
-2 3 12 1.0129 -0.0000
-2 3 13 0.9795 -0.0000
-2 3 14 0.6111 0.0001
-2 4 1 -2.6915 0.0005
-2 4 2 -2.8399 0.0009
-2 4 3 -2.7570 0.0011
-2 4 4 -2.4449 0.0008
-2 4 5 -1.9559 0.0002
-2 4 6 -1.3672 -0.0002
-2 4 7 -0.7765 -0.0002
-2 4 8 -0.3325 -0.0001
-2 4 9 -0.1885 -0.0000
-2 4 10 -0.3717 0.0000
-2 4 11 -0.7134 0.0001
-2 4 12 -0.9417 0.0000
-2 4 13 -0.8733 -0.0002
-2 4 14 -0.5460 -0.0005
-2 5 1 2.5308 -0.0003
-2 5 2 2.4580 -0.0006
-2 5 3 2.2351 -0.0008
-2 5 4 1.8894 -0.0005
-2 5 5 1.4306 -0.0000
-2 5 6 0.8874 0.0004
-2 5 7 0.3640 0.0004
-2 5 8 0.0451 0.0002
-2 5 9 0.0667 -0.0000
-2 5 10 0.3690 -0.0003
-2 5 11 0.7174 -0.0004
-2 5 12 0.8816 -0.0003
-2 5 13 0.7844 0.0001
-2 5 14 0.5098 0.0005
-2 6 1 -2.1419 -0.0001
-2 6 2 -1.9262 0.0000
-2 6 3 -1.6411 0.0001
-2 6 4 -1.3292 0.0001
-2 6 5 -0.9708 -0.0001
-2 6 6 -0.5455 -0.0003
-2 6 7 -0.1269 -0.0003
-2 6 8 0.1046 -0.0002
-2 6 9 0.0199 0.0001
-2 6 10 -0.2948 0.0004
-2 6 11 -0.5945 0.0006
-2 6 12 -0.6960 0.0005
-2 6 13 -0.5969 0.0001
-2 6 14 -0.4000 -0.0004
-2 7 1 1.7595 -0.0008
-2 7 2 1.4760 -0.0005
-2 7 3 1.1741 -0.0002
-2 7 4 0.9078 -0.0001
-2 7 5 0.6588 -0.0001
-2 7 6 0.3797 -0.0001
-2 7 7 0.0854 0.0001
-2 7 8 -0.1016 0.0001
-2 7 9 -0.0687 -0.0000
-2 7 10 0.1318 -0.0003
-2 7 11 0.3165 -0.0004
-2 7 12 0.3630 -0.0003
-2 7 13 0.3003 0.0001
-2 7 14 0.2078 0.0004
-2 8 1 -1.6276 0.0025
-2 8 2 -1.3320 0.0017
-2 8 3 -1.0128 0.0008
-2 8 4 -0.7278 0.0004
-2 8 5 -0.4948 0.0003
-2 8 6 -0.2876 0.0003
-2 8 7 -0.0789 -0.0000
-2 8 8 0.0901 -0.0003
-2 8 9 0.1428 -0.0002
-2 8 10 0.0800 0.0001
-2 8 11 -0.0050 0.0004
-2 8 12 -0.0432 0.0003
-2 8 13 -0.0535 -0.0001
-2 9 1 1.7031 -0.0033
-2 9 2 1.4571 -0.0021
-2 9 3 1.1439 -0.0007
-2 9 4 0.8037 -0.0001
-2 9 5 0.4963 -0.0001
-2 9 6 0.2555 -0.0001
-2 9 7 0.0594 0.0002
-2 9 8 -0.1085 0.0004
-2 9 9 -0.2133 0.0002
-2 9 10 -0.2230 -0.0004
-2 9 11 -0.1637 -0.0008
-2 9 12 -0.0837 -0.0009
-2 10 1 -1.6170 0.0026
-2 10 2 -1.4800 0.0013
-2 10 3 -1.2524 0.0000
-2 10 4 -0.9296 -0.0006
-2 10 5 -0.5798 -0.0004
-2 10 6 -0.2909 -0.0003
-2 10 7 -0.0793 -0.0004
-2 10 8 0.0857 -0.0006
-2 10 9 0.1980 -0.0002
-2 10 10 0.2161 0.0005
-2 10 11 0.1374 0.0013
-2 11 1 1.0976 -0.0015
-2 11 2 1.0740 -0.0005
-2 11 3 0.9937 0.0004
-2 11 4 0.8005 0.0007
-2 11 5 0.5294 0.0004
-2 11 6 0.2798 0.0002
-2 11 7 0.1010 0.0004
-2 11 8 -0.0282 0.0007
-2 11 9 -0.1148 0.0005
-2 11 10 -0.1207 -0.0001
-2 12 2 -0.3895 0.0002
-2 12 3 -0.4246 -0.0002
-2 12 4 -0.3858 -0.0002
-2 12 5 -0.2644 0.0001
-2 12 6 -0.1335 0.0002
-2 12 7 -0.0466 -0.0002
-1 -12 1 -0.2313 -0.0000
-1 -12 2 -0.3093 -0.0003
-1 -11 1 0.5948 -0.0002
-1 -11 2 0.6680 0.0002
-1 -11 3 0.5938 0.0004
-1 -11 4 0.3946 0.0003
-1 -10 1 -1.1601 0.0010
-1 -10 2 -1.1560 0.0004
-1 -10 3 -1.0046 -0.0001
-1 -10 4 -0.7287 -0.0005
-1 -10 5 -0.4101 -0.0008
-1 -10 6 -0.1585 -0.0010
-1 -9 1 1.7854 -0.0015
-1 -9 2 1.6282 -0.0009
-1 -9 3 1.3285 -0.0003
-1 -9 4 0.9468 0.0002
-1 -9 5 0.5735 0.0006
-1 -9 6 0.3029 0.0009
-1 -9 7 0.1495 0.0008
-1 -8 1 -2.4710 0.0011
-1 -8 2 -2.0541 0.0007
-1 -8 3 -1.5178 0.0003
-1 -8 4 -0.9833 0.0000
-1 -8 5 -0.5640 -0.0002
-1 -8 6 -0.3345 -0.0004
-1 -8 7 -0.2522 -0.0003
-1 -8 8 -0.1944 0.0001
-1 -7 1 3.3186 -0.0000
-1 -7 2 2.5060 0.0001
-1 -7 3 1.6399 0.0002
-1 -7 4 0.8922 0.0001
-1 -7 5 0.3849 -0.0000
-1 -7 6 0.1772 -0.0000
-1 -7 7 0.1804 -0.0001
-1 -7 8 0.2003 -0.0004
-1 -7 9 0.1287 -0.0007
-1 -6 1 -4.2661 -0.0011
-1 -6 2 -2.9418 -0.0009
-1 -6 3 -1.6991 -0.0007
-1 -6 4 -0.7302 -0.0003
-1 -6 5 -0.1089 0.0001
-1 -6 6 0.1358 0.0002
-1 -6 7 0.0997 0.0001
-1 -6 8 0.0087 0.0002
-1 -6 9 0.0258 0.0004
-1 -6 10 0.1005 0.0004
-1 -5 1 5.1835 0.0020
-1 -5 2 3.2447 0.0016
-1 -5 3 1.6078 0.0011
-1 -5 4 0.4792 0.0005
-1 -5 5 -0.1970 -0.0001
-1 -5 6 -0.4818 -0.0002
-1 -5 7 -0.4567 0.0000
-1 -5 8 -0.3166 0.0002
-1 -5 9 -0.2573 0.0001
-1 -5 10 -0.2825 0.0001
-1 -5 11 -0.2498 0.0002
-1 -4 1 -6.2972 -0.0024
-1 -4 2 -3.5600 -0.0020
-1 -4 3 -1.4031 -0.0013
-1 -4 4 -0.1165 -0.0006
-1 -4 5 0.5372 0.0000
-1 -4 6 0.8046 0.0003
-1 -4 7 0.7843 0.0000
-1 -4 8 0.5965 -0.0002
-1 -4 9 0.4297 -0.0003
-1 -4 10 0.3651 -0.0002
-1 -4 11 0.3074 -0.0003
-1 -4 12 0.1706 -0.0006
-1 -3 1 8.0406 0.0014
-1 -3 2 4.2300 0.0014
-1 -3 3 1.2615 0.0011
-1 -3 4 -0.3530 0.0005
-1 -3 5 -1.0080 -0.0001
-1 -3 6 -1.2156 -0.0004
-1 -3 7 -1.1681 -0.0002
-1 -3 8 -0.9129 0.0002
-1 -3 9 -0.5966 0.0002
-1 -3 10 -0.3767 0.0001
-1 -3 11 -0.2487 0.0001
-1 -3 12 -0.1220 0.0003
-1 -2 1 -10.1281 0.0007
-1 -2 2 -5.0993 -0.0002
-1 -2 3 -1.0914 -0.0005
-1 -2 4 1.0449 -0.0002
-1 -2 5 1.7737 0.0002
-1 -2 6 1.8887 0.0004
-1 -2 7 1.7519 0.0002
-1 -2 8 1.3868 -0.0001
-1 -2 9 0.8880 -0.0002
-1 -2 10 0.4668 -0.0001
-1 -2 11 0.2153 0.0000
-1 -2 12 0.0624 -0.0001
-1 -2 13 -0.0434 -0.0002
-1 -1 1 11.1830 -0.0026
-1 -1 2 5.1920 -0.0007
-1 -1 3 0.3210 0.0004
-1 -1 4 -2.2542 0.0004
-1 -1 5 -2.9816 -0.0001
-1 -1 6 -2.8770 -0.0004
-1 -1 7 -2.5034 -0.0003
-1 -1 8 -1.9293 0.0001
-1 -1 9 -1.2261 0.0003
-1 -1 10 -0.6294 0.0002
-1 -1 11 -0.2830 0.0000
-1 -1 12 -0.1098 -0.0000
-1 -1 13 -0.0005 0.0000
-1 0 1 -9.8978 0.0034
-1 0 2 -3.5856 0.0010
-1 0 3 1.5381 -0.0006
-1 0 4 4.1371 -0.0008
-1 0 5 4.6038 -0.0002
-1 0 6 4.0623 0.0003
-1 0 7 3.2381 0.0003
-1 0 8 2.3012 0.0001
-1 0 9 1.3571 -0.0001
-1 0 10 0.6555 -0.0001
-1 0 11 0.3267 0.0000
-1 0 12 0.2206 0.0000
-1 0 13 0.1361 -0.0000
-1 0 14 0.0563 0.0000
-1 1 1 6.5061 -0.0038
-1 1 2 0.5684 -0.0015
-1 1 3 -4.1289 0.0003
-1 1 4 -6.3093 0.0006
-1 1 5 -6.3052 0.0001
-1 1 6 -5.2099 -0.0003
-1 1 7 -3.8147 -0.0002
-1 1 8 -2.4043 0.0000
-1 1 9 -1.1749 0.0001
-1 1 10 -0.4047 -0.0000
-1 1 11 -0.1764 -0.0001
-1 1 12 -0.2225 -0.0001
-1 1 13 -0.2184 0.0001
-1 1 14 -0.1119 0.0001
-1 2 1 -2.6502 0.0041
-1 2 2 2.4693 0.0022
-1 2 3 6.3558 0.0006
-1 2 4 7.9500 0.0000
-1 2 5 7.5186 0.0002
-1 2 6 6.0003 0.0002
-1 2 7 4.1421 -0.0001
-1 2 8 2.3143 -0.0003
-1 2 9 0.8194 -0.0002
-1 2 10 -0.0250 0.0001
-1 2 11 -0.1752 0.0002
-1 2 12 0.0107 0.0001
-1 2 13 0.1088 -0.0002
-1 2 14 0.0217 -0.0003
-1 3 1 -0.1821 -0.0029
-1 3 2 -4.3240 -0.0019
-1 3 3 -7.3353 -0.0007
-1 3 4 -8.4209 -0.0003
-1 3 5 -7.7693 -0.0003
-1 3 6 -6.0998 -0.0001
-1 3 7 -4.0502 0.0004
-1 3 8 -2.0344 0.0006
-1 3 9 -0.4245 0.0003
-1 3 10 0.4551 -0.0002
-1 3 11 0.5870 -0.0003
-1 3 12 0.3440 -0.0001
-1 3 13 0.1647 0.0004
-1 3 14 0.1770 0.0006
-1 3 15 0.2162 0.0005
-1 4 1 1.6950 0.0007
-1 4 2 4.8567 0.0005
-1 4 3 7.0613 0.0001
-1 4 4 7.7482 0.0001
-1 4 5 7.0251 0.0003
-1 4 6 5.4008 0.0000
-1 4 7 3.4055 -0.0005
-1 4 8 1.4718 -0.0006
-1 4 9 -0.0194 -0.0001
-1 4 10 -0.8063 0.0004
-1 4 11 -0.9169 0.0005
-1 4 12 -0.6755 0.0000
-1 4 13 -0.4414 -0.0005
-1 4 14 -0.3381 -0.0008
-1 4 15 -0.2678 -0.0007
-1 5 1 -2.3669 0.0005
-1 5 2 -4.6318 0.0002
-1 5 3 -6.1302 -0.0000
-1 5 4 -6.4845 -0.0002
-1 5 5 -5.7346 -0.0004
-1 5 6 -4.2251 -0.0001
-1 5 7 -2.4079 0.0002
-1 5 8 -0.7240 0.0003
-1 5 9 0.4797 -0.0001
-1 5 10 1.0541 -0.0006
-1 5 11 1.0986 -0.0005
-1 5 12 0.8696 0.0001
-1 5 13 0.5985 0.0008
-1 5 14 0.3756 0.0010
-1 5 15 0.1886 0.0008
-1 6 1 2.6051 -0.0001
-1 6 2 4.1359 0.0005
-1 6 3 5.0766 0.0008
-1 6 4 5.1884 0.0007
-1 6 5 4.4632 0.0005
-1 6 6 3.1182 0.0001
-1 6 7 1.5297 -0.0002
-1 6 8 0.1239 -0.0002
-1 6 9 -0.7937 0.0002
-1 6 10 -1.1682 0.0006
-1 6 11 -1.1533 0.0004
-1 6 12 -0.9419 -0.0003
-1 6 13 -0.6501 -0.0010
-1 6 14 -0.3380 -0.0012
-1 7 1 -2.5759 -0.0002
-1 7 2 -3.5706 -0.0009
-1 7 3 -4.1224 -0.0011
-1 7 4 -4.1019 -0.0008
-1 7 5 -3.4782 -0.0002
-1 7 6 -2.3631 0.0003
-1 7 7 -1.0307 0.0005
-1 7 8 0.1514 0.0002
-1 7 9 0.9089 -0.0003
-1 7 10 1.2078 -0.0006
-1 7 11 1.1924 -0.0004
-1 7 12 0.9985 0.0003
-1 7 13 0.6817 0.0009
-1 7 14 0.3072 0.0012
-1 8 1 2.4726 -0.0008
-1 8 2 3.0966 0.0001
-1 8 3 3.3730 0.0006
-1 8 4 3.2567 0.0003
-1 8 5 2.7280 -0.0004
-1 8 6 1.8319 -0.0008
-1 8 7 0.7331 -0.0006
-1 8 8 -0.2943 -0.0000
-1 8 9 -1.0026 0.0005
-1 8 10 -1.3172 0.0008
-1 8 11 -1.3172 0.0005
-1 8 12 -1.0961 0.0000
-1 8 13 -0.7145 -0.0005
-1 8 14 -0.2820 -0.0007
-1 9 1 -2.4830 0.0021
-1 9 2 -2.8638 0.0009
-1 9 3 -2.9268 -0.0001
-1 9 4 -2.6773 -0.0001
-1 9 5 -2.1343 0.0004
-1 9 6 -1.3399 0.0007
-1 9 7 -0.3937 0.0004
-1 9 8 0.5183 -0.0002
-1 9 9 1.1843 -0.0006
-1 9 10 1.4862 -0.0006
-1 9 11 1.4394 -0.0003
-1 9 12 1.1276 0.0001
-1 9 13 0.6603 0.0003
-1 10 1 2.4957 -0.0025
-1 10 2 2.7516 -0.0012
-1 10 3 2.6915 0.0001
-1 10 4 2.3226 0.0004
-1 10 5 1.7005 -0.0000
-1 10 6 0.9139 -0.0003
-1 10 7 0.0646 -0.0001
-1 10 8 -0.7148 0.0003
-1 10 9 -1.2630 0.0004
-1 10 10 -1.4635 0.0001
-1 10 11 -1.3145 -0.0004
-1 10 12 -0.9199 -0.0006
-1 11 1 -2.1473 0.0021
-1 11 2 -2.3672 0.0010
-1 11 3 -2.3105 -0.0003
-1 11 4 -1.9475 -0.0006
-1 11 5 -1.3373 -0.0001
-1 11 6 -0.6137 0.0003
-1 11 7 0.0897 0.0002
-1 11 8 0.6669 -0.0001
-1 11 9 1.0195 -0.0002
-1 11 10 1.0771 0.0002
-1 11 11 0.8582 0.0007
-1 12 1 1.3166 -0.0015
-1 12 2 1.5106 -0.0008
-1 12 3 1.5290 0.0001
-1 12 4 1.3040 0.0004
-1 12 5 0.8663 -0.0000
-1 12 6 0.3508 -0.0005
-1 12 7 -0.1020 -0.0004
-1 12 8 -0.4156 -0.0000
-1 12 9 -0.5574 0.0002
0 -12 1 -0.1353 0.0002
0 -11 1 -0.0648 0.0001
0 -11 2 -0.6114 -0.0002
0 -11 3 -0.8093 0.0000
0 -10 1 0.6323 -0.0007
0 -10 2 1.2887 -0.0001
0 -10 3 1.5425 0.0000
0 -10 4 1.3555 -0.0002
0 -10 5 0.8943 -0.0001
0 -9 1 -1.3753 0.0014
0 -9 2 -2.0511 0.0006
0 -9 3 -2.2825 0.0001
0 -9 4 -2.0429 0.0001
0 -9 5 -1.4978 0.0000
0 -9 6 -0.9127 -0.0004
0 -9 7 -0.4649 -0.0007
0 -8 1 2.2126 -0.0019
0 -8 2 2.8052 -0.0010
0 -8 3 2.9006 -0.0003
0 -8 4 2.5429 -0.0001
0 -8 5 1.9203 -0.0000
0 -8 6 1.2827 0.0002
0 -8 7 0.7759 0.0004
0 -8 8 0.4025 0.0000
0 -7 1 -3.3475 0.0024
0 -7 2 -3.7177 0.0014
0 -7 3 -3.5069 0.0003
0 -7 4 -2.8796 -0.0001
0 -7 5 -2.0742 -0.0001
0 -7 6 -1.3361 -0.0002
0 -7 7 -0.7792 -0.0002
0 -7 8 -0.3672 0.0001
0 -7 9 -0.0621 0.0006
0 -6 1 4.9732 -0.0027
0 -6 2 4.9719 -0.0017
0 -6 3 4.2784 -0.0005
0 -6 4 3.2101 0.0002
0 -6 5 2.0618 0.0002
0 -6 6 1.0889 0.0002
0 -6 7 0.4062 0.0002
0 -6 8 -0.0420 0.0000
0 -6 9 -0.3302 -0.0003
0 -6 10 -0.4231 -0.0004
0 -5 1 -7.0379 0.0018
0 -5 2 -6.5204 0.0013
0 -5 3 -5.2132 0.0005
0 -5 4 -3.6161 -0.0000
0 -5 5 -2.0483 -0.0001
0 -5 6 -0.7494 -0.0001
0 -5 7 0.1402 -0.0001
0 -5 8 0.6548 -0.0001
0 -5 9 0.9081 0.0001
0 -5 10 0.9210 0.0002
0 -5 11 0.6619 -0.0000
0 -4 1 9.5323 0.0002
0 -4 2 8.2724 -0.0001
0 -4 3 6.1825 -0.0001
0 -4 4 4.0095 -0.0000
0 -4 5 2.0497 -0.0000
0 -4 6 0.4457 -0.0001
0 -4 7 -0.6594 0.0000
0 -4 8 -1.2460 0.0001
0 -4 9 -1.4516 -0.0001
0 -4 10 -1.3886 -0.0001
0 -4 11 -1.0652 0.0001
0 -4 12 -0.5556 0.0004
0 -3 1 -12.7381 -0.0019
0 -3 2 -10.3446 -0.0009
0 -3 3 -7.1322 -0.0001
0 -3 4 -4.2168 0.0002
0 -3 5 -1.8631 0.0002
0 -3 6 -0.0196 0.0000
0 -3 7 1.2426 -0.0001
0 -3 8 1.8504 -0.0001
0 -3 9 1.9443 0.0001
0 -3 10 1.7505 0.0002
0 -3 11 1.3657 0.0000
0 -3 12 0.8294 -0.0004
0 -2 1 16.6296 0.0020
0 -2 2 12.6877 0.0009
0 -2 3 7.9445 -0.0002
0 -2 4 4.0158 -0.0006
0 -2 5 1.1903 -0.0004
0 -2 6 -0.8338 -0.0000
0 -2 7 -2.1517 0.0002
0 -2 8 -2.6804 0.0002
0 -2 9 -2.5516 -0.0001
0 -2 10 -2.1041 -0.0003
0 -2 11 -1.5656 -0.0001
0 -2 12 -0.9833 0.0003
0 -2 13 -0.4369 0.0006
0 -1 1 -20.0125 -0.0014
0 -1 2 -14.4349 -0.0010
0 -1 3 -8.0692 -0.0000
0 -1 4 -3.0596 0.0005
0 -1 5 0.2040 0.0004
0 -1 6 2.2600 0.0001
0 -1 7 3.4456 -0.0001
0 -1 8 3.7469 -0.0001
0 -1 9 3.2954 0.0000
0 -1 10 2.5051 0.0001
0 -1 11 1.7214 -0.0000
0 -1 12 1.0295 -0.0003
0 -1 13 0.4531 -0.0005
0 0 1 20.9511 0.0013
0 0 2 14.1969 0.0016
0 0 3 6.7131 0.0010
0 0 4 1.0188 0.0002
0 0 5 -2.3592 -0.0002
0 0 6 -4.1217 -0.0002
0 0 7 -4.8701 -0.0002
0 0 8 -4.7483 -0.0002
0 0 9 -3.9213 -0.0001
0 0 10 -2.8155 -0.0000
0 0 11 -1.8085 0.0002
0 0 12 -0.9930 0.0003
0 0 13 -0.3635 0.0003
0 0 14 -0.0090 -0.0000
0 1 0 -21.8636 0.0007
0 1 1 -18.5384 -0.0007
0 1 2 -11.4329 -0.0017
0 1 3 -3.7396 -0.0016
0 1 4 1.9385 -0.0008
0 1 5 4.9630 0.0000
0 1 6 6.0803 0.0004
0 1 7 6.1018 0.0004
0 1 8 5.3828 0.0004
0 1 9 4.1694 0.0002
0 1 10 2.8514 -0.0001
0 1 11 1.7333 -0.0002
0 1 12 0.8472 -0.0002
0 1 13 0.1604 0.0001
0 1 14 -0.2188 0.0006
0 2 0 17.4495 -0.0019
0 2 1 13.9441 -0.0007
0 2 2 7.2639 0.0007
0 2 3 0.1808 0.0011
0 2 4 -4.9120 0.0006
0 2 5 -7.3157 -0.0001
0 2 6 -7.6907 -0.0005
0 2 7 -6.9349 -0.0005
0 2 8 -5.5979 -0.0002
0 2 9 -4.0360 0.0000
0 2 10 -2.5923 0.0002
0 2 11 -1.4498 0.0002
0 2 12 -0.5475 0.0000
0 2 13 0.1726 -0.0004
0 2 14 0.5695 -0.0009
0 3 0 -12.6859 0.0023
0 3 1 -9.3238 0.0015
0 3 2 -3.5286 0.0001
0 3 3 2.5175 -0.0006
0 3 4 6.8129 -0.0004
0 3 5 8.6475 0.0002
0 3 6 8.4991 0.0004
0 3 7 7.2148 0.0002
0 3 8 5.4547 -0.0001
0 3 9 3.6639 -0.0003
0 3 10 2.1460 -0.0003
0 3 11 0.9897 -0.0002
0 3 12 0.0865 0.0001
0 3 13 -0.6158 0.0005
0 3 14 -0.9603 0.0009
0 3 15 -0.8105 0.0010
0 4 0 8.9293 -0.0005
0 4 1 5.9296 -0.0002
0 4 2 1.1771 0.0005
0 4 3 -3.7293 0.0009
0 4 4 -7.2288 0.0006
0 4 5 -8.6503 -0.0000
0 4 6 -8.2741 -0.0003
0 4 7 -6.8150 -0.0001
0 4 8 -4.9416 0.0002
0 4 9 -3.1157 0.0003
0 4 10 -1.5887 0.0002
0 4 11 -0.4072 0.0000
0 4 12 0.4956 -0.0002
0 4 13 1.1092 -0.0004
0 4 14 1.2881 -0.0006
0 4 15 0.9713 -0.0007
0 5 0 -6.1640 -0.0018
0 5 1 -3.6253 -0.0016
0 5 2 0.1065 -0.0015
0 5 3 3.9122 -0.0013
0 5 4 6.6372 -0.0007
0 5 5 7.7003 0.0000
0 5 6 7.2443 0.0003
0 5 7 5.8433 0.0001
0 5 8 4.1025 -0.0001
0 5 9 2.4219 -0.0002
0 5 10 0.9692 0.0000
0 5 11 -0.2198 0.0002
0 5 12 -1.1051 0.0003
0 5 13 -1.5685 0.0004
0 5 14 -1.4954 0.0004
0 5 15 -0.9641 0.0004
0 6 0 3.9757 0.0028
0 6 1 1.8840 0.0021
0 6 2 -0.9553 0.0013
0 6 3 -3.7839 0.0007
0 6 4 -5.7853 0.0002
0 6 5 -6.4984 -0.0003
0 6 6 -5.9939 -0.0004
0 6 7 -4.7258 -0.0002
0 6 8 -3.2039 0.0002
0 6 9 -1.7330 0.0002
0 6 10 -0.3950 -0.0000
0 6 11 0.7706 -0.0002
0 6 12 1.6082 -0.0002
0 6 13 1.8965 -0.0001
0 6 14 1.5649 -0.0001
0 6 15 0.8449 -0.0001
0 7 0 -2.2958 -0.0025
0 7 1 -0.5787 -0.0015
0 7 2 1.5553 -0.0004
0 7 3 3.6144 0.0002
0 7 4 5.0449 0.0004
0 7 5 5.4978 0.0004
0 7 6 4.9929 0.0002
0 7 7 3.8646 -0.0001
0 7 8 2.5184 -0.0004
0 7 9 1.1913 -0.0004
0 7 10 -0.0640 -0.0001
0 7 11 -1.1781 0.0000
0 7 12 -1.9184 -0.0000
0 7 13 -2.0230 -0.0002
0 7 14 -1.4878 -0.0003
0 8 0 1.1671 0.0020
0 8 1 -0.2467 0.0010
0 8 2 -1.8571 -0.0002
0 8 3 -3.3632 -0.0008
0 8 4 -4.4047 -0.0005
0 8 5 -4.7167 -0.0001
0 8 6 -4.2645 0.0002
0 8 7 -3.2546 0.0003
0 8 8 -1.9938 0.0004
0 8 9 -0.7064 0.0004
0 8 10 0.5027 0.0001
0 8 11 1.5057 -0.0001
0 8 12 2.0561 -0.0001
0 8 13 1.9453 0.0001
0 8 14 1.2678 0.0003
0 9 0 -0.3879 -0.0015
0 9 1 0.7821 -0.0007
0 9 2 2.0067 0.0005
0 9 3 3.1024 0.0009
0 9 4 3.8378 0.0005
0 9 5 4.0171 -0.0001
0 9 6 3.5752 -0.0003
0 9 7 2.6201 -0.0002
0 9 8 1.3842 -0.0001
0 9 9 0.1120 -0.0001
0 9 10 -1.0043 0.0000
0 9 11 -1.7854 0.0002
0 9 12 -2.0390 0.0004
0 9 13 -1.6861 0.0004
0 10 0 -0.2650 0.0009
0 10 1 -1.2493 0.0003
0 10 2 -2.1971 -0.0007
0 10 3 -2.9667 -0.0010
0 10 4 -3.3963 -0.0006
0 10 5 -3.3596 0.0001
0 10 6 -2.8215 0.0002
0 10 7 -1.8648 -0.0000
0 10 8 -0.6825 -0.0002
0 10 9 0.4748 -0.0001
0 10 10 1.3723 0.0000
0 10 11 1.8341 -0.0000
0 10 12 1.7693 -0.0003
0 10 13 1.2412 -0.0006
0 11 0 0.6984 -0.0004
0 11 1 1.5271 -0.0000
0 11 2 2.2828 0.0007
0 11 3 2.8140 0.0010
0 11 4 2.9804 0.0005
0 11 5 2.7194 -0.0002
0 11 6 2.0729 -0.0004
0 11 7 1.1618 -0.0001
0 11 8 0.1614 0.0002
0 11 9 -0.7202 0.0001
0 11 10 -1.2916 -0.0003
0 11 11 -1.4422 -0.0005
0 11 12 -1.1831 -0.0004
0 12 0 -0.6868 -0.0000
0 12 1 -1.3253 -0.0002
0 12 2 -1.9152 -0.0008
0 12 3 -2.2928 -0.0010
0 12 4 -2.3199 -0.0005
0 12 5 -1.9735 0.0003
0 12 6 -1.3615 0.0006
0 12 7 -0.6459 0.0003
0 12 8 0.0256 -0.0000
0 12 9 0.5311 0.0000
0 12 10 0.7788 0.0004
0 13 2 1.0870 0.0010
0 13 3 1.3467 0.0011
0 13 4 1.3529 0.0006
0 13 5 1.0932 -0.0002
0 13 6 0.6849 -0.0006
0 13 7 0.2820 -0.0005
1 -12 0 1.0186 0.0014
1 -11 0 -1.7046 -0.0020
1 -11 1 -1.0920 -0.0008
1 -11 2 -0.4230 0.0005
1 -11 3 0.1091 0.0008
1 -10 0 1.9396 0.0024
1 -10 1 1.1278 0.0010
1 -10 2 0.2062 -0.0004
1 -10 3 -0.5605 -0.0009
1 -10 4 -0.9317 -0.0005
1 -10 5 -0.8682 -0.0001
1 -9 0 -1.7857 -0.0022
1 -9 1 -0.8065 -0.0009
1 -9 2 0.3038 0.0005
1 -9 3 1.2530 0.0008
1 -9 4 1.7502 0.0003
1 -9 5 1.7091 -0.0002
1 -9 6 1.2892 -0.0001
1 -8 0 1.5465 0.0011
1 -8 1 0.3777 0.0002
1 -8 2 -0.8862 -0.0008
1 -8 3 -1.9660 -0.0009
1 -8 4 -2.5663 -0.0002
1 -8 5 -2.5745 0.0004
1 -8 6 -2.1210 0.0005
1 -8 7 -1.4470 0.0003
1 -8 8 -0.7673 0.0003
1 -7 0 -1.3011 -0.0002
1 -7 1 0.1106 0.0002
1 -7 2 1.4995 0.0009
1 -7 3 2.6248 0.0010
1 -7 4 3.2283 0.0004
1 -7 5 3.2110 -0.0003
1 -7 6 2.7014 -0.0004
1 -7 7 1.9299 -0.0002
1 -7 8 1.0993 -0.0003
1 -7 9 0.3897 -0.0006
1 -6 0 0.8358 0.0006
1 -6 1 -0.8802 0.0005
1 -6 2 -2.3533 -0.0002
1 -6 3 -3.4009 -0.0006
1 -6 4 -3.8348 -0.0004
1 -6 5 -3.6080 0.0000
1 -6 6 -2.8980 0.0001
1 -6 7 -1.9733 -0.0001
1 -6 8 -1.0343 -0.0000
1 -6 9 -0.2367 0.0002
1 -6 10 0.2406 0.0002
1 -5 0 0.0492 -0.0010
1 -5 1 2.1213 -0.0012
1 -5 2 3.6328 -0.0008
1 -5 3 4.4968 -0.0002
1 -5 4 4.6197 0.0001
1 -5 5 4.0148 -0.0000
1 -5 6 2.9348 -0.0001
1 -5 7 1.7400 0.0001
1 -5 8 0.6656 0.0001
1 -5 9 -0.1784 0.0001
1 -5 10 -0.6581 0.0001
1 -5 11 -0.6589 0.0003
1 -4 0 -1.4626 -0.0003
1 -4 1 -3.8730 0.0005
1 -4 2 -5.3301 0.0009
1 -4 3 -5.9169 0.0007
1 -4 4 -5.6684 0.0002
1 -4 5 -4.6312 0.0001
1 -4 6 -3.1011 0.0001
1 -4 7 -1.5446 0.0001
1 -4 8 -0.2717 0.0000
1 -4 9 0.6488 -0.0000
1 -4 10 1.1656 -0.0001
1 -4 11 1.1639 -0.0004
1 -3 0 3.6978 0.0028
1 -3 1 6.2872 0.0013
1 -3 2 7.4485 -0.0003
1 -3 3 7.5491 -0.0008
1 -3 4 6.8270 -0.0005
1 -3 5 5.3423 0.0000
1 -3 6 3.3630 0.0002
1 -3 7 1.4245 0.0001
1 -3 8 -0.0710 -0.0000
1 -3 9 -1.0813 -0.0001
1 -3 10 -1.6657 -0.0001
1 -3 11 -1.7385 0.0002
1 -3 12 -1.2624 0.0006
1 -2 0 -7.1278 -0.0044
1 -2 1 -9.6175 -0.0026
1 -2 2 -10.0896 -0.0002
1 -2 3 -9.3112 0.0012
1 -2 4 -7.8450 0.0010
1 -2 5 -5.8043 0.0001
1 -2 6 -3.3756 -0.0005
1 -2 7 -1.0926 -0.0004
1 -2 8 0.5715 -0.0001
1 -2 9 1.5927 0.0001
1 -2 10 2.1651 0.0002
1 -2 11 2.2887 -0.0000
1 -2 12 1.8522 -0.0004
1 -2 13 1.0274 -0.0006
1 -1 0 11.3748 0.0048
1 -1 1 13.5068 0.0032
1 -1 2 12.9554 0.0004
1 -1 3 10.9216 -0.0015
1 -1 4 8.4024 -0.0015
1 -1 5 5.6634 -0.0003
1 -1 6 2.8087 0.0007
1 -1 7 0.2885 0.0007
1 -1 8 -1.4172 0.0003
1 -1 9 -2.3058 -0.0002
1 -1 10 -2.7053 -0.0003
1 -1 11 -2.7485 -0.0001
1 -1 12 -2.3122 0.0003
1 -1 13 -1.4520 0.0006
1 0 0 -14.8506 -0.0047
1 0 1 -16.5180 -0.0037
1 0 2 -14.9379 -0.0011
1 0 3 -11.6289 0.0010
1 0 4 -8.0276 0.0013
1 0 5 -4.6477 0.0002
1 0 6 -1.5523 -0.0008
1 0 7 0.9674 -0.0008
1 0 8 2.5244 -0.0003
1 0 9 3.1524 0.0002
1 0 10 3.2589 0.0004
1 0 11 3.0890 0.0001
1 0 12 2.5576 -0.0002
1 0 13 1.6584 -0.0005
1 0 14 0.7353 -0.0005
1 1 0 15.8194 0.0039
1 1 1 17.0669 0.0035
1 1 2 14.8250 0.0016
1 1 3 10.6821 -0.0003
1 1 4 6.3751 -0.0007
1 1 5 2.6970 0.0000
1 1 6 -0.2704 0.0008
1 1 7 -2.4414 0.0007
1 1 8 -3.6277 0.0001
1 1 9 -3.9238 -0.0003
1 1 10 -3.7270 -0.0004
1 1 11 -3.2979 -0.0001
1 1 12 -2.5862 0.0001
1 1 13 -1.5917 0.0002
1 1 14 -0.6398 0.0002
1 2 0 -14.0766 -0.0016
1 2 1 -15.0027 -0.0017
1 2 2 -12.5975 -0.0009
1 2 3 -8.2536 0.0002
1 2 4 -3.7818 0.0005
1 2 5 -0.2116 -0.0000
1 2 6 2.2943 -0.0005
1 2 7 3.8410 -0.0004
1 2 8 4.4988 0.0000
1 2 9 4.4513 0.0003
1 2 10 4.0144 0.0003
1 2 11 3.3601 0.0001
1 2 12 2.4380 -0.0000
1 2 13 1.2998 0.0001
1 2 14 0.3100 0.0002
1 3 0 11.1203 -0.0011
1 3 1 11.7961 -0.0007
1 3 2 9.5791 -0.0005
1 3 3 5.5065 -0.0006
1 3 4 1.2555 -0.0004
1 3 5 -2.0009 -0.0001
1 3 6 -3.9734 0.0002
1 3 7 -4.8796 0.0002
1 3 8 -5.0232 -0.0001
1 3 9 -4.6822 -0.0002
1 3 10 -4.0743 -0.0000
1 3 11 -3.2492 0.0002
1 3 12 -2.1473 0.0001
1 3 13 -0.8918 -0.0002
1 3 14 0.1005 -0.0004
1 3 15 0.4658 -0.0004
1 4 0 -8.5445 0.0024
1 4 1 -8.9935 0.0019
1 4 2 -7.0848 0.0011
1 4 3 -3.4941 0.0005
1 4 4 0.3611 0.0001
1 4 5 3.2862 -0.0001
1 4 6 4.8713 -0.0001
1 4 7 5.3512 0.0000
1 4 8 5.1598 0.0002
1 4 9 4.6276 0.0001
1 4 10 3.8916 -0.0002
1 4 11 2.9256 -0.0004
1 4 12 1.7059 -0.0002
1 4 13 0.4374 0.0002
1 4 14 -0.4494 0.0005
1 4 15 -0.6548 0.0005
1 5 0 6.7269 -0.0021
1 5 1 6.9387 -0.0017
1 5 2 5.3165 -0.0008
1 5 3 2.2739 0.0001
1 5 4 -1.0731 0.0005
1 5 5 -3.6395 0.0004
1 5 6 -4.9695 0.0001
1 5 7 -5.2574 -0.0002
1 5 8 -4.9422 -0.0003
1 5 9 -4.3267 -0.0002
1 5 10 -3.4794 0.0002
1 5 11 -2.3725 0.0004
1 5 12 -1.0875 0.0002
1 5 13 0.0764 -0.0004
1 5 14 0.7297 -0.0008
1 5 15 0.7120 -0.0009
1 6 0 -5.2167 0.0012
1 6 1 -5.1763 0.0011
1 6 2 -3.7818 0.0005
1 6 3 -1.3026 -0.0003
1 6 4 1.4307 -0.0007
1 6 5 3.5429 -0.0004
1 6 6 4.6286 0.0001
1 6 7 4.8330 0.0004
1 6 8 4.5116 0.0005
1 6 9 3.8701 0.0002
1 6 10 2.9137 -0.0001
1 6 11 1.6623 -0.0003
1 6 12 0.3438 -0.0001
1 6 13 -0.6459 0.0005
1 6 14 -0.9931 0.0012
1 6 15 -0.7206 0.0013
1 7 0 3.7810 -0.0001
1 7 1 3.5122 -0.0004
1 7 2 2.2949 -0.0002
1 7 3 0.3308 0.0003
1 7 4 -1.7850 0.0005
1 7 5 -3.4109 0.0003
1 7 6 -4.2386 -0.0002
1 7 7 -4.3685 -0.0005
1 7 8 -4.0439 -0.0004
1 7 9 -3.3666 -0.0000
1 7 10 -2.3053 0.0003
1 7 11 -0.9458 0.0005
1 7 12 0.3576 0.0003
1 7 13 1.1469 -0.0003
1 7 14 1.1975 -0.0010
1 8 0 -2.5869 -0.0010
1 8 1 -2.1713 -0.0005
1 8 2 -1.1035 -0.0001
1 8 3 0.4575 -0.0002
1 8 4 2.0877 -0.0003
1 8 5 3.3280 -0.0001
1 8 6 3.9431 0.0002
1 8 7 3.9805 0.0003
1 8 8 3.5911 0.0001
1 8 9 2.8315 -0.0003
1 8 10 1.6954 -0.0005
1 8 11 0.3341 -0.0006
1 8 12 -0.8463 -0.0004
1 8 13 -1.4057 0.0000
1 8 14 -1.2208 0.0005
1 9 0 1.7046 0.0015
1 9 1 1.2415 0.0008
1 9 2 0.3176 0.0002
1 9 3 -0.9470 0.0000
1 9 4 -2.2403 0.0001
1 9 5 -3.2140 0.0000
1 9 6 -3.6607 -0.0002
1 9 7 -3.5735 -0.0002
1 9 8 -3.0536 0.0000
1 9 9 -2.1871 0.0003
1 9 10 -1.0518 0.0003
1 9 11 0.1528 0.0001
1 9 12 1.0631 -0.0001
1 9 13 1.3518 -0.0003
1 9 14 1.0087 -0.0004
1 10 0 -0.9804 -0.0011
1 10 1 -0.5275 -0.0007
1 10 2 0.2542 -0.0001
1 10 3 1.2713 0.0001
1 10 4 2.2814 -0.0001
1 10 5 3.0068 -0.0001
1 10 6 3.2625 0.0002
1 10 7 3.0156 0.0003
1 10 8 2.3592 0.0002
1 10 9 1.4408 0.0001
1 10 10 0.4249 0.0002
1 10 11 -0.4795 0.0006
1 10 12 -1.0231 0.0010
1 10 13 -1.0447 0.0010
1 11 0 0.3667 0.0006
1 11 1 -0.0597 0.0005
1 11 2 -0.7077 0.0002
1 11 3 -1.4879 0.0002
1 11 4 -2.2029 0.0004
1 11 5 -2.6429 0.0003
1 11 6 -2.6779 -0.0000
1 11 7 -2.2968 -0.0004
1 11 8 -1.6030 -0.0005
1 11 9 -0.7739 -0.0005
1 11 10 -0.0014 -0.0006
1 11 11 0.5476 -0.0009
1 11 12 0.7558 -0.0012
1 12 0 -0.0112 -0.0004
1 12 1 0.3598 -0.0005
1 12 2 0.8686 -0.0005
1 12 3 1.4209 -0.0005
1 12 4 1.8560 -0.0006
1 12 5 2.0362 -0.0005
1 12 6 1.9096 -0.0001
1 12 7 1.5119 0.0005
1 12 8 0.9464 0.0007
1 12 9 0.3596 0.0006
1 12 10 -0.1044 0.0005
1 12 11 -0.3532 0.0004
1 13 1 -0.2874 0.0005
1 13 2 -0.6252 0.0004
1 13 3 -0.9652 0.0003
1 13 4 -1.1890 0.0003
1 13 5 -1.2184 0.0002
1 13 6 -1.0605 -0.0001
1 13 7 -0.7806 -0.0004
1 13 8 -0.4583 -0.0006
2 -11 0 1.0971 0.0018
2 -11 1 1.0067 0.0013
2 -11 2 0.7571 0.0005
2 -10 0 -1.6559 -0.0028
2 -10 1 -1.5067 -0.0019
2 -10 2 -1.0962 -0.0007
2 -10 3 -0.5206 0.0002
2 -10 4 -0.0197 0.0006
2 -9 0 1.8140 0.0034
2 -9 1 1.6533 0.0023
2 -9 2 1.1291 0.0009
2 -9 3 0.3629 -0.0000
2 -9 4 -0.3333 -0.0003
2 -9 5 -0.6888 -0.0004
2 -9 6 -0.6619 -0.0004
2 -8 0 -1.7791 -0.0026
2 -8 1 -1.6010 -0.0016
2 -8 2 -0.9784 -0.0005
2 -8 3 -0.0446 0.0000
2 -8 4 0.8415 -0.0000
2 -8 5 1.3477 -0.0001
2 -8 6 1.3813 -0.0001
2 -8 7 1.0708 -0.0001
2 -7 0 1.8793 0.0008
2 -7 1 1.6251 0.0002
2 -7 2 0.8760 -0.0004
2 -7 3 -0.2179 -0.0004
2 -7 4 -1.2690 0.0000
2 -7 5 -1.9217 0.0003
2 -7 6 -2.0645 0.0002
2 -7 7 -1.7921 0.0000
2 -7 8 -1.2639 0.0001
2 -6 0 -2.1529 0.0002
2 -6 1 -1.7588 0.0006
2 -6 2 -0.8554 0.0008
2 -6 3 0.3777 0.0007
2 -6 4 1.5257 0.0002
2 -6 5 2.2394 -0.0002
2 -6 6 2.4446 -0.0001
2 -6 7 2.2462 0.0002
2 -6 8 1.7469 0.0002
2 -6 9 1.0579 0.0001
2 -5 0 2.3614 0.0001
2 -5 1 1.7842 -0.0002
2 -5 2 0.7131 -0.0005
2 -5 3 -0.6423 -0.0006
2 -5 4 -1.8252 -0.0003
2 -5 5 -2.4845 0.0001
2 -5 6 -2.6189 0.0002
2 -5 7 -2.4126 -0.0001
2 -5 8 -1.9553 -0.0002
2 -5 9 -1.2673 -0.0002
2 -5 10 -0.5171 -0.0002
2 -4 0 -2.2912 -0.0003
2 -4 1 -1.5154 -0.0002
2 -4 2 -0.2705 0.0002
2 -4 3 1.2286 0.0006
2 -4 4 2.4600 0.0005
2 -4 5 3.0160 0.0001
2 -4 6 2.9464 -0.0003
2 -4 7 2.5662 -0.0003
2 -4 8 2.0323 -0.0001
2 -4 9 1.3069 0.0001
2 -4 10 0.4842 0.0002
2 -4 11 -0.1108 0.0002
2 -3 0 1.8270 -0.0004
2 -3 1 0.8851 -0.0001
2 -3 2 -0.4974 -0.0002
2 -3 3 -2.1461 -0.0006
2 -3 4 -3.4715 -0.0009
2 -3 5 -3.9435 -0.0005
2 -3 6 -3.5967 0.0002
2 -3 7 -2.8848 0.0005
2 -3 8 -2.1082 0.0004
2 -3 9 -1.2345 0.0000
2 -3 10 -0.2829 -0.0002
2 -3 11 0.4219 -0.0003
2 -3 12 0.5685 -0.0002
2 -2 0 -0.7842 0.0014
2 -2 1 0.2490 0.0007
2 -2 2 1.6408 0.0001
2 -2 3 3.3133 0.0003
2 -2 4 4.6613 0.0008
2 -2 5 5.0227 0.0008
2 -2 6 4.3592 0.0000
2 -2 7 3.2320 -0.0005
2 -2 8 2.1194 -0.0005
2 -2 9 1.0429 -0.0001
2 -2 10 -0.0564 0.0003
2 -2 11 -0.8958 0.0003
2 -2 12 -1.0868 0.0002
2 -1 0 -0.9382 -0.0023
2 -1 1 -2.0119 -0.0012
2 -1 2 -3.2354 0.0001
2 -1 3 -4.6648 0.0004
2 -1 4 -5.7880 -0.0002
2 -1 5 -5.8968 -0.0005
2 -1 6 -4.8750 -0.0001
2 -1 7 -3.3358 0.0005
2 -1 8 -1.9103 0.0006
2 -1 9 -0.6877 0.0001
2 -1 10 0.4814 -0.0003
2 -1 11 1.4149 -0.0003
2 -1 12 1.6849 -0.0001
2 -1 13 1.2117 0.0002
2 0 0 2.8589 0.0031
2 0 1 4.0064 0.0018
2 0 2 4.9676 -0.0001
2 0 3 5.9124 -0.0009
2 0 4 6.5380 -0.0004
2 0 5 6.2400 0.0003
2 0 6 4.8700 0.0003
2 0 7 3.0195 -0.0003
2 0 8 1.3923 -0.0005
2 0 9 0.1348 -0.0002
2 0 10 -0.9784 0.0002
2 0 11 -1.8997 0.0002
2 0 12 -2.2245 -0.0000
2 0 13 -1.7652 -0.0003
2 0 14 -0.8990 -0.0005
2 1 0 -3.9707 -0.0035
2 1 1 -5.2737 -0.0023
2 1 2 -6.0358 -0.0003
2 1 3 -6.4539 0.0009
2 1 4 -6.4893 0.0006
2 1 5 -5.7815 -0.0002
2 1 6 -4.2103 -0.0005
2 1 7 -2.2629 -0.0001
2 1 8 -0.5979 0.0002
2 1 9 0.5999 0.0001
2 1 10 1.5651 -0.0001
2 1 11 2.3500 -0.0001
2 1 12 2.6245 0.0002
2 1 13 2.1583 0.0004
2 1 14 1.2377 0.0003
2 2 0 3.7053 0.0032
2 2 1 5.1908 0.0022
2 2 2 5.8952 0.0004
2 2 3 5.9276 -0.0009
2 2 4 5.4832 -0.0008
2 2 5 4.5168 0.0001
2 2 6 2.9881 0.0006
2 2 7 1.2143 0.0003
2 2 8 -0.3099 -0.0001
2 2 9 -1.3919 -0.0002
2 2 10 -2.1869 -0.0000
2 2 11 -2.7555 -0.0000
2 2 12 -2.8517 -0.0002
2 2 13 -2.2881 -0.0003
2 2 14 -1.3176 -0.0001
2 3 0 -2.6317 -0.0024
2 3 1 -4.2173 -0.0016
2 3 2 -4.9392 -0.0002
2 3 3 -4.7456 0.0009
2 3 4 -3.9798 0.0010
2 3 5 -2.9008 0.0002
2 3 6 -1.5843 -0.0003
2 3 7 -0.1663 -0.0003
2 3 8 1.0932 0.0001
2 3 9 2.0364 0.0003
2 3 10 2.6915 0.0002
2 3 11 3.0437 0.0001
2 3 12 2.9079 0.0001
2 3 13 2.1917 0.0000
2 3 14 1.1730 -0.0003
2 4 0 1.8126 0.0017
2 4 1 3.3422 0.0010
2 4 2 4.0357 0.0000
2 4 3 3.6908 -0.0008
2 4 4 2.7025 -0.0009
2 4 5 1.5522 -0.0004
2 4 6 0.4407 0.0001
2 4 7 -0.6241 0.0002
2 4 8 -1.6040 -0.0001
2 4 9 -2.4073 -0.0002
2 4 10 -2.9548 -0.0001
2 4 11 -3.1403 0.0001
2 4 12 -2.8201 0.0002
2 4 13 -1.9970 0.0004
2 4 14 -0.9809 0.0007
2 4 15 -0.2148 0.0009
2 5 0 -1.6477 -0.0005
2 5 1 -2.9614 -0.0001
2 5 2 -3.5227 0.0003
2 5 3 -3.0577 0.0006
2 5 4 -1.9349 0.0005
2 5 5 -0.7269 0.0002
2 5 6 0.2769 -0.0002
2 5 7 1.1157 -0.0003
2 5 8 1.8836 -0.0001
2 5 9 2.5462 0.0001
2 5 10 2.9718 0.0000
2 5 11 3.0145 -0.0002
2 5 12 2.5835 -0.0003
2 5 13 1.7543 -0.0005
2 5 14 0.8291 -0.0007
2 5 15 0.1757 -0.0008
2 6 0 1.7282 -0.0011
2 6 1 2.7157 -0.0012
2 6 2 3.0704 -0.0009
2 6 3 2.5422 -0.0005
2 6 4 1.4267 -0.0002
2 6 5 0.2482 0.0001
2 6 6 -0.6908 0.0003
2 6 7 -1.4181 0.0003
2 6 8 -2.0473 0.0000
2 6 9 -2.5547 -0.0002
2 6 10 -2.7994 -0.0002
2 6 11 -2.6645 -0.0000
2 6 12 -2.1464 0.0001
2 6 13 -1.3821 0.0000
2 6 14 -0.6269 -0.0000
2 6 15 -0.1331 0.0000
2 7 0 -1.6254 0.0022
2 7 1 -2.2592 0.0019
2 7 2 -2.3965 0.0011
2 7 3 -1.8747 0.0003
2 7 4 -0.9070 -0.0002
2 7 5 0.1189 -0.0003
2 7 6 0.9597 -0.0002
2 7 7 1.6122 -0.0001
2 7 8 2.1349 0.0001
2 7 9 2.4716 0.0003
2 7 10 2.4905 0.0004
2 7 11 2.1414 0.0002
2 7 12 1.5265 0.0002
2 7 13 0.8439 0.0004
2 7 14 0.2955 0.0006
2 8 0 1.3215 -0.0016
2 8 1 1.6619 -0.0013
2 8 2 1.6230 -0.0006
2 8 3 1.1388 0.0001
2 8 4 0.3624 0.0003
2 8 5 -0.4599 0.0002
2 8 6 -1.1659 -0.0000
2 8 7 -1.7259 -0.0001
2 8 8 -2.1322 -0.0001
2 8 9 -2.2974 -0.0002
2 8 10 -2.1106 -0.0003
2 8 11 -1.5839 -0.0002
2 8 12 -0.8980 -0.0001
2 8 13 -0.2959 -0.0002
2 8 14 0.0595 -0.0005
2 9 0 -0.9307 0.0004
2 9 1 -1.0853 0.0004
2 9 2 -0.9375 0.0001
2 9 3 -0.4854 -0.0002
2 9 4 0.1464 -0.0001
2 9 5 0.7995 0.0001
2 9 6 1.3642 0.0002
2 9 7 1.7928 -0.0001
2 9 8 2.0460 -0.0003
2 9 9 2.0476 -0.0002
2 9 10 1.7293 0.0000
2 9 11 1.1373 0.0002
2 9 12 0.4668 0.0001
2 9 13 -0.0418 0.0001
2 9 14 -0.2546 0.0001
2 10 0 0.4836 -0.0002
2 10 1 0.5438 -0.0003
2 10 2 0.3562 -0.0002
2 10 3 -0.0609 -0.0001
2 10 4 -0.5946 -0.0002
2 10 5 -1.1194 -0.0003
2 10 6 -1.5411 -0.0001
2 10 7 -1.8023 0.0004
2 10 8 -1.8720 0.0008
2 10 9 -1.7280 0.0006
2 10 10 -1.3627 -0.0001
2 10 11 -0.8296 -0.0007
2 10 12 -0.2753 -0.0009
2 10 13 0.1159 -0.0006
2 11 0 -0.0723 0.0007
2 11 1 -0.0862 0.0007
2 11 2 0.0870 0.0005
2 11 3 0.4381 0.0002
2 11 4 0.8699 0.0001
2 11 5 1.2704 0.0001
2 11 6 1.5490 -0.0000
2 11 7 1.6483 -0.0004
2 11 8 1.5614 -0.0007
2 11 9 1.3251 -0.0004
2 11 10 0.9854 0.0005
2 11 11 0.5872 0.0015
2 11 12 0.2048 0.0018
2 12 0 -0.1326 -0.0011
2 12 1 -0.1371 -0.0008
2 12 2 -0.2579 -0.0003
2 12 3 -0.5051 0.0002
2 12 4 -0.8103 0.0004
2 12 5 -1.0833 0.0003
2 12 6 -1.2462 0.0001
2 12 7 -1.2505 0.0001
2 12 8 -1.1029 0.0003
2 12 9 -0.8662 0.0000
2 12 10 -0.6079 -0.0007
2 12 11 -0.3594 -0.0016
2 13 1 0.1082 0.0005
2 13 2 0.1526 -0.0001
2 13 3 0.2774 -0.0005
2 13 4 0.4516 -0.0006
2 13 5 0.6154 -0.0003
2 13 6 0.7118 0.0002
2 13 7 0.7035 0.0003
2 13 8 0.5952 0.0002
2 13 9 0.4378 0.0000
3 -11 0 -0.2359 0.0028
3 -10 0 0.5360 -0.0026
3 -10 1 0.5243 -0.0017
3 -10 2 0.4722 -0.0006
3 -10 3 0.3302 0.0001
3 -9 0 -0.5130 0.0016
3 -9 1 -0.5786 0.0011
3 -9 2 -0.5413 0.0004
3 -9 3 -0.3398 -0.0002
3 -9 4 -0.1008 -0.0002
3 -9 5 0.0162 0.0001
3 -8 0 0.1393 -0.0007
3 -8 1 0.3568 -0.0005
3 -8 2 0.4104 -0.0000
3 -8 3 0.2142 0.0003
3 -8 4 -0.0786 0.0004
3 -8 5 -0.2508 0.0001
3 -8 6 -0.2358 -0.0001
3 -7 0 0.2642 0.0005
3 -7 1 -0.0987 0.0002
3 -7 2 -0.2606 -0.0002
3 -7 3 -0.1133 -0.0005
3 -7 4 0.1953 -0.0005
3 -7 5 0.4397 -0.0001
3 -7 6 0.5256 0.0002
3 -7 7 0.4935 0.0002
3 -6 0 -0.4245 -0.0007
3 -6 1 0.0527 -0.0002
3 -6 2 0.3112 0.0003
3 -6 3 0.2336 0.0006
3 -6 4 -0.0515 0.0006
3 -6 5 -0.3571 0.0002
3 -6 6 -0.6080 -0.0003
3 -6 7 -0.7908 -0.0005
3 -6 8 -0.8424 -0.0004
3 -6 9 -0.6957 -0.0002
3 -5 0 0.4135 0.0004
3 -5 1 -0.1905 -0.0000
3 -5 2 -0.5527 -0.0004
3 -5 3 -0.5460 -0.0006
3 -5 4 -0.2962 -0.0006
3 -5 5 0.0448 -0.0004
3 -5 6 0.4513 0.0001
3 -5 7 0.8945 0.0004
3 -5 8 1.1924 0.0004
3 -5 9 1.1405 0.0001
3 -5 10 0.7607 -0.0002
3 -4 0 -0.5105 0.0004
3 -4 1 0.2760 0.0006
3 -4 2 0.7629 0.0005
3 -4 3 0.7875 0.0004
3 -4 4 0.5127 0.0004
3 -4 5 0.1286 0.0003
3 -4 6 -0.3602 0.0001
3 -4 7 -0.9585 -0.0002
3 -4 8 -1.4397 -0.0002
3 -4 9 -1.4889 0.0001
3 -4 10 -1.0711 0.0005
3 -4 11 -0.4966 0.0007
3 -3 0 0.8759 -0.0013
3 -3 1 -0.1594 -0.0012
3 -3 2 -0.7888 -0.0008
3 -3 3 -0.7717 -0.0001
3 -3 4 -0.3492 0.0002
3 -3 5 0.1407 0.0000
3 -3 6 0.6311 -0.0001
3 -3 7 1.1859 0.0001
3 -3 8 1.6448 0.0002
3 -3 9 1.6784 0.0000
3 -3 10 1.2088 -0.0004
3 -3 11 0.5642 -0.0007
3 -2 0 -1.4595 0.0018
3 -2 1 -0.1268 0.0018
3 -2 2 0.6682 0.0010
3 -2 3 0.5708 -0.0000
3 -2 4 -0.0930 -0.0006
3 -2 5 -0.7620 -0.0004
3 -2 6 -1.2174 0.0000
3 -2 7 -1.5701 0.0001
3 -2 8 -1.8116 -0.0002
3 -2 9 -1.6973 -0.0003
3 -2 10 -1.1370 0.0000
3 -2 11 -0.4445 0.0004
3 -2 12 -0.0304 0.0006
3 -1 0 2.1205 -0.0017
3 -1 1 0.5093 -0.0018
3 -1 2 -0.4711 -0.0012
3 -1 3 -0.3417 -0.0001
3 -1 4 0.5357 0.0006
3 -1 5 1.3943 0.0004
3 -1 6 1.8232 -0.0002
3 -1 7 1.9398 -0.0005
3 -1 8 1.9053 -0.0002
3 -1 9 1.6080 0.0002
3 -1 10 0.9541 0.0003
3 -1 11 0.2090 -0.0001
3 -1 12 -0.2083 -0.0004
3 -1 13 -0.1873 -0.0006
3 0 0 -2.6380 0.0012
3 0 1 -0.8887 0.0015
3 0 2 0.2411 0.0011
3 0 3 0.1764 0.0003
3 0 4 -0.7743 -0.0004
3 0 5 -1.7496 -0.0003
3 0 6 -2.1737 0.0004
3 0 7 -2.1196 0.0008
3 0 8 -1.8734 0.0005
3 0 9 -1.4527 -0.0001
3 0 10 -0.7528 -0.0004
3 0 11 0.0459 -0.0001
3 0 12 0.5323 0.0003
3 0 13 0.5183 0.0007
3 1 0 2.6772 -0.0012
3 1 1 1.0225 -0.0013
3 1 2 -0.1349 -0.0010
3 1 3 -0.1916 -0.0003
3 1 4 0.6805 0.0004
3 1 5 1.6739 0.0004
3 1 6 2.1179 -0.0002
3 1 7 1.9921 -0.0007
3 1 8 1.6309 -0.0005
3 1 9 1.1619 0.0002
3 1 10 0.4840 0.0006
3 1 11 -0.3226 0.0003
3 1 12 -0.8899 -0.0003
3 1 13 -0.9436 -0.0008
3 1 14 -0.6036 -0.0009
3 2 0 -2.0495 0.0014
3 2 1 -0.6896 0.0012
3 2 2 0.3458 0.0009
3 2 3 0.5074 0.0002
3 2 4 -0.2051 -0.0004
3 2 5 -1.1585 -0.0006
3 2 6 -1.6625 -0.0001
3 2 7 -1.5647 0.0003
3 2 8 -1.1655 0.0003
3 2 9 -0.6854 -0.0002
3 2 10 -0.0778 -0.0006
3 2 11 0.6487 -0.0004
3 2 12 1.2087 0.0002
3 2 13 1.2950 0.0007
3 2 14 0.9272 0.0007
3 3 0 1.0533 -0.0008
3 3 1 0.0495 -0.0004
3 3 2 -0.7790 -0.0001
3 3 3 -1.0007 0.0002
3 3 4 -0.4638 0.0004
3 3 5 0.4273 0.0005
3 3 6 1.0264 0.0002
3 3 7 1.0372 -0.0002
3 3 8 0.6557 -0.0003
3 3 9 0.1661 0.0000
3 3 10 -0.3719 0.0003
3 3 11 -0.9598 0.0002
3 3 12 -1.4061 -0.0001
3 3 13 -1.4423 -0.0004
3 3 14 -1.0398 -0.0004
3 4 0 -0.2816 -0.0011
3 4 1 0.4313 -0.0014
3 4 2 1.0610 -0.0013
3 4 3 1.3131 -0.0008
3 4 4 0.9475 -0.0004
3 4 5 0.1544 -0.0002
3 4 6 -0.5147 0.0000
3 4 7 -0.6551 0.0003
3 4 8 -0.3251 0.0003
3 4 9 0.1805 0.0001
3 4 10 0.6915 -0.0001
3 4 11 1.1664 -0.0001
3 4 12 1.4800 -0.0000
3 4 13 1.4331 0.0000
3 4 14 0.9978 -0.0001
3 5 0 0.0151 0.0023
3 5 1 -0.5078 0.0025
3 5 2 -0.9860 0.0020
3 5 3 -1.2416 0.0011
3 5 4 -1.0269 0.0002
3 5 5 -0.3868 -0.0001
3 5 6 0.2535 -0.0002
3 5 7 0.4636 -0.0001
3 5 8 0.1889 -0.0000
3 5 9 -0.3189 0.0001
3 5 10 -0.8322 0.0002
3 5 11 -1.2602 0.0002
3 5 12 -1.5029 0.0002
3 5 13 -1.4101 0.0002
3 5 14 -0.9633 0.0004
3 6 0 -0.0401 -0.0013
3 6 1 0.3631 -0.0016
3 6 2 0.7210 -0.0014
3 6 3 0.9303 -0.0007
3 6 4 0.8065 0.0000
3 6 5 0.3446 0.0003
3 6 6 -0.1562 0.0001
3 6 7 -0.3346 -0.0002
3 6 8 -0.0970 -0.0004
3 6 9 0.3699 -0.0004
3 6 10 0.8538 -0.0004
3 6 11 1.2523 -0.0002
3 6 12 1.4743 -0.0000
3 6 13 1.3859 0.0000
3 6 14 0.9602 -0.0001
3 7 0 0.0774 -0.0009
3 7 1 -0.2416 -0.0001
3 7 2 -0.4955 0.0004
3 7 3 -0.6100 0.0004
3 7 4 -0.4954 0.0000
3 7 5 -0.1794 -0.0002
3 7 6 0.1328 -0.0001
3 7 7 0.2058 0.0002
3 7 8 -0.0160 0.0003
3 7 9 -0.3960 0.0003
3 7 10 -0.7822 0.0002
3 7 11 -1.1053 -0.0001
3 7 12 -1.2950 -0.0004
3 7 13 -1.2280 -0.0006
3 7 14 -0.8598 -0.0005
3 8 0 -0.0716 0.0019
3 8 1 0.1868 0.0008
3 8 2 0.3681 -0.0003
3 8 3 0.3892 -0.0007
3 8 4 0.2384 -0.0004
3 8 5 0.0077 0.0001
3 8 6 -0.1470 0.0003
3 8 7 -0.1110 0.0002
3 8 8 0.1019 0.0001
3 8 9 0.3811 0.0000
3 8 10 0.6361 0.0000
3 8 11 0.8418 0.0002
3 8 12 0.9602 0.0005
3 8 13 0.8974 0.0008
3 8 14 0.6090 0.0009
3 9 0 0.0106 -0.0011
3 9 1 -0.2123 -0.0002
3 9 2 -0.3687 0.0008
3 9 3 -0.3500 0.0011
3 9 4 -0.1744 0.0005
3 9 5 0.0221 -0.0002
3 9 6 0.1011 -0.0006
3 9 7 0.0196 -0.0005
3 9 8 -0.1641 -0.0002
3 9 9 -0.3584 0.0000
3 9 10 -0.5104 0.0002
3 9 11 -0.6116 0.0002
3 9 12 -0.6431 0.0000
3 9 13 -0.5537 -0.0003
3 10 0 0.1771 0.0002
3 10 1 0.3855 -0.0002
3 10 2 0.5491 -0.0007
3 10 3 0.5430 -0.0008
3 10 4 0.3748 -0.0002
3 10 5 0.1824 0.0004
3 10 6 0.0949 0.0007
3 10 7 0.1361 0.0003
3 10 8 0.2501 -0.0002
3 10 9 0.3751 -0.0005
3 10 10 0.4737 -0.0006
3 10 11 0.5193 -0.0006
3 10 12 0.4824 -0.0005
3 10 13 0.3480 -0.0003
3 11 0 -0.4128 -0.0001
3 11 1 -0.6074 -0.0002
3 11 2 -0.7700 -0.0000
3 11 3 -0.7870 0.0001
3 11 4 -0.6463 -0.0002
3 11 5 -0.4558 -0.0005
3 11 6 -0.3269 -0.0005
3 11 7 -0.2873 0.0000
3 11 8 -0.3109 0.0006
3 11 9 -0.3733 0.0008
3 11 10 -0.4465 0.0006
3 11 11 -0.4757 0.0004
3 11 12 -0.4062 0.0003
3 12 0 0.4583 0.0005
3 12 1 0.6129 0.0008
3 12 2 0.7374 0.0007
3 12 3 0.7575 0.0004
3 12 4 0.6562 0.0002
3 12 5 0.5018 0.0003
3 12 6 0.3717 0.0003
3 12 7 0.2900 -0.0000
3 12 8 0.2535 -0.0005
3 12 9 0.2679 -0.0006
3 12 10 0.3189 -0.0003
3 12 11 0.3430 0.0001
3 13 1 -0.3404 -0.0009
3 13 2 -0.3950 -0.0008
3 13 3 -0.3997 -0.0003
3 13 4 -0.3492 0.0000
3 13 5 -0.2748 -0.0001
3 13 6 -0.2087 -0.0003
3 13 7 -0.1543 -0.0002
3 13 8 -0.1118 0.0001
3 13 9 -0.1009 0.0003
4 -10 0 -0.2950 0.0007
4 -10 1 -0.0216 0.0003
4 -9 0 0.3812 -0.0012
4 -9 1 0.0034 -0.0009
4 -9 2 -0.2174 -0.0002
4 -9 3 -0.3219 0.0003
4 -8 0 -0.0121 0.0012
4 -8 1 0.3286 0.0012
4 -8 2 0.5205 0.0006
4 -8 3 0.6308 0.0001
4 -8 4 0.6138 -0.0002
4 -8 5 0.4195 -0.0002
4 -7 0 -0.7022 -0.0008
4 -7 1 -0.9421 -0.0008
4 -7 2 -1.0118 -0.0006
4 -7 3 -1.0264 -0.0003
4 -7 4 -0.9580 -0.0002
4 -7 5 -0.7319 -0.0001
4 -7 6 -0.3860 0.0001
4 -7 7 -0.0738 0.0002
4 -6 0 1.4168 0.0004
4 -6 1 1.5765 0.0004
4 -6 2 1.4932 0.0003
4 -6 3 1.3273 0.0002
4 -6 4 1.1196 0.0002
4 -6 5 0.8433 0.0002
4 -6 6 0.5200 0.0001
4 -6 7 0.2310 0.0000
4 -6 8 0.0472 -0.0000
4 -5 0 -1.9400 -0.0006
4 -5 1 -2.0282 -0.0005
4 -5 2 -1.7740 -0.0003
4 -5 3 -1.3725 -0.0001
4 -5 4 -0.9536 0.0000
4 -5 5 -0.5915 0.0000
4 -5 6 -0.3417 0.0000
4 -5 7 -0.2081 0.0000
4 -5 8 -0.1302 0.0001
4 -5 9 -0.0607 0.0001
4 -4 0 2.4057 0.0009
4 -4 1 2.3678 0.0008
4 -4 2 1.9015 0.0006
4 -4 3 1.2478 0.0003
4 -4 4 0.6085 -0.0001
4 -4 5 0.1445 -0.0003
4 -4 6 -0.0361 -0.0003
4 -4 7 0.0271 -0.0001
4 -4 8 0.1421 -0.0001
4 -4 9 0.1499 -0.0003
4 -4 10 0.0717 -0.0005
4 -3 0 -3.0838 -0.0005
4 -3 1 -2.8265 -0.0006
4 -3 2 -2.0861 -0.0007
4 -3 3 -1.1933 -0.0004
4 -3 4 -0.3905 0.0001
4 -3 5 0.1519 0.0004
4 -3 6 0.3145 0.0003
4 -3 7 0.1436 -0.0001
4 -3 8 -0.1079 -0.0003
4 -3 9 -0.1971 0.0001
4 -3 10 -0.1221 0.0006
4 -3 11 -0.0423 0.0007
4 -2 0 4.0696 -0.0003
4 -2 1 3.4945 -0.0000
4 -2 2 2.4044 0.0004
4 -2 3 1.2772 0.0004
4 -2 4 0.3850 -0.0000
4 -2 5 -0.1778 -0.0004
4 -2 6 -0.3635 -0.0001
4 -2 7 -0.2191 0.0005
4 -2 8 0.0272 0.0008
4 -2 9 0.1265 0.0004
4 -2 10 0.0619 -0.0003
4 -2 11 0.0070 -0.0006
4 -1 0 -5.1604 0.0004
4 -1 1 -4.1968 0.0001
4 -1 2 -2.6894 -0.0003
4 -1 3 -1.3021 -0.0004
4 -1 4 -0.3618 -0.0000
4 -1 5 0.1480 0.0004
4 -1 6 0.3246 0.0002
4 -1 7 0.2509 -0.0004
4 -1 8 0.0895 -0.0008
4 -1 9 0.0329 -0.0006
4 -1 10 0.0943 0.0001
4 -1 11 0.1068 0.0004
4 -1 12 -0.0091 0.0002
4 0 0 5.9763 0.0004
4 0 1 4.6401 0.0005
4 0 2 2.7179 0.0007
4 0 3 1.0497 0.0006
4 0 4 0.0625 0.0002
4 0 5 -0.3354 -0.0003
4 0 6 -0.4091 -0.0004
4 0 7 -0.3259 0.0001
4 0 8 -0.2007 0.0006
4 0 9 -0.1572 0.0004
4 0 10 -0.2075 -0.0001
4 0 11 -0.2076 -0.0005
4 0 12 -0.0636 -0.0003
4 0 13 0.1084 0.0000
4 1 0 -6.1798 -0.0005
4 1 1 -4.6099 -0.0004
4 1 2 -2.3970 -0.0006
4 1 3 -0.4908 -0.0005
4 1 4 0.5518 -0.0002
4 1 5 0.8219 0.0002
4 1 6 0.7180 0.0004
4 1 7 0.5182 0.0001
4 1 8 0.3267 -0.0004
4 1 9 0.2163 -0.0004
4 1 10 0.2170 0.0001
4 1 11 0.2346 0.0005
4 1 12 0.1546 0.0004
4 1 13 0.0111 0.0001
4 2 0 5.6784 -0.0011
4 2 1 4.0750 -0.0010
4 2 2 1.7812 -0.0005
4 2 3 -0.2435 -0.0000
4 2 4 -1.3256 0.0001
4 2 5 -1.4902 0.0000
4 2 6 -1.2052 -0.0001
4 2 7 -0.8513 0.0001
4 2 8 -0.5426 0.0004
4 2 9 -0.3089 0.0005
4 2 10 -0.2037 0.0002
4 2 11 -0.2128 -0.0002
4 2 12 -0.2294 -0.0003
4 2 13 -0.1841 -0.0000
4 3 0 -4.7110 0.0028
4 3 1 -3.2137 0.0023
4 3 2 -1.0292 0.0014
4 3 3 0.9634 0.0005
4 3 4 2.0322 -0.0002
4 3 5 2.1147 -0.0003
4 3 6 1.6901 -0.0002
4 3 7 1.2124 -0.0001
4 3 8 0.8085 -0.0003
4 3 9 0.4578 -0.0003
4 3 10 0.2162 -0.0002
4 3 11 0.1556 0.0000
4 3 12 0.2217 0.0001
4 3 13 0.2766 -0.0001
4 3 14 0.2409 -0.0003
4 4 0 3.6797 -0.0025
4 4 1 2.3111 -0.0020
4 4 2 0.3384 -0.0012
4 4 3 -1.4920 -0.0004
4 4 4 -2.4707 0.0002
4 4 5 -2.4737 0.0005
4 4 6 -1.9525 0.0003
4 4 7 -1.3975 -0.0000
4 4 8 -0.9491 -0.0002
4 4 9 -0.5383 -0.0002
4 4 10 -0.1937 -0.0001
4 4 11 -0.0446 -0.0001
4 4 12 -0.1071 -0.0001
4 4 13 -0.2268 0.0001
4 4 14 -0.2440 0.0002
4 5 0 -2.8102 0.0007
4 5 1 -1.5369 0.0006
4 5 2 0.1832 0.0005
4 5 3 1.7507 0.0002
4 5 4 2.5610 -0.0001
4 5 5 2.4818 -0.0002
4 5 6 1.9107 -0.0001
4 5 7 1.3252 0.0002
4 5 8 0.8755 0.0004
4 5 9 0.4702 0.0005
4 5 10 0.1041 0.0003
4 5 11 -0.0805 0.0002
4 5 12 -0.0222 0.0001
4 5 13 0.1335 -0.0001
4 5 14 0.1902 -0.0001
4 6 0 2.0471 0.0003
4 6 1 0.8708 0.0001
4 6 2 -0.5581 -0.0003
4 6 3 -1.7804 -0.0005
4 6 4 -2.3608 -0.0004
4 6 5 -2.2148 -0.0002
4 6 6 -1.6651 0.0000
4 6 7 -1.1114 -0.0001
4 6 8 -0.6914 -0.0002
4 6 9 -0.3259 -0.0003
4 6 10 -0.0018 -0.0002
4 6 11 0.1499 -0.0001
4 6 12 0.0639 -0.0000
4 6 13 -0.1166 0.0000
4 6 14 -0.1854 0.0000
4 7 0 -1.3243 0.0002
4 7 1 -0.2965 0.0004
4 7 2 0.8035 0.0007
4 7 3 1.6382 0.0009
4 7 4 1.9662 0.0007
4 7 5 1.7884 0.0003
4 7 6 1.3423 -0.0001
4 7 7 0.8923 -0.0002
4 7 8 0.5259 -0.0001
4 7 9 0.1952 -0.0001
4 7 10 -0.0823 -0.0001
4 7 11 -0.1813 -0.0000
4 7 12 -0.0539 0.0001
4 7 13 0.1483 0.0002
4 7 14 0.2172 0.0002
4 8 0 0.7538 -0.0012
4 8 1 -0.0863 -0.0010
4 8 2 -0.8758 -0.0008
4 8 3 -1.3653 -0.0007
4 8 4 -1.4781 -0.0004
4 8 5 -1.3050 -0.0001
4 8 6 -1.0085 0.0002
4 8 7 -0.7042 0.0002
4 8 8 -0.4056 0.0001
4 8 9 -0.0948 0.0000
4 8 10 0.1626 0.0000
4 8 11 0.2341 -0.0001
4 8 12 0.0858 -0.0003
4 8 13 -0.1285 -0.0006
4 8 14 -0.2067 -0.0006
4 9 0 -0.4169 0.0013
4 9 1 0.2574 0.0008
4 9 2 0.8312 0.0003
4 9 3 1.0993 -0.0000
4 9 4 1.0775 -0.0002
4 9 5 0.9188 -0.0002
4 9 6 0.7423 -0.0001
4 9 7 0.5588 0.0001
4 9 8 0.3237 0.0003
4 9 9 0.0376 0.0003
4 9 10 -0.2026 0.0001
4 9 11 -0.2677 -0.0000
4 9 12 -0.1334 0.0002
4 9 13 0.0643 0.0007
4 10 0 0.1782 -0.0008
4 10 1 -0.3886 -0.0003
4 10 2 -0.8572 0.0002
4 10 3 -1.0309 0.0006
4 10 4 -0.9430 0.0006
4 10 5 -0.7670 0.0004
4 10 6 -0.6154 -0.0000
4 10 7 -0.4699 -0.0004
4 10 8 -0.2730 -0.0006
4 10 9 -0.0352 -0.0004
4 10 10 0.1537 0.0001
4 10 11 0.2014 0.0005
4 10 12 0.1029 0.0004
4 10 13 -0.0393 -0.0001
4 11 0 0.0863 0.0003
4 11 1 0.5784 0.0001
4 11 2 0.9909 -0.0003
4 11 3 1.1292 -0.0006
4 11 4 1.0014 -0.0006
4 11 5 0.7677 -0.0003
4 11 6 0.5544 0.0001
4 11 7 0.3714 0.0005
4 11 8 0.1885 0.0005
4 11 9 0.0213 0.0003
4 11 10 -0.0783 -0.0003
4 11 11 -0.0818 -0.0008
4 11 12 -0.0161 -0.0010
4 12 0 -0.2559 -0.0001
4 12 1 -0.6546 -0.0002
4 12 2 -0.9910 -0.0001
4 12 3 -1.0942 0.0003
4 12 4 -0.9450 0.0004
4 12 5 -0.6700 0.0001
4 12 6 -0.3996 -0.0002
4 12 7 -0.1813 -0.0005
4 12 8 -0.0195 -0.0005
4 12 9 0.0698 -0.0002
4 12 10 0.0756 0.0002
4 13 1 0.4515 0.0004
4 13 2 0.6764 0.0004
4 13 3 0.7408 0.0000
4 13 4 0.6168 -0.0002
4 13 5 0.3859 -0.0001
4 13 6 0.1521 0.0003
4 13 7 -0.0294 0.0005
4 13 8 -0.1388 0.0005
5 -9 0 -0.8863 -0.0019
5 -9 1 -0.3604 -0.0019
5 -8 0 1.2130 0.0011
5 -8 1 0.5383 0.0011
5 -8 2 -0.0175 0.0010
5 -8 3 -0.3840 0.0006
5 -7 0 -1.0697 -0.0010
5 -7 1 -0.3396 -0.0008
5 -7 2 0.2944 -0.0005
5 -7 3 0.7818 -0.0002
5 -7 4 1.0169 0.0001
5 -7 5 0.9282 0.0002
5 -6 0 0.6035 0.0015
5 -6 1 -0.1969 0.0011
5 -6 2 -0.8608 0.0006
5 -6 3 -1.3775 0.0001
5 -6 4 -1.6702 -0.0003
5 -6 5 -1.6330 -0.0004
5 -6 6 -1.2589 -0.0003
5 -6 7 -0.7015 -0.0001
5 -5 0 -0.1020 -0.0016
5 -5 1 0.8367 -0.0011
5 -5 2 1.5330 -0.0005
5 -5 3 1.9931 0.0000
5 -5 4 2.2153 0.0003
5 -5 5 2.1480 0.0003
5 -5 6 1.7526 0.0001
5 -5 7 1.0941 -0.0000
5 -5 8 0.3849 -0.0000
5 -4 0 -0.3275 0.0010
5 -4 1 -1.4274 0.0005
5 -4 2 -2.1533 -0.0001
5 -4 3 -2.4894 -0.0003
5 -4 4 -2.5124 -0.0003
5 -4 5 -2.2927 -0.0002
5 -4 6 -1.8489 0.0001
5 -4 7 -1.1876 0.0002
5 -4 8 -0.4189 0.0002
5 -4 9 0.1933 0.0001
5 -3 0 0.8348 -0.0009
5 -3 1 2.0449 -0.0002
5 -3 2 2.7544 0.0004
5 -3 3 2.9141 0.0005
5 -3 4 2.6549 0.0003
5 -3 5 2.1756 -0.0001
5 -3 6 1.6123 -0.0002
5 -3 7 0.9791 -0.0002
5 -3 8 0.2829 -0.0002
5 -3 9 -0.3104 -0.0002
5 -3 10 -0.5457 -0.0001
5 -2 0 -1.6216 0.0020
5 -2 1 -2.8435 0.0010
5 -2 2 -3.4397 0.0000
5 -2 3 -3.3677 -0.0003
5 -2 4 -2.7966 -0.0000
5 -2 5 -2.0096 0.0002
5 -2 6 -1.2499 0.0003
5 -2 7 -0.5875 0.0001
5 -2 8 0.0228 0.0000
5 -2 9 0.5234 0.0001
5 -2 10 0.7094 0.0001
5 -2 11 0.4969 -0.0000
5 -1 0 2.6838 -0.0028
5 -1 1 3.8006 -0.0015
5 -1 2 4.1576 -0.0003
5 -1 3 3.7882 0.0002
5 -1 4 2.9177 0.0000
5 -1 5 1.8592 -0.0002
5 -1 6 0.8942 -0.0002
5 -1 7 0.1386 0.0001
5 -1 8 -0.4535 0.0001
5 -1 9 -0.8871 -0.0001
5 -1 10 -1.0104 -0.0002
5 -1 11 -0.7274 -0.0000
5 0 0 -3.7564 0.0017
5 0 1 -4.6707 0.0006
5 0 2 -4.6904 -0.0003
5 0 3 -3.9760 -0.0007
5 0 4 -2.8477 -0.0003
5 0 5 -1.6228 0.0001
5 0 6 -0.5440 0.0002
5 0 7 0.2828 -0.0000
5 0 8 0.8919 -0.0001
5 0 9 1.3040 0.0001
5 0 10 1.3951 0.0004
5 0 11 1.0547 0.0002
5 0 12 0.4611 -0.0001
5 1 0 4.4892 0.0003
5 1 1 5.1737 0.0008
5 1 2 4.8524 0.0012
5 1 3 3.8080 0.0010
5 1 4 2.4781 0.0004
5 1 5 1.1948 -0.0002
5 1 6 0.1283 -0.0004
5 1 7 -0.6742 -0.0001
5 1 8 -1.2519 0.0001
5 1 9 -1.6271 -0.0002
5 1 10 -1.6965 -0.0005
5 1 11 -1.3391 -0.0005
5 1 12 -0.6795 -0.0002
5 2 0 -4.6694 -0.0012
5 2 1 -5.1782 -0.0013
5 2 2 -4.6216 -0.0012
5 2 3 -3.3425 -0.0008
5 2 4 -1.8753 -0.0001
5 2 5 -0.5884 0.0005
5 2 6 0.3982 0.0006
5 2 7 1.0970 0.0002
5 2 8 1.5608 -0.0001
5 2 9 1.8214 -0.0000
5 2 10 1.8206 0.0004
5 2 11 1.4633 0.0005
5 2 12 0.8213 0.0003
5 2 13 0.2018 -0.0000
5 3 0 4.3412 0.0008
5 3 1 4.7456 0.0007
5 3 2 4.1011 0.0005
5 3 3 2.7323 0.0002
5 3 4 1.2080 -0.0002
5 3 5 -0.0646 -0.0005
5 3 6 -0.9721 -0.0005
5 3 7 -1.5500 -0.0001
5 3 8 -1.8508 0.0003
5 3 9 -1.9195 0.0003
5 3 10 -1.7713 -0.0001
5 3 11 -1.3889 -0.0003
5 3 12 -0.8236 -0.0002
5 3 13 -0.2760 0.0002
5 4 0 -3.7663 -0.0003
5 4 1 -4.0713 0.0000
5 4 2 -3.4313 0.0002
5 4 3 -2.1052 0.0001
5 4 4 -0.6220 0.0001
5 4 5 0.6028 0.0002
5 4 6 1.4380 0.0002
5 4 7 1.9085 0.0000
5 4 8 2.0494 -0.0002
5 4 9 1.9096 -0.0002
5 4 10 1.5767 0.0000
5 4 11 1.1366 0.0002
5 4 12 0.6615 0.0001
5 4 13 0.2553 -0.0003
5 5 0 3.2147 0.0007
5 5 1 3.3542 0.0001
5 5 2 2.7259 -0.0003
5 5 3 1.5217 -0.0002
5 5 4 0.1738 0.0001
5 5 5 -0.9424 0.0002
5 5 6 -1.6845 0.0001
5 5 7 -2.0562 -0.0000
5 5 8 -2.0737 -0.0001
5 5 9 -1.7788 -0.0001
5 5 10 -1.2995 -0.0002
5 5 11 -0.8019 -0.0003
5 5 12 -0.3982 -0.0001
5 5 13 -0.1336 0.0002
5 6 0 -2.7461 -0.0019
5 6 1 -2.6709 -0.0009
5 6 2 -2.0374 -0.0000
5 6 3 -0.9952 0.0002
5 6 4 0.1500 0.0000
5 6 5 1.1054 -0.0002
5 6 6 1.7322 -0.0002
5 6 7 2.0136 0.0001
5 6 8 1.9538 0.0003
5 6 9 1.5861 0.0004
5 6 10 1.0420 0.0004
5 6 11 0.5192 0.0002
5 6 12 0.1596 -0.0000
5 6 13 -0.0116 -0.0002
5 7 0 2.2607 0.0030
5 7 1 2.0123 0.0018
5 7 2 1.3989 0.0004
5 7 3 0.5474 -0.0003
5 7 4 -0.3653 -0.0002
5 7 5 -1.1471 0.0001
5 7 6 -1.6681 0.0003
5 7 7 -1.8819 0.0001
5 7 8 -1.7820 -0.0002
5 7 9 -1.3998 -0.0003
5 7 10 -0.8552 -0.0001
5 7 11 -0.3409 0.0001
5 7 12 -0.0092 0.0004
5 7 13 0.1137 0.0006
5 8 0 -1.7541 -0.0033
5 8 1 -1.4338 -0.0020
5 8 2 -0.8879 -0.0004
5 8 3 -0.2295 0.0005
5 8 4 0.4696 0.0004
5 8 5 1.1078 -0.0001
5 8 6 1.5590 -0.0005
5 8 7 1.7358 -0.0005
5 8 8 1.6150 -0.0002
5 8 9 1.2346 -0.0001
5 8 10 0.7099 -0.0001
5 8 11 0.2196 -0.0003
5 8 12 -0.0846 -0.0004
5 8 13 -0.1718 -0.0006
5 9 0 1.3548 0.0025
5 9 1 1.0354 0.0014
5 9 2 0.5631 0.0000
5 9 3 0.0461 -0.0007
5 9 4 -0.5026 -0.0005
5 9 5 -1.0420 0.0002
5 9 6 -1.4501 0.0007
5 9 7 -1.6055 0.0006
5 9 8 -1.4696 0.0004
5 9 9 -1.0914 0.0002
5 9 10 -0.5897 0.0001
5 9 11 -0.1305 0.0001
5 9 12 0.1408 0.0001
5 9 13 0.1909 0.0001
5 10 0 -1.0806 -0.0013
5 10 1 -0.7772 -0.0005
5 10 2 -0.3462 0.0004
5 10 3 0.0981 0.0008
5 10 4 0.5512 0.0004
5 10 5 1.0011 -0.0003
5 10 6 1.3449 -0.0006
5 10 7 1.4608 -0.0005
5 10 8 1.3112 -0.0001
5 10 9 0.9539 0.0001
5 10 10 0.5020 0.0001
5 10 11 0.0975 0.0000
5 10 12 -0.1327 0.0001
5 11 0 0.7788 0.0003
5 11 1 0.4960 -0.0002
5 11 2 0.1014 -0.0006
5 11 3 -0.2821 -0.0006
5 11 4 -0.6295 -0.0001
5 11 5 -0.9410 0.0004
5 11 6 -1.1555 0.0005
5 11 7 -1.1915 0.0002
5 11 8 -1.0334 -0.0003
5 11 9 -0.7392 -0.0004
5 11 10 -0.3938 -0.0002
5 11 11 -0.0909 0.0000
5 12 0 -0.3964 0.0002
5 12 1 -0.1631 0.0005
5 12 2 0.1514 0.0006
5 12 3 0.4283 0.0004
5 12 4 0.6244 -0.0000
5 12 5 0.7492 -0.0003
5 12 6 0.7941 -0.0002
5 12 7 0.7366 0.0001
5 12 8 0.5901 0.0004
5 12 9 0.4007 0.0004
5 12 10 0.2086 0.0001
5 13 2 -0.2522 -0.0007
5 13 3 -0.3981 -0.0004
5 13 4 -0.4502 0.0000
5 13 5 -0.4250 0.0001
5 13 6 -0.3512 -0.0001
5 13 7 -0.2496 -0.0003
5 13 8 -0.1485 -0.0003
6 -8 0 -1.2372 0.0014
6 -8 1 -0.9103 0.0009
6 -7 0 1.7390 -0.0016
6 -7 1 1.3646 -0.0010
6 -7 2 0.8194 -0.0003
6 -7 3 0.2490 0.0001
6 -6 0 -1.9208 0.0009
6 -6 1 -1.5014 0.0005
6 -6 2 -0.8598 -0.0001
6 -6 3 -0.1007 -0.0004
6 -6 4 0.5571 -0.0002
6 -6 5 0.8908 0.0001
6 -5 0 1.9262 -0.0005
6 -5 1 1.3685 -0.0001
6 -5 2 0.6050 0.0004
6 -5 3 -0.2948 0.0005
6 -5 4 -1.1407 0.0002
6 -5 5 -1.6615 -0.0001
6 -5 6 -1.6684 -0.0004
6 -5 7 -1.2034 -0.0004
6 -4 0 -1.9127 0.0012
6 -4 1 -1.1115 0.0006
6 -4 2 -0.1678 -0.0001
6 -4 3 0.8209 -0.0003
6 -4 4 1.7098 -0.0001
6 -4 5 2.2761 0.0003
6 -4 6 2.3099 0.0005
6 -4 7 1.7727 0.0005
6 -4 8 0.9101 0.0004
6 -3 0 1.8611 -0.0020
6 -3 1 0.7886 -0.0012
6 -3 2 -0.3535 -0.0003
6 -3 3 -1.3684 0.0002
6 -3 4 -2.1334 0.0001
6 -3 5 -2.5485 -0.0003
6 -3 6 -2.5106 -0.0005
6 -3 7 -1.9732 -0.0005
6 -3 8 -1.0871 -0.0003
6 -3 9 -0.2401 -0.0002
6 -2 0 -1.6418 0.0015
6 -2 1 -0.3623 0.0008
6 -2 2 0.9211 -0.0001
6 -2 3 1.8921 -0.0005
6 -2 4 2.4164 -0.0004
6 -2 5 2.5273 0.0000
6 -2 6 2.3052 0.0003
6 -2 7 1.7808 0.0003
6 -2 8 1.0147 0.0000
6 -2 9 0.2492 -0.0001
6 -2 10 -0.1770 -0.0000
6 -1 0 1.2055 0.0000
6 -1 1 -0.1727 0.0004
6 -1 2 -1.4924 0.0008
6 -1 3 -2.3667 0.0009
6 -1 4 -2.6384 0.0005
6 -1 5 -2.4231 0.0000
6 -1 6 -1.9604 -0.0002
6 -1 7 -1.3930 -0.0000
6 -1 8 -0.7402 0.0003
6 -1 9 -0.0994 0.0004
6 -1 10 0.2814 0.0001
6 0 0 -0.6453 -0.0014
6 0 1 0.7320 -0.0014
6 0 2 1.9872 -0.0012
6 0 3 2.7459 -0.0008
6 0 4 2.8469 -0.0002
6 0 5 2.4168 0.0003
6 0 6 1.7553 0.0004
6 0 7 1.0802 0.0001
6 0 8 0.4205 -0.0003
6 0 9 -0.1982 -0.0004
6 0 10 -0.5838 0.0000
6 0 11 -0.5558 0.0006
6 1 0 0.1030 0.0016
6 1 1 -1.2097 0.0014
6 1 2 -2.3380 0.0009
6 1 3 -2.9790 0.0003
6 1 4 -2.9998 -0.0002
6 1 5 -2.4967 -0.0005
6 1 6 -1.7331 -0.0005
6 1 7 -0.9360 -0.0002
6 1 8 -0.1647 0.0001
6 1 9 0.5498 0.0002
6 1 10 1.0125 -0.0002
6 1 11 0.9957 -0.0006
6 2 0 0.2949 -0.0008
6 2 1 1.5244 -0.0006
6 2 2 2.5152 -0.0003
6 2 3 3.0366 0.0000
6 2 4 3.0026 0.0002
6 2 5 2.4857 0.0001
6 2 6 1.6860 0.0000
6 2 7 0.8024 -0.0001
6 2 8 -0.0796 -0.0001
6 2 9 -0.8964 -0.0001
6 2 10 -1.4341 0.0001
6 2 11 -1.4277 0.0004
6 2 12 -0.9015 0.0004
6 3 0 -0.4447 -0.0001
6 3 1 -1.6086 -0.0003
6 3 2 -2.4998 -0.0003
6 3 3 -2.9153 -0.0003
6 3 4 -2.8035 -0.0000
6 3 5 -2.2459 0.0003
6 3 6 -1.4182 0.0005
6 3 7 -0.5032 0.0003
6 3 8 0.3976 -0.0000
6 3 9 1.2085 -0.0002
6 3 10 1.7340 -0.0001
6 3 11 1.7165 -0.0001
6 3 12 1.1437 -0.0001
6 4 0 0.3631 0.0002
6 4 1 1.4725 0.0004
6 4 2 2.3091 0.0005
6 4 3 2.6524 0.0004
6 4 4 2.4536 0.0001
6 4 5 1.8233 -0.0004
6 4 6 0.9633 -0.0005
6 4 7 0.0705 -0.0001
6 4 8 -0.7444 0.0004
6 4 9 -1.4243 0.0005
6 4 10 -1.8377 0.0003
6 4 11 -1.7861 -0.0000
6 4 12 -1.2397 -0.0001
6 5 0 -0.2663 0.0007
6 5 1 -1.2776 0.0003
6 5 2 -2.0486 -0.0001
6 5 3 -2.3348 -0.0004
6 5 4 -2.0646 -0.0003
6 5 5 -1.3707 0.0001
6 5 6 -0.4966 0.0002
6 5 7 0.3366 -0.0001
6 5 8 1.0163 -0.0006
6 5 9 1.5133 -0.0008
6 5 10 1.7688 -0.0004
6 5 11 1.6650 -0.0000
6 5 12 1.1814 0.0001
6 5 13 0.5433 -0.0000
6 6 0 0.3704 -0.0012
6 6 1 1.2033 -0.0008
6 6 2 1.8390 -0.0002
6 6 3 2.0407 0.0003
6 6 4 1.7117 0.0004
6 6 5 0.9860 0.0001
6 6 6 0.1283 -0.0001
6 6 7 -0.6334 0.0000
6 6 8 -1.1946 0.0004
6 6 9 -1.5402 0.0006
6 6 10 -1.6514 0.0004
6 6 11 -1.4765 0.0002
6 6 12 -1.0294 0.0001
6 6 13 -0.4883 0.0001
6 7 0 -0.6164 0.0003
6 7 1 -1.2354 0.0001
6 7 2 -1.6855 -0.0003
6 7 3 -1.7749 -0.0006
6 7 4 -1.3989 -0.0005
6 7 5 -0.6767 -0.0002
6 7 6 0.1346 0.0002
6 7 7 0.8245 0.0003
6 7 8 1.3059 0.0000
6 7 9 1.5597 -0.0003
6 7 10 1.5654 -0.0004
6 7 11 1.3080 -0.0004
6 7 12 0.8503 -0.0006
6 8 0 0.7792 0.0012
6 8 1 1.2307 0.0011
6 8 2 1.5164 0.0009
6 8 3 1.5054 0.0007
6 8 4 1.1067 0.0005
6 8 5 0.4237 0.0000
6 8 6 -0.3102 -0.0003
6 8 7 -0.9159 -0.0004
6 8 8 -1.3294 -0.0002
6 8 9 -1.5234 0.0001
6 8 10 -1.4566 0.0004
6 8 11 -1.1297 0.0007
6 8 12 -0.6537 0.0010
6 9 0 -0.8093 -0.0018
6 9 1 -1.1603 -0.0013
6 9 2 -1.3287 -0.0006
6 9 3 -1.2386 -0.0002
6 9 4 -0.8319 0.0000
6 9 5 -0.2083 0.0002
6 9 6 0.4245 0.0004
6 9 7 0.9215 0.0004
6 9 8 1.2468 0.0002
6 9 9 1.3758 -0.0001
6 9 10 1.2558 -0.0004
6 9 11 0.8962 -0.0006
6 9 12 0.4403 -0.0009
6 10 0 0.8248 0.0014
6 10 1 1.0972 0.0007
6 10 2 1.1663 -0.0001
6 10 3 0.9970 -0.0005
6 10 4 0.5768 -0.0005
6 10 5 0.0147 -0.0003
6 10 6 -0.5055 -0.0003
6 10 7 -0.8738 -0.0004
6 10 8 -1.0869 -0.0003
6 10 9 -1.1403 -0.0002
6 10 10 -0.9867 0.0001
6 10 11 -0.6411 0.0003
6 11 0 -0.8072 -0.0011
6 11 1 -0.9974 -0.0004
6 11 2 -0.9834 0.0004
6 11 3 -0.7562 0.0006
6 11 4 -0.3456 0.0004
6 11 5 0.1313 0.0001
6 11 6 0.5194 0.0002
6 11 7 0.7475 0.0004
6 11 8 0.8460 0.0006
6 11 9 0.8374 0.0005
6 11 10 0.6883 0.0002
6 12 0 0.6058 0.0010
6 12 1 0.7315 0.0004
6 12 2 0.6911 -0.0001
6 12 3 0.4855 -0.0003
6 12 4 0.1641 -0.0000
6 12 5 -0.1668 0.0001
6 12 6 -0.3927 -0.0002
6 12 7 -0.4820 -0.0006
6 12 8 -0.4907 -0.0009
6 12 9 -0.4599 -0.0007
6 13 4 -0.0618 -0.0000
6 13 5 0.0905 -0.0000
7 -7 0 -0.6940 0.0010
7 -7 1 -0.7458 0.0008
7 -6 0 0.9640 -0.0005
7 -6 1 1.1137 -0.0003
7 -6 2 0.9918 0.0002
7 -6 3 0.6372 0.0006
7 -5 0 -1.1251 -0.0000
7 -5 1 -1.3453 -0.0002
7 -5 2 -1.2573 -0.0005
7 -5 3 -0.8233 -0.0007
7 -5 4 -0.2249 -0.0005
7 -5 5 0.2505 -0.0003
7 -4 0 1.2880 -0.0004
7 -4 1 1.4698 -0.0001
7 -4 2 1.3472 0.0003
7 -4 3 0.8430 0.0004
7 -4 4 0.1025 0.0002
7 -4 5 -0.5579 -0.0001
7 -4 6 -0.8544 -0.0002
7 -3 0 -1.4630 0.0018
7 -3 1 -1.5063 0.0011
7 -3 2 -1.2677 0.0003
7 -3 3 -0.7135 -0.0001
7 -3 4 0.0437 0.0000
7 -3 5 0.7490 0.0003
7 -3 6 1.1312 0.0005
7 -3 7 1.0572 0.0004
7 -2 0 1.5641 -0.0035
7 -2 1 1.4615 -0.0023
7 -2 2 1.0908 -0.0009
7 -2 3 0.5290 0.0001
7 -2 4 -0.1124 0.0002
7 -2 5 -0.6963 -0.0001
7 -2 6 -1.0761 -0.0003
7 -2 7 -1.1240 -0.0001
7 -2 8 -0.8274 0.0001
7 -1 0 -1.5797 0.0045
7 -1 1 -1.3972 0.0031
7 -1 2 -0.9346 0.0012
7 -1 3 -0.3839 -0.0001
7 -1 4 0.1078 -0.0005
7 -1 5 0.5025 -0.0002
7 -1 6 0.8132 -0.0001
7 -1 7 0.9790 -0.0002
7 -1 8 0.8856 -0.0005
7 -1 9 0.5565 -0.0005
7 0 0 1.5964 -0.0041
7 0 1 1.3871 -0.0027
7 0 2 0.8613 -0.0010
7 0 3 0.2716 0.0001
7 0 4 -0.1795 0.0004
7 0 5 -0.4736 0.0001
7 0 6 -0.7185 -0.0001
7 0 7 -0.9300 0.0001
7 0 8 -0.9567 0.0004
7 0 9 -0.7007 0.0005
7 0 10 -0.3196 0.0001
7 1 0 -1.6232 0.0023
7 1 1 -1.3899 0.0013
7 1 2 -0.8019 0.0002
7 1 3 -0.1047 -0.0003
7 1 4 0.4540 -0.0002
7 1 5 0.7975 0.0002
7 1 6 1.0226 0.0005
7 1 7 1.1839 0.0004
7 1 8 1.1573 0.0000
7 1 9 0.8261 -0.0000
7 1 10 0.3359 0.0003
7 2 0 1.5557 -0.0006
7 2 1 1.2850 -0.0000
7 2 2 0.6506 0.0005
7 2 3 -0.1465 0.0006
7 2 4 -0.8450 0.0002
7 2 5 -1.2934 -0.0002
7 2 6 -1.5149 -0.0005
7 2 7 -1.5595 -0.0006
7 2 8 -1.3592 -0.0003
7 2 9 -0.8540 -0.0001
7 2 10 -0.2271 -0.0002
7 2 11 0.1698 -0.0006
7 3 0 -1.3912 0.0003
7 3 1 -1.0760 0.0001
7 3 2 -0.4267 -0.0002
7 3 3 0.3894 -0.0003
7 3 4 1.1272 -0.0002
7 3 5 1.6049 -0.0000
7 3 6 1.7889 0.0002
7 3 7 1.7104 0.0004
7 3 8 1.3464 0.0002
7 3 9 0.7011 -0.0002
7 3 10 -0.0055 -0.0005
7 3 11 -0.4055 -0.0004
7 4 0 1.2878 -0.0006
7 4 1 0.9149 -0.0006
7 4 2 0.2531 -0.0005
7 4 3 -0.5242 -0.0002
7 4 4 -1.1933 0.0001
7 4 5 -1.5987 0.0002
7 4 6 -1.7090 -0.0000
7 4 7 -1.5505 -0.0003
7 4 8 -1.1196 -0.0002
7 4 9 -0.4464 0.0005
7 4 10 0.2500 0.0013
7 4 11 0.6173 0.0015
7 5 0 -1.2945 -0.0005
7 5 1 -0.8576 -0.0002
7 5 2 -0.1640 0.0001
7 5 3 0.5759 0.0001
7 5 4 1.1433 -0.0001
7 5 5 1.4337 -0.0003
7 5 6 1.4612 0.0000
7 5 7 1.2669 0.0005
7 5 8 0.8498 0.0005
7 5 9 0.2354 -0.0003
7 5 10 -0.3890 -0.0014
7 5 11 -0.7140 -0.0018
7 5 12 -0.5851 -0.0013
7 6 0 1.2312 0.0025
7 6 1 0.7651 0.0018
7 6 2 0.0603 0.0009
7 6 3 -0.6405 0.0004
7 6 4 -1.1097 0.0003
7 6 5 -1.2826 0.0003
7 6 6 -1.2228 -0.0000
7 6 7 -0.9928 -0.0006
7 6 8 -0.5969 -0.0007
7 6 9 -0.0597 0.0000
7 6 10 0.4627 0.0011
7 6 11 0.7204 0.0016
7 6 12 0.5891 0.0011
7 7 0 -0.9884 -0.0034
7 7 1 -0.5484 -0.0025
7 7 2 0.1063 -0.0012
7 7 3 0.7330 -0.0004
7 7 4 1.1002 -0.0002
7 7 5 1.1616 -0.0003
7 7 6 1.0071 -0.0001
7 7 7 0.7135 0.0003
7 7 8 0.3019 0.0004
7 7 9 -0.1788 -0.0002
7 7 10 -0.5811 -0.0010
7 7 11 -0.7211 -0.0012
7 8 0 0.7177 0.0029
7 8 1 0.3196 0.0020
7 8 2 -0.2499 0.0008
7 8 3 -0.7801 -0.0001
7 8 4 -1.0554 -0.0002
7 8 5 -1.0353 0.0001
7 8 6 -0.8094 0.0003
7 8 7 -0.4545 0.0002
7 8 8 -0.0120 0.0003
7 8 9 0.4278 0.0006
7 8 10 0.7072 0.0011
7 8 11 0.7048 0.0010
7 9 0 -0.5528 -0.0025
7 9 1 -0.1760 -0.0018
7 9 2 0.3132 -0.0007
7 9 3 0.7507 0.0002
7 9 4 0.9602 0.0004
7 9 5 0.9093 0.0000
7 9 6 0.6728 -0.0003
7 9 7 0.3113 -0.0005
7 9 8 -0.1263 -0.0007
7 9 9 -0.5186 -0.0009
7 9 10 -0.6965 -0.0011
7 9 11 -0.5879 -0.0009
7 10 0 0.3859 0.0025
7 10 1 0.0375 0.0020
7 10 2 -0.3587 0.0010
7 10 3 -0.6859 0.0001
7 10 4 -0.8256 -0.0005
7 10 5 -0.7680 -0.0004
7 10 6 -0.5735 -0.0000
7 10 7 -0.2757 0.0004
7 10 8 0.0940 0.0007
7 10 9 0.4153 0.0009
7 10 10 0.5235 0.0010
7 11 0 -0.1239 -0.0015
7 11 1 0.1489 -0.0014
7 11 2 0.4129 -0.0007
7 11 3 0.5925 0.0003
7 11 4 0.6330 0.0010
7 11 5 0.5589 0.0010
7 11 6 0.4252 0.0006
7 11 7 0.2363 -0.0001
7 11 8 -0.0139 -0.0006
7 11 9 -0.2410 -0.0008
7 12 1 -0.2443 -0.0000
7 12 2 -0.3769 -0.0003
7 12 3 -0.4248 -0.0009
7 12 4 -0.3808 -0.0015
7 12 5 -0.2981 -0.0014
7 12 6 -0.2308 -0.0008
7 12 7 -0.1623 0.0001
8 -5 0 -0.1092 0.0006
8 -5 1 0.1883 0.0005
8 -5 2 0.3881 0.0004
8 -4 0 0.2318 -0.0017
8 -4 1 -0.2052 -0.0013
8 -4 2 -0.5504 -0.0006
8 -4 3 -0.6213 0.0000
8 -4 4 -0.4563 0.0004
8 -3 0 -0.3095 0.0030
8 -3 1 0.1668 0.0022
8 -3 2 0.5874 0.0011
8 -3 3 0.7303 -0.0000
8 -3 4 0.5772 -0.0006
8 -3 5 0.2931 -0.0005
8 -2 0 0.3840 -0.0032
8 -2 1 -0.0654 -0.0024
8 -2 2 -0.5019 -0.0012
8 -2 3 -0.7332 -0.0001
8 -2 4 -0.6880 0.0004
8 -2 5 -0.4418 0.0003
8 -2 6 -0.1476 -0.0002
8 -2 7 0.0423 -0.0006
8 -1 0 -0.4499 0.0018
8 -1 1 -0.0038 0.0013
8 -1 2 0.4400 0.0006
8 -1 3 0.7637 -0.0000
8 -1 4 0.8775 -0.0002
8 -1 5 0.7482 0.0000
8 -1 6 0.4279 0.0005
8 -1 7 0.0797 0.0009
8 0 0 0.3641 -0.0001
8 0 1 -0.1187 0.0001
8 0 2 -0.5520 0.0003
8 0 3 -0.8929 0.0004
8 0 4 -1.0811 0.0003
8 0 5 -1.0291 -0.0001
8 0 6 -0.6966 -0.0005
8 0 7 -0.2164 -0.0008
8 0 8 0.1388 -0.0009
8 1 0 -0.0548 -0.0003
8 1 1 0.4386 -0.0003
8 1 2 0.7959 -0.0002
8 1 3 1.0181 -0.0003
8 1 4 1.1053 -0.0002
8 1 5 0.9985 -0.0000
8 1 6 0.6323 0.0002
8 1 7 0.0976 0.0003
8 1 8 -0.3276 0.0003
8 1 9 -0.4153 0.0003
8 2 0 -0.2919 -0.0005
8 2 1 -0.7344 -0.0006
8 2 2 -0.9703 -0.0005
8 2 3 -1.0086 -0.0003
8 2 4 -0.8995 -0.0002
8 2 5 -0.6541 -0.0001
8 2 6 -0.2458 0.0000
8 2 7 0.2592 0.0002
8 2 8 0.6338 0.0001
8 2 9 0.6701 -0.0000
8 3 0 0.4462 0.0004
8 3 1 0.8141 0.0005
8 3 2 0.9620 0.0005
8 3 3 0.8898 0.0004
8 3 4 0.6556 0.0003
8 3 5 0.3146 0.0002
8 3 6 -0.1076 -0.0000
8 3 7 -0.5425 -0.0002
8 3 8 -0.8190 -0.0001
8 3 9 -0.7838 0.0005
8 3 10 -0.4961 0.0009
8 4 0 -0.4482 0.0008
8 4 1 -0.7500 0.0007
8 4 2 -0.8610 0.0005
8 4 3 -0.7829 0.0002
8 4 4 -0.5487 -0.0001
8 4 5 -0.2021 -0.0002
8 4 6 0.2072 0.0000
8 4 7 0.5901 0.0002
8 4 8 0.7996 -0.0003
8 4 9 0.7250 -0.0013
8 4 10 0.4367 -0.0022
8 5 0 0.4977 -0.0015
8 5 1 0.7292 -0.0015
8 5 2 0.7930 -0.0011
8 5 3 0.7177 -0.0006
8 5 4 0.5171 -0.0000
8 5 5 0.1952 0.0001
8 5 6 -0.2047 -0.0001
8 5 7 -0.5709 -0.0003
8 5 8 -0.7525 0.0003
8 5 9 -0.6604 0.0017
8 5 10 -0.3745 0.0029
8 6 0 -0.6217 0.0009
8 6 1 -0.7790 0.0011
8 6 2 -0.7578 0.0008
8 6 3 -0.6278 0.0002
8 6 4 -0.4148 -0.0003
8 6 5 -0.0990 -0.0003
8 6 6 0.2913 0.0002
8 6 7 0.6351 0.0005
8 6 8 0.7810 -0.0001
8 6 9 0.6630 -0.0015
8 6 10 0.3726 -0.0028
8 7 0 0.6910 -0.0004
8 7 1 0.8017 -0.0007
8 7 2 0.7056 -0.0006
8 7 3 0.5007 -0.0001
8 7 4 0.2495 0.0005
8 7 5 -0.0580 0.0004
8 7 6 -0.4007 -0.0002
8 7 7 -0.6686 -0.0006
8 7 8 -0.7392 -0.0001
8 7 9 -0.5893 0.0012
8 7 10 -0.3239 0.0024
8 8 0 -0.6829 0.0006
8 8 1 -0.7762 0.0010
8 8 2 -0.6475 0.0010
8 8 3 -0.3962 0.0004
8 8 4 -0.1211 -0.0001
8 8 5 0.1549 -0.0002
8 8 6 0.4064 0.0003
8 8 7 0.5506 0.0005
8 8 8 0.5212 0.0000
8 8 9 0.3543 -0.0012
8 8 10 0.1645 -0.0021
8 9 0 0.6684 -0.0000
8 9 1 0.7341 -0.0005
8 9 2 0.5899 -0.0008
8 9 3 0.3165 -0.0006
8 9 4 0.0304 -0.0002
8 9 5 -0.2112 -0.0001
8 9 6 -0.3716 -0.0004
8 9 7 -0.3970 -0.0005
8 9 8 -0.2799 0.0001
8 9 9 -0.1123 0.0012
8 10 0 -0.6035 -0.0015
8 10 1 -0.6223 -0.0009
8 10 2 -0.4701 -0.0001
8 10 3 -0.2007 0.0004
8 10 4 0.0774 0.0005
8 10 5 0.2909 0.0006
8 10 6 0.3943 0.0008
8 10 7 0.3502 0.0007
8 10 8 0.1862 0.0001
8 11 1 0.3898 0.0015
8 11 2 0.2705 0.0004
8 11 3 0.0648 -0.0006
8 11 4 -0.1508 -0.0012
8 11 5 -0.3158 -0.0014
8 11 6 -0.3879 -0.0013
8 11 7 -0.3328 -0.0010
9 -4 0 -0.3706 -0.0020
9 -3 0 0.5814 0.0006
9 -3 1 0.4015 0.0004
9 -3 2 0.1486 0.0004
9 -2 0 -0.8040 0.0014
9 -2 1 -0.6859 0.0013
9 -2 2 -0.3937 0.0006
9 -2 3 -0.1017 -0.0001
9 -2 4 0.0773 -0.0003
9 -1 0 1.0473 -0.0024
9 -1 1 0.9958 -0.0021
9 -1 2 0.6837 -0.0011
9 -1 3 0.2602 -0.0001
9 -1 4 -0.0950 0.0002
9 -1 5 -0.2563 -0.0000
9 0 0 -1.1793 0.0019
9 0 1 -1.1252 0.0016
9 0 2 -0.7956 0.0007
9 0 3 -0.2849 -0.0003
9 0 4 0.2110 -0.0006
9 0 5 0.4890 -0.0003
9 0 6 0.4654 0.0003
9 1 0 1.0318 -0.0013
9 1 1 0.9363 -0.0011
9 1 2 0.6316 -0.0002
9 1 3 0.1536 0.0007
9 1 4 -0.3437 0.0010
9 1 5 -0.6523 0.0006
9 1 6 -0.6467 0.0001
9 1 7 -0.4049 -0.0002
9 2 0 -0.6682 0.0014
9 2 1 -0.5588 0.0013
9 2 2 -0.3330 0.0005
9 2 3 0.0118 -0.0004
9 2 4 0.3843 -0.0007
9 2 5 0.6282 -0.0005
9 2 6 0.6226 -0.0002
9 2 7 0.4005 -0.0000
9 2 8 0.1473 -0.0000
9 3 0 0.3561 -0.0014
9 3 1 0.2578 -0.0014
9 3 2 0.0951 -0.0008
9 3 3 -0.1441 -0.0001
9 3 4 -0.3985 0.0003
9 3 5 -0.5607 0.0001
9 3 6 -0.5423 -0.0001
9 3 7 -0.3532 -0.0002
9 3 8 -0.1201 -0.0002
9 4 0 -0.2318 0.0007
9 4 1 -0.1285 0.0007
9 4 2 0.0439 0.0004
9 4 3 0.2888 -0.0001
9 4 4 0.5236 -0.0002
9 4 5 0.6443 0.0000
9 4 6 0.5962 0.0003
9 4 7 0.4055 0.0004
9 4 8 0.1730 0.0005
9 5 0 0.1741 -0.0000
9 5 1 0.0531 -0.0000
9 5 2 -0.1555 0.0002
9 5 3 -0.4518 0.0003
9 5 4 -0.7123 0.0003
9 5 5 -0.8029 0.0000
9 5 6 -0.6924 -0.0003
9 5 7 -0.4552 -0.0004
9 5 8 -0.2062 -0.0008
9 5 9 -0.0361 -0.0012
9 6 0 -0.0532 0.0002
9 6 1 0.0674 0.0000
9 6 2 0.2628 -0.0001
9 6 3 0.5466 -0.0001
9 6 4 0.7797 0.0000
9 6 5 0.8057 0.0001
9 6 6 0.6117 0.0001
9 6 7 0.3229 0.0002
9 6 8 0.0808 0.0006
9 6 9 -0.0451 0.0012
9 7 0 -0.0866 -0.0001
9 7 1 -0.1976 0.0002
9 7 2 -0.3375 0.0000
9 7 3 -0.5380 -0.0003
9 7 4 -0.6842 -0.0004
9 7 5 -0.6305 -0.0003
9 7 6 -0.3801 0.0000
9 7 7 -0.0841 0.0000
9 7 8 0.1112 -0.0003
9 8 0 0.1553 -0.0009
9 8 1 0.2761 -0.0011
9 8 2 0.3769 -0.0006
9 8 3 0.4937 0.0002
9 8 4 0.5570 0.0005
9 8 5 0.4604 0.0003
9 8 6 0.2181 -0.0002
9 8 7 -0.0289 -0.0003
9 8 8 -0.1610 0.0001
9 9 0 -0.1547 0.0015
9 9 1 -0.2903 0.0016
9 9 2 -0.3779 0.0010
9 9 3 -0.4411 0.0000
9 9 4 -0.4544 -0.0005
9 9 5 -0.3601 -0.0003
9 9 6 -0.1777 0.0003
9 9 7 -0.0124 0.0005
9 10 1 0.2352 -0.0008
9 10 2 0.3010 -0.0005
9 10 3 0.3206 0.0002
9 10 4 0.2999 0.0005
9 10 5 0.2239 0.0002
10 -1 0 -0.2014 -0.0015
10 -1 1 -0.3949 -0.0008
10 0 0 0.3470 0.0013
10 0 1 0.6271 0.0007
10 0 2 0.6765 0.0001
10 0 3 0.5053 -0.0002
10 1 0 -0.3723 -0.0012
10 1 1 -0.6571 -0.0007
10 1 2 -0.7333 -0.0004
10 1 3 -0.5696 -0.0003
10 1 4 -0.2823 -0.0004
10 2 0 0.2333 0.0009
10 2 1 0.4851 0.0004
10 2 2 0.6045 0.0003
10 2 3 0.5261 0.0005
10 2 4 0.3115 0.0007
10 2 5 0.0985 0.0007
10 3 0 -0.0793 -0.0005
10 3 1 -0.2982 -0.0000
10 3 2 -0.4479 -0.0000
10 3 3 -0.4560 -0.0003
10 3 4 -0.3413 -0.0005
10 3 5 -0.1845 -0.0004
10 4 0 0.0511 0.0004
10 4 1 0.2285 0.0000
10 4 2 0.3465 -0.0000
10 4 3 0.3538 0.0002
10 4 4 0.2751 0.0003
10 4 5 0.1641 0.0000
10 4 6 0.0632 -0.0004
10 5 0 -0.0982 -0.0003
10 5 1 -0.2235 -0.0001
10 5 2 -0.2644 -0.0001
10 5 3 -0.1958 -0.0004
10 5 4 -0.0859 -0.0004
10 5 5 -0.0022 0.0000
10 5 6 0.0463 0.0005
10 6 0 0.0910 -0.0004
10 6 1 0.1832 -0.0004
10 6 2 0.1775 -0.0002
10 6 3 0.0535 0.0002
10 6 4 -0.0833 0.0003
10 6 5 -0.1364 0.0001
10 6 6 -0.1184 -0.0004
10 7 0 -0.0143 0.0011
10 7 1 -0.1032 0.0009
10 7 2 -0.1144 0.0007
10 7 3 -0.0088 0.0002
10 7 4 0.1074 -0.0001
10 7 5 0.1237 -0.0000
10 8 1 0.0377 -0.0007
10 8 2 0.0814 -0.0007
10 8 3 0.0272 -0.0005
10 8 4 -0.0492 -0.0002
0 0 0 0.0 0.0
;
loop_
  _diffrn_refln_index_h
  _diffrn_refln_index_k
  _diffrn_refln_index_l
  _diffrn_refln_intensity_net
  _diffrn_refln_intensity_u
 1 -1 -1 641.29 14.42
 1 -1 -1 569.88 13.77
 -1 1 1 657.77 14.2
 -1 1 1 649.69 14.39
 -1 1 1 637.22 15
 -1 1 1 651.2 14.39
 2 -2 -2 513.11 12.47
 2 -2 -2 480.76 11.68
 -2 2 2 538.13 13.11
 -2 2 2 527.09 12.48
 -2 2 2 545.62 12.4
 -2 2 2 514.93 13.1
 3 -3 -3 67.39 1.49
 3 -3 -3 63.25 1.43
 -3 3 3 69 1.48
 -3 3 3 64.71 1.56
 -3 3 3 65.71 1.51
 -3 3 3 70.04 1.48
 -4 4 4 0.63 0.1
 -4 4 4 0.71 0.1
 -4 4 4 0.68 0.11
 5 -5 -5 2.41 0.11
 -5 5 5 2.39 0.17
 6 -6 -6 2.04 0.11
 -6 6 6 2.49 0.2
 -7 6 7 0.25 0.12
 7 -6 -7 0.31 0.07
 -6 5 6 1.8 0.17
 6 -5 -6 1.44 0.1
 -5 4 5 1.24 0.16
 5 -4 -5 0.81 0.07
 -4 3 4 0.5 0.09
 -4 3 4 0.41 0.08
 4 -3 -4 0.46 0.08
 -3 2 3 32.76 0.75
 -3 2 3 31.97 0.74
 -3 2 3 31.84 0.78
 3 -2 -3 32.26 0.76
 3 -2 -3 32.09 0.72
 -2 1 2 7.29 0.21
 -2 1 2 7.2 0.19
 -2 1 2 6.78 0.2
 2 -1 -2 7.35 0.18
 2 -1 -2 7.09 0.18
 2 -1 -2 7.14 0.2
 -1 0 1 127.15 3.16
 -1 0 1 115.77 2.61
 -1 0 1 121.85 2.63
 1 0 -1 118.18 2.61
 1 0 -1 123.88 3.11
 1 0 -1 119.86 2.92
 0 -1 0 18.99 0.42
 0 1 0 19.64 0.44
 0 1 0 19 0.42
 0 1 0 19.21 0.38
 1 -2 -1 102.18 2.19
 1 -2 -1 99.71 2.23
 -1 2 1 102.64 2.23
 -1 2 1 105.79 2.35
 2 -3 -2 6.16 0.16
 2 -3 -2 6.1 0.18
 -2 3 2 6.32 0.18
 -2 3 2 5.79 0.17
 -2 3 2 5.59 0.19
 3 -4 -3 2.46 0.12
 -3 4 3 2.32 0.12
 -3 4 3 2.51 0.13
 -3 4 3 2.57 0.12
 -4 5 4 1.63 0.13
 -4 5 4 1.57 0.12
 5 -6 -5 1.4 0.09
 -5 6 5 1.92 0.21
 -5 6 5 1.67 0.15
 6 -7 -6 0.64 0.09
 -6 7 6 0.67 0.16
 -7 5 7 0.07 0.08
 7 -5 -7 0 0.04
 -6 4 6 0.46 0.12
 6 -4 -6 0.32 0.07
 -5 3 5 1.26 0.12
 -4 2 4 14.42 0.41
 -4 2 4 14.31 0.43
 4 -2 -4 14.22 0.36
 4 -2 -4 14.16 0.4
 -3 1 3 1.4 0.07
 -3 1 3 1.41 0.08
 3 -1 -3 1.34 0.06
 3 -1 -3 1.26 0.07
 3 -1 -3 1.32 0.06
 3 -1 -3 1.32 0.08
 -2 0 2 2.81 0.09
 -2 0 2 2.66 0.11
 -2 0 2 2.79 0.1
 2 0 -2 2.79 0.1
 2 0 -2 2.78 0.09
 2 0 -2 2.7 0.09
 2 0 -2 2.89 0.1
 -1 -1 1 28.54 0.64
 -1 -1 1 29.12 0.64
 -1 -1 1 28.68 0.66
 1 1 -1 28.6 0.66
 1 1 -1 28.63 0.62
 1 1 -1 29.34 0.74
 0 -2 0 14.85 0.32
 0 -2 0 14.73 0.34
 0 -2 0 14.6 0.3
 0 2 0 14.92 0.3
 0 2 0 14.54 0.34
 0 2 0 15.26 0.36
 1 -3 -1 59.38 1.27
 1 -3 -1 57.98 1.27
 -1 3 1 59.18 1.35
 -1 3 1 58.72 1.27
 2 -4 -2 70.59 1.55
 2 -4 -2 73.87 1.6
 -2 4 2 73.6 1.58
 -2 4 2 74.53 1.6
 -2 4 2 70.54 1.67
 3 -5 -3 3.48 0.15
 -3 5 3 3.47 0.15
 -3 5 3 3.12 0.16
 -3 5 3 3.29 0.16
 4 -6 -4 6.52 0.2
 -4 6 4 6.23 0.27
 -4 6 4 6.3 0.27
 5 -7 -5 25.89 0.63
 -5 7 5 26.15 0.79
 -5 7 5 27.31 0.78
 6 -8 -6 0.02 0.04
 -6 8 6 -0.02 0.08
 -6 8 6 -0.03 0.08
 -7 4 7 1.5 0.21
 7 -4 -7 1.22 0.1
 -6 3 6 1.62 0.19
 6 -3 -6 1.43 0.1
 -5 2 5 0.53 0.1
 -5 2 5 0.75 0.12
 5 -2 -5 0.52 0.07
 -4 1 4 2.11 0.13
 -4 1 4 2.02 0.12
 4 -1 -4 2.19 0.1
 4 -1 -4 2.28 0.09
 4 -1 -4 2.12 0.11
 4 -1 -4 2.05 0.11
 -3 0 3 10.17 0.29
 3 0 -3 10.33 0.29
 3 0 -3 10.16 0.29
 3 0 -3 10.66 0.27
 3 0 -3 10.07 0.27
 -2 -1 2 14.99 0.38
 -2 -1 2 16.16 0.37
 -2 -1 2 15.11 0.37
 2 1 -2 15.07 0.38
 2 1 -2 14.86 0.37
 2 1 -2 15.9 0.37
 -1 -2 1 173.25 4.71
 -1 -2 1 173.1 4.38
 -1 -2 1 184.11 4.39
 -1 -2 1 170.26 4.1
 1 2 -1 172.6 4.5
 1 2 -1 173 3.69
 1 2 -1 171.94 3.92
 0 -3 0 29.42 0.62
 0 -3 0 31.63 0.69
 0 -3 0 31.42 0.7
 0 3 0 30.96 0.73
 1 -4 -1 9 0.23
 1 -4 -1 9.02 0.22
 -1 4 1 8.47 0.26
 -1 4 1 8.92 0.25
 2 -5 -2 0.88 0.07
 2 -5 -2 0.98 0.05
 -2 5 2 1.02 0.07
 -2 5 2 1.07 0.08
 -3 6 3 5.33 0.22
 -3 6 3 5.39 0.23
 4 -7 -4 13.25 0.35
 -4 7 4 12.85 0.45
 -4 7 4 12.97 0.44
 5 -8 -5 3.95 0.15
 -5 8 5 4.06 0.25
 -5 8 5 4.39 0.25
 -8 4 8 0.25 0.12
 8 -4 -8 0.35 0.08
 -7 3 7 -0.05 0.07
 7 -3 -7 0.1 0.06
 -6 2 6 0.08 0.07
 6 -2 -6 0.01 0.04
 -5 1 5 7.95 0.29
 -5 1 5 7.43 0.3
 5 -1 -5 7.82 0.24
 -4 0 4 0.73 0.1
 -4 0 4 0.81 0.1
 4 0 -4 0.75 0.09
 4 0 -4 0.57 0.05
 4 0 -4 0.68 0.08
 4 0 -4 0.55 0.06
 -3 -1 3 34.38 0.83
 -3 -1 3 36.04 0.81
 3 1 -3 34.61 0.81
 3 1 -3 35.33 0.84
 3 1 -3 34.56 0.79
 3 1 -3 34.6 0.79
 -2 -2 2 14.9 0.36
 -2 -2 2 14.45 0.37
 -2 -2 2 14.52 0.38
 2 2 -2 14.74 0.36
 2 2 -2 14.39 0.36
 2 2 -2 14.97 0.38
 -1 -3 1 6.23 0.18
 -1 -3 1 6.67 0.16
 -1 -3 1 6.28 0.17
 1 3 -1 6.13 0.16
 1 3 -1 6.13 0.19
 1 3 -1 6.22 0.18
 0 -4 0 3.91 0.1
 0 -4 0 4.01 0.13
 0 -4 0 3.91 0.11
 0 -4 0 4 0.12
 0 4 0 4.04 0.14
 1 -5 -1 40.5 0.89
 1 -5 -1 39.18 0.85
 -1 5 1 38.95 0.96
 -1 5 1 38.69 0.9
 2 -6 -2 20.68 0.52
 -2 6 2 20.53 0.54
 -2 6 2 20.4 0.57
 3 -7 -3 1.01 0.07
 -3 7 3 1.23 0.11
 4 -8 -4 4.41 0.16
 -4 8 4 4.23 0.24
 -4 8 4 4.21 0.23
 5 -9 -5 0.58 0.08
 -5 9 5 0.48 0.14
 -5 9 5 0.49 0.14
 -8 3 8 7.67 0.39
 8 -3 -8 7.59 0.27
 -7 2 7 0.18 0.1
 7 -2 -7 0.18 0.07
 -6 1 6 24.33 0.7
 6 -1 -6 23.42 0.6
 -5 0 5 13.63 0.4
 -5 0 5 12.02 0.4
 5 0 -5 12.29 0.38
 5 0 -5 12.59 0.33
 5 0 -5 11.65 0.34
 -4 -1 4 0.16 0.05
 -4 -1 4 0.05 0.03
 4 1 -4 0.15 0.04
 4 1 -4 0.11 0.04
 4 1 -4 0.17 0.04
 -3 -2 3 3.31 0.15
 -3 -2 3 3.78 0.14
 -3 -2 3 3.71 0.15
 3 2 -3 3.91 0.14
 3 2 -3 3.98 0.15
 3 2 -3 3.74 0.14
 -2 -3 2 10.36 0.27
 -2 -3 2 10.86 0.29
 -2 -3 2 10.79 0.29
 2 3 -2 10.33 0.28
 2 3 -2 10.79 0.3
 2 3 -2 10.83 0.29
 -1 -4 1 39.95 0.89
 -1 -4 1 37.14 0.83
 -1 -4 1 37.22 0.86
 1 4 -1 37.87 0.91
 1 4 -1 39.21 0.86
 1 4 -1 37.32 0.84
 0 -5 0 6.59 0.17
 0 -5 0 6.52 0.16
 0 -5 0 6.56 0.2
 0 -5 0 6.66 0.19
 0 5 0 6.69 0.21
 0 5 0 6.37 0.22
 1 -6 -1 21.72 0.5
 1 -6 -1 22.78 0.54
 -1 6 1 22.42 0.57
 -1 6 1 21.93 0.6
 -2 7 2 18.26 0.54
 3 -8 -3 5.97 0.2
 -3 8 3 6.23 0.28
 4 -9 -4 0.91 0.08
 -4 9 4 1.09 0.16
 -4 9 4 1.45 0.19
 -5 10 5 0.14 0.11
 -8 2 8 5.26 0.31
 8 -2 -8 5.36 0.22
 -7 1 7 1.18 0.18
 7 -1 -7 1.31 0.14
 -6 0 6 33.16 0.9
 6 0 -6 32.62 0.8
 -5 -1 5 19.03 0.53
 -5 -1 5 18.61 0.55
 5 1 -5 19 0.48
 5 1 -5 18.96 0.49
 5 1 -5 18.7 0.52
 5 1 -5 18.8 0.53
 -4 -2 4 7.63 0.26
 -4 -2 4 7.45 0.27
 4 2 -4 7.49 0.24
 4 2 -4 8.03 0.24
 4 2 -4 8.18 0.26
 -3 -3 3 44.21 1.02
 -3 -3 3 45.45 1.04
 -3 -3 3 43.42 1.08
 3 3 -3 47.05 1.09
 3 3 -3 46.07 1.03
 3 3 -3 45.22 1.02
 -2 -4 2 32.16 0.71
 -2 -4 2 32.1 0.76
 -2 -4 2 31.15 0.74
 2 4 -2 31.81 0.74
 2 4 -2 31.72 0.73
 2 4 -2 30.99 0.79
 -1 -5 1 27.79 0.64
 -1 -5 1 25.58 0.6
 -1 -5 1 26.18 0.55
 -1 -5 1 26.32 0.63
 1 5 -1 27.4 0.69
 1 5 -1 27.15 0.64
 1 5 -1 26.58 0.61
 0 -6 0 0.45 0.04
 0 -6 0 0.61 0.07
 0 -6 0 0.48 0.03
 0 -6 0 0.49 0.04
 0 6 0 0.68 0.09
 0 6 0 0.57 0.08
 1 -7 -1 1.06 0.08
 -1 7 1 1.18 0.13
 -1 7 1 1.01 0.1
 2 -8 -2 9.19 0.26
 -2 8 2 8.96 0.34
 3 -9 -3 4.25 0.16
 -3 9 3 4.03 0.23
 4 -10 -4 2.18 0.11
 -4 10 4 2.14 0.18
 -4 10 4 2.05 0.19
 -8 1 8 0.91 0.19
 8 -1 -8 1.1 0.14
 -7 0 7 2.16 0.19
 7 0 -7 1.84 0.13
 -6 -1 6 11.7 0.4
 -6 -1 6 12.21 0.43
 6 1 -6 11.97 0.36
 -5 -2 5 5.67 0.24
 -5 -2 5 5.95 0.24
 5 2 -5 5.84 0.21
 5 2 -5 5.72 0.2
 5 2 -5 5.92 0.23
 -4 -3 4 6.65 0.25
 -4 -3 4 6.56 0.23
 -4 -3 4 6.86 0.25
 4 3 -4 6.73 0.23
 4 3 -4 7.06 0.23
 4 3 -4 6.71 0.24
 -3 -4 3 0.05 0.03
 -3 -4 3 0.01 0.03
 3 4 -3 0.04 0.03
 3 4 -3 -0.01 0.02
 -2 -5 2 11.89 0.33
 -2 -5 2 11.6 0.33
 -2 -5 2 11.83 0.3
 2 5 -2 11.63 0.31
 2 5 -2 12.19 0.34
 2 5 -2 11.99 0.36
 -1 -6 1 5.02 0.16
 -1 -6 1 5.04 0.18
 -1 -6 1 5.14 0.14
 -1 -6 1 5.18 0.17
 1 6 -1 5.29 0.2
 1 6 -1 5 0.21
 1 6 -1 4.98 0.15
 0 -7 0 11.13 0.3
 0 -7 0 10.91 0.31
 0 -7 0 10.5 0.27
 0 7 0 10.63 0.34
 0 7 0 10.93 0.36
 1 -8 -1 0.06 0.03
 -1 8 1 -0.04 0.04
 2 -9 -2 0.1 0.05
 -2 9 2 -0.02 0.05
 3 -10 -3 5.17 0.19
 -3 10 3 5.17 0.28
 -8 0 8 5.41 0.31
 8 0 -8 5.18 0.23
 -7 -1 7 47.53 1.22
 7 1 -7 45.56 1.11
 -6 -2 6 14.8 0.49
 -6 -2 6 14.77 0.47
 6 2 -6 15.15 0.44
 -5 -3 5 0.86 0.12
 -5 -3 5 1.06 0.13
 -5 -3 5 0.97 0.13
 5 3 -5 1.04 0.12
 5 3 -5 0.79 0.09
 5 3 -5 1.02 0.13
 -4 -4 4 13.72 0.41
 -4 -4 4 13.75 0.4
 -4 -4 4 13.53 0.38
 4 4 -4 13.37 0.38
 4 4 -4 13.59 0.39
 -3 -5 3 10.53 0.29
 3 5 -3 10.61 0.35
 3 5 -3 10.5 0.32
 3 5 -3 11.1 0.31
 -2 -6 2 1.05 0.08
 -2 -6 2 1.15 0.07
 -2 -6 2 1.08 0.07
 2 6 -2 1 0.08
 2 6 -2 1.14 0.07
 2 6 -2 1.07 0.09
 -1 -7 1 0.35 0.06
 -1 -7 1 0.47 0.06
 -1 -7 1 0.43 0.06
 -1 -7 1 0.34 0.06
 -1 -7 1 0.32 0.04
 1 7 -1 0.27 0.04
 1 7 -1 0.23 0.07
 1 7 -1 0.48 0.09
 0 -8 0 0.14 0.04
 0 8 0 0.1 0.05
 0 8 0 0.12 0.06
 1 -9 -1 3.42 0.13
 -1 9 1 3 0.19
 2 -10 -2 2.32 0.12
 -2 10 2 2.4 0.18
 3 -11 -3 0.6 0.09
 -3 11 3 0.48 0.13
 -8 -1 8 12.43 0.49
 8 1 -8 12.57 0.41
 -7 -2 7 18.22 0.59
 -7 -2 7 17.66 0.59
 7 2 -7 17.34 0.52
 -6 -3 6 0.59 0.12
 -6 -3 6 0.68 0.13
 -6 -3 6 0.6 0.12
 6 3 -6 0.5 0.1
 -5 -4 5 6.88 0.28
 -5 -4 5 7 0.27
 -5 -4 5 7.06 0.26
 5 4 -5 7.47 0.25
 5 4 -5 6.95 0.26
 -4 -5 4 0.01 0.04
 -4 -5 4 0.01 0.04
 -4 -5 4 0.02 0.04
 4 5 -4 0.14 0.06
 4 5 -4 0.02 0.03
 4 5 -4 0.02 0.04
 -3 -6 3 2.15 0.1
 3 6 -3 1.93 0.11
 3 6 -3 2.13 0.14
 3 6 -3 2.15 0.13
 -2 -7 2 4.76 0.15
 -2 -7 2 4.95 0.18
 -2 -7 2 5.3 0.2
 -2 -7 2 4.94 0.17
 2 7 -2 5.2 0.18
 2 7 -2 4.83 0.21
 2 7 -2 4.9 0.23
 -1 -8 1 0.25 0.05
 -1 -8 1 0.24 0.04
 1 8 -1 0.18 0.07
 1 8 -1 0.17 0.04
 1 8 -1 0.38 0.09
 0 -9 0 3.77 0.12
 0 -9 0 3.8 0.13
 0 9 0 3.81 0.21
 1 -10 -1 0.12 0.05
 -1 10 1 0.12 0.08
 2 -11 -2 0.24 0.06
 -2 11 2 0.08 0.09
 8 2 -8 0.63 0.13
 -7 -3 7 0.98 0.17
 -7 -3 7 0.8 0.15
 7 3 -7 1 0.15
 -6 -4 6 4.55 0.23
 -6 -4 6 4.2 0.23
 -6 -4 6 4.93 0.22
 6 4 -6 4.55 0.22
 -5 -5 5 2.32 0.15
 -5 -5 5 2.32 0.15
 -5 -5 5 2.48 0.14
 5 5 -5 2.43 0.15
 5 5 -5 2.44 0.14
 -4 -6 4 2.33 0.14
 -4 -6 4 2.6 0.13
 -4 -6 4 2.3 0.13
 4 6 -4 2.37 0.13
 4 6 -4 2.26 0.15
 4 6 -4 2.44 0.15
 -3 -7 3 9.24 0.27
 3 7 -3 9.72 0.3
 3 7 -3 8.96 0.34
 3 7 -3 9.93 0.33
 -2 -8 2 12.61 0.34
 -2 -8 2 12.78 0.3
 2 8 -2 12.4 0.4
 2 8 -2 12.19 0.43
 2 8 -2 12.25 0.35
 -1 -9 1 1.89 0.08
 -1 -9 1 1.96 0.1
 1 9 -1 1.93 0.1
 1 9 -1 1.86 0.15
 0 -10 0 0.27 0.06
 0 10 0 0.23 0.09
 1 -11 -1 1.63 0.1
 -1 11 1 1.74 0.17
 2 -12 -2 0.2 0.07
 -2 12 2 0.31 0.13
 8 3 -8 5.35 0.26
 -7 -4 7 2.86 0.19
 7 4 -7 2.79 0.18
 -6 -5 6 0.07 0.07
 -6 -5 6 0.11 0.07
 6 5 -6 0.12 0.08
 -5 -6 5 1.72 0.12
 -5 -6 5 1.78 0.14
 5 6 -5 1.89 0.14
 5 6 -5 1.81 0.13
 -4 -7 4 1.56 0.1
 4 7 -4 1.56 0.11
 4 7 -4 1.49 0.14
 4 7 -4 1.43 0.12
 -3 -8 3 30.78 0.66
 -3 -8 3 29.66 0.72
 3 8 -3 30.16 0.77
 3 8 -3 31.17 0.8
 3 8 -3 29.98 0.85
 -2 -9 2 6.94 0.22
 -2 -9 2 6.89 0.2
 2 9 -2 6.92 0.31
 2 9 -2 7.05 0.24
 2 9 -2 7.35 0.3
 -1 -10 1 0.09 0.04
 -1 -10 1 0.05 0.05
 1 10 -1 0.07 0.07
 1 10 -1 0.03 0.04
 0 -11 0 0.39 0.07
 0 11 0 0.59 0.15
 0 11 0 0.29 0.07
 1 -12 -1 2.25 0.12
 -1 12 1 2.43 0.21
 8 4 -8 12.41 0.44
 -7 -5 7 0.05 0.08
 7 5 -7 0.11 0.09
 -6 -6 6 12.21 0.39
 6 6 -6 12.02 0.42
 -5 -7 5 4.06 0.18
 5 7 -5 4.35 0.22
 -4 -8 4 6.58 0.23
 4 8 -4 6.52 0.26
 4 8 -4 6.37 0.3
 4 8 -4 6.46 0.28
 -3 -9 3 12.13 0.34
 -3 -9 3 12.24 0.31
 3 9 -3 11.47 0.41
 3 9 -3 12 0.38
 3 9 -3 11.7 0.44
 -2 -10 2 0.68 0.06
 -2 -10 2 0.69 0.09
 2 10 -2 0.62 0.13
 2 10 -2 0.66 0.09
 -1 -11 1 10.67 0.27
 -1 -11 1 10.96 0.3
 1 11 -1 10.76 0.33
 1 11 -1 10.79 0.44
 0 -12 0 2.02 0.12
 0 12 0 2.28 0.21
 0 12 0 2.13 0.13
 -7 -6 7 5.1 0.24
 7 6 -7 4.77 0.26
 -6 -7 6 26.03 0.68
 6 7 -6 25.79 0.74
 -5 -8 5 0.31 0.08
 5 8 -5 0.28 0.1
 -4 -9 4 0.34 0.08
 4 9 -4 0.18 0.07
 4 9 -4 0.29 0.1
 -3 -10 3 3.91 0.15
 -3 -10 3 4.12 0.17
 3 10 -3 4.01 0.2
 3 10 -3 4.17 0.25
 -2 -11 2 0.25 0.07
 -2 -11 2 0.3 0.06
 2 11 -2 0.17 0.07
 2 11 -2 0.33 0.12
 -1 -12 1 0.41 0.08
 1 12 -1 0.25 0.07
 1 12 -1 0.47 0.14
 -7 -7 7 3.01 0.18
 7 7 -7 2.94 0.21
 -6 -8 6 0.38 0.1
 6 8 -6 0.59 0.14
 -5 -9 5 0.43 0.1
 5 9 -5 0.5 0.14
 -4 -10 4 7.71 0.26
 -4 -10 4 7.28 0.23
 4 10 -4 7.47 0.34
 -3 -11 3 0.9 0.12
 -3 -11 3 0.59 0.08
 3 11 -3 0.63 0.11
 -2 -12 2 1.27 0.08
 -2 -12 2 1.43 0.1
 2 12 -2 1.35 0.12
 -6 -9 6 0.08 0.08
 6 9 -6 0.07 0.1
 -5 -10 5 3.25 0.17
 -5 -10 5 3.36 0.15
 5 10 -5 3.34 0.24
 -4 -11 4 0.11 0.06
 -4 -11 4 0.22 0.09
 -3 -12 2 -0.08 0.06
 -3 -12 2 -0.04 0.04
 4 11 -3 13.08 0.49
 -4 -11 3 12.73 0.38
 -4 -11 3 12.93 0.34
 5 10 -4 4.18 0.25
 -5 -10 4 4.41 0.2
 6 9 -5 0.02 0.09
 -6 -9 5 -0.03 0.06
 7 8 -6 -0.02 0.08
 -7 -8 6 0.18 0.09
 2 12 -1 4.22 0.2
 -2 -12 1 4.25 0.17
 -2 -12 1 4.14 0.15
 3 11 -2 1.12 0.13
 -3 -11 2 1.49 0.14
 -3 -11 2 0.94 0.08
 4 10 -3 2.19 0.18
 -4 -10 3 2.3 0.12
 -4 -10 3 2.2 0.13
 5 9 -4 -0.03 0.07
 -5 -9 4 0.02 0.06
 6 8 -5 1.71 0.2
 -6 -8 5 1.66 0.13
 7 7 -6 5.56 0.28
 -7 -7 6 5.75 0.25
 8 6 -7 0.94 0.16
 1 12 0 0.34 0.08
 1 12 0 0.73 0.17
 -1 -12 0 0.53 0.09
 2 11 -1 0.75 0.15
 2 11 -1 0.49 0.09
 -2 -11 1 0.62 0.09
 -2 -11 1 0.58 0.07
 3 10 -2 6.06 0.24
 3 10 -2 6.2 0.29
 3 10 -2 6.14 0.31
 -3 -10 2 6.28 0.19
 -3 -10 2 5.83 0.22
 4 9 -3 20.32 0.57
 4 9 -3 19.77 0.6
 -4 -9 3 20.27 0.53
 5 8 -4 0.13 0.08
 -5 -8 4 0.2 0.07
 6 7 -5 0 0.07
 -6 -7 5 -0.01 0.06
 7 6 -6 11.31 0.41
 -7 -6 6 12.12 0.4
 8 5 -7 2.02 0.17
 0 12 1 0.59 0.15
 0 12 1 0.6 0.09
 0 -12 -1 0.68 0.1
 1 11 0 2.4 0.13
 1 11 0 2.38 0.19
 -1 -11 0 2.33 0.12
 -1 -11 0 2.29 0.1
 2 10 -1 0 0.06
 2 10 -1 -0.01 0.04
 2 10 -1 0.07 0.07
 -2 -10 1 0.1 0.05
 -2 -10 1 -0.04 0.03
 3 9 -2 17.09 0.56
 3 9 -2 16.8 0.52
 3 9 -2 17.19 0.48
 -3 -9 2 16.22 0.4
 -3 -9 2 16.92 0.44
 4 8 -3 26.66 0.78
 4 8 -3 27.29 0.71
 4 8 -3 27.62 0.74
 -4 -8 3 26.64 0.66
 5 7 -4 1.78 0.14
 5 7 -4 1.78 0.13
 -5 -7 4 1.78 0.13
 -5 -7 4 1.78 0.12
 6 6 -5 7.07 0.29
 -6 -6 5 7.31 0.3
 -6 -6 5 7.04 0.29
 -6 -6 5 7.49 0.27
 7 5 -6 1.63 0.19
 -7 -5 6 1.46 0.17
 -7 -5 6 1.22 0.17
 -7 -5 6 1.17 0.16
 8 4 -7 18.28 0.56
 -1 12 2 0.17 0.11
 1 -12 -2 0.17 0.07
 0 11 1 0.19 0.1
 0 -11 -1 0.12 0.06
 1 10 0 1.59 0.15
 1 10 0 1.55 0.1
 -1 -10 0 1.51 0.08
 -1 -10 0 1.4 0.09
 2 9 -1 0.51 0.12
 2 9 -1 0.27 0.06
 2 9 -1 0.39 0.1
 -2 -9 1 0.21 0.05
 -2 -9 1 0.23 0.06
 -2 -9 1 0.4 0.07
 3 8 -2 11.99 0.39
 3 8 -2 11.66 0.35
 3 8 -2 12.42 0.43
 -3 -8 2 11.86 0.33
 -3 -8 2 11.61 0.3
 4 7 -3 5.86 0.26
 4 7 -3 5.43 0.23
 4 7 -3 5.62 0.22
 -4 -7 3 5.43 0.22
 -4 -7 3 5.62 0.2
 -4 -7 3 5.66 0.23
 5 6 -4 1.71 0.11
 5 6 -4 1.48 0.12
 -5 -6 4 1.74 0.11
 -5 -6 4 1.7 0.13
 -5 -6 4 1.62 0.12
 6 5 -5 4.8 0.22
 -6 -5 5 4.67 0.23
 -6 -5 5 4.56 0.21
 -6 -5 5 5.08 0.24
 7 4 -6 -0.01 0.06
 -7 -4 6 0.02 0.07
 -7 -4 6 0.04 0.08
 8 3 -7 3.68 0.21
 -8 -3 7 4.1 0.25
 -8 -3 7 4.32 0.26
 -2 12 3 0.3 0.11
 2 -12 -3 0.21 0.07
 -1 11 2 2.37 0.19
 1 -11 -2 2.28 0.12
 0 10 1 0.04 0.07
 0 -10 -1 0.02 0.04
 1 9 0 1.32 0.13
 1 9 0 1.17 0.08
 1 9 0 1.26 0.12
 -1 -9 0 1.23 0.07
 -1 -9 0 1.19 0.08
 2 8 -1 5.25 0.24
 2 8 -1 5.41 0.19
 2 8 -1 5.02 0.22
 -2 -8 1 5.27 0.16
 -2 -8 1 5.16 0.21
 -2 -8 1 5.08 0.18
 3 7 -2 19.88 0.54
 3 7 -2 19.45 0.51
 3 7 -2 19.46 0.58
 -3 -7 2 19.36 0.48
 4 6 -3 12.2 0.36
 4 6 -3 12.04 0.38
 4 6 -3 12.28 0.41
 -4 -6 3 12.12 0.37
 -4 -6 3 12.23 0.37
 -4 -6 3 12.4 0.34
 5 5 -4 0.78 0.09
 5 5 -4 0.68 0.11
 -5 -5 4 0.89 0.11
 -5 -5 4 1.06 0.13
 -5 -5 4 0.54 0.09
 6 4 -5 2.69 0.16
 -6 -4 5 2.88 0.18
 -6 -4 5 2.91 0.18
 -6 -4 5 2.86 0.16
 7 3 -6 2.3 0.15
 -7 -3 6 2.25 0.18
 -7 -3 6 1.95 0.16
 8 2 -7 0.2 0.08
 -8 -2 7 0.38 0.12
 -8 -2 7 0.32 0.11
 -2 11 3 0.22 0.1
 2 -11 -3 0.29 0.07
 -1 10 2 1.48 0.14
 1 -10 -2 1.38 0.09
 0 9 1 1.8 0.14
 0 9 1 1.57 0.14
 0 -9 -1 1.57 0.07
 0 -9 -1 1.63 0.08
 1 8 0 0.03 0.05
 1 8 0 0.02 0.02
 1 8 0 0.02 0.05
 -1 -8 0 0.03 0.03
 -1 -8 0 -0.01 0.02
 -1 -8 0 0.02 0.04
 2 7 -1 1.83 0.09
 2 7 -1 2.06 0.13
 2 7 -1 1.63 0.11
 -2 -7 1 1.68 0.1
 -2 -7 1 1.82 0.1
 -2 -7 1 1.89 0.08
 -2 -7 1 1.73 0.09
 3 6 -2 1.5 0.11
 3 6 -2 1.54 0.1
 3 6 -2 1.48 0.09
 -3 -6 2 1.59 0.09
 4 5 -3 3.35 0.15
 4 5 -3 3.49 0.16
 -4 -5 3 3.66 0.15
 -4 -5 3 3.48 0.16
 -4 -5 3 3.58 0.16
 5 4 -4 0.25 0.07
 5 4 -4 0.17 0.06
 5 4 -4 0.13 0.04
 -5 -4 4 0.17 0.06
 -5 -4 4 0.28 0.07
 -5 -4 4 0.14 0.06
 6 3 -5 4.52 0.2
 -6 -3 5 4.39 0.22
 -6 -3 5 4.82 0.22
 -6 -3 5 4.63 0.22
 7 2 -6 1.55 0.16
 -7 -2 6 1.48 0.19
 8 1 -7 3.62 0.19
 -8 -1 7 3.73 0.24
 -3 11 4 0.02 0.08
 3 -11 -4 0 0.05
 -2 10 3 2.83 0.2
 2 -10 -3 2.87 0.13
 -1 9 2 0 0.05
 1 -9 -2 0.05 0.04
 0 8 1 2.45 0.14
 0 8 1 2.22 0.15
 0 -8 -1 2.18 0.08
 0 -8 -1 2.27 0.09
 1 7 0 9.01 0.32
 1 7 0 8.85 0.24
 1 7 0 9.02 0.3
 -1 -7 0 9.06 0.26
 -1 -7 0 9.01 0.24
 -1 -7 0 8.39 0.27
 -1 -7 0 8.67 0.22
 2 6 -1 1.26 0.07
 2 6 -1 1.39 0.09
 2 6 -1 1.38 0.1
 -2 -6 1 1.36 0.08
 -2 -6 1 1.37 0.09
 -2 -6 1 1.27 0.07
 3 5 -2 1.78 0.11
 3 5 -2 1.79 0.09
 -3 -5 2 1.9 0.09
 4 4 -3 9.92 0.32
 4 4 -3 9.84 0.28
 4 4 -3 8.91 0.29
 -4 -4 3 9.38 0.31
 -4 -4 3 9.86 0.3
 -4 -4 3 9.34 0.28
 5 3 -4 0.02 0.02
 5 3 -4 -0.02 0.03
 5 3 -4 -0.02 0.03
 -5 -3 4 -0.02 0.03
 -5 -3 4 0.01 0.04
 -5 -3 4 -0.01 0.04
 6 2 -5 0.03 0.05
 -6 -2 5 0.05 0.06
 -6 -2 5 0.02 0.06
 7 1 -6 0.7 0.11
 -7 -1 6 0.7 0.13
 8 0 -7 1.36 0.11
 -8 0 7 1.68 0.22
 -3 10 4 22.1 0.71
 3 -10 -4 22.31 0.56
 -2 9 3 44.65 1.17
 2 -9 -3 44.93 1.02
 -1 8 2 0.18 0.07
 -1 8 2 0.1 0.06
 1 -8 -2 0.14 0.04
 0 7 1 6.66 0.26
 0 7 1 6.49 0.24
 0 -7 -1 6.7 0.22
 0 -7 -1 6.91 0.17
 0 -7 -1 7.21 0.21
 0 -7 -1 6.45 0.19
 1 6 0 17.92 0.48
 1 6 0 18.3 0.51
 1 6 0 18.02 0.43
 -1 -6 0 17.96 0.43
 -1 -6 0 17.84 0.46
 -1 -6 0 18.56 0.46
 -1 -6 0 17.76 0.39
 2 5 -1 4.51 0.15
 2 5 -1 4.27 0.17
 2 5 -1 4.28 0.19
 -2 -5 1 4.57 0.14
 -2 -5 1 4.85 0.16
 -2 -5 1 4.64 0.16
 3 4 -2 7.17 0.22
 3 4 -2 7.67 0.25
 3 4 -2 7.01 0.23
 -3 -4 2 7.12 0.21
 4 3 -3 26.89 0.68
 4 3 -3 26.48 0.64
 4 3 -3 26.71 0.64
 -4 -3 3 26.08 0.69
 -4 -3 3 25.98 0.67
 -4 -3 3 27.27 0.65
 5 2 -4 6.14 0.22
 5 2 -4 6.62 0.2
 5 2 -4 6.77 0.24
 -5 -2 4 6.34 0.24
 -5 -2 4 5.89 0.24
 6 1 -5 62.57 1.39
 -6 -1 5 60.69 1.48
 7 0 -6 6.67 0.24
 -7 0 6 7.24 0.32
 8 -1 -7 5.37 0.22
 -8 1 7 5.74 0.31
 -4 10 5 11.32 0.46
 -4 10 5 10.92 0.44
 4 -10 -5 11.14 0.33
 -3 9 4 0.16 0.09
 3 -9 -4 0.04 0.05
 -2 8 3 69.84 1.69
 2 -8 -3 69 1.52
 -1 7 2 1.48 0.11
 -1 7 2 1.57 0.11
 1 -7 -2 1.61 0.09
 1 -7 -2 1.54 0.08
 1 -7 -2 1.58 0.09
 0 6 1 140.1 3.24
 0 6 1 145.84 3.07
 0 -6 -1 141.32 3.07
 0 -6 -1 142.02 3.03
 0 -6 -1 143.14 2.83
 0 -6 -1 145.15 3.18
 1 5 0 59.66 1.32
 1 5 0 60.48 1.3
 -1 -5 0 58.79 1.28
 -1 -5 0 58.99 1.19
 -1 -5 0 58.76 1.32
 -1 -5 0 61.6 1.36
 2 4 -1 0.01 0.02
 2 4 -1 -0.02 0.02
 2 4 -1 0 0.01
 -2 -4 1 0.01 0.02
 -2 -4 1 0.05 0.03
 -2 -4 1 0.21 0.04
 3 3 -2 14.47 0.38
 3 3 -2 15.8 0.41
 3 3 -2 15.7 0.38
 -3 -3 2 14.96 0.38
 -3 -3 2 14.69 0.39
 4 2 -3 6.74 0.21
 4 2 -3 6.76 0.2
 4 2 -3 7.37 0.23
 -4 -2 3 6.66 0.24
 -4 -2 3 6.88 0.23
 5 1 -4 2.15 0.11
 5 1 -4 2.14 0.12
 5 1 -4 2.24 0.09
 -5 -1 4 2.16 0.13
 -5 -1 4 2.09 0.14
 6 0 -5 50.11 1.13
 -6 0 5 49.15 1.23
 7 -1 -6 9.64 0.3
 -7 1 6 10.07 0.4
 8 -2 -7 6.4 0.24
 -8 2 7 7.09 0.35
 -4 9 5 0.67 0.15
 -4 9 5 0.56 0.13
 4 -9 -5 0.68 0.09
 -3 8 4 1.63 0.14
 -3 8 4 1.63 0.14
 3 -8 -4 1.28 0.09
 -2 7 3 6.02 0.25
 -2 7 3 6.35 0.24
 2 -7 -3 6.2 0.19
 -1 6 2 14.94 0.44
 -1 6 2 14.91 0.41
 1 -6 -2 14.93 0.39
 1 -6 -2 15.05 0.39
 1 -6 -2 14.58 0.36
 0 5 1 72.53 1.59
 0 -5 -1 71.77 1.44
 0 -5 -1 72.07 1.58
 0 -5 -1 74.65 1.63
 0 -5 -1 70.94 1.53
 1 4 0 8.08 0.25
 1 4 0 8.79 0.24
 1 4 0 8.48 0.21
 -1 -4 0 8.89 0.23
 -1 -4 0 8.38 0.21
 -1 -4 0 8.57 0.23
 -1 -4 0 8.36 0.19
 2 3 -1 78.72 1.76
 2 3 -1 78.09 1.66
 2 3 -1 75.13 1.7
 -2 -3 1 76.84 1.75
 -2 -3 1 78.45 1.69
 -2 -3 1 75.66 1.64
 3 2 -2 17.47 0.43
 3 2 -2 18 0.46
 3 2 -2 18.18 0.44
 -3 -2 2 18.02 0.46
 -3 -2 2 18.65 0.45
 4 1 -3 1.7 0.08
 4 1 -3 1.57 0.09
 4 1 -3 1.75 0.07
 4 1 -3 1.75 0.1
 -4 -1 3 1.89 0.1
 -4 -1 3 1.76 0.11
 5 0 -4 5.23 0.2
 5 0 -4 5.13 0.14
 5 0 -4 5.03 0.17
 -5 0 4 4.87 0.22
 -5 0 4 5.13 0.21
 6 -1 -5 2.44 0.12
 -6 1 5 2.47 0.17
 7 -2 -6 0.04 0.04
 -7 2 6 -0.01 0.06
 8 -3 -7 0.14 0.06
 -8 3 7 0.26 0.12
 -5 9 6 2.91 0.23
 -5 9 6 2.96 0.23
 5 -9 -6 2.77 0.14
 -4 8 5 1.5 0.2
 -4 8 5 1.22 0.18
 4 -8 -5 1.07 0.09
 -3 7 4 11.51 0.4
 -3 7 4 11.98 0.39
 3 -7 -4 11.42 0.32
 -2 6 3 1.03 0.08
 -2 6 3 1.02 0.09
 2 -6 -3 0.95 0.08
 2 -6 -3 0.89 0.06
 2 -6 -3 0.89 0.07
 -1 5 2 93.31 2.15
 -1 5 2 97.06 2.03
 1 -5 -2 93.14 2.1
 1 -5 -2 91.84 2.03
 1 -5 -2 93.58 2.02
 0 4 1 1.08 0.06
 0 4 1 1.05 0.07
 0 -4 -1 1.07 0.06
 0 -4 -1 1.14 0.04
 0 -4 -1 0.96 0.05
 0 -4 -1 1.1 0.05
 1 3 0 660.05 15.31
 1 3 0 660.42 16.43
 1 3 0 653.51 14.84
 -1 -3 0 639.55 15.32
 -1 -3 0 644.07 15.49
 -1 -3 0 687.24 14.74
 2 2 -1 515.83 12.45
 2 2 -1 526.89 12.42
 -2 -2 1 504.09 12.52
 -2 -2 1 515.75 12.94
 -2 -2 1 539.01 12.51
 -2 -2 1 557.74 12.33
 3 1 -2 4.02 0.12
 3 1 -2 4.2 0.13
 3 1 -2 4.41 0.14
 -3 -1 2 4.16 0.15
 -3 -1 2 4.33 0.14
 -3 -1 2 4.24 0.15
 4 0 -3 16.38 0.4
 4 0 -3 16.84 0.43
 4 0 -3 16.49 0.38
 -4 0 3 15.88 0.43
 -4 0 3 15.91 0.45
 5 -1 -4 0.63 0.09
 -5 1 4 0.93 0.12
 -5 1 4 0.79 0.11
 6 -2 -5 1.09 0.08
 -6 2 5 1.4 0.17
 7 -3 -6 0.65 0.09
 -7 3 6 0.67 0.14
 8 -4 -7 0.08 0.05
 -8 4 7 0.16 0.11
 -5 8 6 0.15 0.1
 -5 8 6 0.08 0.09
 5 -8 -6 0.13 0.06
 -4 7 5 8.82 0.36
 -4 7 5 9.76 0.38
 4 -7 -5 9.16 0.28
 -3 6 4 1.59 0.12
 -3 6 4 1.62 0.12
 -3 6 4 1.32 0.11
 3 -6 -4 1.46 0.09
 -2 5 3 2.74 0.14
 -2 5 3 2.74 0.13
 2 -5 -3 3.1 0.13
 2 -5 -3 2.83 0.12
 2 -5 -3 2.92 0.11
 -1 4 2 3.44 0.13
 -1 4 2 3.91 0.13
 1 -4 -2 3.3 0.11
 1 -4 -2 3.32 0.11
 1 -4 -2 3.55 0.12
 0 3 1 16.78 0.42
 0 3 1 16.19 0.39
 0 3 1 16.54 0.34
 0 -3 -1 16.58 0.39
 0 -3 -1 16.87 0.37
 0 -3 -1 16.65 0.39
 0 -3 -1 16.83 0.34
 1 2 0 49.94 1.12
 1 2 0 49.95 1.06
 -1 -2 0 48 1.16
 -1 -2 0 49.61 1.07
 -1 -2 0 48.35 1.11
 2 1 -1 60.43 1.32
 2 1 -1 61.45 1.32
 -2 -1 1 60.36 1.31
 -2 -1 1 57.92 1.3
 -2 -1 1 60.59 1.3
 3 0 -2 92.3 1.94
 3 0 -2 87.45 1.94
 3 0 -2 89.19 1.95
 -3 0 2 89.22 1.95
 -3 0 2 91.18 1.94
 4 -1 -3 18.06 0.47
 -4 1 3 17.61 0.49
 -4 1 3 18.33 0.45
 -4 1 3 17.69 0.47
 -5 2 4 7.79 0.3
 6 -3 -5 0.15 0.05
 -6 3 5 0.2 0.09
 7 -4 -6 2.21 0.11
 -7 4 6 2.27 0.19
 -6 8 7 0.24 0.12
 6 -8 -7 0.38 0.08
 -5 7 6 2.32 0.19
 -5 7 6 2.17 0.18
 5 -7 -6 2.14 0.12
 -4 6 5 -0.07 0.04
 -4 6 5 -0.02 0.06
 4 -6 -5 0.03 0.04
 -3 5 4 0.08 0.05
 -3 5 4 0.07 0.04
 -3 5 4 0.69 0.1
 -2 4 3 29.33 0.76
 -2 4 3 30.24 0.73
 -2 4 3 30.85 0.72
 2 -4 -3 31.09 0.73
 2 -4 -3 29.69 0.68
 2 -4 -3 30.92 0.72
 -1 3 2 36.36 0.87
 -1 3 2 36.99 0.82
 -1 3 2 38.79 0.83
 1 -3 -2 35.58 0.82
 1 -3 -2 36.53 0.79
 1 -3 -2 36.63 0.84
 0 2 1 42.6 1.08
 0 2 1 40.66 0.95
 0 -2 -1 42.49 0.92
 0 -2 -1 41.17 0.83
 0 -2 -1 40.42 0.89
 0 -2 -1 43.41 0.95
 1 1 0 24.64 0.56
 1 1 0 24.01 0.55
 -1 -1 0 25.35 0.58
 -1 -1 0 24.65 0.56
 -1 -1 0 25.33 0.57
 2 0 -1 11.03 0.24
 2 0 -1 9.97 0.26
 -2 0 1 11.08 0.28
 -2 0 1 10.32 0.27
 -2 0 1 10.75 0.25
 3 -1 -2 41.28 0.93
 -3 1 2 42.01 0.91
 -3 1 2 39.93 0.93
 4 -2 -3 12.61 0.35
 4 -2 -3 11.73 0.3
 -4 2 3 12.57 0.33
 -4 2 3 12.4 0.35
 -4 2 3 11.35 0.36
 -4 2 3 12.13 0.35
 5 -3 -4 3.36 0.13
 -5 3 4 3.62 0.19
 6 -4 -5 16.08 0.41
 -6 4 5 15.91 0.53
 7 -5 -6 1.27 0.08
 -7 5 6 2.04 0.24
 -6 7 7 0.6 0.15
 6 -7 -7 0.51 0.09
 -5 6 6 3.6 0.23
 5 -6 -6 3.52 0.15
 -4 5 5 1.92 0.14
 -4 5 5 1.99 0.14
 4 -5 -5 2.1 0.1
 -3 4 4 0.01 0.03
 -3 4 4 0.1 0.04
 -3 4 4 0.12 0.05
 3 -4 -4 0.04 0.03
 3 -4 -4 0.16 0.04
 3 -4 -4 0.07 0.04
 -2 3 3 1.47 0.08
 2 -3 -3 1.46 0.07
 2 -3 -3 1.37 0.08
 2 -3 -3 1.34 0.07
 -1 2 2 4.49 0.13
 -1 2 2 4.4 0.14
 -1 2 2 4.57 0.14
 -1 2 2 4.58 0.14
 1 -2 -2 4.68 0.12
 1 -2 -2 4.31 0.13
 1 -2 -2 4.54 0.13
 1 -2 -2 4.52 0.13
 0 1 1 56.06 1.27
 0 1 1 51.35 1.21
 0 1 1 57.81 1.29
 0 -1 -1 55.71 1.21
 0 -1 -1 56.24 1.21
 0 -1 -1 53.64 1.24
 0 -1 -1 58.52 1.22
 -1 0 0 0.4 0.02
 2 -1 -1 83.16 1.85
 -2 1 1 86.26 1.87
 -2 1 1 85.14 1.84
 -2 1 1 85.58 1.86
 3 -2 -2 55.43 1.19
 3 -2 -2 55.83 1.24
 -3 2 2 54.53 1.29
 -3 2 2 55.89 1.22
 -3 2 2 55.72 1.23
 -3 2 2 55.55 1.25
 4 -3 -3 3.19 0.12
 4 -3 -3 3.03 0.11
 -4 3 3 3.03 0.15
 -4 3 3 2.93 0.13
 -4 3 3 2.85 0.15
 -4 3 3 3.17 0.14
 -4 3 3 3.09 0.12
 5 -4 -4 1.15 0.07
 -5 4 4 1.36 0.12
 6 -5 -5 15.4 0.39
 -6 5 5 15.42 0.53
 7 -6 -6 1.22 0.08
 -7 6 6 1.61 0.23
 -6 6 7 2.17 0.2
 6 -6 -7 2.53 0.13
 -5 5 6 0.25 0.09
 5 -5 -6 0.54 0.08
 -4 4 5 0.05 0.05
 -4 4 5 0.01 0.04
 4 -4 -5 0.02 0.03
 -3 3 4 41.54 1
 -3 3 4 42.5 0.98
 3 -3 -4 41.54 1
 3 -3 -4 41.9 0.93
 3 -3 -4 41.8 0.98
 -2 2 3 18.93 0.49
 -2 2 3 20.22 0.48
 -2 2 3 20.05 0.47
 2 -2 -3 19.25 0.48
 2 -2 -3 19.75 0.45
 2 -2 -3 19.41 0.46
 -1 1 2 130.21 2.69
 -1 1 2 120.41 2.66
 -1 1 2 124.57 2.65
 1 -1 -2 120.07 2.62
 1 -1 -2 121.96 2.69
 1 -1 -2 121 2.69
 1 -1 -2 123.44 2.78
 0 0 1 88.25 2.2
 0 0 -1 86.77 2.21
 0 0 -1 79.11 1.9
 1 -1 0 402.1 8.93
 1 -1 0 401.39 8.52
 -1 1 0 407.51 8.99
 -1 1 0 386.55 9.4
 2 -2 -1 85.39 1.87
 -2 2 1 86.21 1.88
 3 -3 -2 201.58 4.32
 3 -3 -2 199.37 4.28
 -3 3 2 195.71 4.58
 -3 3 2 201.37 4.36
 -3 3 2 201.48 4.36
 -3 3 2 211.83 4.39
 4 -4 -3 8.82 0.23
 -4 4 3 8.71 0.3
 -4 4 3 8.55 0.3
 5 -5 -4 0.28 0.05
 -5 5 4 0.32 0.09
 -5 5 4 0.13 0.07
 6 -6 -5 0.93 0.07
 -6 6 5 1.44 0.2
 7 -7 -6 0.73 0.05
 -7 7 6 0.95 0.19
 -7 6 8 1.73 0.25
 7 -6 -8 1.34 0.11
 -6 5 7 2.36 0.26
 6 -5 -7 1.68 0.11
 -5 4 6 8.61 0.35
 5 -4 -6 8.98 0.27
 -4 3 5 0.6 0.11
 -4 3 5 0.87 0.12
 4 -3 -5 0.69 0.08
 4 -3 -5 0.71 0.07
 4 -3 -5 0.78 0.1
 -3 2 4 12.81 0.38
 -3 2 4 12.93 0.36
 3 -2 -4 12.97 0.36
 3 -2 -4 12.92 0.33
 3 -2 -4 12.48 0.35
 3 -2 -4 12.87 0.33
 -2 1 3 1.97 0.1
 -2 1 3 1.93 0.08
 -2 1 3 1.88 0.09
 2 -1 -3 1.93 0.08
 2 -1 -3 1.91 0.08
 2 -1 -3 1.79 0.09
 2 -1 -3 1.96 0.08
 -1 0 2 83.74 1.85
 -1 0 2 87 1.84
 -1 0 2 83.77 1.82
 1 0 -2 83.34 2.32
 1 0 -2 83.4 1.79
 1 0 -2 82.4 1.85
 0 -1 1 1.24 0.03
 1 -2 0 0.84 0.04
 1 -2 0 0.84 0.03
 -1 2 0 0.78 0.04
 2 -3 -1 16.96 0.41
 -2 3 1 16.77 0.4
 3 -4 -2 0.38 0.05
 3 -4 -2 0.44 0.05
 3 -4 -2 0.31 0.05
 -3 4 2 0.39 0.06
 -3 4 2 0.23 0.05
 -3 4 2 0.37 0.05
 4 -5 -3 1.38 0.07
 -4 5 3 1.4 0.11
 -4 5 3 1.52 0.11
 5 -6 -4 1.25 0.07
 -5 6 4 1.27 0.16
 -5 6 4 1.24 0.17
 6 -7 -5 1.48 0.08
 -6 7 5 2.02 0.23
 -6 7 5 2.14 0.24
 -7 5 8 2.53 0.22
 7 -5 -8 2.24 0.14
 -6 4 7 0.13 0.09
 6 -4 -7 0.07 0.05
 -5 3 6 0.11 0.07
 5 -3 -6 0.09 0.04
 -4 2 5 0.11 0.06
 -4 2 5 0.1 0.05
 4 -2 -5 0.26 0.06
 4 -2 -5 0.16 0.03
 4 -2 -5 0.18 0.05
 4 -2 -5 0.18 0.06
 -3 1 4 0.1 0.04
 -3 1 4 0.04 0.03
 3 -1 -4 0.14 0.04
 3 -1 -4 0.08 0.03
 3 -1 -4 0.14 0.04
 3 -1 -4 0.08 0.03
 -2 0 3 2.14 0.09
 -2 0 3 1.78 0.09
 2 0 -3 1.79 0.09
 2 0 -3 1.89 0.08
 2 0 -3 1.86 0.08
 2 0 -3 2.21 0.08
 -1 -1 2 2.55 0.08
 -1 -1 2 2.54 0.09
 -1 -1 2 2.64 0.09
 1 1 -2 2.61 0.08
 1 1 -2 2.53 0.08
 1 1 -2 2.44 0.09
 1 1 -2 2.59 0.09
 0 -2 1 0.09 0.03
 0 -2 1 -0.02 0.02
 1 -3 0 5.77 0.15
 -1 3 0 5.69 0.16
 2 -4 -1 27.82 0.62
 2 -4 -1 28.2 0.65
 -2 4 1 28.16 0.7
 -2 4 1 28.3 0.65
 3 -5 -2 0.82 0.08
 3 -5 -2 0.82 0.06
 3 -5 -2 0.8 0.05
 -3 5 2 0.82 0.07
 -3 5 2 0.9 0.08
 4 -6 -3 20.91 0.5
 -4 6 3 22.07 0.6
 -4 6 3 21.31 0.62
 5 -7 -4 0.84 0.08
 -5 7 4 0.94 0.15
 -5 7 4 0.85 0.14
 6 -8 -5 8.76 0.23
 -6 8 5 9.07 0.41
 -6 8 5 8.77 0.39
 -7 4 8 1.46 0.22
 7 -4 -8 1.4 0.11
 -6 3 7 0.1 0.09
 6 -3 -7 0.21 0.06
 -5 2 6 0.44 0.1
 -5 2 6 0.34 0.09
 5 -2 -6 0.44 0.07
 -4 1 5 1.02 0.12
 -4 1 5 1.3 0.14
 4 -1 -5 0.92 0.08
 4 -1 -5 0.88 0.06
 4 -1 -5 0.96 0.07
 4 -1 -5 0.88 0.08
 -3 0 4 0.11 0.04
 3 0 -4 0.08 0.03
 3 0 -4 0.1 0.04
 3 0 -4 0.11 0.03
 3 0 -4 0.14 0.04
 -2 -1 3 4.93 0.17
 -2 -1 3 5.02 0.16
 2 1 -3 4.7 0.16
 2 1 -3 4.89 0.15
 2 1 -3 4.7 0.15
 2 1 -3 5.04 0.16
 -1 -2 2 8.53 0.22
 -1 -2 2 8.67 0.21
 -1 -2 2 8.51 0.23
 1 2 -2 8.45 0.22
 1 2 -2 8.53 0.23
 1 2 -2 8.32 0.21
 0 -3 1 24.75 0.55
 0 -3 1 25.37 0.57
 0 3 -1 25.75 0.57
 0 3 -1 24.97 0.61
 1 -4 0 30.61 0.68
 -1 4 0 30.61 0.69
 -1 4 0 29.29 0.73
 2 -5 -1 14.88 0.38
 2 -5 -1 14.78 0.35
 -2 5 1 15.15 0.39
 -2 5 1 15.27 0.43
 3 -6 -2 9.16 0.24
 -3 6 2 9.13 0.32
 4 -7 -3 2.42 0.1
 -4 7 3 2.65 0.17
 -4 7 3 2.94 0.18
 5 -8 -4 6.99 0.2
 -5 8 4 7.17 0.33
 -5 8 4 6.92 0.32
 -7 3 8 0.33 0.13
 7 -3 -8 0.42 0.09
 -6 2 7 2 0.17
 6 -2 -7 1.82 0.12
 -5 1 6 5.85 0.27
 -5 1 6 6.63 0.27
 5 -1 -6 6.07 0.22
 -4 0 5 5.63 0.22
 -4 0 5 5.32 0.23
 4 0 -5 5.89 0.19
 4 0 -5 5.76 0.19
 4 0 -5 5.94 0.21
 4 0 -5 5.43 0.21
 -3 -1 4 16.25 0.45
 -3 -1 4 16.7 0.44
 3 1 -4 17.05 0.45
 3 1 -4 16.62 0.44
 3 1 -4 17.16 0.42
 3 1 -4 16.87 0.43
 -2 -2 3 21.11 0.5
 -2 -2 3 21.19 0.52
 -2 -2 3 21.63 0.54
 2 2 -3 21.13 0.51
 2 2 -3 21.24 0.5
 2 2 -3 21.06 0.53
 -1 -3 2 22.88 0.52
 -1 -3 2 24.12 0.55
 1 3 -2 23.24 0.53
 1 3 -2 23.67 0.58
 1 3 -2 23.82 0.55
 0 -4 1 12.62 0.31
 0 -4 1 11.96 0.28
 0 4 -1 12.38 0.32
 0 4 -1 11.9 0.34
 1 -5 0 35.62 0.8
 -1 5 0 36.12 0.83
 -1 5 0 34.85 0.87
 -1 5 0 34.4 0.82
 2 -6 -1 0.06 0.03
 2 -6 -1 0.12 0.03
 2 -6 -1 0.04 0.03
 -2 6 1 0.03 0.04
 -2 6 1 0.05 0.04
 3 -7 -2 1.48 0.08
 -3 7 2 1.41 0.12
 4 -8 -3 0.04 0.04
 -4 8 3 0.17 0.08
 -4 8 3 0.01 0.06
 5 -9 -4 0.04 0.04
 -5 9 4 0.02 0.08
 -5 9 4 0.07 0.08
 -7 2 8 0.03 0.08
 7 -2 -8 0.05 0.06
 -6 1 7 15.29 0.52
 6 -1 -7 14.71 0.43
 -5 0 6 3.31 0.19
 -5 0 6 3 0.17
 5 0 -6 2.94 0.17
 5 0 -6 2.96 0.13
 5 0 -6 2.79 0.14
 -4 -1 5 11.21 0.35
 -4 -1 5 11.5 0.37
 4 1 -5 11.57 0.35
 4 1 -5 11.36 0.34
 4 1 -5 11.22 0.32
 4 1 -5 11.11 0.32
 -3 -2 4 1.23 0.09
 -3 -2 4 1.21 0.08
 -3 -2 4 1.03 0.08
 3 2 -4 0.95 0.07
 3 2 -4 1.07 0.07
 3 2 -4 1.11 0.08
 -2 -3 3 1.39 0.08
 -2 -3 3 1.47 0.08
 -2 -3 3 1.35 0.07
 2 3 -3 1.32 0.08
 2 3 -3 1.27 0.07
 2 3 -3 1.38 0.08
 -1 -4 2 2.32 0.1
 -1 -4 2 2.06 0.08
 -1 -4 2 2.32 0.09
 1 4 -2 2.05 0.11
 1 4 -2 2.08 0.1
 1 4 -2 2.02 0.08
 0 -5 1 1.26 0.07
 0 -5 1 1.22 0.06
 0 5 -1 1.26 0.09
 0 5 -1 1.27 0.08
 1 -6 0 0.59 0.07
 -1 6 0 0.52 0.08
 -1 6 0 0.72 0.09
 2 -7 -1 0.12 0.04
 -2 7 1 0.1 0.05
 3 -8 -2 1.8 0.09
 -3 8 2 1.58 0.14
 4 -9 -3 2.25 0.1
 -4 9 3 2.29 0.17
 -4 9 3 2.34 0.18
 -5 10 4 0.44 0.13
 -5 10 4 0.15 0.11
 -8 2 9 2.5 0.3
 8 -2 -9 1.89 0.15
 -7 1 8 0.59 0.15
 7 -1 -8 0.47 0.1
 -6 0 7 15.69 0.53
 -6 0 7 15.78 0.51
 6 0 -7 15.97 0.45
 -5 -1 6 51.98 1.26
 -5 -1 6 52.24 1.29
 5 1 -6 54.75 1.22
 5 1 -6 54.11 1.22
 5 1 -6 52.58 1.26
 -4 -2 5 1.29 0.1
 -4 -2 5 1.19 0.09
 -4 -2 5 1.21 0.1
 4 2 -5 1.25 0.09
 4 2 -5 1.2 0.08
 4 2 -5 1.11 0.08
 -3 -3 4 38.39 0.95
 -3 -3 4 39.15 0.92
 -3 -3 4 38.88 0.89
 3 3 -4 38.56 0.9
 3 3 -4 38.75 0.91
 -2 -4 3 5.49 0.18
 -2 -4 3 5.48 0.17
 -2 -4 3 5.39 0.18
 2 4 -3 5.35 0.2
 2 4 -3 5.02 0.18
 2 4 -3 5.48 0.18
 -1 -5 2 19.81 0.49
 -1 -5 2 19.95 0.41
 -1 -5 2 19.04 0.48
 -1 -5 2 18.75 0.45
 1 5 -2 19.61 0.5
 1 5 -2 19.36 0.53
 0 -6 1 33.01 0.68
 0 -6 1 34.06 0.74
 0 -6 1 33.81 0.79
 0 6 -1 34.51 0.81
 0 6 -1 33.23 0.86
 -1 7 0 2.92 0.16
 2 -8 -1 10 0.27
 -2 8 1 10.21 0.37
 3 -9 -2 0.31 0.06
 -3 9 2 0.38 0.11
 4 -10 -3 0.59 0.06
 -4 10 3 0.66 0.15
 -4 10 3 0.79 0.16
 -8 1 9 4.76 0.31
 8 -1 -9 4.77 0.23
 -7 0 8 12.34 0.48
 7 0 -8 12.47 0.4
 -6 -1 7 4.34 0.24
 -6 -1 7 4.49 0.23
 6 1 -7 4.29 0.2
 -5 -2 6 12.58 0.4
 -5 -2 6 12.15 0.41
 -5 -2 6 12.66 0.42
 5 2 -6 12.4 0.37
 5 2 -6 12.9 0.37
 -4 -3 5 6.56 0.25
 -4 -3 5 6.29 0.25
 -4 -3 5 7.38 0.24
 4 3 -5 6.44 0.23
 4 3 -5 6.7 0.23
 -3 -4 4 64.11 1.51
 -3 -4 4 65.02 1.47
 -3 -4 4 64.09 1.42
 3 4 -4 64.8 1.46
 3 4 -4 65.91 1.45
 3 4 -4 64.88 1.54
 -2 -5 3 0.62 0.08
 2 5 -3 0.24 0.06
 2 5 -3 0.09 0.03
 2 5 -3 0.1 0.04
 -1 -6 2 8.83 0.27
 -1 -6 2 9.62 0.27
 -1 -6 2 9.38 0.22
 -1 -6 2 9.06 0.24
 1 6 -2 8.95 0.25
 1 6 -2 9.11 0.31
 1 6 -2 9.12 0.29
 0 7 -1 63.95 1.45
 0 7 -1 63.14 1.54
 1 -8 0 0.9 0.06
 -1 8 0 1.22 0.15
 2 -9 -1 19.32 0.47
 -2 9 1 18.89 0.6
 3 -10 -2 8.48 0.25
 -3 10 2 8.7 0.37
 8 0 -9 2.74 0.18
 -7 -1 8 25.56 0.77
 7 1 -8 25.06 0.68
 -6 -2 7 2.33 0.18
 -6 -2 7 2.52 0.17
 -6 -2 7 2.48 0.18
 6 2 -7 2.35 0.15
 -5 -3 6 3.5 0.18
 -5 -3 6 3.4 0.19
 -5 -3 6 3.26 0.18
 5 3 -6 3.32 0.17
 5 3 -6 3.33 0.16
 -4 -4 5 2.49 0.13
 -4 -4 5 2.54 0.14
 -4 -4 5 2.55 0.14
 4 4 -5 2.73 0.14
 4 4 -5 2.44 0.15
 4 4 -5 2.49 0.13
 -3 -5 4 6.69 0.24
 -3 -5 4 7.09 0.22
 -3 -5 4 7.55 0.24
 3 5 -4 6.9 0.27
 3 5 -4 7.08 0.24
 3 5 -4 6.97 0.25
 -2 -6 3 1.64 0.09
 -2 -6 3 1.74 0.1
 -2 -6 3 1.68 0.1
 2 6 -3 1.62 0.09
 2 6 -3 1.77 0.11
 2 6 -3 1.86 0.13
 -1 -7 2 1.6 0.08
 -1 -7 2 1.68 0.08
 1 7 -2 1.59 0.12
 1 7 -2 1.5 0.08
 1 7 -2 1.6 0.11
 0 -8 1 12.76 0.29
 0 -8 1 12.79 0.32
 0 8 -1 12.81 0.43
 1 -9 0 0.92 0.08
 -1 9 0 0.27 0.09
 2 -10 -1 18.86 0.46
 -2 10 1 17.84 0.6
 3 -11 -2 1.32 0.08
 -3 11 2 1.79 0.23
 8 1 -9 1.67 0.2
 -7 -2 8 17.1 0.63
 7 2 -8 18.19 0.54
 -6 -3 7 1.44 0.19
 -6 -3 7 1.68 0.19
 -6 -3 7 1.56 0.19
 6 3 -7 1.37 0.16
 -5 -4 6 20.22 0.55
 -5 -4 6 20.77 0.59
 -5 -4 6 19.76 0.58
 5 4 -6 19.54 0.55
 5 4 -6 20.06 0.56
 -4 -5 5 7.33 0.24
 -4 -5 5 7.42 0.27
 -4 -5 5 7.38 0.27
 4 5 -5 7.22 0.27
 4 5 -5 7.13 0.26
 4 5 -5 7.31 0.29
 -3 -6 4 -0.04 0.03
 -3 -6 4 -0.01 0.04
 -3 -6 4 0.01 0.03
 3 6 -4 -0.04 0.04
 3 6 -4 0.03 0.03
 3 6 -4 0.03 0.05
 -2 -7 3 0.29 0.04
 -2 -7 3 0.36 0.06
 2 7 -3 0.38 0.08
 2 7 -3 0.24 0.05
 2 7 -3 0.32 0.08
 -1 -8 2 1.3 0.06
 -1 -8 2 1.23 0.07
 1 8 -2 1.39 0.08
 1 8 -2 1.33 0.12
 0 -9 1 0.02 0.03
 0 9 -1 0 0.05
 1 -10 0 7.25 0.22
 -1 10 0 7.76 0.34
 2 -11 -1 8.84 0.26
 -2 11 1 9.33 0.4
 8 2 -9 0.28 0.11
 -7 -3 8 1.27 0.19
 7 3 -8 1.31 0.18
 -6 -4 7 0.1 0.08
 6 4 -7 0.04 0.07
 -5 -5 6 12.82 0.39
 5 5 -6 13.25 0.43
 5 5 -6 13.85 0.42
 -4 -6 5 2.33 0.12
 4 6 -5 2.28 0.14
 4 6 -5 2.27 0.15
 4 6 -5 2.53 0.17
 -3 -7 4 3.14 0.14
 3 7 -4 3.03 0.17
 3 7 -4 3.26 0.19
 3 7 -4 3.03 0.15
 -2 -8 3 0.26 0.05
 -2 -8 3 0.2 0.06
 2 8 -3 0.24 0.06
 2 8 -3 0.23 0.09
 2 8 -3 0.22 0.08
 -1 -9 2 0.05 0.04
 -1 -9 2 -0.02 0.02
 1 9 -2 0.01 0.03
 1 9 -2 0.04 0.06
 0 -10 1 0.07 0.04
 0 10 -1 0.15 0.09
 0 10 -1 0.1 0.05
 1 -11 0 1.11 0.11
 -1 11 0 1.13 0.18
 -7 -4 8 2.34 0.18
 7 4 -8 2.5 0.18
 -6 -5 7 4.41 0.21
 6 5 -7 3.9 0.22
 -5 -6 6 1.8 0.12
 5 6 -6 1.52 0.14
 5 6 -6 1.73 0.13
 -4 -7 5 7.84 0.26
 4 7 -5 8 0.31
 4 7 -5 8.15 0.34
 4 7 -5 8.35 0.3
 -3 -8 4 0.87 0.08
 -3 -8 4 0.96 0.07
 3 8 -4 0.88 0.14
 3 8 -4 1.18 0.1
 3 8 -4 1.27 0.17
 -2 -9 3 6.04 0.2
 -2 -9 3 6.01 0.17
 2 9 -3 5.73 0.29
 2 9 -3 6.08 0.23
 -1 -10 2 2.74 0.12
 -1 -10 2 2.61 0.1
 1 10 -2 2.92 0.14
 1 10 -2 2.83 0.2
 0 -11 1 12.69 0.34
 0 11 -1 13.45 0.51
 0 11 -1 12.95 0.38
 1 -12 0 0.51 0.09
 -1 12 0 0.47 0.14
 -7 -5 8 2.96 0.19
 7 5 -8 3.04 0.2
 -6 -6 7 3.14 0.18
 6 6 -7 3.19 0.21
 -5 -7 6 -0.01 0.05
 5 7 -6 -0.01 0.07
 -4 -8 5 2.84 0.14
 4 8 -5 2.88 0.17
 4 8 -5 3.05 0.21
 4 8 -5 3.17 0.19
 -3 -9 4 0.15 0.06
 -3 -9 4 0.09 0.04
 3 9 -4 0.06 0.08
 3 9 -4 0.11 0.06
 -2 -10 3 -0.04 0.05
 -2 -10 3 -0.02 0.03
 2 10 -3 0.07 0.07
 2 10 -3 0.06 0.05
 -1 -11 2 10.86 0.31
 -1 -11 2 11.21 0.27
 1 11 -2 11.24 0.35
 1 11 -2 11.94 0.47
 0 -12 1 8.19 0.25
 0 12 -1 8.73 0.41
 0 12 -1 8.34 0.29
 -7 -6 8 0.06 0.09
 7 6 -8 0 0.08
 -6 -7 7 9.09 0.32
 6 7 -7 8.88 0.37
 -5 -8 6 6.42 0.24
 5 8 -6 6.33 0.3
 -4 -9 5 2.25 0.11
 -4 -9 5 2.04 0.13
 4 9 -5 2.05 0.15
 4 9 -5 2.12 0.18
 -3 -10 4 4.04 0.17
 -3 -10 4 4.16 0.15
 3 10 -4 3.9 0.26
 3 10 -4 4.26 0.21
 -2 -11 3 0.1 0.06
 -2 -11 3 0.11 0.04
 2 11 -3 0.08 0.06
 2 11 -3 0.22 0.12
 -1 -12 2 2.07 0.11
 1 12 -2 2.09 0.14
 1 12 -2 2.12 0.21
 -6 -8 7 0.13 0.08
 6 8 -7 0.55 0.15
 -5 -9 6 3.11 0.17
 5 9 -6 3.25 0.22
 -4 -10 5 20.41 0.48
 -4 -10 5 19.99 0.54
 -3 -11 4 14.18 0.4
 -3 -11 4 14.03 0.35
 3 11 -4 14.28 0.47
 4 12 -2 2.42 0.28
 -4 -12 2 1.5 0.12
 -4 -12 2 1.62 0.1
 5 11 -3 5.71 0.3
 -5 -11 3 5.26 0.23
 -5 -11 3 5.7 0.2
 6 10 -4 2.94 0.22
 -6 -10 4 3.19 0.17
 7 9 -5 0.47 0.14
 -7 -9 5 0.49 0.11
 -3 -12 1 0.01 0.05
 -3 -12 1 0.01 0.06
 4 11 -2 8.21 0.36
 -4 -11 2 7.92 0.27
 -4 -11 2 7.8 0.24
 5 10 -3 5.6 0.28
 -5 -10 3 5.28 0.22
 6 9 -4 0.05 0.09
 -6 -9 4 0.09 0.07
 7 8 -5 -0.01 0.08
 -7 -8 5 0.08 0.07
 8 7 -6 0.18 0.1
 1 13 1 0.04 0.06
 -1 -13 -1 0.08 0.07
 2 12 0 3.25 0.17
 -2 -12 0 2.97 0.12
 -2 -12 0 3.03 0.14
 3 11 -1 1.33 0.11
 3 11 -1 1.82 0.22
 -3 -11 1 1.28 0.09
 -3 -11 1 1.41 0.1
 4 10 -2 15 0.5
 -4 -10 2 14.73 0.37
 -4 -10 2 14.88 0.42
 5 9 -3 3.92 0.22
 -5 -9 3 3.91 0.18
 6 8 -4 0.01 0.07
 -6 -8 4 -0.04 0.05
 7 7 -5 1.63 0.19
 -7 -7 5 1.92 0.19
 8 6 -6 1.77 0.21
 0 13 2 0.01 0.05
 1 12 1 2.14 0.13
 1 12 1 2.6 0.21
 -1 -12 -1 2.29 0.1
 -1 -12 -1 2.19 0.12
 2 11 0 4.88 0.2
 2 11 0 4.58 0.25
 2 11 0 4.75 0.27
 -2 -11 0 4.37 0.17
 -2 -11 0 4.62 0.15
 3 10 -1 6.29 0.24
 3 10 -1 6.12 0.28
 3 10 -1 6.28 0.31
 -3 -10 1 6.05 0.22
 -3 -10 1 6.26 0.19
 4 9 -2 71.68 1.63
 4 9 -2 69.98 1.65
 -4 -9 2 69.43 1.56
 5 8 -3 11.34 0.4
 -5 -8 3 11.52 0.34
 6 7 -4 12.58 0.43
 -6 -7 4 12.79 0.42
 -6 -7 4 12.91 0.39
 -6 -7 4 13.47 0.43
 7 6 -5 1.47 0.14
 -7 -6 5 1.66 0.15
 -7 -6 5 1.61 0.14
 8 5 -6 -0.07 0.06
 -8 -5 6 0.01 0.07
 -8 -5 6 -0.03 0.07
 0 12 2 2.25 0.19
 0 12 2 1.69 0.11
 0 -12 -2 1.7 0.11
 1 11 1 2.34 0.19
 1 11 1 2.19 0.12
 -1 -11 -1 2.09 0.11
 -1 -11 -1 2.19 0.1
 2 10 0 0.31 0.1
 2 10 0 0.28 0.1
 2 10 0 0.48 0.08
 -2 -10 0 0.41 0.06
 -2 -10 0 0.43 0.07
 3 9 -1 0.02 0.04
 3 9 -1 0.01 0.06
 3 9 -1 0.04 0.07
 -3 -9 1 0.05 0.05
 -3 -9 1 0.06 0.04
 4 8 -2 0.33 0.07
 4 8 -2 0.3 0.09
 4 8 -2 0.37 0.1
 -4 -8 2 0.42 0.08
 -4 -8 2 0.38 0.07
 -4 -8 2 0.17 0.07
 5 7 -3 0.03 0.05
 -5 -7 3 0.22 0.07
 -5 -7 3 0.01 0.05
 -5 -7 3 0.06 0.05
 6 6 -4 3.31 0.18
 -6 -6 4 3.02 0.17
 -6 -6 4 3.24 0.18
 -6 -6 4 3.2 0.17
 7 5 -5 7.58 0.3
 -7 -5 5 7.72 0.31
 -7 -5 5 7.56 0.32
 8 4 -6 1.38 0.17
 -8 -4 6 1.13 0.17
 -8 -4 6 1.34 0.19
 9 3 -7 0.11 0.08
 -9 -3 7 0.07 0.1
 -9 -3 7 0.07 0.1
 -1 12 3 3.55 0.24
 1 -12 -3 3.2 0.16
 0 11 2 0.1 0.08
 0 -11 -2 0.07 0.05
 1 10 1 0.12 0.07
 1 10 1 0.13 0.05
 1 10 1 0.09 0.07
 -1 -10 -1 0.16 0.04
 -1 -10 -1 0.15 0.05
 2 9 0 -0.03 0.05
 2 9 0 -0.01 0.05
 2 9 0 -0.02 0.03
 -2 -9 0 0.03 0.04
 -2 -9 0 0.07 0.05
 -2 -9 0 -0.05 0.03
 3 8 -1 0.03 0.03
 3 8 -1 0.04 0.05
 3 8 -1 0.1 0.06
 -3 -8 1 0.09 0.04
 -3 -8 1 0.1 0.06
 -3 -8 1 0.12 0.05
 -3 -8 1 0.05 0.04
 4 7 -2 3.3 0.17
 4 7 -2 3.53 0.16
 4 7 -2 3.42 0.19
 -4 -7 2 3.66 0.15
 -4 -7 2 3.53 0.16
 -4 -7 2 3.8 0.17
 5 6 -3 0.02 0.05
 5 6 -3 0.04 0.04
 -5 -6 3 0.45 0.08
 -5 -6 3 0.03 0.04
 -5 -6 3 0.01 0.05
 6 5 -4 1.1 0.14
 -6 -5 4 0.99 0.13
 -6 -5 4 1.01 0.14
 -6 -5 4 1.15 0.14
 7 4 -5 0.42 0.1
 -7 -4 5 0.39 0.11
 -7 -4 5 0.27 0.09
 8 3 -6 0.65 0.12
 -8 -3 6 0.54 0.13
 -8 -3 6 0.47 0.13
 9 2 -7 1.71 0.18
 -9 -2 7 1.63 0.23
 -9 -2 7 1.71 0.23
 -2 12 4 2.65 0.29
 2 -12 -4 1.56 0.12
 -1 11 3 -0.07 0.06
 1 -11 -3 -0.02 0.05
 0 10 2 1.98 0.16
 0 -10 -2 1.99 0.1
 1 9 1 0.38 0.1
 1 9 1 0.25 0.05
 1 9 1 0.34 0.09
 -1 -9 -1 0.28 0.05
 -1 -9 -1 0.23 0.04
 2 8 0 6.14 0.2
 2 8 0 5.95 0.26
 2 8 0 6.1 0.24
 -2 -8 0 5.88 0.17
 -2 -8 0 6.1 0.19
 3 7 -1 16.57 0.47
 3 7 -1 16.17 0.5
 3 7 -1 16.7 0.44
 -3 -7 1 16.42 0.42
 -3 -7 1 17.37 0.47
 -3 -7 1 16.74 0.46
 4 6 -2 0.77 0.09
 4 6 -2 0.9 0.12
 -4 -6 2 0.66 0.09
 -4 -6 2 0.85 0.09
 -4 -6 2 0.61 0.08
 5 5 -3 9.74 0.37
 5 5 -3 9.36 0.31
 5 5 -3 9.48 0.29
 -5 -5 3 9.26 0.32
 -5 -5 3 9.21 0.31
 -5 -5 3 9.75 0.3
 6 4 -4 0.18 0.07
 -6 -4 4 0.3 0.09
 -6 -4 4 0.29 0.08
 -6 -4 4 0.36 0.09
 7 3 -5 2.55 0.15
 -7 -3 5 2.5 0.18
 -7 -3 5 2.66 0.18
 8 2 -6 0.81 0.12
 -8 -2 6 0.69 0.14
 9 1 -7 1.55 0.12
 -9 -1 7 2.21 0.26
 -2 11 4 1.62 0.21
 2 -11 -4 1.04 0.09
 -1 10 3 3.84 0.23
 1 -10 -3 4.11 0.16
 0 9 2 1.43 0.16
 0 9 2 1.24 0.16
 0 -9 -2 0.92 0.07
 0 -9 -2 0.96 0.06
 1 8 1 8.67 0.3
 1 8 1 8.46 0.25
 1 8 1 9.21 0.33
 -1 -8 -1 8.69 0.24
 -1 -8 -1 8.53 0.22
 -1 -8 -1 8.75 0.27
 -1 -8 -1 9 0.28
 2 7 0 12.57 0.38
 2 7 0 12.87 0.41
 2 7 0 12.58 0.34
 -2 -7 0 12.76 0.33
 -2 -7 0 13.05 0.3
 -2 -7 0 13.38 0.37
 3 6 -1 1.72 0.09
 3 6 -1 1.81 0.11
 -3 -6 1 1.76 0.09
 4 5 -2 0.92 0.08
 4 5 -2 1.04 0.09
 4 5 -2 1.07 0.07
 -4 -5 2 0.95 0.07
 -4 -5 2 0.97 0.08
 -4 -5 2 0.96 0.08
 5 4 -3 0.28 0.05
 5 4 -3 0.42 0.08
 5 4 -3 0.34 0.07
 -5 -4 3 0.36 0.08
 -5 -4 3 0.33 0.07
 -5 -4 3 0.35 0.07
 6 3 -4 1.95 0.12
 -6 -3 4 1.94 0.14
 -6 -3 4 1.95 0.13
 -6 -3 4 1.86 0.13
 7 2 -5 1.02 0.1
 -7 -2 5 1.42 0.18
 8 1 -6 0.42 0.09
 -8 -1 6 0.5 0.13
 9 0 -7 0.45 0.09
 -9 0 7 0.33 0.12
 -3 11 5 2.88 0.22
 -3 11 5 2.99 0.23
 3 -11 -5 2.93 0.15
 -2 10 4 15.53 0.53
 2 -10 -4 15.35 0.42
 -1 9 3 19.15 0.59
 1 -9 -3 18.6 0.47
 0 8 2 0.25 0.07
 0 8 2 0.37 0.08
 0 -8 -2 0.41 0.05
 0 -8 -2 0.6 0.08
 0 -8 -2 0.53 0.06
 1 7 1 0 0.03
 1 7 1 0.01 0.02
 1 7 1 0.04 0.04
 -1 -7 -1 0.01 0.03
 -1 -7 -1 0 0.02
 -1 -7 -1 0.02 0.03
 -1 -7 -1 0.05 0.02
 2 6 0 2.84 0.14
 2 6 0 3 0.11
 -2 -6 0 3.21 0.13
 -2 -6 0 3.17 0.11
 -2 -6 0 3.01 0.13
 3 5 -1 71.38 1.56
 3 5 -1 69.86 1.56
 3 5 -1 68.65 1.65
 -3 -5 1 72.49 1.53
 4 4 -2 0.76 0.06
 4 4 -2 0.78 0.07
 4 4 -2 0.83 0.07
 -4 -4 2 0.79 0.07
 -4 -4 2 0.86 0.07
 -4 -4 2 0.77 0.07
 5 3 -3 4.03 0.17
 5 3 -3 3.71 0.16
 5 3 -3 3.79 0.14
 -5 -3 3 4.11 0.18
 -5 -3 3 3.88 0.18
 -5 -3 3 4.21 0.18
 6 2 -4 12.61 0.36
 -6 -2 4 12.31 0.41
 7 1 -5 16.14 0.45
 -7 -1 5 16.48 0.53
 8 0 -6 0.09 0.06
 -8 0 6 0.13 0.09
 9 -1 -7 1.17 0.12
 -9 1 7 1.24 0.21
 -3 10 5 4.25 0.26
 -3 10 5 3.93 0.24
 3 -10 -5 4.1 0.18
 -2 9 4 70.07 1.71
 2 -9 -4 67.48 1.52
 -1 8 3 81.96 1.87
 -1 8 3 84.79 1.99
 1 -8 -3 82.98 1.79
 0 7 2 7.99 0.27
 0 7 2 7.92 0.29
 0 -7 -2 7.85 0.2
 0 -7 -2 8.21 0.25
 0 -7 -2 8.4 0.22
 0 -7 -2 8.45 0.24
 1 6 1 156.65 3.36
 1 6 1 156.9 3.63
 -1 -6 -1 155.1 3.41
 -1 -6 -1 158.9 3.53
 -1 -6 -1 157.19 3.38
 -1 -6 -1 156.22 3.33
 -1 -6 -1 160.63 3.15
 2 5 0 2.11 0.1
 2 5 0 1.71 0.1
 2 5 0 1.71 0.08
 -2 -5 0 1.82 0.08
 -2 -5 0 1.6 0.09
 -2 -5 0 1.87 0.08
 3 4 -1 0.4 0.06
 3 4 -1 0.45 0.06
 3 4 -1 0.43 0.04
 -3 -4 1 0.6 0.05
 4 3 -2 67.63 1.49
 4 3 -2 69.28 1.59
 4 3 -2 67.67 1.5
 -4 -3 2 68.71 1.53
 -4 -3 2 68.49 1.51
 -4 -3 2 67.47 1.59
 5 2 -3 1 0.05
 5 2 -3 0.94 0.07
 -5 -2 3 0.97 0.09
 -5 -2 3 0.93 0.08
 -6 -1 4 5.06 0.23
 7 0 -5 0.23 0.06
 -7 0 5 0.15 0.08
 8 -1 -6 1 0.11
 -8 1 6 1.07 0.18
 -4 10 6 1.44 0.21
 -4 10 6 1.57 0.23
 4 -10 -6 1.14 0.1
 -3 9 5 2.86 0.19
 -3 9 5 2.93 0.2
 3 -9 -5 2.93 0.14
 -2 8 4 0.92 0.14
 -2 8 4 1.29 0.16
 2 -8 -4 0.91 0.08
 -1 7 3 0.71 0.1
 -1 7 3 0.92 0.12
 1 -7 -3 0.66 0.06
 1 -7 -3 0.79 0.09
 1 -7 -3 0.78 0.08
 0 6 2 22.14 0.61
 0 6 2 23.1 0.58
 0 -6 -2 23.26 0.52
 0 -6 -2 23.71 0.56
 0 -6 -2 22.22 0.55
 0 -6 -2 22.34 0.48
 1 5 1 37.91 0.89
 1 5 1 38.9 0.95
 1 5 1 38.62 0.86
 -1 -5 -1 40.14 0.79
 -1 -5 -1 40.08 0.86
 -1 -5 -1 37.72 0.89
 -1 -5 -1 40.65 0.91
 2 4 0 28.45 0.65
 2 4 0 27.22 0.63
 2 4 0 27.69 0.69
 -2 -4 0 27.83 0.66
 -2 -4 0 27.59 0.64
 -2 -4 0 27.4 0.62
 3 3 -1 12.32 0.35
 3 3 -1 12.44 0.32
 3 3 -1 13.2 0.33
 -3 -3 1 13.36 0.33
 4 2 -2 31.47 0.7
 4 2 -2 30.85 0.72
 -4 -2 2 31.74 0.74
 -4 -2 2 31.79 0.76
 -5 -1 3 27.7 0.69
 -5 -1 3 26.84 0.7
 6 0 -4 15.21 0.42
 -6 0 4 17.9 0.51
 7 -1 -5 0.49 0.08
 -7 1 5 0.47 0.12
 8 -2 -6 0.02 0.04
 -8 2 6 0.03 0.09
 -4 9 6 0.12 0.09
 -4 9 6 0.01 0.08
 4 -9 -6 0.28 0.07
 -3 8 5 26.45 0.74
 -3 8 5 26.39 0.77
 3 -8 -5 25.62 0.64
 -2 7 4 17.74 0.49
 -2 7 4 17.04 0.52
 2 -7 -4 16.7 0.43
 -1 6 3 9.29 0.31
 -1 6 3 9.34 0.29
 1 -6 -3 9.33 0.27
 1 -6 -3 9.36 0.25
 1 -6 -3 9.64 0.28
 0 5 2 0.37 0.06
 0 5 2 0.24 0.05
 0 -5 -2 0.37 0.05
 0 -5 -2 0.3 0.04
 0 -5 -2 0.31 0.04
 0 -5 -2 0.26 0.03
 1 4 1 119.21 2.56
 1 4 1 117.72 2.67
 1 4 1 122.08 2.55
 -1 -4 -1 114.71 2.5
 -1 -4 -1 115.99 2.57
 -1 -4 -1 116.22 2.63
 -1 -4 -1 118.75 2.33
 2 3 0 350.25 8.35
 2 3 0 363.56 8.85
 2 3 0 360.27 9.51
 -2 -3 0 355.41 8.26
 -2 -3 0 342.21 7.65
 -2 -3 0 379.25 8.69
 -2 -3 0 362.76 9.11
 3 2 -1 73.33 1.6
 3 2 -1 73.42 1.57
 -3 -2 1 69.18 1.6
 -3 -2 1 77.38 1.6
 4 1 -2 18.23 0.4
 -4 -1 2 17.19 0.47
 -4 -1 2 17.77 0.47
 -4 -1 2 18.35 0.45
 -4 -1 2 19.49 0.49
 5 0 -3 2.51 0.11
 5 0 -3 2.35 0.12
 -5 0 3 2.57 0.14
 -5 0 3 2.53 0.13
 6 -1 -4 16.81 0.42
 -6 1 4 16.56 0.51
 7 -2 -5 0.83 0.09
 -7 2 5 0.93 0.15
 8 -3 -6 1.88 0.1
 -8 3 6 2.22 0.25
 -5 9 7 2.52 0.22
 -5 9 7 2.38 0.22
 5 -9 -7 2.34 0.14
 -4 8 6 0.1 0.08
 -4 8 6 0.13 0.08
 4 -8 -6 0.17 0.06
 -3 7 5 1.59 0.14
 -3 7 5 1.78 0.14
 3 -7 -5 1.57 0.1
 -2 6 4 1.12 0.09
 -2 6 4 1.2 0.1
 -2 6 4 1.09 0.09
 2 -6 -4 1.06 0.08
 2 -6 -4 1.07 0.08
 2 -6 -4 1.13 0.07
 -1 5 3 3.47 0.15
 -1 5 3 3.61 0.14
 1 -5 -3 3.43 0.13
 1 -5 -3 3.18 0.11
 1 -5 -3 3.58 0.13
 0 4 2 21.4 0.51
 0 4 2 21.25 0.54
 0 -4 -2 21.11 0.44
 0 -4 -2 20.96 0.47
 0 -4 -2 21.19 0.5
 0 -4 -2 21.53 0.5
 1 3 1 109.86 2.28
 1 3 1 107.47 2.25
 1 3 1 104.35 2.25
 1 3 1 101.64 2.36
 -1 -3 -1 97.92 2.2
 -1 -3 -1 103.2 2.33
 -1 -3 -1 101.47 2.23
 2 2 0 612.66 13.65
 2 2 0 600.91 14.01
 -2 -2 0 608.71 14.2
 -2 -2 0 627.21 14.88
 -2 -2 0 605.84 14
 -3 -1 1 0.64 0.05
 -3 -1 1 0.36 0.05
 -3 -1 1 0.64 0.04
 4 0 -2 121.27 2.69
 4 0 -2 120.54 2.67
 -4 0 2 129.74 2.73
 -4 0 2 127.54 2.71
 -4 0 2 125.48 2.72
 5 -1 -3 15.87 0.39
 5 -1 -3 16.43 0.4
 -5 1 3 16.49 0.42
 -5 1 3 15.98 0.47
 -5 1 3 16.18 0.45
 6 -2 -4 1.65 0.08
 -6 2 4 1.61 0.13
 7 -3 -5 0.06 0.04
 -7 3 5 0.01 0.06
 8 -4 -6 0.58 0.06
 -8 4 6 0.58 0.15
 -5 8 7 0.05 0.08
 5 -8 -7 0.02 0.05
 -4 7 6 2.26 0.18
 -4 7 6 2.13 0.17
 4 -7 -6 2.21 0.12
 -3 6 5 0.7 0.11
 -3 6 5 0.67 0.11
 -3 6 5 0.69 0.11
 3 -6 -5 0.75 0.09
 -2 5 4 0.37 0.07
 -2 5 4 0.49 0.08
 -2 5 4 0.47 0.08
 2 -5 -4 0.5 0.07
 2 -5 -4 0.5 0.07
 2 -5 -4 0.45 0.06
 -1 4 3 1.07 0.07
 -1 4 3 1.18 0.07
 1 -4 -3 1.27 0.07
 1 -4 -3 1.19 0.06
 1 -4 -3 1.25 0.07
 0 3 2 4.1 0.1
 0 3 2 3.97 0.12
 0 3 2 4.06 0.14
 0 3 2 4.05 0.13
 0 -3 -2 3.93 0.12
 0 -3 -2 3.99 0.12
 0 -3 -2 3.9 0.11
 0 -3 -2 4.01 0.1
 1 2 1 93.17 2
 1 2 1 92.77 1.98
 1 2 1 90.29 1.99
 -1 -2 -1 93.18 2.07
 -1 -2 -1 93.46 1.98
 -1 -2 -1 90.93 2
 -1 -2 -1 90.52 2.01
 2 1 0 229.74 5.22
 -2 -1 0 231.9 5.26
 -2 -1 0 230.57 5.75
 -3 0 1 20.77 0.47
 -3 0 1 21.46 0.5
 4 -1 -2 70.73 1.49
 4 -1 -2 69.5 1.49
 -4 1 2 70.53 1.53
 -4 1 2 68.84 1.55
 -4 1 2 69.61 1.57
 5 -2 -3 5.26 0.16
 5 -2 -3 5.45 0.17
 -5 2 3 5.18 0.22
 -5 2 3 5.48 0.19
 6 -3 -4 0.33 0.05
 -6 3 4 0.77 0.13
 7 -4 -5 0.53 0.06
 -7 4 5 0.73 0.15
 -8 5 6 -0.02 0.09
 -6 8 8 0.06 0.11
 6 -8 -8 0.14 0.07
 -5 7 7 3.21 0.23
 5 -7 -7 2.94 0.15
 -4 6 6 0.11 0.07
 -4 6 6 0.22 0.09
 4 -6 -6 0.09 0.05
 -3 5 5 0.06 0.05
 -3 5 5 0.12 0.06
 -3 5 5 0.15 0.06
 3 -5 -5 0.18 0.05
 3 -5 -5 0.09 0.05
 3 -5 -5 0.09 0.04
 -2 4 4 1.17 0.09
 -2 4 4 1.17 0.09
 -2 4 4 1.17 0.08
 2 -4 -4 1.23 0.08
 2 -4 -4 1.12 0.08
 2 -4 -4 1.35 0.07
 -1 3 3 2.72 0.12
 -1 3 3 2.79 0.11
 -1 3 3 2.86 0.11
 1 -3 -3 2.76 0.09
 1 -3 -3 2.66 0.1
 1 -3 -3 2.77 0.11
 1 -3 -3 2.74 0.1
 0 2 2 40.51 0.86
 0 2 2 38.22 0.89
 0 2 2 38.63 0.84
 0 2 2 39.72 0.77
 0 -2 -2 39.39 0.86
 0 -2 -2 38.65 0.78
 0 -2 -2 38.45 0.84
 0 -2 -2 38 0.88
 1 1 1 44.66 0.95
 -1 -1 -1 46.15 1.21
 -2 0 0 8.91 0.22
 -2 0 0 9.17 0.22
 -2 0 0 9.49 0.23
 3 -1 -1 3.79 0.1
 -3 1 1 3.7 0.1
 -3 1 1 3.91 0.13
 4 -2 -2 10.3 0.25
 4 -2 -2 9.58 0.24
 -4 2 2 10.18 0.26
 -4 2 2 10.06 0.31
 -4 2 2 9.54 0.3
 -4 2 2 9.97 0.28
 5 -3 -3 0.12 0.03
 5 -3 -3 0.09 0.03
 -5 3 3 0.06 0.04
 -5 3 3 0.17 0.06
 6 -4 -4 0.56 0.05
 -6 4 4 0.85 0.14
 7 -5 -5 0.64 0.04
 -7 5 5 0.93 0.17
 -6 7 8 0.41 0.14
 6 -7 -8 0.54 0.1
 -5 6 7 1.64 0.21
 5 -6 -7 1.28 0.1
 -4 5 6 0.87 0.13
 -4 5 6 1.12 0.15
 4 -5 -6 1.18 0.08
 -3 4 5 2.61 0.14
 -3 4 5 2.6 0.15
 3 -4 -5 2.59 0.11
 3 -4 -5 2.35 0.13
 3 -4 -5 3.05 0.13
 -2 3 4 2.35 0.11
 2 -3 -4 2.22 0.09
 2 -3 -4 2.13 0.09
 2 -3 -4 2.17 0.1
 2 -3 -4 2.24 0.11
 -1 2 3 20.58 0.49
 -1 2 3 21.28 0.48
 -1 2 3 19.94 0.5
 1 -2 -3 20.14 0.49
 1 -2 -3 21 0.48
 1 -2 -3 20.6 0.47
 1 -2 -3 21.06 0.5
 0 1 2 15.9 0.37
 0 1 2 15.51 0.36
 0 1 2 16.18 0.31
 0 -1 -2 15.77 0.36
 0 -1 -2 15.87 0.36
 0 -1 -2 15.55 0.35
 0 -1 -2 15.48 0.36
 -2 1 0 0.09 0.02
 -2 1 0 0.15 0.02
 -2 1 0 0.1 0.02
 3 -2 -1 0.37 0.02
 3 -2 -1 0.4 0.03
 -3 2 1 0.48 0.06
 -3 2 1 0.5 0.05
 4 -3 -2 1.22 0.05
 4 -3 -2 1.31 0.06
 -4 3 2 1.17 0.08
 -4 3 2 1.31 0.09
 -4 3 2 1.22 0.09
 -4 3 2 1.3 0.07
 5 -4 -3 0.13 0.03
 -5 4 3 0.12 0.06
 -5 4 3 0.2 0.07
 6 -5 -4 5.82 0.16
 -6 5 4 5.7 0.27
 -6 5 4 5.25 0.27
 -7 6 5 2.05 0.25
 -6 6 8 1.2 0.2
 6 -6 -8 1.01 0.12
 -5 5 7 7.16 0.33
 5 -5 -7 7.42 0.25
 -4 4 6 3.02 0.19
 -4 4 6 3.1 0.17
 4 -4 -6 3.23 0.14
 -3 3 5 0.74 0.1
 -3 3 5 0.55 0.09
 3 -3 -5 0.7 0.08
 3 -3 -5 0.64 0.08
 3 -3 -5 0.56 0.08
 3 -3 -5 0.52 0.05
 -2 2 4 60.14 1.31
 -2 2 4 61.18 1.35
 2 -2 -4 57.63 1.3
 2 -2 -4 56.57 1.32
 2 -2 -4 59.41 1.28
 -1 1 3 5.96 0.17
 -1 1 3 5.67 0.18
 1 -1 -3 5.72 0.15
 1 -1 -3 5.73 0.17
 1 -1 -3 5.42 0.16
 0 0 2 3.24 0.07
 0 0 2 3.28 0.1
 0 0 -2 3.15 0.1
 0 0 -2 3.71 0.08
 0 0 -2 3.23 0.09
 0 0 -2 2.85 0.09
 -1 1 -1 54.65 1.21
 -1 1 -1 54.28 1.35
 -1 1 -1 54.29 1.3
 -2 2 0 3.64 0.12
 -2 2 0 3.66 0.11
 -2 2 0 3.49 0.1
 3 -3 -1 27.62 0.61
 3 -3 -1 29.32 0.61
 -3 3 1 27.52 0.64
 -3 3 1 28.03 0.69
 4 -4 -2 3.51 0.11
 4 -4 -2 3.32 0.1
 -4 4 2 3.32 0.15
 -4 4 2 3.32 0.13
 -4 4 2 3.27 0.16
 5 -5 -3 4.77 0.14
 5 -5 -3 4.92 0.15
 -5 5 3 5.11 0.23
 -5 5 3 4.63 0.22
 6 -6 -4 8.39 0.2
 -6 6 4 8.12 0.35
 -6 6 4 8.47 0.36
 -7 7 5 0.01 0.09
 -6 5 8 2.37 0.21
 6 -5 -8 2.1 0.13
 -5 4 7 2.89 0.2
 5 -4 -7 2.71 0.14
 -4 3 6 0.46 0.1
 -4 3 6 0.52 0.09
 4 -3 -6 0.47 0.07
 4 -3 -6 0.5 0.08
 4 -3 -6 0.43 0.08
 4 -3 -6 0.49 0.06
 -3 2 5 19.37 0.55
 -3 2 5 20.12 0.53
 3 -2 -5 20.68 0.52
 3 -2 -5 19.85 0.53
 3 -2 -5 19.71 0.49
 3 -2 -5 19.49 0.48
 -2 1 4 37.81 0.91
 -2 1 4 41.3 0.9
 2 -1 -4 38.11 0.88
 2 -1 -4 37.74 0.9
 2 -1 -4 39.25 0.86
 2 -1 -4 39.4 0.92
 -1 0 3 6.61 0.2
 -1 0 3 6.63 0.19
 1 0 -3 6.88 0.17
 1 0 -3 6.73 0.18
 1 0 -3 6.84 0.19
 1 0 -3 6.41 0.19
 0 -1 2 148.97 3.19
 0 1 -2 153.02 3.2
 0 1 -2 153.64 3.2
 0 1 -2 135.95 3.98
 1 -2 1 7.61 0.17
 1 -2 1 7.88 0.17
 -1 2 -1 7.81 0.19
 -1 2 -1 7.89 0.19
 -1 2 -1 7.56 0.2
 2 -3 0 0.28 0.02
 -2 3 0 0.29 0.03
 -2 3 0 0.4 0.04
 3 -4 -1 0.35 0.03
 3 -4 -1 0.3 0.03
 -3 4 1 0.22 0.05
 -3 4 1 0.26 0.04
 4 -5 -2 1.83 0.07
 -4 5 2 1.97 0.12
 -4 5 2 1.8 0.12
 5 -6 -3 2.58 0.09
 -5 6 3 2.67 0.17
 -5 6 3 2.56 0.17
 -6 7 4 3.95 0.24
 -6 7 4 4.63 0.26
 -7 5 9 4.48 0.3
 7 -5 -9 4.58 0.21
 -6 4 8 0.62 0.14
 6 -4 -8 0.86 0.12
 -5 3 7 5.54 0.28
 -5 3 7 6.06 0.27
 5 -3 -7 5.86 0.22
 -4 2 6 0.37 0.08
 -4 2 6 0.34 0.08
 4 -2 -6 0.49 0.09
 4 -2 -6 0.39 0.06
 4 -2 -6 0.53 0.08
 4 -2 -6 0.6 0.09
 -3 1 5 0.12 0.05
 3 -1 -5 0.25 0.04
 3 -1 -5 0.19 0.05
 3 -1 -5 0.15 0.04
 3 -1 -5 0.16 0.04
 -2 0 4 0.82 0.09
 2 0 -4 0.56 0.05
 2 0 -4 0.54 0.05
 2 0 -4 0.52 0.04
 2 0 -4 0.56 0.04
 -1 -1 3 2.69 0.11
 -1 -1 3 2.75 0.1
 -1 -1 3 2.97 0.11
 1 1 -3 2.96 0.1
 1 1 -3 2.77 0.1
 1 1 -3 2.7 0.1
 1 1 -3 2.72 0.09
 0 -2 2 0.89 0.04
 0 -2 2 0.85 0.03
 0 2 -2 0.76 0.04
 0 2 -2 0.76 0.04
 1 -3 1 35.46 0.74
 -1 3 -1 33.84 0.77
 2 -4 0 19.54 0.42
 2 -4 0 18.07 0.41
 -2 4 0 17.98 0.44
 -2 4 0 18.1 0.48
 3 -5 -1 7.95 0.2
 3 -5 -1 8.31 0.21
 -3 5 1 7.56 0.27
 -3 5 1 7.73 0.23
 4 -6 -2 22.33 0.51
 4 -6 -2 23.7 0.52
 -4 6 2 21.71 0.61
 -4 6 2 22.84 0.64
 5 -7 -3 2.55 0.08
 -5 7 3 3.06 0.19
 -5 7 3 2.54 0.17
 -6 8 4 0.28 0.11
 -6 8 4 0.35 0.11
 -7 4 9 2.92 0.24
 7 -4 -9 3.03 0.17
 -6 3 8 7.03 0.34
 6 -3 -8 7.31 0.26
 -5 2 7 2.66 0.19
 -5 2 7 3.06 0.19
 5 -2 -7 2.76 0.14
 -4 1 6 2.53 0.16
 -4 1 6 2.67 0.15
 4 -1 -6 2.82 0.15
 4 -1 -6 2.97 0.14
 4 -1 -6 2.7 0.13
 4 -1 -6 2.84 0.13
 -3 0 5 1.44 0.1
 3 0 -5 1.47 0.08
 3 0 -5 1.81 0.1
 3 0 -5 1.61 0.09
 3 0 -5 1.37 0.08
 -2 -1 4 -0.01 0.02
 -2 -1 4 0.05 0.03
 2 1 -4 0 0.02
 2 1 -4 -0.01 0.02
 2 1 -4 -0.01 0.02
 2 1 -4 0.01 0.02
 -1 -2 3 0.97 0.05
 -1 -2 3 0.77 0.04
 1 2 -3 0.68 0.05
 1 2 -3 0.77 0.05
 1 2 -3 0.76 0.04
 1 -4 1 25.84 0.56
 1 -4 1 24.42 0.54
 1 -4 1 25.3 0.58
 -1 4 -1 24.3 0.62
 -1 4 -1 24.69 0.58
 2 -5 0 1.52 0.07
 2 -5 0 1.4 0.06
 -2 5 0 1.4 0.08
 -2 5 0 1.38 0.09
 3 -6 -1 31.27 0.7
 -3 6 1 32.55 0.83
 4 -7 -2 2.55 0.09
 -4 7 2 2.64 0.16
 -5 8 3 1.26 0.17
 -5 8 3 1.77 0.21
 -7 3 9 0.07 0.09
 7 -3 -9 0.17 0.08
 -6 2 8 10.69 0.43
 6 -2 -8 10.44 0.34
 -5 1 7 47.93 1.22
 -5 1 7 48.05 1.18
 5 -1 -7 48.21 1.12
 -4 0 6 7.27 0.27
 -4 0 6 7.7 0.29
 4 0 -6 7.6 0.26
 4 0 -6 7.39 0.24
 4 0 -6 7.34 0.24
 4 0 -6 7.28 0.27
 -3 -1 5 14.2 0.4
 -3 -1 5 14.35 0.42
 3 1 -5 15.2 0.41
 3 1 -5 14.62 0.38
 3 1 -5 14.72 0.41
 3 1 -5 14 0.39
 -2 -2 4 16.41 0.44
 -2 -2 4 15.98 0.41
 -2 -2 4 16.86 0.43
 2 2 -4 15.69 0.41
 2 2 -4 16.86 0.41
 -1 -3 3 24.76 0.56
 -1 -3 3 25.29 0.59
 -1 -3 3 25.82 0.6
 1 3 -3 25.16 0.59
 0 -4 2 86.98 1.85
 0 -4 2 83.05 1.69
 0 4 -2 87.46 1.85
 0 4 -2 83.64 1.94
 1 -5 1 1.3 0.07
 1 -5 1 1.3 0.05
 1 -5 1 1.26 0.07
 -1 5 -1 1.36 0.09
 -1 5 -1 1.36 0.08
 2 -6 0 24.35 0.55
 2 -6 0 23.3 0.53
 -2 6 0 23.52 0.64
 3 -7 -1 2.78 0.1
 -3 7 1 2.82 0.16
 4 -8 -2 1.06 0.05
 -4 8 2 1.4 0.17
 -5 9 3 0.24 0.1
 -5 9 3 0.22 0.1
 -7 2 9 0.95 0.18
 7 -2 -9 0.79 0.13
 -6 1 8 23.86 0.73
 -6 1 8 23.77 0.7
 6 -1 -8 23.59 0.63
 -5 0 7 67.99 1.61
 -5 0 7 66.26 1.56
 5 0 -7 65.1 1.51
 5 0 -7 68.54 1.52
 -4 -1 6 1.37 0.14
 -4 -1 6 1.08 0.14
 4 1 -6 0.92 0.08
 4 1 -6 0.81 0.07
 -3 -2 5 67.44 1.57
 -3 -2 5 69.99 1.53
 -3 -2 5 68.81 1.63
 3 2 -5 70.89 1.52
 3 2 -5 67.94 1.55
 -2 -3 4 5.41 0.18
 -2 -3 4 5.17 0.17
 -2 -3 4 5.26 0.18
 2 3 -4 5.27 0.18
 2 3 -4 5.05 0.17
 2 3 -4 5.42 0.19
 -1 -4 3 0.68 0.07
 -1 -4 3 0.43 0.04
 -1 -4 3 0.41 0.04
 1 4 -3 0.54 0.07
 1 4 -3 0.39 0.03
 1 4 -3 0.56 0.08
 0 -5 2 1.6 0.08
 0 -5 2 1.55 0.05
 0 5 -2 1.62 0.1
 0 5 -2 1.68 0.09
 1 -6 1 0 0.02
 1 -6 1 0.06 0.03
 1 -6 1 0.01 0.02
 -1 6 -1 0.04 0.04
 -1 6 -1 0 0.03
 2 -7 0 0.05 0.03
 -2 7 0 0.01 0.04
 3 -8 -1 0.17 0.04
 -3 8 1 0.17 0.07
 4 -9 -2 -0.02 0.02
 -4 9 2 0.01 0.07
 -5 10 3 -0.04 0.08
 -7 1 9 10.64 0.45
 7 -1 -9 10.33 0.36
 -6 0 8 4.33 0.23
 -6 0 8 4.32 0.25
 6 0 -8 4.21 0.2
 -5 -1 7 8.42 0.34
 -5 -1 7 9.05 0.33
 5 1 -7 9.01 0.3
 5 1 -7 9.65 0.3
 -4 -2 6 4.68 0.21
 -4 -2 6 4.45 0.21
 -4 -2 6 4.49 0.19
 4 2 -6 4.65 0.19
 4 2 -6 4.42 0.2
 4 2 -6 4.59 0.18
 -3 -3 5 0.17 0.05
 -3 -3 5 0.11 0.05
 -3 -3 5 0.18 0.06
 3 3 -5 0.18 0.04
 3 3 -5 0.32 0.06
 3 3 -5 0.16 0.05
 -2 -4 4 0.48 0.05
 -2 -4 4 0.65 0.08
 -2 -4 4 0.62 0.07
 2 4 -4 0.65 0.07
 2 4 -4 0.63 0.09
 2 4 -4 0.55 0.08
 -1 -5 3 28.37 0.68
 -1 -5 3 28.47 0.68
 -1 -5 3 27.88 0.63
 1 5 -3 26.9 0.72
 1 5 -3 29.23 0.69
 1 5 -3 27.9 0.65
 0 -6 2 4.67 0.17
 0 -6 2 4.41 0.11
 0 6 -2 4.34 0.19
 0 6 -2 4.68 0.18
 1 -7 1 24.68 0.56
 -1 7 -1 24.77 0.68
 2 -8 0 5.46 0.16
 -2 8 0 5.47 0.25
 3 -9 -1 22.72 0.53
 -3 9 1 23.58 0.7
 -4 10 2 -0.07 0.06
 7 0 -9 5.92 0.26
 -6 -1 8 49.15 1.27
 -6 -1 8 50.1 1.23
 6 1 -8 48.34 1.18
 -5 -2 7 15.15 0.49
 -5 -2 7 15.06 0.46
 -5 -2 7 14.9 0.48
 5 2 -7 15.04 0.44
 5 2 -7 14.25 0.43
 -4 -3 6 5.74 0.23
 -4 -3 6 5.2 0.21
 -4 -3 6 5.53 0.23
 4 3 -6 5.48 0.21
 4 3 -6 5.54 0.21
 4 3 -6 5.31 0.23
 -3 -4 5 0.84 0.1
 -3 -4 5 0.75 0.07
 -3 -4 5 0.73 0.07
 3 4 -5 0.89 0.11
 3 4 -5 0.87 0.1
 3 4 -5 0.8 0.1
 -2 -5 4 21.57 0.51
 -2 -5 4 22.52 0.56
 -2 -5 4 21.29 0.55
 2 5 -4 21.05 0.54
 2 5 -4 22.29 0.56
 2 5 -4 21.59 0.6
 -1 -6 3 34.38 0.81
 -1 -6 3 34.04 0.76
 1 6 -3 34.3 0.82
 1 6 -3 33.06 0.87
 1 6 -3 33.52 0.78
 0 -7 2 5.05 0.13
 0 7 -2 4.83 0.22
 1 -8 1 4.98 0.15
 -1 8 -1 5.02 0.24
 2 -9 0 30.27 0.69
 -2 9 0 30.24 0.86
 3 -10 -1 17.69 0.42
 -3 10 1 18.04 0.6
 7 1 -9 2.96 0.19
 -6 -2 8 0.16 0.09
 6 2 -8 0.09 0.08
 -5 -3 7 17.53 0.53
 -5 -3 7 17.71 0.54
 -5 -3 7 16.98 0.5
 5 3 -7 16.82 0.49
 5 3 -7 16.99 0.5
 -4 -4 6 6.87 0.24
 -4 -4 6 6.75 0.26
 4 4 -6 6.92 0.26
 4 4 -6 7.09 0.28
 4 4 -6 6.96 0.26
 -3 -5 5 1.65 0.11
 -3 -5 5 1.49 0.1
 -3 -5 5 1.76 0.1
 3 5 -5 1.51 0.11
 3 5 -5 1.74 0.11
 3 5 -5 1.66 0.12
 -2 -6 4 0.64 0.06
 2 6 -4 1.13 0.13
 2 6 -4 0.7 0.06
 2 6 -4 0.96 0.12
 -1 -7 3 3.91 0.12
 -1 -7 3 4.34 0.14
 1 7 -3 4.03 0.21
 1 7 -3 4.27 0.21
 1 7 -3 4.3 0.15
 0 -8 2 1.05 0.05
 0 -8 2 1.06 0.06
 0 8 -2 1.44 0.17
 1 -9 1 13.81 0.34
 -1 9 -1 13.39 0.47
 2 -10 0 2.14 0.1
 -2 10 0 2.13 0.18
 3 -11 -1 16.4 0.37
 -3 11 1 16.51 0.59
 -7 -2 9 2.18 0.18
 7 2 -9 2.39 0.17
 -6 -3 8 0.07 0.07
 6 3 -8 0.01 0.07
 -5 -4 7 1.77 0.13
 5 4 -7 1.74 0.13
 5 4 -7 1.69 0.14
 -4 -5 6 7.81 0.26
 4 5 -6 7.73 0.28
 4 5 -6 7.63 0.29
 4 5 -6 7.83 0.31
 -3 -6 5 8.05 0.25
 3 6 -5 8.03 0.28
 3 6 -5 7.86 0.31
 3 6 -5 8.41 0.3
 -2 -7 4 13.59 0.32
 -2 -7 4 13.54 0.36
 2 7 -4 13.57 0.38
 2 7 -4 13.94 0.43
 2 7 -4 13.56 0.45
 -1 -8 3 3.76 0.11
 -1 -8 3 3.89 0.14
 1 8 -3 3.82 0.15
 1 8 -3 3.67 0.21
 0 -9 2 0.07 0.04
 0 9 -2 0.1 0.04
 0 9 -2 0.12 0.08
 1 -10 1 0.77 0.07
 -1 10 -1 1.28 0.18
 2 -11 0 0.23 0.05
 -2 11 0 0.22 0.1
 -7 -3 9 -0.03 0.07
 7 3 -9 0.02 0.08
 -6 -4 8 5.13 0.24
 6 4 -8 5.03 0.25
 -5 -5 7 0.26 0.08
 5 5 -7 0.23 0.08
 5 5 -7 0.18 0.08
 -4 -6 6 3.76 0.16
 4 6 -6 4.12 0.2
 4 6 -6 3.71 0.2
 4 6 -6 3.78 0.22
 -3 -7 5 13.31 0.36
 3 7 -5 12.93 0.42
 3 7 -5 12.9 0.46
 3 7 -5 13.37 0.4
 -2 -8 4 21.19 0.47
 -2 -8 4 20.83 0.52
 2 8 -4 20.7 0.56
 2 8 -4 21.59 0.65
 -1 -9 3 0.18 0.05
 -1 -9 3 0.03 0.03
 1 9 -3 -0.02 0.03
 1 9 -3 0.04 0.07
 0 -10 2 15.73 0.39
 0 10 -2 16.78 0.57
 0 10 -2 15.59 0.43
 1 -11 1 1.17 0.08
 -1 11 -1 1.97 0.24
 -7 -4 9 0.08 0.09
 7 4 -9 0.05 0.09
 -6 -5 8 2.77 0.17
 6 5 -8 3 0.2
 -5 -6 7 2.09 0.14
 5 6 -7 2.26 0.16
 5 6 -7 2.27 0.17
 -4 -7 6 0.01 0.05
 4 7 -6 0.05 0.07
 4 7 -6 0.05 0.07
 4 7 -6 0.01 0.04
 -3 -8 5 2.53 0.11
 -3 -8 5 2.48 0.13
 3 8 -5 2.63 0.19
 3 8 -5 2.47 0.15
 -2 -9 4 4.88 0.18
 -2 -9 4 5.23 0.15
 2 9 -4 4.76 0.26
 2 9 -4 4.85 0.21
 -1 -10 3 1.18 0.06
 -1 -10 3 1.13 0.08
 1 10 -3 1.65 0.16
 1 10 -3 1.23 0.1
 0 -11 2 14.96 0.38
 0 11 -2 14.58 0.42
 0 11 -2 14.79 0.55
 -7 -5 9 2.05 0.22
 -6 -6 8 1.4 0.13
 6 6 -8 2.26 0.24
 -5 -7 7 7.3 0.27
 5 7 -7 7.5 0.33
 -4 -8 6 1.26 0.13
 4 8 -6 1.81 0.22
 4 8 -6 1.5 0.16
 -3 -9 5 16.52 0.45
 -3 -9 5 17.17 0.41
 3 9 -5 17.43 0.52
 3 9 -5 17.98 0.6
 -2 -10 4 2.94 0.11
 -2 -10 4 3.1 0.14
 2 10 -4 3.3 0.23
 2 10 -4 3.1 0.17
 -1 -11 3 0 0.05
 1 11 -3 -0.02 0.09
 1 11 -3 0.1 0.06
 -6 -7 8 0.07 0.08
 6 7 -8 -0.01 0.09
 -5 -8 7 0.06 0.06
 5 8 -7 0.1 0.09
 -4 -9 6 7.56 0.26
 -4 -9 6 7.32 0.22
 4 9 -6 7.31 0.31
 -3 -10 5 16.13 0.44
 -3 -10 5 15.92 0.39
 3 10 -5 16.34 0.6
 3 10 -5 17.04 0.52
 -2 -11 4 4.18 0.13
 -2 -11 4 4.14 0.16
 2 11 -4 3.92 0.2
 2 11 -4 4.39 0.28
 6 11 -3 3.91 0.26
 -6 -11 3 4.18 0.2
 4 12 -1 0.45 0.15
 -4 -12 1 0.29 0.09
 -4 -12 1 0.31 0.07
 5 11 -2 0.01 0.09
 -5 -11 2 0.01 0.05
 -5 -11 2 0.02 0.06
 6 10 -3 0.26 0.11
 -6 -10 3 0.08 0.07
 7 9 -4 0.72 0.15
 -7 -9 4 0.7 0.12
 8 8 -5 0.15 0.1
 -2 -13 -1 0.63 0.1
 -2 -13 -1 0.48 0.07
 3 12 0 2.08 0.19
 -3 -12 0 2.24 0.11
 -3 -12 0 2.18 0.13
 4 11 -1 1.43 0.19
 -4 -11 1 1.39 0.14
 -4 -11 1 1.1 0.09
 5 10 -2 2.43 0.18
 -5 -10 2 2.43 0.14
 6 9 -3 0.71 0.14
 -6 -9 3 0.46 0.09
 7 8 -4 0.02 0.07
 8 7 -5 0.35 0.11
 1 13 2 0.4 0.09
 -1 -13 -2 0.49 0.09
 2 12 1 0.37 0.08
 2 12 1 0.23 0.1
 -2 -12 -1 0.37 0.06
 -2 -12 -1 0.45 0.09
 3 11 0 0.52 0.13
 3 11 0 0.39 0.08
 -3 -11 0 0.69 0.1
 -3 -11 0 0.49 0.07
 4 10 -1 16.15 0.52
 -4 -10 1 16.23 0.44
 -4 -10 1 15.78 0.4
 5 9 -2 22.94 0.66
 -5 -9 2 22.8 0.59
 6 8 -3 1.61 0.14
 -6 -8 3 1.67 0.14
 -6 -8 3 1.84 0.12
 -6 -8 3 1.6 0.13
 7 7 -4 9.1 0.35
 -7 -7 4 9.12 0.35
 -7 -7 4 9.54 0.35
 8 6 -5 1.6 0.14
 -8 -6 5 1.75 0.16
 -8 -6 5 1.61 0.15
 9 5 -6 1.08 0.16
 -9 -5 6 0.66 0.15
 -9 -5 6 0.7 0.16
 0 13 3 0.09 0.06
 0 -13 -3 0.02 0.07
 1 12 2 0.87 0.1
 -1 -12 -2 1.09 0.1
 -1 -12 -2 0.91 0.11
 2 11 1 3.31 0.16
 2 11 1 3.15 0.2
 2 11 1 3.37 0.25
 -2 -11 -1 3.24 0.13
 -2 -11 -1 3.24 0.14
 3 10 0 1.84 0.15
 3 10 0 1.59 0.11
 -3 -10 0 1.57 0.11
 -3 -10 0 1.71 0.09
 4 9 -1 3.59 0.2
 4 9 -1 3.52 0.17
 -4 -9 1 3.57 0.16
 -4 -9 1 3.55 0.19
 5 8 -2 3.09 0.18
 -5 -8 2 3.1 0.16
 -5 -8 2 3.03 0.15
 -5 -8 2 3.29 0.17
 6 7 -3 1.29 0.16
 -6 -7 3 1.23 0.15
 -6 -7 3 0.95 0.12
 -6 -7 3 0.98 0.12
 7 6 -4 7.14 0.29
 -7 -6 4 7.06 0.29
 -7 -6 4 6.99 0.3
 8 5 -5 -0.01 0.06
 -8 -5 5 -0.02 0.07
 -8 -5 5 -0.01 0.06
 9 4 -6 1.71 0.14
 -9 -4 6 1.8 0.18
 -9 -4 6 1.81 0.22
 0 12 3 2.44 0.27
 0 -12 -3 1.6 0.11
 1 11 2 0.17 0.09
 1 11 2 0.19 0.09
 1 11 2 0.14 0.05
 -1 -11 -2 0.16 0.06
 -1 -11 -2 0.18 0.05
 2 10 1 1.38 0.13
 2 10 1 1.69 0.15
 2 10 1 1.58 0.1
 -2 -10 -1 1.6 0.1
 -2 -10 -1 1.73 0.09
 3 9 0 2.04 0.16
 3 9 0 2.24 0.15
 3 9 0 1.42 0.1
 -3 -9 0 2.29 0.11
 -3 -9 0 1.56 0.12
 -3 -9 0 1.95 0.13
 -3 -9 0 2.25 0.1
 4 8 -1 0.08 0.06
 4 8 -1 0.06 0.04
 4 8 -1 0.04 0.06
 -4 -8 1 0.03 0.04
 -4 -8 1 0.13 0.06
 5 7 -2 0.26 0.08
 -5 -7 2 0.32 0.08
 -5 -7 2 0.28 0.07
 -5 -7 2 0.34 0.07
 6 6 -3 1.67 0.13
 -6 -6 3 2.24 0.13
 -6 -6 3 1.99 0.13
 -6 -6 3 1.9 0.13
 7 5 -4 1.13 0.14
 -7 -5 4 0.97 0.14
 -7 -5 4 0.87 0.13
 8 4 -5 0 0.05
 -8 -4 5 0.02 0.06
 -8 -4 5 0.06 0.08
 9 3 -6 0.02 0.06
 -9 -3 6 0 0.08
 -9 -3 6 -0.02 0.08
 -1 12 4 7.8 0.37
 1 -12 -4 7.71 0.27
 0 11 3 5.38 0.28
 0 -11 -3 5.4 0.19
 1 10 2 1.9 0.15
 1 10 2 1.96 0.1
 1 10 2 1.91 0.16
 -1 -10 -2 2.02 0.1
 -1 -10 -2 2 0.09
 2 9 1 0.62 0.12
 2 9 1 0.61 0.07
 2 9 1 0.65 0.11
 -2 -9 -1 0.68 0.1
 -2 -9 -1 0.82 0.09
 -2 -9 -1 0.62 0.06
 3 8 0 7.86 0.29
 3 8 0 8.29 0.26
 3 8 0 8.08 0.31
 -3 -8 0 8.15 0.24
 -3 -8 0 7.92 0.22
 -3 -8 0 7.92 0.26
 -3 -8 0 7.92 0.27
 4 7 -1 0.08 0.05
 4 7 -1 0.06 0.04
 -4 -7 1 0.03 0.04
 -4 -7 1 0.14 0.05
 -4 -7 1 0.11 0.04
 5 6 -2 6.31 0.24
 5 6 -2 6.48 0.22
 -5 -6 2 6.28 0.24
 -5 -6 2 6.24 0.23
 -5 -6 2 6.01 0.22
 6 5 -3 0.03 0.04
 -6 -5 3 0.09 0.06
 -6 -5 3 -0.01 0.04
 -6 -5 3 0.02 0.05
 7 4 -4 1.43 0.11
 -7 -4 4 1.8 0.19
 -7 -4 4 1.44 0.13
 8 3 -5 0.55 0.1
 -8 -3 5 0.59 0.13
 -8 -3 5 0.76 0.14
 9 2 -6 0.47 0.09
 -9 -2 6 0.48 0.14
 -2 12 5 -0.05 0.08
 2 -12 -5 0.14 0.07
 -1 11 4 0.04 0.07
 1 -11 -4 0.08 0.06
 0 10 3 0.15 0.08
 0 10 3 0.2 0.08
 0 -10 -3 0.25 0.06
 1 9 2 17.07 0.51
 1 9 2 17.21 0.44
 1 9 2 16.86 0.54
 -1 -9 -2 17.05 0.39
 -1 -9 -2 17.47 0.43
 2 8 1 5.27 0.24
 2 8 1 5.5 0.18
 2 8 1 5.46 0.23
 -2 -8 -1 5.82 0.18
 -2 -8 -1 5.39 0.16
 3 7 0 10.83 0.34
 3 7 0 10.38 0.3
 -3 -7 0 10.85 0.33
 -3 -7 0 10.69 0.29
 -3 -7 0 10.62 0.32
 4 6 -1 1.53 0.1
 4 6 -1 1.37 0.08
 4 6 -1 1.38 0.11
 -4 -6 1 1.34 0.08
 -4 -6 1 1.41 0.09
 -4 -6 1 1.41 0.09
 5 5 -2 7.21 0.22
 5 5 -2 7.29 0.27
 5 5 -2 6.75 0.24
 -5 -5 2 6.96 0.24
 -5 -5 2 6.82 0.25
 -5 -5 2 7.12 0.25
 6 4 -3 1.56 0.11
 -6 -4 3 1.72 0.13
 -6 -4 3 1.65 0.12
 -6 -4 3 1.6 0.12
 7 3 -4 0.46 0.08
 -7 -3 4 0.54 0.12
 -7 -3 4 0.6 0.13
 8 2 -5 1.03 0.09
 -8 -2 5 1.18 0.17
 9 1 -6 0.31 0.07
 -9 -1 6 0.28 0.11
 -2 11 5 1.1 0.19
 2 -11 -5 0.92 0.12
 -1 10 4 0.75 0.14
 1 -10 -4 1.01 0.11
 0 9 3 5.06 0.23
 0 9 3 5.39 0.25
 0 -9 -3 5.1 0.17
 0 -9 -3 5.11 0.15
 1 8 2 22.04 0.53
 1 8 2 21.98 0.63
 1 8 2 21.94 0.59
 -1 -8 -2 21.6 0.48
 -1 -8 -2 21.83 0.52
 -1 -8 -2 23.33 0.57
 2 7 1 0.87 0.06
 2 7 1 0.96 0.08
 -2 -7 -1 0.69 0.06
 -2 -7 -1 0.96 0.06
 3 6 0 66.96 1.56
 3 6 0 65.73 1.47
 3 6 0 66.23 1.46
 -3 -6 0 65.62 1.51
 -3 -6 0 65.23 1.47
 -3 -6 0 64.69 1.43
 4 5 -1 49.4 1.18
 4 5 -1 48.98 1.11
 4 5 -1 49.8 1.1
 -4 -5 1 47.49 1.15
 -4 -5 1 47.75 1.08
 -4 -5 1 46.93 1.11
 5 4 -2 0.53 0.08
 5 4 -2 0.06 0.04
 -5 -4 2 0.25 0.06
 -5 -4 2 0.07 0.04
 -6 -3 3 1.74 0.12
 -6 -3 3 1.51 0.12
 7 2 -4 1.52 0.1
 -7 -2 4 1.53 0.14
 8 1 -5 2.03 0.12
 -8 -1 5 1.78 0.16
 9 0 -6 0.37 0.07
 -9 0 6 0.33 0.11
 -3 11 6 3.42 0.24
 -3 11 6 3.49 0.25
 3 -11 -6 3.46 0.17
 -2 10 5 0.43 0.12
 2 -10 -5 0.47 0.09
 -1 9 4 5.73 0.25
 -1 9 4 5.42 0.26
 1 -9 -4 5.13 0.19
 0 8 3 2.09 0.14
 0 8 3 2.47 0.14
 0 -8 -3 2.46 0.11
 0 -8 -3 2.34 0.1
 0 -8 -3 2.44 0.09
 0 -8 -3 2.17 0.12
 1 7 2 9.96 0.31
 1 7 2 10.19 0.34
 -1 -7 -2 9.99 0.24
 -1 -7 -2 9.82 0.26
 -1 -7 -2 10.12 0.3
 -1 -7 -2 10.49 0.29
 2 6 1 2 0.09
 2 6 1 1.88 0.11
 2 6 1 2.14 0.11
 -2 -6 -1 2.19 0.09
 -2 -6 -1 2.06 0.08
 3 5 0 121.34 2.74
 3 5 0 121.18 2.63
 3 5 0 124.32 2.59
 -3 -5 0 120.77 2.72
 -3 -5 0 122.74 2.55
 -3 -5 0 112.62 2.6
 4 4 -1 149.45 3.32
 4 4 -1 149.09 3.3
 4 4 -1 144.85 3.16
 -4 -4 1 150.09 3.13
 -4 -4 1 144.72 3.31
 -4 -4 1 146.32 3.23
 5 3 -2 0.49 0.03
 5 3 -2 0.52 0.07
 -5 -3 2 0.48 0.08
 -5 -3 2 0.51 0.08
 -5 -3 2 0.46 0.08
 -6 -2 3 23.98 0.65
 7 1 -4 16.99 0.44
 -7 -1 4 16.48 0.52
 8 0 -5 4.64 0.17
 -8 0 5 4.7 0.26
 9 -1 -6 0.92 0.09
 -9 1 6 0.94 0.18
 -3 10 6 0.04 0.08
 -3 10 6 0 0.07
 3 -10 -6 0.07 0.06
 -2 9 5 0.1 0.07
 -2 9 5 0.07 0.08
 2 -9 -5 0.08 0.06
 -1 8 4 8.02 0.31
 -1 8 4 8.1 0.29
 1 -8 -4 7.93 0.24
 0 7 3 16.88 0.46
 0 7 3 16.67 0.49
 0 -7 -3 16.34 0.4
 0 -7 -3 16.29 0.43
 0 -7 -3 16.93 0.43
 0 -7 -3 16.6 0.37
 1 6 2 0.64 0.08
 1 6 2 0.61 0.09
 -1 -6 -2 0.58 0.07
 -1 -6 -2 0.46 0.04
 -1 -6 -2 0.52 0.04
 -1 -6 -2 0.52 0.05
 2 5 1 6.11 0.2
 2 5 1 5.88 0.21
 2 5 1 5.87 0.17
 -2 -5 -1 5.65 0.17
 -2 -5 -1 5.5 0.18
 -2 -5 -1 5.94 0.19
 3 4 0 19.93 0.53
 3 4 0 21.75 0.49
 3 4 0 21.51 0.5
 -3 -4 0 17.37 0.5
 -3 -4 0 21.98 0.49
 4 3 -1 2.15 0.07
 4 3 -1 2.3 0.1
 -4 -3 1 2.22 0.11
 -4 -3 1 2.07 0.11
 -4 -3 1 2.09 0.1
 -4 -3 1 2.22 0.1
 5 2 -2 18.9 0.49
 -5 -2 2 20.84 0.54
 -5 -2 2 20.98 0.53
 6 1 -3 0.67 0.06
 -6 -1 3 0.72 0.11
 7 0 -4 0.77 0.09
 -7 0 4 0.67 0.13
 8 -1 -5 0.96 0.07
 -8 1 5 0.97 0.16
 -9 2 6 0.16 0.1
 -4 10 7 2.54 0.29
 -4 10 7 2.45 0.27
 4 -10 -7 1.73 0.13
 -3 9 6 0.82 0.15
 -3 9 6 1.09 0.17
 3 -9 -6 1.02 0.12
 -2 8 5 0.6 0.12
 -2 8 5 0.38 0.1
 -2 8 5 0.57 0.11
 2 -8 -5 0.48 0.08
 -1 7 4 0.09 0.05
 -1 7 4 0.08 0.05
 1 -7 -4 0.14 0.04
 1 -7 -4 0.19 0.05
 1 -7 -4 0.11 0.04
 0 6 3 56.58 1.26
 0 -6 -3 56.83 1.12
 0 -6 -3 54.99 1.24
 0 -6 -3 53.52 1.2
 0 -6 -3 56.7 1.28
 1 5 2 80.63 1.83
 1 5 2 78.83 1.72
 -1 -5 -2 81.16 1.57
 -1 -5 -2 79.66 1.68
 -1 -5 -2 79.02 1.78
 -1 -5 -2 75.39 1.72
 -1 -5 -2 80.39 1.71
 2 4 1 92.79 2.02
 2 4 1 93.9 2.04
 2 4 1 93.94 2.14
 -2 -4 -1 93.84 2.15
 -2 -4 -1 93.57 2.05
 -2 -4 -1 94.5 2.02
 -2 -4 -1 98.74 2.06
 4 2 -1 85.76 1.9
 -4 -2 1 89.32 1.96
 -4 -2 1 90.43 1.95
 -4 -2 1 91.8 1.94
 5 1 -2 0.97 0.06
 5 1 -2 0.95 0.06
 -5 -1 2 0.9 0.08
 -5 -1 2 0.91 0.06
 -5 -1 2 0.85 0.08
 6 0 -3 81.71 1.77
 6 0 -3 84.38 1.78
 -6 0 3 82.04 1.89
 7 -1 -4 37.22 0.82
 -7 1 4 35.3 0.95
 8 -2 -5 2.12 0.08
 -8 2 5 2.07 0.18
 -4 9 7 0.04 0.08
 -4 9 7 0.09 0.09
 4 -9 -7 0 0.05
 -3 8 6 4.34 0.24
 -3 8 6 4.17 0.24
 3 -8 -6 4.1 0.18
 -2 7 5 14.39 0.45
 -2 7 5 14.89 0.44
 -2 7 5 13.32 0.46
 2 -7 -5 14.95 0.39
 -1 6 4 7.71 0.26
 -1 6 4 7.69 0.28
 1 -6 -4 8.28 0.25
 1 -6 -4 8.28 0.25
 1 -6 -4 8.27 0.23
 0 5 3 5.18 0.18
 0 5 3 5.27 0.19
 0 -5 -3 5.47 0.14
 0 -5 -3 5.46 0.16
 0 -5 -3 5.15 0.15
 0 -5 -3 5.15 0.17
 1 4 2 1.38 0.07
 1 4 2 1.37 0.08
 1 4 2 1.52 0.05
 -1 -4 -2 1.43 0.05
 -1 -4 -2 1.47 0.06
 -1 -4 -2 1.42 0.07
 -1 -4 -2 1.46 0.06
 2 3 1 247.24 5.33
 2 3 1 245.14 5.99
 -2 -3 -1 244.43 5.4
 -2 -3 -1 265.78 6.69
 -2 -3 -1 257.85 5.8
 -3 -2 0 46.58 1.02
 4 1 -1 9.28 0.23
 4 1 -1 9.1 0.23
 -4 -1 1 9.16 0.27
 -4 -1 1 9.25 0.26
 -4 -1 1 9.57 0.24
 5 0 -2 1.13 0.06
 5 0 -2 1.17 0.06
 -5 0 2 1.08 0.08
 -5 0 2 1.01 0.09
 -5 0 2 1.09 0.07
 6 -1 -3 11.03 0.28
 -6 1 3 11.1 0.37
 7 -2 -4 4.41 0.14
 -7 2 4 4.27 0.23
 -8 3 5 9.88 0.41
 -5 9 8 0.23 0.13
 5 -9 -8 0.34 0.09
 -4 8 7 0.19 0.1
 -4 8 7 0.27 0.1
 4 -8 -7 0.28 0.08
 -3 7 6 0.19 0.08
 -3 7 6 0.3 0.1
 -3 7 6 0.18 0.08
 3 -7 -6 0.19 0.06
 -2 6 5 0.32 0.08
 -2 6 5 0.34 0.08
 -2 6 5 0.2 0.06
 2 -6 -5 0.27 0.05
 2 -6 -5 0.26 0.06
 2 -6 -5 0.32 0.07
 -1 5 4 1.11 0.08
 1 -5 -4 1.12 0.06
 1 -5 -4 1.19 0.08
 1 -5 -4 1.16 0.07
 0 4 3 3.34 0.13
 0 4 3 3.2 0.12
 0 -4 -3 3.13 0.11
 0 -4 -3 3.32 0.11
 0 -4 -3 3.11 0.09
 0 -4 -3 3.31 0.1
 0 -4 -3 3.17 0.11
 1 3 2 9.99 0.25
 1 3 2 9.4 0.26
 1 3 2 9.47 0.22
 -1 -3 -2 9.56 0.24
 -1 -3 -2 9.83 0.24
 -1 -3 -2 9.68 0.21
 -1 -3 -2 9.9 0.24
 -1 -3 -2 9.81 0.23
 2 2 1 0.02 0.01
 -2 -2 -1 0.07 0.02
 3 1 0 0.78 0.03
 3 1 0 0.8 0.03
 -3 -1 0 0.82 0.04
 -3 -1 0 0.75 0.04
 4 0 -1 0.56 0.03
 4 0 -1 0.53 0.03
 -4 0 1 0.74 0.08
 -4 0 1 0.52 0.03
 -4 0 1 0.53 0.05
 5 -1 -2 1.12 0.05
 -5 1 2 1.18 0.07
 -5 1 2 1.17 0.08
 -5 1 2 1.04 0.09
 6 -2 -3 0.18 0.03
 6 -2 -3 0.14 0.03
 -6 2 3 0.12 0.06
 -7 3 4 0.03 0.07
 -8 4 5 0.96 0.17
 -5 8 8 0.42 0.14
 5 -8 -8 0.43 0.09
 -4 7 7 0.03 0.07
 4 -7 -7 0.11 0.06
 -3 6 6 4.39 0.22
 -3 6 6 4.26 0.21
 -3 6 6 4.19 0.22
 3 -6 -6 4.46 0.17
 -2 5 5 7.13 0.26
 -2 5 5 6.91 0.25
 -2 5 5 6.79 0.26
 2 -5 -5 6.89 0.21
 2 -5 -5 6.84 0.23
 2 -5 -5 6.94 0.24
 -1 4 4 17.8 0.5
 -1 4 4 18.34 0.48
 -1 4 4 18.62 0.47
 1 -4 -4 18.68 0.47
 1 -4 -4 18.63 0.44
 1 -4 -4 18.78 0.47
 0 3 3 29.71 0.71
 0 3 3 30.07 0.69
 0 3 3 30.2 0.6
 0 3 3 30.53 0.68
 0 -3 -3 28.71 0.64
 0 -3 -3 29 0.67
 0 -3 -3 29.66 0.67
 0 -3 -3 29.85 0.68
 0 -3 -3 30.39 0.6
 1 2 2 352.66 7.58
 1 2 2 344.78 7.64
 -1 -2 -2 337.59 8.03
 -1 -2 -2 359.5 7.7
 -1 -2 -2 337.14 7.9
 -1 -2 -2 341.6 8.28
 -2 -1 -1 210.49 5.03
 -2 -1 -1 212.99 5.08
 -3 0 0 3.31 0.1
 -3 0 0 3.28 0.11
 -3 0 0 3.4 0.1
 -4 1 1 0.26 0.04
 -4 1 1 0.16 0.02
 -4 1 1 0.12 0.03
 -4 1 1 0.21 0.05
 5 -2 -2 0.52 0.03
 5 -2 -2 0.47 0.03
 -5 2 2 0.63 0.08
 -5 2 2 0.49 0.04
 -5 2 2 0.63 0.09
 -6 3 3 1.34 0.12
 -7 4 4 4.27 0.24
 -8 5 5 0.64 0.15
 -5 7 8 0.11 0.09
 5 -7 -8 0.17 0.07
 -4 6 7 2.82 0.19
 -4 6 7 2.8 0.19
 4 -6 -7 2.53 0.14
 -3 5 6 0 0.04
 -3 5 6 0.01 0.05
 3 -5 -6 -0.01 0.03
 3 -5 -6 -0.03 0.03
 3 -5 -6 -0.04 0.03
 -2 4 5 1.48 0.1
 -2 4 5 1.44 0.1
 -2 4 5 1.53 0.1
 2 -4 -5 1.54 0.1
 2 -4 -5 1.63 0.09
 2 -4 -5 1.55 0.08
 2 -4 -5 1.46 0.08
 -1 3 4 1.62 0.09
 -1 3 4 1.47 0.09
 -1 3 4 1.62 0.09
 1 -3 -4 1.5 0.08
 1 -3 -4 1.49 0.08
 1 -3 -4 1.81 0.08
 1 -3 -4 1.63 0.07
 0 2 3 10.06 0.21
 0 2 3 9.98 0.25
 0 2 3 9.72 0.26
 0 -2 -3 9.93 0.25
 0 -2 -3 9.92 0.25
 0 -2 -3 9.6 0.21
 0 -2 -3 9.48 0.24
 0 -2 -3 10.41 0.23
 -1 -1 -2 20.95 0.46
 -1 -1 -2 20.09 0.44
 -1 -1 -2 20.12 0.45
 -2 0 -1 18.7 0.4
 -3 1 0 6.24 0.17
 -3 1 0 6.09 0.16
 -3 1 0 6.19 0.17
 -4 2 1 0.28 0.05
 -4 2 1 0.31 0.06
 -4 2 1 0.45 0.05
 -5 3 2 3.78 0.17
 -5 3 2 3.7 0.17
 -6 4 3 4.57 0.23
 -6 4 3 4.55 0.22
 -7 5 4 4 0.24
 -6 7 9 0 0.09
 6 -7 -9 0.27 0.09
 -5 6 8 12.81 0.5
 5 -6 -8 12.89 0.39
 -4 5 7 0.34 0.09
 -4 5 7 0.28 0.09
 4 -5 -7 0.31 0.07
 -3 4 6 4.06 0.19
 -3 4 6 3.76 0.2
 3 -4 -6 3.82 0.18
 3 -4 -6 4.01 0.15
 3 -4 -6 4.05 0.16
 3 -4 -6 4.3 0.18
 -2 3 5 132.98 2.75
 -2 3 5 111.62 2.78
 2 -3 -5 130.55 2.79
 2 -3 -5 132.33 2.87
 2 -3 -5 128.88 2.75
 -1 2 4 70.13 1.54
 -1 2 4 71.3 1.51
 1 -2 -4 67.53 1.51
 1 -2 -4 69.51 1.49
 1 -2 -4 70.24 1.57
 1 -2 -4 66.43 1.52
 0 1 3 102.88 2.2
 0 1 3 100.61 2.18
 0 1 3 100.34 2.19
 0 1 3 103.89 2
 0 -1 -3 102.17 2.28
 0 -1 -3 102.92 2.24
 0 -1 -3 98.43 2.22
 0 -1 -3 102.78 2.22
 -1 0 -2 66.67 1.46
 -1 0 -2 67.92 1.44
 -2 1 -1 6.15 0.15
 -3 2 0 1.16 0.06
 -3 2 0 1.17 0.05
 -3 2 0 1.11 0.05
 -4 3 1 7.48 0.24
 -4 3 1 7.59 0.22
 -4 3 1 7.54 0.22
 -5 4 2 0.07 0.05
 -5 4 2 0.04 0.05
 -6 5 3 1.33 0.16
 -6 5 3 1.6 0.18
 -7 6 4 2.16 0.19
 -6 6 9 2.88 0.32
 6 -6 -9 1.92 0.14
 -5 5 8 4.02 0.25
 5 -5 -8 3.65 0.18
 -4 4 7 31.49 0.85
 -4 4 7 30.89 0.81
 4 -4 -7 29.32 0.73
 -3 3 6 4.75 0.22
 -3 3 6 4.9 0.21
 3 -3 -6 5.35 0.2
 3 -3 -6 5 0.18
 3 -3 -6 4.99 0.21
 3 -3 -6 4.79 0.17
 -2 2 5 49.82 1.15
 -2 2 5 50.22 1.18
 2 -2 -5 50.25 1.16
 2 -2 -5 50.24 1.11
 2 -2 -5 52.18 1.14
 2 -2 -5 49.34 1.18
 -1 1 4 143.37 3.08
 -1 1 4 139.33 3.07
 1 -1 -4 144.06 3.87
 1 -1 -4 142.27 3.14
 1 -1 -4 142.82 3.24
 1 -1 -4 144.27 3.08
 0 0 3 538.18 12.25
 0 0 -3 536.29 12.59
 0 0 -3 523.13 11.94
 0 0 -3 553.55 12.92
 0 0 -3 518.03 12.81
 -1 1 -2 1000 20.1
 -1 1 -2 797.78 20.5
 -1 1 -2 977.36 20.74
 -3 3 0 31.22 0.72
 -3 3 0 31.61 0.75
 -3 3 0 31.01 0.7
 -4 4 1 4.75 0.16
 -4 4 1 4.64 0.18
 -5 5 2 2.52 0.15
 -5 5 2 2.34 0.15
 -6 6 3 1.2 0.16
 -6 6 3 0.99 0.15
 -7 7 4 2.99 0.22
 -7 7 4 2.95 0.22
 -6 5 9 2.42 0.28
 6 -5 -9 1.93 0.14
 -5 4 8 0.8 0.15
 -5 4 8 0.93 0.16
 5 -4 -8 0.94 0.12
 -4 3 7 0.08 0.07
 -4 3 7 0.03 0.05
 4 -3 -7 0.08 0.04
 4 -3 -7 0.02 0.05
 4 -3 -7 0.08 0.05
 -3 2 6 1.07 0.13
 -3 2 6 0.86 0.11
 3 -2 -6 0.94 0.1
 3 -2 -6 0.87 0.11
 3 -2 -6 0.69 0.06
 3 -2 -6 0.71 0.06
 -2 1 5 16.5 0.43
 -2 1 5 16.3 0.45
 2 -1 -5 16.34 0.43
 2 -1 -5 15.97 0.4
 2 -1 -5 16.31 0.43
 2 -1 -5 15.9 0.41
 -1 0 4 0.51 0.06
 -1 0 4 0.57 0.07
 1 0 -4 0.47 0.06
 1 0 -4 0.34 0.03
 1 0 -4 0.43 0.05
 1 0 -4 0.35 0.03
 0 -1 3 360.1 8.58
 0 1 -3 367.49 8.86
 0 1 -3 371.6 8.54
 0 1 -3 320.52 7.96
 -1 2 -2 291.87 6.98
 -1 2 -2 297.55 6.96
 -1 2 -2 294.31 7.15
 -2 3 -1 10.68 0.26
 -2 3 -1 10.85 0.29
 -2 3 -1 11.02 0.27
 -3 4 0 7.73 0.22
 -3 4 0 8.23 0.22
 -4 5 1 3.64 0.17
 -5 6 2 0.42 0.09
 -5 6 2 0.33 0.08
 -6 7 3 6.02 0.3
 -6 7 3 6.17 0.29
 -6 4 9 0.17 0.11
 6 -4 -9 0.31 0.09
 -5 3 8 19.94 0.61
 -5 3 8 19.93 0.64
 5 -3 -8 19.6 0.53
 -4 2 7 5.38 0.25
 -4 2 7 4.7 0.22
 4 -2 -7 4.83 0.21
 4 -2 -7 4.78 0.18
 4 -2 -7 4.7 0.19
 -3 1 6 0.04 0.04
 3 -1 -6 0.16 0.06
 3 -1 -6 0.01 0.03
 3 -1 -6 0.07 0.04
 3 -1 -6 0.06 0.03
 -2 0 5 0.7 0.06
 -2 0 5 0.85 0.1
 2 0 -5 0.66 0.06
 2 0 -5 0.62 0.05
 2 0 -5 0.65 0.05
 -1 -1 4 2.74 0.1
 -1 -1 4 2.58 0.11
 -1 -1 4 2.67 0.11
 1 1 -4 2.11 0.1
 1 1 -4 2.77 0.11
 1 1 -4 2.79 0.1
 1 1 -4 2.68 0.1
 0 -2 3 50.81 1.11
 0 2 -3 51.18 1.12
 1 -3 2 124.41 2.56
 -1 3 -2 120.63 2.62
 -1 3 -2 120.76 2.73
 -2 4 -1 1.66 0.07
 -2 4 -1 1.52 0.07
 -3 5 0 23.64 0.57
 -4 6 1 4.02 0.19
 -5 7 2 1.48 0.13
 -5 7 2 1.56 0.14
 -6 8 3 1.39 0.19
 -6 8 3 1.61 0.21
 7 -4 -10 8.34 0.32
 -6 3 9 4.94 0.29
 6 -3 -9 4.33 0.21
 -5 2 8 72.11 1.76
 -5 2 8 73.53 1.71
 5 -2 -8 71.08 1.63
 -4 1 7 17.31 0.53
 -4 1 7 17.75 0.51
 4 -1 -7 17.54 0.47
 4 -1 -7 17.29 0.46
 -3 0 6 8.35 0.28
 3 0 -6 8.07 0.26
 3 0 -6 8.41 0.25
 -2 -1 5 2.13 0.11
 -2 -1 5 1.99 0.11
 -2 -1 5 2.07 0.1
 2 1 -5 1.93 0.1
 2 1 -5 2.09 0.1
 -1 -2 4 27.71 0.65
 -1 -2 4 27.13 0.64
 -1 -2 4 27.19 0.61
 1 2 -4 26.82 0.66
 1 2 -4 27.83 0.63
 1 2 -4 27.08 0.63
 0 -3 3 32.73 0.72
 0 -3 3 33.24 0.75
 0 -3 3 33 0.66
 0 3 -3 34.74 0.77
 0 3 -3 33.55 0.8
 1 -4 2 51.11 1.04
 1 -4 2 48.36 1.03
 -1 4 -2 48.38 1.08
 -1 4 -2 47.02 1.14
 2 -5 1 0.06 0.02
 -2 5 -1 0.05 0.03
 -2 5 -1 0.01 0.03
 -3 6 0 10.45 0.34
 -4 7 1 2.46 0.16
 -5 8 2 0.39 0.11
 -5 8 2 0.36 0.1
 7 -3 -10 0.07 0.08
 -6 2 9 4.63 0.28
 -6 2 9 4.28 0.25
 6 -2 -9 4.65 0.21
 -5 1 8 4.99 0.24
 -5 1 8 4.65 0.26
 5 -1 -8 5.05 0.21
 -4 0 7 5.86 0.24
 -4 0 7 5.88 0.26
 4 0 -7 6.28 0.22
 4 0 -7 6.12 0.22
 -3 -1 6 15.47 0.44
 -3 -1 6 16.03 0.46
 3 1 -6 16.18 0.42
 3 1 -6 15.79 0.45
 3 1 -6 15.96 0.45
 3 1 -6 15.8 0.43
 -2 -2 5 2.89 0.13
 -2 -2 5 3.12 0.14
 -2 -2 5 3.07 0.12
 2 2 -5 3.04 0.12
 2 2 -5 2.95 0.12
 2 2 -5 2.9 0.13
 2 2 -5 2.9 0.13
 -1 -3 4 0.98 0.06
 -1 -3 4 0.65 0.04
 1 3 -4 0.71 0.06
 1 3 -4 0.85 0.06
 1 3 -4 0.63 0.04
 0 -4 3 2.58 0.07
 0 -4 3 2.53 0.08
 0 -4 3 2.42 0.1
 0 4 -3 2.51 0.12
 0 4 -3 2.53 0.11
 1 -5 2 4.96 0.14
 1 -5 2 4.68 0.12
 -1 5 -2 4.58 0.18
 -1 5 -2 4.64 0.16
 2 -6 1 0.5 0.03
 -2 6 -1 0.65 0.09
 3 -7 0 0.25 0.03
 3 -7 0 0.26 0.03
 -3 7 0 0.18 0.07
 -4 8 1 0.1 0.07
 -5 9 2 0.29 0.1
 -5 9 2 0.18 0.09
 7 -2 -10 7.72 0.31
 -6 1 9 8.46 0.35
 -6 1 9 8.41 0.38
 6 -1 -9 7.9 0.3
 -5 0 8 21.32 0.65
 -5 0 8 21.76 0.62
 5 0 -8 21.44 0.58
 -4 -1 7 12.25 0.41
 -4 -1 7 11.91 0.39
 4 1 -7 13.28 0.38
 4 1 -7 12.73 0.4
 4 1 -7 12.46 0.4
 4 1 -7 12.4 0.37
 -3 -2 6 14.05 0.42
 -3 -2 6 14.27 0.39
 -3 -2 6 13.92 0.42
 3 2 -6 14.03 0.39
 3 2 -6 14.28 0.4
 3 2 -6 14.05 0.41
 3 2 -6 13.95 0.41
 -2 -3 5 0.73 0.09
 -2 -3 5 0.28 0.05
 -2 -3 5 0.37 0.07
 2 3 -5 0.47 0.07
 2 3 -5 0.27 0.06
 2 3 -5 0.39 0.06
 -1 -4 4 7.4 0.2
 -1 -4 4 7.89 0.23
 1 4 -4 7.19 0.21
 1 4 -4 7.31 0.25
 1 4 -4 7.7 0.23
 0 -5 3 43.33 0.99
 0 -5 3 42.38 0.86
 0 -5 3 44.3 0.94
 0 5 -3 45.33 1
 0 5 -3 42.42 1.06
 1 -6 2 7.11 0.19
 1 -6 2 6.93 0.18
 -1 6 -2 6.87 0.26
 2 -7 1 0.92 0.05
 -2 7 -1 0.95 0.12
 -3 8 0 1.4 0.17
 -4 9 1 1.47 0.19
 7 -1 -10 4.93 0.24
 -6 0 9 1.89 0.22
 6 0 -9 1.66 0.18
 -5 -1 8 7.86 0.31
 -5 -1 8 7.23 0.32
 5 1 -8 7.77 0.28
 5 1 -8 8.15 0.28
 -4 -2 7 2.05 0.14
 -4 -2 7 1.98 0.13
 -4 -2 7 1.96 0.14
 4 2 -7 1.95 0.12
 4 2 -7 1.89 0.13
 4 2 -7 1.99 0.12
 -3 -3 6 2.9 0.14
 -3 -3 6 3.22 0.16
 -3 -3 6 3.14 0.16
 3 3 -6 3.22 0.16
 3 3 -6 3.49 0.15
 3 3 -6 3.33 0.15
 -2 -4 5 2.6 0.12
 -2 -4 5 2.36 0.1
 -2 -4 5 2.41 0.12
 2 4 -5 2.54 0.14
 2 4 -5 2.48 0.13
 2 4 -5 2.71 0.12
 -1 -5 4 19.08 0.48
 -1 -5 4 18.16 0.43
 1 5 -4 17.53 0.51
 1 5 -4 19.05 0.49
 1 5 -4 18.18 0.45
 0 -6 3 3.48 0.09
 0 6 -3 3.48 0.17
 1 -7 2 12.1 0.29
 -1 7 -2 12 0.4
 2 -8 1 1.47 0.07
 -2 8 -1 1.32 0.12
 -3 9 0 13.36 0.47
 -4 10 1 6.84 0.33
 -7 0 10 -0.04 0.09
 7 0 -10 0.16 0.09
 -6 -1 9 31.32 0.86
 6 1 -9 31.56 0.82
 -5 -2 8 26.12 0.7
 5 2 -8 25.4 0.69
 5 2 -8 26.02 0.69
 -4 -3 7 2.27 0.14
 -4 -3 7 2.23 0.15
 4 3 -7 2.17 0.14
 4 3 -7 2.22 0.14
 4 3 -7 2.32 0.15
 -3 -4 6 15.26 0.41
 -3 -4 6 15.54 0.45
 3 4 -6 15.58 0.47
 3 4 -6 15.45 0.44
 3 4 -6 15.63 0.44
 -2 -5 5 7.71 0.23
 2 5 -5 7.97 0.29
 2 5 -5 7.74 0.25
 2 5 -5 7.88 0.27
 -1 -6 4 2.66 0.09
 1 6 -4 2.59 0.15
 1 6 -4 2.65 0.11
 1 6 -4 2.65 0.15
 0 -7 3 0.76 0.05
 0 -7 3 0.93 0.04
 0 7 -3 1.14 0.14
 1 -8 2 8.59 0.22
 -1 8 -2 8.81 0.34
 2 -9 1 21.54 0.49
 -2 9 -1 21.15 0.66
 -3 10 0 6.55 0.32
 -7 -1 10 1.64 0.22
 7 1 -10 1.25 0.17
 -6 -2 9 1.68 0.19
 6 2 -9 1.46 0.17
 -5 -3 8 7.75 0.3
 5 3 -8 7.98 0.3
 5 3 -8 7.79 0.3
 -4 -4 7 0.02 0.05
 4 4 -7 0.01 0.05
 4 4 -7 0.01 0.05
 4 4 -7 -0.01 0.04
 -3 -5 6 8.43 0.26
 3 5 -6 8.69 0.29
 3 5 -6 8.5 0.3
 3 5 -6 8.68 0.32
 -2 -6 5 5.22 0.17
 2 6 -5 4.91 0.19
 2 6 -5 5.16 0.22
 2 6 -5 5.15 0.23
 -1 -7 4 11.09 0.28
 -1 -7 4 10.57 0.25
 1 7 -4 10.67 0.38
 1 7 -4 10.25 0.3
 0 -8 3 0.07 0.03
 0 8 -3 0.25 0.09
 0 8 -3 0.11 0.04
 1 -9 2 5.61 0.17
 -1 9 -2 5.45 0.27
 2 -10 1 7.42 0.19
 -2 10 -1 7.17 0.34
 -3 11 0 3.16 0.23
 -7 -2 10 1.52 0.22
 7 2 -10 1.72 0.21
 -6 -3 9 -0.01 0.07
 6 3 -9 0 0.07
 -5 -4 8 0.05 0.06
 5 4 -8 0.03 0.06
 5 4 -8 0 0.05
 -4 -5 7 1.26 0.1
 4 5 -7 1.78 0.2
 4 5 -7 1.38 0.16
 4 5 -7 1.18 0.11
 -3 -6 6 1.66 0.1
 3 6 -6 1.57 0.13
 3 6 -6 1.48 0.11
 3 6 -6 1.58 0.14
 -2 -7 5 0.55 0.06
 -2 -7 5 0.63 0.08
 2 7 -5 0.45 0.11
 2 7 -5 0.46 0.08
 -1 -8 4 0.48 0.04
 -1 -8 4 0.64 0.07
 1 8 -4 0.73 0.13
 1 8 -4 0.52 0.07
 0 -9 3 0.1 0.04
 0 9 -3 0.08 0.04
 0 9 -3 0.22 0.09
 1 -10 2 0 0.04
 -1 10 -2 0.05 0.08
 -2 11 -1 2.15 0.25
 -7 -3 10 0.17 0.11
 7 3 -10 0.25 0.11
 -6 -4 9 0.05 0.07
 6 4 -9 0.2 0.1
 -5 -5 8 1.19 0.15
 5 5 -8 1.14 0.15
 5 5 -8 0.97 0.15
 -4 -6 7 0.09 0.06
 4 6 -7 0.14 0.08
 4 6 -7 0.16 0.08
 4 6 -7 0.13 0.06
 -3 -7 6 0.7 0.09
 3 7 -6 0.86 0.15
 3 7 -6 0.81 0.11
 -2 -8 5 0.08 0.04
 -2 -8 5 0.17 0.05
 2 8 -5 0.16 0.08
 2 8 -5 0.11 0.05
 -1 -9 4 1.03 0.05
 -1 -9 4 0.95 0.07
 1 9 -4 1.04 0.09
 1 9 -4 1.56 0.19
 0 -10 3 0.68 0.07
 0 10 -3 0.77 0.15
 0 10 -3 0.55 0.08
 1 -11 2 6.53 0.19
 -1 11 -2 6.85 0.35
 -6 -5 9 0.21 0.09
 6 5 -9 0.22 0.1
 -5 -6 8 0 0.06
 5 6 -8 0.08 0.08
 -4 -7 7 2.13 0.13
 4 7 -7 2.25 0.16
 4 7 -7 2.07 0.18
 -3 -8 6 0.67 0.1
 -3 -8 6 0.88 0.08
 3 8 -6 0.77 0.11
 3 8 -6 0.59 0.14
 -2 -9 5 0.26 0.05
 -2 -9 5 0.17 0.06
 -2 -9 5 0.25 0.06
 2 9 -5 0.28 0.1
 2 9 -5 0.14 0.06
 -1 -10 4 0.34 0.04
 -1 -10 4 0.27 0.06
 1 10 -4 0.39 0.08
 1 10 -4 0.47 0.13
 0 -11 3 5.93 0.18
 0 11 -3 6.23 0.33
 0 11 -3 5.68 0.23
 -6 -6 9 0.65 0.13
 6 6 -9 0.56 0.14
 -5 -7 8 1.24 0.15
 5 7 -8 1.85 0.23
 -4 -8 7 1.23 0.11
 4 8 -7 1.45 0.17
 -3 -9 6 1.09 0.09
 -3 -9 6 1.09 0.07
 3 9 -6 1.33 0.2
 3 9 -6 1.49 0.16
 -2 -10 5 3.11 0.11
 -2 -10 5 3.26 0.14
 2 10 -5 3.36 0.24
 2 10 -5 3.1 0.18
 -1 -11 4 0.21 0.06
 1 11 -4 0.17 0.07
 1 11 -4 0.22 0.11
 -4 -9 7 0.07 0.05
 -4 -9 7 0.26 0.09
 4 9 -7 0.02 0.07
 -3 -10 6 2.57 0.14
 -3 -10 6 2.85 0.11
 3 10 -6 2.82 0.18
 5 12 -1 0.42 0.14
 -5 -12 1 0.66 0.1
 -5 -12 1 0.4 0.1
 6 11 -2 0.23 0.11
 -6 -11 2 0.52 0.11
 7 10 -3 1.44 0.2
 3 13 1 4.31 0.27
 -3 -13 -1 4.28 0.19
 -3 -13 -1 4.21 0.16
 4 12 0 0.56 0.14
 -4 -12 0 0.37 0.09
 -4 -12 0 0.34 0.07
 5 11 -1 1.54 0.2
 -5 -11 1 1.18 0.14
 -5 -11 1 1.07 0.11
 6 10 -2 0.88 0.16
 -6 -10 2 0.83 0.12
 7 9 -3 0.61 0.13
 8 8 -4 0.27 0.1
 2 13 2 3.7 0.24
 -2 -13 -2 3.68 0.15
 -2 -13 -2 3.93 0.17
 3 12 1 2.35 0.19
 -3 -12 -1 2.1 0.13
 -3 -12 -1 2.1 0.11
 4 11 0 1.18 0.17
 -4 -11 0 0.84 0.11
 -4 -11 0 0.81 0.09
 5 10 -1 0.61 0.13
 -5 -10 1 0.49 0.09
 6 9 -2 -0.01 0.07
 -6 -9 2 0.03 0.06
 -6 -9 2 0.03 0.07
 7 8 -3 1.06 0.16
 -7 -8 3 1.32 0.16
 -7 -8 3 0.87 0.14
 8 7 -4 0.44 0.11
 -8 -7 4 0.68 0.14
 -8 -7 4 0.37 0.11
 9 6 -5 0.45 0.11
 -9 -6 5 0.29 0.11
 -9 -6 5 0.26 0.11
 -1 -13 -3 0.25 0.08
 2 12 2 1.83 0.17
 -2 -12 -2 1.92 0.1
 -2 -12 -2 2 0.12
 3 11 1 1.26 0.18
 -3 -11 -1 1.4 0.14
 -3 -11 -1 0.9 0.07
 4 10 0 13.6 0.45
 -4 -10 0 13.32 0.38
 -4 -10 0 12.93 0.34
 5 9 -1 4.02 0.21
 -5 -9 1 4.03 0.17
 -5 -9 1 4.12 0.19
 -5 -9 1 3.97 0.2
 6 8 -2 0.1 0.07
 -6 -8 2 0.17 0.06
 -6 -8 2 0.39 0.1
 -6 -8 2 0.24 0.08
 7 7 -3 0.13 0.08
 -7 -7 3 0.08 0.06
 -7 -7 3 0.19 0.08
 8 6 -4 1.23 0.16
 -8 -6 4 1.07 0.16
 -8 -6 4 1.17 0.16
 9 5 -5 -0.03 0.06
 -9 -5 5 -0.04 0.07
 -9 -5 5 0.04 0.08
 0 -13 -4 1.11 0.13
 1 12 3 2.32 0.19
 1 12 3 2.42 0.13
 -1 -12 -3 2.46 0.13
 -1 -12 -3 2.44 0.11
 2 11 2 12 0.43
 2 11 2 12.53 0.37
 -2 -11 -2 12.59 0.35
 -2 -11 -2 12.58 0.32
 3 10 1 8.3 0.27
 3 10 1 8.43 0.33
 -3 -10 -1 8.28 0.23
 -3 -10 -1 8.17 0.26
 4 9 0 11.11 0.38
 4 9 0 11.45 0.35
 -4 -9 0 11.17 0.33
 -4 -9 0 11.52 0.37
 -4 -9 0 11.77 0.36
 5 8 -1 18.27 0.54
 -5 -8 1 18.48 0.49
 -5 -8 1 18.4 0.53
 -5 -8 1 18.94 0.52
 6 7 -2 0.82 0.12
 -6 -7 2 0.88 0.11
 -6 -7 2 1.12 0.14
 -6 -7 2 1.02 0.13
 7 6 -3 0.3 0.08
 -7 -6 3 0.31 0.09
 -7 -6 3 0.31 0.09
 8 5 -4 1.97 0.14
 -8 -5 4 1.86 0.15
 -8 -5 4 1.88 0.16
 9 4 -5 0.15 0.07
 -9 -4 5 0.08 0.09
 -9 -4 5 0.04 0.08
 0 -12 -4 3.52 0.16
 1 11 3 2.66 0.18
 1 11 3 2.5 0.19
 1 11 3 2.41 0.12
 -1 -11 -3 2.29 0.1
 -1 -11 -3 2.43 0.12
 2 10 2 6.58 0.28
 2 10 2 7.34 0.23
 2 10 2 6.41 0.3
 -2 -10 -2 6.7 0.22
 -2 -10 -2 6.62 0.19
 3 9 1 0.06 0.06
 3 9 1 0.04 0.04
 3 9 1 0.15 0.07
 -3 -9 -1 0.08 0.04
 -3 -9 -1 0.06 0.05
 -3 -9 -1 0.06 0.05
 -3 -9 -1 0.05 0.04
 4 8 0 12.69 0.35
 4 8 0 11.62 0.38
 -4 -8 0 11.76 0.33
 -4 -8 0 12.23 0.37
 -4 -8 0 11.52 0.36
 5 7 -1 0.66 0.11
 -5 -7 1 0.76 0.1
 -5 -7 1 0.62 0.09
 -5 -7 1 0.68 0.1
 6 6 -2 1.6 0.12
 -6 -6 2 1.73 0.12
 -6 -6 2 2.01 0.12
 -6 -6 2 1.86 0.13
 7 5 -3 0.16 0.06
 -7 -5 3 0.23 0.08
 -7 -5 3 0.2 0.07
 8 4 -4 0.06 0.05
 -8 -4 4 0.05 0.07
 -8 -4 4 -0.02 0.06
 9 3 -5 0 0.05
 -9 -3 5 -0.03 0.07
 -9 -3 5 -0.06 0.07
 1 -12 -5 5.8 0.23
 0 11 4 0.2 0.09
 0 11 4 0.17 0.09
 0 -11 -4 0.33 0.07
 1 10 3 2.15 0.16
 1 10 3 2.59 0.12
 1 10 3 2.33 0.16
 -1 -10 -3 2.28 0.1
 -1 -10 -3 2.33 0.11
 2 9 2 14.66 0.4
 2 9 2 15.57 0.49
 2 9 2 15.5 0.46
 -2 -9 -2 15.32 0.43
 -2 -9 -2 14.93 0.39
 -2 -9 -2 15.11 0.36
 -2 -9 -2 14.96 0.43
 3 8 1 1.69 0.12
 3 8 1 1.57 0.09
 -3 -8 -1 1.6 0.11
 -3 -8 -1 1.54 0.1
 -3 -8 -1 1.66 0.09
 -3 -8 -1 1.57 0.08
 4 7 0 0.27 0.07
 4 7 0 0.2 0.06
 4 7 0 0.24 0.05
 -4 -7 0 0.39 0.06
 -4 -7 0 0.32 0.07
 -4 -7 0 0.27 0.06
 5 6 -1 3.13 0.15
 5 6 -1 3.42 0.14
 -5 -6 1 3.53 0.15
 -5 -6 1 3.58 0.16
 -5 -6 1 3.48 0.16
 6 5 -2 4.31 0.18
 -6 -5 2 4.41 0.2
 -6 -5 2 4.2 0.19
 7 4 -3 1.71 0.11
 -7 -4 3 1.7 0.13
 -7 -4 3 1.72 0.14
 8 3 -4 3.3 0.16
 -8 -3 4 3.65 0.22
 -8 -3 4 3.56 0.21
 9 2 -5 0.04 0.05
 -9 -2 5 -0.01 0.07
 2 -12 -6 0.11 0.08
 -1 11 5 0.38 0.12
 1 -11 -5 0.28 0.08
 0 10 4 0.52 0.11
 0 10 4 0.57 0.13
 0 -10 -4 0.6 0.09
 1 9 3 15.14 0.38
 1 9 3 14.27 0.44
 1 9 3 14.75 0.47
 -1 -9 -3 14.18 0.34
 -1 -9 -3 14.08 0.37
 2 8 2 21.95 0.53
 2 8 2 21.13 0.62
 2 8 2 22.05 0.58
 -2 -8 -2 21.88 0.56
 -2 -8 -2 21.08 0.52
 -2 -8 -2 21.18 0.56
 -2 -8 -2 22.01 0.48
 -2 -8 -2 21.09 0.52
 3 7 1 12.04 0.39
 3 7 1 12.27 0.33
 3 7 1 12.28 0.37
 -3 -7 -1 12.54 0.35
 -3 -7 -1 12.58 0.36
 -3 -7 -1 12.29 0.32
 4 6 0 74.21 1.64
 4 6 0 74.2 1.74
 4 6 0 72.58 1.62
 -4 -6 0 72.66 1.69
 -4 -6 0 73.86 1.6
 -4 -6 0 73.52 1.64
 5 5 -1 4.45 0.14
 5 5 -1 4.19 0.19
 5 5 -1 4.28 0.17
 -5 -5 1 4.03 0.18
 -5 -5 1 4.35 0.17
 -5 -5 1 4.5 0.18
 -6 -4 2 2.32 0.13
 -6 -4 2 2 0.13
 7 3 -3 0 0.04
 -7 -3 3 0.01 0.05
 -7 -3 3 -0.03 0.05
 8 2 -4 2.22 0.12
 -8 -2 4 2.09 0.16
 9 1 -5 1.61 0.09
 -9 -1 5 2.06 0.23
 -2 11 6 0.84 0.16
 -2 11 6 1.18 0.19
 2 -11 -6 0.93 0.12
 -1 10 5 1.02 0.16
 -1 10 5 0.74 0.13
 1 -10 -5 0.84 0.1
 0 9 4 0.44 0.1
 0 9 4 0.46 0.1
 0 -9 -4 0.42 0.07
 1 8 3 2.62 0.15
 1 8 3 2.63 0.14
 -1 -8 -3 2.59 0.1
 -1 -8 -3 2.77 0.11
 2 7 2 0 0.02
 2 7 2 -0.03 0.03
 2 7 2 -0.02 0.03
 -2 -7 -2 0.02 0.03
 -2 -7 -2 0.04 0.03
 -2 -7 -2 -0.03 0.03
 -2 -7 -2 -0.02 0.02
 3 6 1 118.79 2.53
 3 6 1 121.98 2.68
 3 6 1 113.23 2.52
 -3 -6 -1 112.89 2.54
 -3 -6 -1 120.74 2.49
 -3 -6 -1 115.21 2.63
 4 5 0 173.04 3.72
 4 5 0 168.37 3.65
 4 5 0 171.31 3.87
 -4 -5 0 172.01 3.7
 -4 -5 0 169.9 3.84
 -4 -5 0 179.02 3.64
 5 4 -1 0.84 0.04
 -5 -4 1 0.77 0.07
 -5 -4 1 0.81 0.07
 -5 -4 1 0.93 0.1
 -6 -3 2 12.5 0.38
 -6 -3 2 12.68 0.4
 7 2 -3 1.78 0.1
 -7 -2 3 1.68 0.13
 8 1 -4 2.38 0.11
 -8 -1 4 2.14 0.17
 9 0 -5 0.56 0.04
 -9 0 5 0.77 0.15
 3 -11 -7 0.05 0.07
 -2 10 6 0.95 0.16
 -2 10 6 1.02 0.17
 2 -10 -6 1.29 0.13
 -1 9 5 9.34 0.34
 -1 9 5 8.68 0.35
 1 -9 -5 9.14 0.28
 0 8 4 10.77 0.35
 0 8 4 10.69 0.37
 0 -8 -4 10.85 0.29
 0 -8 -4 10.81 0.26
 1 7 3 12.5 0.37
 -1 -7 -3 12.57 0.32
 -1 -7 -3 12.9 0.29
 2 6 2 23.67 0.55
 2 6 2 24.49 0.63
 2 6 2 22.91 0.59
 -2 -6 -2 24.73 0.51
 -2 -6 -2 23.6 0.55
 3 5 1 21.81 0.51
 3 5 1 22.32 0.57
 3 5 1 21.74 0.54
 -3 -5 -1 22.08 0.51
 -3 -5 -1 21.8 0.53
 -3 -5 -1 21.45 0.54
 4 4 0 57.08 1.25
 4 4 0 56.61 1.27
 -4 -4 0 57.69 1.29
 -4 -4 0 55.69 1.34
 -4 -4 0 58.69 1.27
 -4 -4 0 60.01 1.28
 5 3 -1 2.36 0.1
 -5 -3 1 2.48 0.12
 -5 -3 1 2.32 0.13
 -5 -3 1 2.5 0.12
 -5 -3 1 2.5 0.11
 -5 -3 1 2.66 0.12
 6 2 -2 17.55 0.43
 6 2 -2 17.21 0.43
 -6 -2 2 17.46 0.49
 7 1 -3 -0.01 0.03
 -7 -1 3 0.08 0.06
 8 0 -4 0.85 0.05
 -8 0 4 1.14 0.16
 -9 1 5 3.05 0.22
 -3 10 7 4.5 0.27
 -3 10 7 4.75 0.29
 3 -10 -7 4.54 0.2
 -2 9 6 30.51 0.85
 -2 9 6 30.33 0.88
 -2 9 6 31.33 0.83
 2 -9 -6 31 0.75
 -1 8 5 33.65 0.86
 1 -8 -5 34.87 0.8
 0 7 4 2.53 0.13
 0 7 4 2.26 0.14
 0 -7 -4 2.47 0.1
 0 -7 -4 2.52 0.09
 1 6 3 1.37 0.09
 1 6 3 1.63 0.09
 -1 -6 -3 1.18 0.07
 -1 -6 -3 1.58 0.07
 -1 -6 -3 1.5 0.06
 2 5 2 14.12 0.37
 2 5 2 14.43 0.35
 2 5 2 14.64 0.4
 -2 -5 -2 14.55 0.35
 3 4 1 18.89 0.47
 3 4 1 20 0.45
 -3 -4 -1 19.57 0.48
 -3 -4 -1 18.92 0.47
 -3 -4 -1 20.19 0.46
 -3 -4 -1 19.81 0.45
 4 3 0 146.69 3.14
 -4 -3 0 139.52 3.32
 -4 -3 0 144.27 3.54
 -4 -3 0 154.92 3.18
 5 2 -1 67.66 1.47
 5 2 -1 69.58 1.47
 -5 -2 1 66.2 1.53
 -5 -2 1 67.21 1.53
 -5 -2 1 71.15 1.51
 6 1 -2 26.37 0.59
 -6 -1 2 25.36 0.68
 7 0 -3 47.04 1.01
 7 0 -3 48.14 1.01
 -7 0 3 44.72 1.15
 -8 1 4 3.64 0.22
 -9 2 5 10.18 0.43
 4 -10 -8 1.6 0.17
 -3 9 7 1.28 0.19
 -3 9 7 1.37 0.19
 3 -9 -7 1.32 0.14
 -2 8 6 29.48 0.8
 -2 8 6 29.53 0.83
 -2 8 6 29.79 0.78
 2 -8 -6 28.1 0.71
 -1 7 5 28.54 0.72
 -1 7 5 28.28 0.74
 -1 7 5 28.43 0.77
 1 -7 -5 28.06 0.66
 1 -7 -5 28.33 0.71
 1 -7 -5 27.45 0.71
 0 6 4 11.79 0.34
 0 -6 -4 11.97 0.27
 0 -6 -4 11.82 0.32
 0 -6 -4 11.73 0.3
 0 -6 -4 12.32 0.33
 1 5 3 9.83 0.29
 1 5 3 9.24 0.27
 -1 -5 -3 9.32 0.22
 -1 -5 -3 9.81 0.26
 -1 -5 -3 9.33 0.24
 -1 -5 -3 9.1 0.25
 2 4 2 0.1 0.03
 2 4 2 0.06 0.02
 2 4 2 0.15 0.03
 -2 -4 -2 0.11 0.03
 -2 -4 -2 0.02 0.02
 -2 -4 -2 0.07 0.02
 -2 -4 -2 0.08 0.02
 -3 -3 -1 91.03 1.98
 4 2 0 0.05 0.02
 4 2 0 0.14 0.02
 -4 -2 0 0.01 0.01
 -4 -2 0 0.04 0.02
 5 1 -1 28.53 0.63
 -5 -1 1 29.85 0.7
 -5 -1 1 28.14 0.71
 -5 -1 1 30.31 0.67
 6 0 -2 11.11 0.25
 6 0 -2 10.51 0.25
 -6 0 2 10.27 0.34
 -7 1 3 47.21 1.17
 -8 2 4 4.95 0.26
 -9 3 5 3.29 0.24
 -4 9 8 1.09 0.19
 4 -9 -8 0.91 0.13
 -3 8 7 1.49 0.19
 -3 8 7 1.7 0.21
 -3 8 7 1.44 0.19
 3 -8 -7 1.15 0.1
 -2 7 6 0.38 0.09
 -2 7 6 0.38 0.09
 -2 7 6 0.42 0.1
 2 -7 -6 0.47 0.09
 2 -7 -6 0.44 0.08
 -1 6 5 0.11 0.05
 -1 6 5 0.07 0.04
 -1 6 5 0.01 0.04
 1 -6 -5 0.07 0.04
 1 -6 -5 0.09 0.04
 1 -6 -5 0.03 0.03
 0 5 4 6.3 0.21
 0 5 4 5.74 0.21
 0 -5 -4 6.17 0.18
 0 -5 -4 5.98 0.19
 0 -5 -4 5.79 0.15
 0 -5 -4 5.99 0.17
 0 -5 -4 5.96 0.19
 1 4 3 18.53 0.47
 1 4 3 17.98 0.44
 1 4 3 18.6 0.41
 -1 -4 -3 18.41 0.43
 -1 -4 -3 18.11 0.38
 -1 -4 -3 17.05 0.43
 -1 -4 -3 18.54 0.44
 -1 -4 -3 18.49 0.41
 -2 -3 -2 7.45 0.18
 -2 -3 -2 7.28 0.19
 -2 -3 -2 7.45 0.19
 3 2 1 22.29 0.46
 3 2 1 21.3 0.45
 -3 -2 -1 21.17 0.51
 -4 -1 0 27.16 0.65
 -4 -1 0 27.49 0.63
 -5 0 1 21.71 0.53
 -5 0 1 20.65 0.54
 -5 0 1 21.61 0.49
 -5 0 1 21.23 0.53
 -6 1 2 4.64 0.2
 -7 2 3 3.16 0.19
 -8 3 4 0.25 0.1
 -4 8 8 1.39 0.2
 4 -8 -8 1.14 0.11
 -3 7 7 -0.08 0.05
 -3 7 7 -0.04 0.06
 -3 7 7 -0.02 0.06
 3 -7 -7 0.05 0.05
 -2 6 6 0.11 0.06
 -2 6 6 0.24 0.08
 -2 6 6 0.2 0.07
 2 -6 -6 0.16 0.06
 2 -6 -6 0.16 0.06
 2 -6 -6 0.2 0.05
 -1 5 5 2.1 0.12
 1 -5 -5 2.09 0.11
 1 -5 -5 2.23 0.1
 1 -5 -5 2.12 0.1
 1 -5 -5 2.17 0.09
 0 4 4 10.05 0.3
 0 4 4 9.69 0.28
 0 4 4 10.27 0.22
 0 4 4 10.05 0.28
 0 -4 -4 9.15 0.26
 0 -4 -4 10.12 0.24
 0 -4 -4 10.11 0.27
 0 -4 -4 9.75 0.27
 0 -4 -4 9.48 0.22
 1 3 3 3.44 0.11
 -1 -3 -3 3.59 0.11
 -1 -3 -3 3.32 0.1
 -1 -3 -3 3.44 0.09
 -1 -3 -3 3.52 0.11
 -2 -2 -2 29.15 0.65
 -2 -2 -2 28.68 0.66
 -3 -1 -1 7.93 0.2
 -3 -1 -1 7.79 0.2
 -4 0 0 49.59 1.16
 -4 0 0 53.15 1.14
 -4 0 0 52.89 1.18
 -5 1 1 9.42 0.24
 -5 1 1 9.31 0.27
 -5 1 1 9.56 0.29
 -5 1 1 9.33 0.27
 -6 2 2 0.6 0.1
 -7 3 3 1.63 0.14
 -8 4 4 2.56 0.2
 5 -8 -9 6.91 0.27
 -4 7 8 0.11 0.09
 4 -7 -8 0.22 0.07
 -3 6 7 1.84 0.2
 -3 6 7 1.59 0.13
 3 -6 -7 1.29 0.1
 -2 5 6 5.62 0.22
 -2 5 6 5.34 0.23
 2 -5 -6 5.45 0.22
 2 -5 -6 5.57 0.19
 2 -5 -6 5.76 0.21
 2 -5 -6 5.72 0.2
 -1 4 5 46.38 1.09
 -1 4 5 47.32 1.12
 -1 4 5 47.51 1.16
 1 -4 -5 50.4 1.09
 1 -4 -5 47.46 1.05
 1 -4 -5 48.23 1.1
 1 -4 -5 47.52 1.12
 0 3 4 -0.06 0.01
 0 3 4 -0.04 0.03
 0 3 4 -0.11 0.02
 0 3 4 -0.03 0.03
 0 -3 -4 -0.08 0.02
 0 -3 -4 -0.1 0.01
 0 -3 -4 -0.11 0.01
 0 -3 -4 -0.08 0.01
 1 2 3 560.92 12.72
 -1 -2 -3 577.46 12.59
 -1 -2 -3 527.32 12.62
 -1 -2 -3 576 11.39
 -2 -1 -2 368.23 8.06
 -3 0 -1 0.31 0.02
 -3 0 -1 0.22 0.02
 -3 0 -1 0.25 0.01
 -3 0 -1 0.24 0.01
 -4 1 0 3.5 0.12
 -4 1 0 3.68 0.13
 -4 1 0 3.74 0.12
 -4 1 0 3.67 0.13
 -5 2 1 0.16 0.04
 -5 2 1 0.14 0.04
 -6 3 2 0.19 0.07
 -6 3 2 0.18 0.07
 -7 4 3 0.54 0.12
 -8 5 4 1.81 0.22
 -5 7 9 2.15 0.27
 5 -7 -9 1.65 0.13
 -4 6 8 9.8 0.4
 -4 6 8 9.83 0.38
 4 -6 -8 9.7 0.32
 -3 5 7 8.51 0.33
 -3 5 7 8.16 0.31
 3 -5 -7 8.53 0.27
 3 -5 -7 8.24 0.27
 3 -5 -7 8.6 0.3
 -2 4 6 15.41 0.44
 2 -4 -6 14.48 0.39
 2 -4 -6 15.64 0.41
 2 -4 -6 15.9 0.44
 2 -4 -6 15.69 0.43
 -1 3 5 10.45 0.32
 -1 3 5 10.25 0.3
 1 -3 -5 10.14 0.27
 1 -3 -5 10.31 0.29
 1 -3 -5 10.73 0.3
 1 -3 -5 10.86 0.29
 0 2 4 9.55 0.26
 0 2 4 9.84 0.2
 0 2 4 9.24 0.25
 0 -2 -4 9.74 0.23
 0 -2 -4 8.87 0.24
 0 -2 -4 9.27 0.24
 0 -2 -4 8.85 0.25
 -1 -1 -3 193.18 4.03
 -1 -1 -3 182.19 4.47
 -3 1 -1 10.86 0.25
 -3 1 -1 11.02 0.26
 -3 1 -1 10.76 0.26
 -4 2 0 4.52 0.15
 -4 2 0 4.62 0.14
 -4 2 0 4.29 0.15
 -4 2 0 4.56 0.14
 -6 4 2 1.22 0.15
 -6 4 2 0.99 0.13
 -7 5 3 0.65 0.13
 -7 5 3 0.71 0.14
 -8 6 4 -0.03 0.08
 -5 6 9 -0.08 0.07
 5 -6 -9 0 0.06
 -4 5 8 40.97 1.06
 -4 5 8 42.13 1.11
 4 -5 -8 41.09 0.98
 -3 4 7 55.76 1.41
 -3 4 7 59.34 1.37
 3 -4 -7 58.93 1.33
 3 -4 -7 58.89 1.31
 -2 3 6 2.09 0.13
 -2 3 6 2.38 0.13
 2 -3 -6 2.34 0.11
 2 -3 -6 2.13 0.1
 2 -3 -6 2.4 0.13
 -1 2 5 52.52 1.16
 -1 2 5 50.82 1.19
 1 -2 -5 50.47 1.13
 1 -2 -5 51.76 1.2
 1 -2 -5 52.85 1.18
 1 -2 -5 53 1.16
 0 1 4 39.79 0.8
 0 1 4 39.6 0.86
 0 1 4 40.73 0.9
 0 -1 -4 38.94 0.88
 0 -1 -4 40.17 0.91
 0 -1 -4 39.14 0.89
 0 -1 -4 41.37 0.92
 -1 0 -3 299.21 7.11
 -1 0 -3 312.4 7.12
 -1 0 -3 302.22 7.18
 -1 0 -3 309.52 7.33
 -2 1 -2 67.47 1.44
 -3 2 -1 15.97 0.37
 -3 2 -1 15.09 0.38
 -3 2 -1 15.45 0.36
 -4 3 0 8.5 0.23
 -4 3 0 8.4 0.26
 -4 3 0 8.73 0.24
 -5 4 1 3.71 0.17
 -6 5 2 4.76 0.23
 -6 5 2 4.81 0.23
 -7 6 3 -0.05 0.06
 -7 6 3 -0.04 0.06
 6 -6 -10 0.02 0.07
 -5 5 9 0.32 0.11
 -5 5 9 0.38 0.13
 5 -5 -9 0.3 0.08
 -4 4 8 30.96 0.82
 -4 4 8 29.88 0.86
 4 -4 -8 30.39 0.75
 -3 3 7 11.59 0.38
 -3 3 7 12.19 0.41
 3 -3 -7 12.15 0.35
 3 -3 -7 11.8 0.34
 -2 2 6 29.83 0.73
 -2 2 6 29.4 0.76
 2 -2 -6 29.3 0.69
 2 -2 -6 30.72 0.72
 -1 1 5 17.34 0.43
 -1 1 5 17.02 0.45
 1 -1 -5 16.21 0.42
 1 -1 -5 16.53 0.44
 1 -1 -5 17.98 0.41
 0 0 4 3.78 0.12
 0 0 -4 3.47 0.1
 0 0 -4 3.42 0.12
 0 0 -4 3.57 0.13
 -1 1 -3 255.1 6.09
 -1 1 -3 257.1 5.92
 -1 1 -3 258.01 6.26
 -2 2 -2 44.18 0.94
 -2 2 -2 42.52 0.98
 -2 2 -2 43.64 0.97
 -3 3 -1 21.22 0.53
 -3 3 -1 21.88 0.5
 -3 3 -1 21.06 0.49
 -4 4 0 31.21 0.72
 -5 5 1 6.03 0.24
 -5 5 1 6.42 0.24
 -6 6 2 3.97 0.22
 -6 6 2 4.47 0.23
 -7 7 3 0.12 0.09
 -7 7 3 0.2 0.1
 6 -5 -10 1.74 0.14
 -5 4 9 3.37 0.22
 -5 4 9 2.96 0.22
 5 -4 -9 3.12 0.17
 -4 3 8 4.4 0.24
 -4 3 8 4.98 0.24
 4 -3 -8 4.97 0.19
 4 -3 -8 4.67 0.19
 -3 2 7 0.56 0.11
 -3 2 7 0.73 0.11
 3 -2 -7 0.66 0.09
 3 -2 -7 0.53 0.07
 -2 1 6 16.43 0.47
 -2 1 6 16.66 0.45
 2 -1 -6 17.83 0.45
 2 -1 -6 16.73 0.42
 -1 0 5 30.26 0.73
 -1 0 5 29.81 0.7
 1 0 -5 31.33 0.69
 1 0 -5 30.03 0.7
 0 -1 4 0.43 0.05
 0 1 -4 0.31 0.02
 0 1 -4 0.51 0.06
 -1 2 -3 0.35 0.04
 -1 2 -3 0.22 0.02
 -1 2 -3 0.28 0.03
 -2 3 -2 11.82 0.28
 -2 3 -2 11.44 0.31
 -2 3 -2 11.64 0.29
 -3 4 -1 30.82 0.71
 -3 4 -1 30.39 0.69
 -3 4 -1 29.86 0.75
 -5 6 1 0.87 0.12
 -5 6 1 0.77 0.11
 -6 7 2 2.35 0.17
 -6 7 2 2.84 0.19
 6 -4 -10 0.58 0.11
 -5 3 9 13.02 0.48
 -5 3 9 13.17 0.46
 5 -3 -9 12.15 0.39
 -4 2 8 10.25 0.37
 -4 2 8 10.01 0.38
 4 -2 -8 10.17 0.32
 4 -2 -8 10.49 0.36
 4 -2 -8 10.34 0.36
 4 -2 -8 10.17 0.32
 -3 1 7 2.27 0.13
 3 -1 -7 2.14 0.12
 3 -1 -7 2.28 0.12
 3 -1 -7 2.25 0.13
 3 -1 -7 2.15 0.12
 -2 0 6 0.34 0.07
 -2 0 6 0.58 0.08
 2 0 -6 0.32 0.06
 2 0 -6 0.47 0.07
 2 0 -6 0.42 0.06
 2 0 -6 0.41 0.07
 -1 -1 5 11.18 0.29
 -1 -1 5 11.63 0.32
 -1 -1 5 11.33 0.32
 1 1 -5 11.54 0.32
 1 1 -5 11.84 0.32
 1 1 -5 11.88 0.3
 1 1 -5 11.26 0.3
 0 -2 4 7.63 0.19
 0 -2 4 7.65 0.16
 0 -2 4 8.04 0.21
 0 2 -4 7.55 0.19
 0 2 -4 7.68 0.23
 0 2 -4 7.58 0.22
 1 -3 3 33.01 0.66
 -1 3 -3 30.11 0.73
 -1 3 -3 31.5 0.71
 -2 4 -2 0.48 0.05
 -2 4 -2 0.44 0.05
 -4 6 0 0.09 0.05
 -5 7 1 7.18 0.29
 -5 7 1 7.39 0.3
 -6 8 2 1.35 0.18
 -6 8 2 1.43 0.19
 -6 3 10 0.36 0.13
 6 -3 -10 0.26 0.09
 -5 2 9 29.09 0.84
 -5 2 9 28.17 0.8
 5 -2 -9 28.38 0.73
 -4 1 8 11.28 0.38
 -4 1 8 11.59 0.41
 4 -1 -8 10.81 0.38
 4 -1 -8 10.52 0.33
 4 -1 -8 11.34 0.35
 4 -1 -8 10.67 0.37
 -3 0 7 7.15 0.26
 3 0 -7 7.45 0.24
 3 0 -7 7.01 0.26
 3 0 -7 7.63 0.25
 3 0 -7 6.97 0.26
 -2 -1 6 38.52 0.93
 -2 -1 6 37.02 0.87
 -2 -1 6 37.23 0.9
 2 1 -6 37.5 0.9
 2 1 -6 36.84 0.88
 2 1 -6 38.76 0.86
 2 1 -6 36.52 0.92
 -1 -2 5 8.38 0.23
 -1 -2 5 9.07 0.26
 1 2 -5 8.27 0.26
 1 2 -5 8.7 0.24
 1 2 -5 8.38 0.24
 1 2 -5 8.48 0.26
 0 -3 4 6.42 0.19
 0 -3 4 6.03 0.14
 0 -3 4 6.18 0.16
 0 -3 4 6.54 0.17
 0 3 -4 6.3 0.2
 0 3 -4 6.2 0.2
 0 3 -4 5.99 0.16
 1 -4 3 11.27 0.25
 1 -4 3 11.87 0.26
 -1 4 -3 11.09 0.32
 -1 4 -3 11.53 0.3
 -2 5 -2 19.18 0.48
 -3 6 -1 26.31 0.7
 -4 7 0 0.64 0.11
 -5 8 1 0.14 0.08
 -6 2 10 0.08 0.09
 6 -2 -10 0.07 0.07
 -5 1 9 14.67 0.49
 -5 1 9 14.55 0.52
 5 -1 -9 14.76 0.44
 -4 0 8 7.64 0.32
 -4 0 8 7.89 0.3
 4 0 -8 8.28 0.28
 4 0 -8 7.36 0.3
 4 0 -8 7.7 0.27
 4 0 -8 7.92 0.29
 -3 -1 7 33.07 0.86
 -3 -1 7 33.58 0.84
 -3 -1 7 31.63 0.8
 3 1 -7 32.65 0.84
 3 1 -7 32.62 0.78
 3 1 -7 32.83 0.81
 3 1 -7 33.16 0.83
 -2 -2 6 50.88 1.18
 -2 -2 6 52.26 1.21
 -2 -2 6 51.01 1.14
 2 2 -6 51.31 1.15
 2 2 -6 51.13 1.22
 2 2 -6 49.1 1.16
 2 2 -6 49.64 1.18
 -1 -3 5 0.1 0.04
 -1 -3 5 0.12 0.03
 1 3 -5 0.06 0.02
 1 3 -5 0.08 0.04
 1 3 -5 0.11 0.04
 0 -4 4 1.53 0.07
 0 -4 4 1.81 0.09
 0 -4 4 1.62 0.06
 0 -4 4 1.61 0.05
 0 4 -4 1.57 0.09
 0 4 -4 1.5 0.06
 0 4 -4 1.69 0.09
 1 -5 3 16.68 0.37
 1 -5 3 18.04 0.4
 -1 5 -3 16.66 0.47
 -1 5 -3 16.76 0.44
 -2 6 -2 5.78 0.23
 -3 7 -1 4.29 0.21
 -4 8 0 0.02 0.06
 -5 9 1 4.56 0.26
 -6 1 10 1.78 0.23
 6 -1 -10 1.5 0.17
 -5 0 9 2.83 0.19
 5 0 -9 2.61 0.16
 -4 -1 8 7.68 0.31
 -4 -1 8 8.32 0.3
 -4 -1 8 8.31 0.32
 4 1 -8 8.36 0.29
 4 1 -8 8.15 0.31
 4 1 -8 8.19 0.31
 4 1 -8 7.93 0.29
 -3 -2 7 5.26 0.22
 -3 -2 7 5.11 0.2
 -3 -2 7 4.97 0.22
 3 2 -7 5.07 0.2
 3 2 -7 4.89 0.2
 3 2 -7 4.89 0.21
 3 2 -7 4.81 0.21
 -2 -3 6 1.82 0.09
 -2 -3 6 2.01 0.11
 -2 -3 6 2.11 0.12
 2 3 -6 1.98 0.12
 2 3 -6 2.14 0.11
 2 3 -6 2 0.11
 -1 -4 5 1.35 0.08
 1 4 -5 1.09 0.09
 1 4 -5 1.33 0.09
 1 4 -5 1.23 0.07
 0 -5 4 19.09 0.43
 0 -5 4 20.01 0.45
 0 -5 4 18.64 0.39
 0 5 -4 18.65 0.52
 0 5 -4 18.68 0.45
 1 -6 3 0.06 0.02
 -1 6 -3 0.03 0.04
 -2 7 -2 10.33 0.36
 -3 8 -1 5.19 0.25
 -4 9 0 1.01 0.16
 -6 0 10 1.86 0.22
 6 0 -10 1.71 0.18
 -5 -1 9 24.28 0.7
 5 1 -9 25.86 0.68
 -4 -2 8 11.27 0.37
 4 2 -8 11.86 0.37
 4 2 -8 11.64 0.4
 4 2 -8 11.76 0.38
 -3 -3 7 5.57 0.21
 3 3 -7 5.89 0.23
 3 3 -7 6.05 0.23
 3 3 -7 6.26 0.25
 -2 -4 6 4.33 0.15
 2 4 -6 4.32 0.19
 2 4 -6 4.49 0.18
 2 4 -6 4.31 0.17
 -1 -5 5 13.93 0.3
 1 5 -5 14.09 0.42
 1 5 -5 13.51 0.36
 0 -6 4 70.73 1.47
 0 -6 4 68.67 1.36
 0 6 -4 68.54 1.52
 0 6 -4 69.19 1.66
 1 -7 3 0.45 0.04
 -1 7 -3 0.49 0.1
 -2 8 -2 45.73 1.18
 -3 9 -1 9.62 0.38
 -4 10 0 0.04 0.08
 -6 -1 10 0.1 0.09
 6 1 -10 0.13 0.08
 -5 -2 9 12.66 0.42
 5 2 -9 12.75 0.42
 5 2 -9 13.11 0.42
 -4 -3 8 2.76 0.15
 4 3 -8 2.74 0.17
 4 3 -8 2.69 0.16
 4 3 -8 2.76 0.16
 -3 -4 7 21.28 0.54
 3 4 -7 20.94 0.58
 3 4 -7 21.86 0.58
 3 4 -7 21.84 0.62
 -2 -5 6 2.27 0.1
 2 5 -6 2.14 0.14
 2 5 -6 2.07 0.12
 2 5 -6 2.55 0.14
 -1 -6 5 22.5 0.52
 -1 -6 5 22.45 0.47
 1 6 -5 22.1 0.56
 1 6 -5 22.68 0.64
 0 -7 4 3.07 0.1
 0 7 -4 2.82 0.12
 0 7 -4 2.67 0.17
 1 -8 3 42.58 0.92
 -1 8 -3 42.44 1.11
 -2 9 -2 7.5 0.33
 -3 10 -1 2.93 0.21
 -6 -2 10 -0.04 0.07
 6 2 -10 -0.03 0.07
 -5 -3 9 1.43 0.16
 5 3 -9 1.29 0.12
 5 3 -9 1.78 0.2
 -4 -4 8 6.35 0.24
 4 4 -8 6.48 0.27
 4 4 -8 6.48 0.29
 4 4 -8 6.71 0.27
 -3 -5 7 3.2 0.14
 3 5 -7 3.48 0.2
 3 5 -7 3.32 0.18
 3 5 -7 3.61 0.18
 -2 -6 6 30.51 0.65
 -2 -6 6 31.62 0.72
 2 6 -6 30.92 0.77
 2 6 -6 30.16 0.84
 -1 -7 5 6.15 0.18
 -1 -7 5 6.24 0.16
 -1 -7 5 6.3 0.19
 1 7 -5 6.26 0.22
 1 7 -5 6.09 0.27
 0 -8 4 2.99 0.1
 0 8 -4 3 0.13
 0 8 -4 2.97 0.19
 1 -9 3 0.61 0.06
 -1 9 -3 0.52 0.12
 -2 10 -2 11.36 0.45
 -6 -3 10 1.08 0.16
 6 3 -10 1.01 0.17
 -5 -4 9 1.82 0.14
 5 4 -9 1.7 0.15
 5 4 -9 1.75 0.15
 -4 -5 8 1.09 0.12
 4 5 -8 1.29 0.16
 4 5 -8 1.28 0.17
 4 5 -8 1.11 0.14
 -3 -6 7 0.29 0.06
 3 6 -7 0.16 0.08
 3 6 -7 0.2 0.07
 -2 -7 6 1.52 0.09
 -2 -7 6 1.47 0.07
 2 7 -6 1.55 0.14
 2 7 -6 1.37 0.11
 -1 -8 5 0.6 0.04
 -1 -8 5 0.6 0.06
 1 8 -5 0.93 0.15
 1 8 -5 0.81 0.1
 0 -9 4 2.61 0.1
 0 9 -4 2.68 0.19
 0 9 -4 2.6 0.13
 1 -10 3 0.2 0.04
 -1 10 -3 0.28 0.11
 -2 11 -2 1.99 0.24
 -6 -4 10 2.15 0.16
 6 4 -10 2.02 0.18
 -5 -5 9 1.61 0.13
 5 5 -9 2.18 0.24
 -4 -6 8 0.11 0.06
 4 6 -8 0.05 0.07
 4 6 -8 0.13 0.07
 -3 -7 7 0.03 0.05
 3 7 -7 0.04 0.07
 3 7 -7 -0.03 0.04
 -2 -8 6 1.03 0.06
 -2 -8 6 1.07 0.08
 2 8 -6 1.27 0.11
 2 8 -6 1.41 0.19
 -1 -9 5 0.48 0.04
 -1 -9 5 0.56 0.07
 1 9 -5 0.65 0.14
 1 9 -5 0.54 0.09
 0 -10 4 0.33 0.05
 0 10 -4 0.28 0.07
 0 10 -4 0.3 0.11
 -1 11 -3 0.61 0.16
 -5 -6 9 1.19 0.11
 -4 -7 8 2.37 0.14
 4 7 -8 2.43 0.17
 -3 -8 7 0.51 0.07
 -3 -8 7 0.52 0.09
 3 8 -7 0.54 0.11
 3 8 -7 0.64 0.15
 -2 -9 6 0.09 0.06
 -2 -9 6 0.13 0.04
 2 9 -6 0.07 0.09
 2 9 -6 0.14 0.06
 -1 -10 5 0.38 0.06
 1 10 -5 0.44 0.09
 1 10 -5 0.47 0.14
 -4 -8 8 6.8 0.21
 -4 -8 8 7.07 0.25
 4 8 -8 7.44 0.32
 -3 -9 7 0.57 0.09
 -3 -9 7 0.5 0.07
 3 9 -7 0.57 0.15
 3 9 -7 0.63 0.12
 -2 -10 6 0.94 0.1
 -2 -10 6 0.88 0.05
 2 10 -6 1.14 0.14
 2 10 -6 0.9 0.19
 4 13 1 0.99 0.18
 -4 -13 -1 1.07 0.11
 -4 -13 -1 1.15 0.14
 5 12 0 0.84 0.17
 -5 -12 0 0.47 0.1
 -5 -12 0 0.6 0.09
 6 11 -1 0.77 0.15
 -6 -11 1 0.9 0.13
 7 10 -2 0.33 0.11
 8 9 -3 0.8 0.15
 3 13 2 -0.01 0.09
 -3 -13 -2 0.08 0.06
 -3 -13 -2 0.1 0.07
 4 12 1 0.84 0.16
 -4 -12 -1 1.1 0.13
 -4 -12 -1 1.11 0.11
 -4 -12 -1 1.27 0.14
 5 11 0 0.8 0.15
 -5 -11 0 0.66 0.09
 -5 -11 0 0.73 0.11
 6 10 -1 0.33 0.11
 -6 -10 1 0.43 0.09
 7 9 -2 0.27 0.1
 -7 -9 2 0.36 0.11
 -7 -9 2 0.38 0.1
 8 8 -3 0.76 0.13
 -8 -8 3 0.89 0.14
 -8 -8 3 1.15 0.16
 9 7 -4 0.18 0.09
 -9 -7 4 0.21 0.11
 -9 -7 4 0.07 0.08
 2 13 3 0.54 0.15
 -2 -13 -3 0.56 0.1
 -2 -13 -3 0.57 0.08
 3 12 2 10.71 0.41
 -3 -12 -2 10.54 0.29
 -3 -12 -2 10.71 0.32
 4 11 1 2.71 0.19
 -4 -11 -1 2.46 0.12
 -4 -11 -1 2.52 0.14
 5 10 0 5.3 0.26
 -5 -10 0 5.62 0.25
 -5 -10 0 5.3 0.21
 6 9 -1 1.42 0.13
 -6 -9 1 1.33 0.12
 -6 -9 1 1.36 0.11
 -6 -9 1 1.34 0.12
 7 8 -2 0.92 0.14
 -7 -8 2 1.06 0.15
 -7 -8 2 1.05 0.14
 8 7 -3 1.22 0.15
 -8 -7 3 1.15 0.16
 -8 -7 3 1.23 0.16
 9 6 -4 0.83 0.13
 -9 -6 4 0.81 0.16
 -9 -6 4 0.47 0.12
 1 13 4 0.49 0.15
 -1 -13 -4 0.35 0.09
 2 12 3 1.63 0.2
 -2 -12 -3 1.17 0.09
 -2 -12 -3 1.18 0.08
 3 11 2 3.36 0.21
 -3 -11 -2 3.6 0.14
 -3 -11 -2 3.61 0.16
 4 10 1 11.35 0.39
 -4 -10 -1 10.59 0.35
 -4 -10 -1 10.89 0.37
 -4 -10 -1 10.98 0.33
 -4 -10 -1 10.97 0.29
 5 9 0 3 0.18
 -5 -9 0 3.16 0.18
 -5 -9 0 3.11 0.16
 6 8 -1 5.65 0.25
 -6 -8 1 5.65 0.24
 -6 -8 1 6.05 0.25
 7 7 -2 2.35 0.15
 -7 -7 2 2.42 0.15
 -7 -7 2 2.22 0.15
 8 6 -3 0.31 0.08
 -8 -6 3 0.14 0.08
 -8 -6 3 0.23 0.09
 9 5 -4 0.65 0.1
 -9 -5 4 0.51 0.13
 -9 -5 4 0.5 0.12
 0 -13 -5 1.5 0.16
 1 12 4 0.28 0.11
 -1 -12 -4 0.08 0.05
 -1 -12 -4 0.16 0.07
 2 11 3 13.63 0.39
 2 11 3 13.96 0.46
 -2 -11 -3 13.75 0.37
 -2 -11 -3 13.36 0.34
 3 10 2 13.64 0.45
 3 10 2 13.81 0.39
 -3 -10 -2 14.09 0.42
 -3 -10 -2 14.06 0.38
 -3 -10 -2 14.32 0.43
 -3 -10 -2 13.93 0.38
 -3 -10 -2 14.15 0.35
 4 9 1 101.92 2.29
 -4 -9 -1 101.28 2.35
 -4 -9 -1 102.59 2.22
 -4 -9 -1 103.55 2.3
 5 8 0 318.36 6.78
 -5 -8 0 319.31 6.68
 -5 -8 0 314.93 6.79
 -5 -8 0 315.8 7.04
 6 7 -1 14.03 0.43
 -6 -7 1 14.39 0.43
 -6 -7 1 14.34 0.43
 7 6 -2 29.64 0.76
 -7 -6 2 30.73 0.83
 -7 -6 2 30.88 0.8
 8 5 -3 3.38 0.16
 -8 -5 3 3.58 0.2
 -8 -5 3 3.65 0.21
 9 4 -4 0.3 0.07
 -9 -4 4 0.13 0.09
 -9 -4 4 0.37 0.11
 0 12 5 0.09 0.09
 0 -12 -5 -0.04 0.06
 1 11 4 1.89 0.11
 1 11 4 1.63 0.15
 -1 -11 -4 1.78 0.09
 -1 -11 -4 1.58 0.1
 2 10 3 0.83 0.09
 2 10 3 0.91 0.15
 2 10 3 0.92 0.13
 -2 -10 -3 0.79 0.09
 -2 -10 -3 0.86 0.11
 -2 -10 -3 0.71 0.07
 3 9 2 1.81 0.1
 3 9 2 1.5 0.12
 -3 -9 -2 1.67 0.1
 -3 -9 -2 1.79 0.11
 -3 -9 -2 1.59 0.11
 -3 -9 -2 1.66 0.09
 4 8 1 2.43 0.12
 4 8 1 3.07 0.16
 -4 -8 -1 2.69 0.12
 -4 -8 -1 2.57 0.13
 -4 -8 -1 2.43 0.14
 5 7 0 4.37 0.19
 -5 -7 0 4.68 0.19
 -5 -7 0 4.62 0.19
 -5 -7 0 4.48 0.17
 6 6 -1 0.96 0.11
 -6 -6 1 1.13 0.12
 -6 -6 1 1 0.12
 7 5 -2 1.47 0.1
 -7 -5 2 1.3 0.11
 -7 -5 2 1.3 0.12
 8 4 -3 2.06 0.11
 -8 -4 3 1.79 0.15
 -8 -4 3 1.78 0.15
 9 3 -4 0.16 0.05
 -9 -3 4 0.21 0.1
 -9 -3 4 0.06 0.08
 1 -12 -6 0.23 0.08
 0 11 5 0.16 0.09
 0 -11 -5 0.17 0.07
 1 10 4 2.33 0.17
 1 10 4 2.19 0.11
 1 10 4 2.13 0.15
 -1 -10 -4 2.13 0.11
 -1 -10 -4 2.03 0.1
 2 9 3 1.87 0.14
 2 9 3 1.79 0.13
 2 9 3 1.94 0.1
 -2 -9 -3 1.73 0.1
 -2 -9 -3 1.8 0.08
 -2 -9 -3 1.63 0.11
 -2 -9 -3 1.8 0.1
 3 8 2 16.15 0.49
 3 8 2 15.94 0.46
 3 8 2 15.4 0.41
 -3 -8 -2 16.13 0.37
 -3 -8 -2 15.77 0.44
 -3 -8 -2 16.5 0.41
 -3 -8 -2 15.66 0.44
 4 7 1 2.07 0.12
 4 7 1 2.12 0.1
 4 7 1 2.35 0.14
 -4 -7 -1 1.96 0.11
 -4 -7 -1 2 0.1
 -4 -7 -1 1.92 0.11
 5 6 0 9.4 0.25
 5 6 0 9.39 0.29
 -5 -6 0 8.96 0.29
 -5 -6 0 9.39 0.28
 -5 -6 0 9.61 0.3
 -6 -5 1 2.38 0.14
 -6 -5 1 2.4 0.13
 7 4 -2 12.12 0.34
 -7 -4 2 11.85 0.41
 -7 -4 2 12.5 0.39
 8 3 -3 5.27 0.18
 -8 -3 3 5.54 0.25
 9 2 -4 1.82 0.08
 -9 -2 4 1.67 0.16
 2 -12 -7 -0.02 0.07
 -1 11 6 2.76 0.19
 1 -11 -6 2.14 0.13
 0 10 5 1.37 0.13
 0 10 5 1.84 0.2
 0 -10 -5 1.39 0.1
 1 9 4 1.03 0.14
 1 9 4 0.83 0.06
 1 9 4 1.25 0.15
 -1 -9 -4 0.84 0.06
 -1 -9 -4 1.09 0.12
 -1 -9 -4 0.82 0.07
 -1 -9 -4 0.88 0.07
 2 8 3 26.28 0.62
 2 8 3 25.82 0.67
 -2 -8 -3 25.7 0.56
 -2 -8 -3 26.13 0.61
 -2 -8 -3 26.35 0.65
 -2 -8 -3 25.41 0.65
 3 7 2 1.7 0.12
 3 7 2 1.82 0.11
 3 7 2 1.79 0.09
 -3 -7 -2 1.81 0.09
 -3 -7 -2 1.88 0.11
 -3 -7 -2 1.79 0.1
 4 6 1 63.69 1.39
 4 6 1 63.17 1.49
 4 6 1 63.72 1.41
 -4 -6 -1 63.04 1.37
 -4 -6 -1 61.53 1.42
 -4 -6 -1 62.6 1.46
 -5 -5 0 1.59 0.1
 -5 -5 0 1.51 0.09
 -5 -5 0 1.6 0.09
 6 4 -1 3.83 0.14
 -6 -4 1 3.38 0.17
 -6 -4 1 3.57 0.16
 7 3 -2 0.63 0.07
 -7 -3 2 0.42 0.09
 8 2 -3 3.92 0.13
 -8 -2 3 4.28 0.22
 -9 -1 4 7.52 0.33
 2 -11 -7 0.27 0.09
 -1 10 6 0.13 0.08
 -1 10 6 0.1 0.08
 -1 10 6 0.17 0.09
 1 -10 -6 0.15 0.07
 0 9 5 1.16 0.16
 0 9 5 1.3 0.16
 0 -9 -5 1.01 0.12
 0 -9 -5 1.08 0.1
 1 8 4 2.47 0.14
 1 8 4 2.55 0.15
 -1 -8 -4 2.6 0.13
 -1 -8 -4 2.44 0.11
 -1 -8 -4 2.47 0.1
 -1 -8 -4 2.57 0.09
 2 7 3 20.01 0.56
 2 7 3 19.2 0.52
 2 7 3 20.28 0.48
 -2 -7 -3 20.04 0.52
 -2 -7 -3 21.09 0.52
 -2 -7 -3 20.48 0.44
 -2 -7 -3 20.21 0.48
 3 6 2 0.32 0.06
 3 6 2 0.35 0.05
 3 6 2 0.34 0.06
 -3 -6 -2 0.31 0.06
 -3 -6 -2 0.41 0.06
 -3 -6 -2 0.35 0.05
 4 5 1 44.18 1.01
 4 5 1 46.65 0.99
 -4 -5 -1 44.19 1.03
 -4 -5 -1 46.29 1
 -4 -5 -1 44.37 1.06
 5 4 0 5.27 0.17
 5 4 0 5.43 0.18
 -5 -4 0 5.11 0.19
 -5 -4 0 5.83 0.19
 -5 -4 0 5.74 0.2
 -5 -4 0 5.65 0.18
 6 3 -1 32.93 0.74
 6 3 -1 32.53 0.73
 -6 -3 1 31.99 0.8
 7 2 -2 21.51 0.48
 7 2 -2 20.39 0.48
 -7 -2 2 20.79 0.58
 -8 -1 3 0.09 0.07
 -9 0 4 1.84 0.22
 3 -11 -8 7.94 0.3
 -2 10 7 3.54 0.22
 -2 10 7 3.72 0.24
 -2 10 7 3.83 0.24
 2 -10 -7 3.48 0.17
 -1 9 6 61.86 1.52
 -1 9 6 62.67 1.58
 -1 9 6 63.82 1.5
 1 -9 -6 64.18 1.41
 0 8 5 11.69 0.41
 0 8 5 12.6 0.39
 0 -8 -5 12.31 0.33
 0 -8 -5 12.01 0.36
 0 -8 -5 12.44 0.36
 1 7 4 12.09 0.37
 1 7 4 10.75 0.34
 -1 -7 -4 11.94 0.32
 -1 -7 -4 11.02 0.27
 -1 -7 -4 11.41 0.29
 -1 -7 -4 11.45 0.32
 2 6 3 13.2 0.36
 2 6 3 13.95 0.39
 2 6 3 13.74 0.33
 -2 -6 -3 13.22 0.36
 -2 -6 -3 13.24 0.3
 -2 -6 -3 13.65 0.33
 -2 -6 -3 13.44 0.36
 3 5 2 0.78 0.06
 3 5 2 0.77 0.04
 -3 -5 -2 0.73 0.05
 -3 -5 -2 0.79 0.06
 -3 -5 -2 0.72 0.05
 4 4 1 18.3 0.44
 -4 -4 -1 19.43 0.45
 -4 -4 -1 18.2 0.48
 -4 -4 -1 18.89 0.46
 5 3 0 1.2 0.06
 5 3 0 1.08 0.06
 -5 -3 0 1.16 0.07
 -5 -3 0 1.05 0.08
 -5 -3 0 1.01 0.07
 6 2 -1 38.76 0.84
 -6 -2 1 39.46 0.94
 -7 -1 2 20.99 0.59
 -8 0 3 1.24 0.16
 -9 1 4 0.04 0.08
 3 -10 -8 5.72 0.24
 -2 9 7 4.54 0.26
 -2 9 7 4.58 0.26
 -2 9 7 4.95 0.25
 2 -9 -7 4.84 0.2
 -1 8 6 76.78 1.73
 -1 8 6 75.29 1.83
 -1 8 6 73.55 1.76
 1 -8 -6 75.21 1.65
 0 7 5 33.79 0.83
 0 -7 -5 33.89 0.7
 0 -7 -5 33.68 0.76
 1 6 4 31.33 0.74
 1 6 4 31.24 0.79
 -1 -6 -4 31.75 0.64
 -1 -6 -4 31.83 0.74
 -1 -6 -4 28.07 0.72
 -1 -6 -4 31.59 0.69
 2 5 3 67.75 1.61
 2 5 3 69.69 1.52
 2 5 3 70.1 1.61
 -2 -5 -3 68.05 1.53
 -2 -5 -3 69.81 1.58
 -2 -5 -3 72.07 1.49
 -2 -5 -3 71.06 1.39
 -3 -4 -2 31.39 0.71
 -3 -4 -2 32.46 0.7
 -3 -4 -2 30.97 0.73
 -3 -4 -2 30.26 0.71
 4 3 1 57.15 1.18
 4 3 1 54.72 1.17
 -4 -3 -1 57.56 1.2
 -4 -3 -1 53.52 1.22
 -4 -3 -1 53.23 1.27
 -5 -2 0 2.24 0.11
 -5 -2 0 2.07 0.1
 -5 -2 0 2.1 0.08
 -5 -2 0 2.16 0.1
 -6 -1 1 5.62 0.22
 -7 0 2 15.96 0.48
 -8 1 3 3.62 0.21
 -9 2 4 14.64 0.52
 4 -10 -9 2.53 0.17
 -3 9 8 0.1 0.09
 -3 9 8 0.15 0.1
 3 -9 -8 0.06 0.06
 -2 8 7 0.41 0.11
 -2 8 7 0.44 0.11
 -2 8 7 0.25 0.1
 2 -8 -7 0.29 0.07
 -1 7 6 22.08 0.62
 -1 7 6 22.8 0.61
 -1 7 6 22.52 0.65
 1 -7 -6 22.65 0.55
 0 6 5 17.46 0.5
 0 6 5 17.34 0.47
 0 6 5 17.53 0.49
 0 -6 -5 17.89 0.42
 0 -6 -5 17.82 0.46
 0 -6 -5 18.31 0.39
 1 5 4 32.27 0.76
 1 5 4 33.46 0.81
 -1 -5 -4 32.76 0.76
 -1 -5 -4 32.62 0.67
 -1 -5 -4 33 0.72
 2 4 3 11.2 0.27
 -2 -4 -3 12.35 0.28
 -2 -4 -3 11.41 0.29
 3 3 2 13.64 0.31
 -3 -3 -2 13.79 0.31
 -3 -3 -2 13.06 0.35
 -3 -3 -2 13.27 0.3
 -4 -2 -1 65.08 1.47
 -5 -1 0 17.41 0.45
 -5 -1 0 17.38 0.45
 -5 -1 0 18.85 0.4
 -7 1 2 0.33 0.08
 -8 2 3 7.45 0.32
 -9 3 4 0.02 0.07
 4 -9 -9 7.97 0.3
 -3 8 8 5.42 0.27
 -3 8 8 5.53 0.29
 3 -8 -8 5.36 0.22
 -2 7 7 41.62 1.1
 -2 7 7 41.25 1.07
 -2 7 7 41.86 1.04
 2 -7 -7 41.04 0.96
 -1 6 6 9.22 0.34
 -1 6 6 9.19 0.31
 1 -6 -6 9.17 0.26
 1 -6 -6 9.4 0.29
 0 5 5 4.21 0.17
 0 5 5 4.2 0.17
 0 5 5 4.05 0.18
 0 -5 -5 4.2 0.13
 0 -5 -5 4.2 0.12
 0 -5 -5 4.34 0.16
 1 4 4 20.34 0.49
 1 4 4 20.46 0.45
 1 4 4 19.46 0.51
 -1 -4 -4 19.63 0.45
 -1 -4 -4 20.22 0.42
 -1 -4 -4 21.07 0.48
 -2 -3 -3 7.5 0.18
 -2 -3 -3 7.58 0.18
 -3 -2 -2 0.19 0.03
 -3 -2 -2 0.17 0.03
 -3 -2 -2 0.21 0.03
 -4 -1 -1 6.37 0.17
 -4 -1 -1 6.46 0.17
 -4 -1 -1 6.05 0.18
 -5 0 0 0.66 0.08
 -5 0 0 0.69 0.05
 -5 0 0 0.75 0.06
 -7 2 2 9.66 0.35
 -8 3 3 2.53 0.19
 4 -8 -9 0.25 0.08
 -3 7 8 2.48 0.18
 -3 7 8 2.78 0.2
 3 -7 -8 2.54 0.15
 -2 6 7 13.69 0.45
 -2 6 7 13.83 0.43
 2 -6 -7 14.33 0.4
 2 -6 -7 13.13 0.38
 -1 5 6 1.2 0.11
 -1 5 6 1.12 0.09
 1 -5 -6 1.12 0.08
 1 -5 -6 1.21 0.07
 0 4 5 21.48 0.54
 0 4 5 21.82 0.46
 0 4 5 21.38 0.55
 0 4 5 21.26 0.57
 0 -4 -5 22.47 0.53
 0 -4 -5 22.49 0.5
 1 3 4 0.64 0.02
 1 3 4 0.71 0.03
 1 3 4 0.61 0.05
 -1 -3 -4 0.48 0.03
 -1 -3 -4 0.64 0.03
 -1 -3 -4 0.72 0.04
 -2 -2 -3 69.11 1.56
 -2 -2 -3 70.72 1.57
 -3 -1 -2 16.31 0.36
 -4 0 -1 29.02 0.65
 -4 0 -1 28.85 0.66
 -4 0 -1 29.43 0.66
 -4 0 -1 28.33 0.66
 -5 1 0 25.87 0.6
 -5 1 0 24.54 0.61
 -5 1 0 24.38 0.62
 -5 1 0 24.7 0.59
 -7 3 2 0.01 0.05
 -8 4 3 1.73 0.16
 5 -8 -10 1.85 0.15
 -4 7 9 2.09 0.19
 -4 7 9 2.31 0.25
 4 -7 -9 1.91 0.13
 -3 6 8 0.06 0.07
 -3 6 8 -0.08 0.05
 3 -6 -8 -0.02 0.05
 -2 5 7 1.56 0.13
 -2 5 7 1.72 0.12
 2 -5 -7 1.71 0.1
 2 -5 -7 1.68 0.1
 -1 4 6 4.26 0.17
 -1 4 6 4.15 0.18
 1 -4 -6 4.15 0.14
 1 -4 -6 4.2 0.16
 0 3 5 0.33 0.02
 0 3 5 0.26 0.05
 0 3 5 0.32 0.05
 0 -3 -5 0.24 0.04
 0 -3 -5 0.38 0.04
 1 2 4 44.6 1
 -1 -2 -4 46.32 1
 -1 -2 -4 44.44 0.9
 -1 -2 -4 45.19 0.98
 -2 -1 -3 88.24 1.88
 -2 -1 -3 87.15 1.87
 -4 1 -1 0.74 0.04
 -4 1 -1 0.77 0.05
 -4 1 -1 0.73 0.04
 -4 1 -1 0.82 0.04
 -5 2 0 1.71 0.08
 -5 2 0 1.65 0.09
 -5 2 0 1.54 0.08
 -6 3 1 0.13 0.06
 -6 3 1 0.13 0.06
 -7 4 2 1.04 0.15
 -7 4 2 1.38 0.17
 -8 5 3 0.28 0.11
 5 -7 -10 16.19 0.49
 -4 6 9 0.02 0.07
 -4 6 9 0.25 0.1
 4 -6 -9 0.09 0.06
 -3 5 8 42.46 1.05
 -3 5 8 41.44 1.09
 3 -5 -8 42 1
 3 -5 -8 39.52 0.97
 3 -5 -8 42.53 1.05
 -2 4 7 3.92 0.19
 2 -4 -7 4.2 0.16
 2 -4 -7 4.29 0.21
 2 -4 -7 4.4 0.17
 2 -4 -7 4.29 0.18
 -1 3 6 2.96 0.14
 -1 3 6 2.83 0.15
 -1 3 6 3.16 0.09
 1 -3 -6 2.96 0.12
 1 -3 -6 3.1 0.12
 1 -3 -6 2.71 0.12
 0 2 5 2.74 0.07
 0 2 5 2.56 0.12
 0 2 5 2.54 0.1
 0 -2 -5 2.86 0.09
 0 -2 -5 2.59 0.1
 -1 -1 -4 7.24 0.15
 -1 -1 -4 7.62 0.2
 -1 -1 -4 7.28 0.18
 -2 0 -3 9.7 0.21
 -2 0 -3 9.67 0.21
 -3 1 -2 23.6 0.51
 -4 2 -1 0.65 0.04
 -4 2 -1 0.64 0.05
 -4 2 -1 0.69 0.04
 -5 3 0 2.17 0.1
 -5 3 0 2.14 0.11
 -6 4 1 3.07 0.16
 -6 4 1 3.11 0.17
 -7 5 2 0.23 0.09
 -7 5 2 0.33 0.1
 -8 6 3 3.11 0.23
 5 -6 -10 1.38 0.12
 -4 5 9 11.16 0.42
 -4 5 9 11.21 0.44
 4 -5 -9 11.18 0.35
 -3 4 8 68.76 1.59
 -3 4 8 67.89 1.63
 3 -4 -8 66.64 1.52
 3 -4 -8 68.88 1.6
 3 -4 -8 67.38 1.54
 3 -4 -8 67.09 1.62
 -2 3 7 8.74 0.32
 -2 3 7 8.53 0.29
 2 -3 -7 8.66 0.28
 2 -3 -7 8.9 0.26
 2 -3 -7 8.58 0.29
 2 -3 -7 8.66 0.27
 -1 2 6 120.77 2.56
 -1 2 6 113.08 2.5
 1 -2 -6 119.18 2.49
 1 -2 -6 113.12 2.54
 1 -2 -6 115.44 2.64
 1 -2 -6 115.84 2.55
 0 1 5 44.32 0.86
 0 1 5 41.68 0.92
 0 1 5 43.06 0.98
 0 -1 -5 43.69 0.96
 0 -1 -5 43.68 0.99
 -1 0 -4 105.02 2.28
 -1 0 -4 106.9 2.19
 -1 0 -4 106.55 2.39
 -1 0 -4 107.17 2.89
 -2 1 -3 104.43 2.23
 -3 2 -2 1.61 0.05
 -3 2 -2 1.6 0.06
 -3 2 -2 1.83 0.06
 -4 3 -1 20.06 0.48
 -4 3 -1 19.51 0.5
 -4 3 -1 20.06 0.46
 -5 4 0 28.92 0.74
 -6 5 1 9.38 0.33
 -6 5 1 9.44 0.34
 -7 6 2 -0.01 0.06
 -7 6 2 0 0.06
 -5 5 10 14.12 0.52
 5 -5 -10 14.64 0.45
 -4 4 9 2.15 0.17
 -4 4 9 1.99 0.17
 4 -4 -9 2.05 0.13
 -3 3 8 26.59 0.75
 -3 3 8 26.86 0.72
 3 -3 -8 27.33 0.68
 3 -3 -8 26.08 0.71
 3 -3 -8 26.31 0.66
 3 -3 -8 26.48 0.71
 -2 2 7 50.24 1.22
 -2 2 7 50.81 1.18
 2 -2 -7 52.57 1.21
 2 -2 -7 49.92 1.22
 2 -2 -7 50.94 1.15
 2 -2 -7 51.8 1.18
 -1 1 6 147.56 3.17
 -1 1 6 150.22 3.16
 1 -1 -6 147.27 3.14
 1 -1 -6 144.65 3.16
 1 -1 -6 140.99 3.32
 1 -1 -6 145.15 3.21
 0 0 5 11.46 0.32
 0 0 5 12.05 0.25
 0 0 -5 11.45 0.29
 0 0 -5 13.84 0.32
 0 0 -5 11.56 0.33
 0 0 -5 12.05 0.32
 -1 1 -4 9.59 0.25
 -1 1 -4 9.83 0.25
 -1 1 -4 9.28 0.24
 -2 2 -3 13.3 0.32
 -2 2 -3 13.86 0.32
 -2 2 -3 13.4 0.32
 -3 3 -2 17.82 0.44
 -3 3 -2 17.4 0.41
 -3 3 -2 17.59 0.41
 -4 4 -1 0.48 0.06
 -4 4 -1 0.49 0.07
 -5 5 0 10.44 0.33
 -5 5 0 10.64 0.34
 -6 6 1 5.25 0.24
 -6 6 1 5.07 0.24
 -7 7 2 12.08 0.46
 -7 7 2 12.13 0.45
 6 -5 -11 -0.03 0.07
 -5 4 10 3.2 0.22
 5 -4 -10 3.01 0.17
 -4 3 9 0.36 0.1
 -4 3 9 0.38 0.12
 4 -3 -9 0.31 0.08
 4 -3 -9 0.23 0.07
 -3 2 8 11.92 0.38
 3 -2 -8 11.19 0.33
 3 -2 -8 11.28 0.36
 3 -2 -8 11.4 0.38
 3 -2 -8 11.46 0.35
 -2 1 7 3.53 0.17
 -2 1 7 3.46 0.16
 2 -1 -7 3.38 0.16
 2 -1 -7 3.74 0.14
 2 -1 -7 3.5 0.16
 2 -1 -7 3.69 0.15
 -1 0 6 3.51 0.13
 -1 0 6 3.68 0.15
 -1 0 6 3.49 0.15
 1 0 -6 3.31 0.14
 1 0 -6 3.61 0.13
 1 0 -6 3.28 0.13
 1 0 -6 3.27 0.14
 0 -1 5 3.61 0.13
 0 -1 5 3.2 0.1
 0 -1 5 3.38 0.1
 0 1 -5 3.19 0.1
 0 1 -5 3.31 0.13
 0 1 -5 3.2 0.12
 0 1 -5 3.44 0.14
 -1 2 -4 41.14 0.95
 -1 2 -4 41.09 0.94
 -1 2 -4 41.1 0.92
 -2 3 -3 3.19 0.11
 -2 3 -3 2.99 0.11
 -2 3 -3 3.26 0.1
 -3 4 -2 0.27 0.04
 -3 4 -2 0.52 0.05
 -3 4 -2 0.33 0.06
 -4 5 -1 0.32 0.07
 -5 6 0 0.14 0.07
 -6 7 1 0.55 0.11
 -6 7 1 0.53 0.11
 -6 4 11 0.42 0.15
 6 -4 -11 0.41 0.11
 -5 3 10 0.04 0.08
 5 -3 -10 -0.03 0.05
 -4 2 9 15.75 0.5
 -4 2 9 16.62 0.54
 4 -2 -9 16.06 0.51
 4 -2 -9 15.96 0.46
 4 -2 -9 16.04 0.46
 4 -2 -9 15.6 0.52
 -3 1 8 16.07 0.47
 3 -1 -8 16.53 0.45
 3 -1 -8 16.66 0.46
 3 -1 -8 16.15 0.48
 3 -1 -8 16.4 0.49
 -2 0 7 0.14 0.05
 -2 0 7 0.03 0.04
 2 0 -7 0.01 0.03
 2 0 -7 0.02 0.03
 2 0 -7 0.08 0.05
 2 0 -7 0.07 0.04
 -1 -1 6 16.41 0.43
 -1 -1 6 15.99 0.39
 1 1 -6 16.36 0.44
 1 1 -6 16.38 0.41
 1 1 -6 15.3 0.41
 1 1 -6 15.98 0.43
 0 -2 5 9.96 0.23
 0 -2 5 9.18 0.22
 0 -2 5 9 0.19
 0 2 -5 9.25 0.27
 0 2 -5 9.67 0.28
 0 2 -5 9.06 0.23
 -1 3 -4 27.14 0.65
 -1 3 -4 28.07 0.65
 -2 4 -3 23.67 0.57
 -2 4 -3 24.92 0.58
 -4 6 -1 45.75 1.14
 -5 7 0 2.8 0.17
 -6 8 1 0.11 0.08
 -6 8 1 0.13 0.09
 -6 3 11 3.37 0.24
 6 -3 -11 2.93 0.19
 -5 2 10 0.4 0.12
 5 -2 -10 0.33 0.09
 -4 1 9 27.93 0.77
 -4 1 9 27.79 0.82
 4 -1 -9 29.09 0.78
 4 -1 -9 28.95 0.73
 4 -1 -9 29.69 0.79
 4 -1 -9 28.52 0.74
 -3 0 8 4.98 0.21
 -3 0 8 5.28 0.26
 3 0 -8 5.28 0.2
 3 0 -8 5.21 0.22
 3 0 -8 4.99 0.2
 3 0 -8 5.22 0.22
 -2 -1 7 8.44 0.28
 -2 -1 7 8.37 0.28
 -2 -1 7 8.18 0.26
 2 1 -7 7.94 0.25
 2 1 -7 7.97 0.28
 2 1 -7 7.98 0.26
 2 1 -7 8.41 0.28
 -1 -2 6 5.03 0.18
 -1 -2 6 4.68 0.14
 1 2 -6 4.44 0.16
 1 2 -6 4.4 0.16
 1 2 -6 4.46 0.18
 1 2 -6 4.69 0.18
 0 -3 5 3.65 0.1
 0 -3 5 3.91 0.11
 0 -3 5 3.52 0.08
 0 3 -5 3.77 0.15
 0 3 -5 3.56 0.15
 0 3 -5 3.42 0.11
 -1 4 -4 2.26 0.11
 -1 4 -4 2.45 0.11
 -3 6 -2 37.82 0.96
 -4 7 -1 25.39 0.71
 -5 8 0 2.39 0.17
 -6 2 11 0.65 0.15
 6 -2 -11 0.83 0.14
 -5 1 10 0.26 0.1
 5 -1 -10 0.34 0.09
 -4 0 9 -0.03 0.05
 4 0 -9 -0.01 0.05
 4 0 -9 0.06 0.05
 4 0 -9 0.06 0.07
 4 0 -9 0.02 0.05
 -3 -1 8 1.24 0.1
 -3 -1 8 1.33 0.12
 3 1 -8 1.32 0.11
 3 1 -8 1.35 0.1
 3 1 -8 1.24 0.1
 3 1 -8 1.56 0.12
 -2 -2 7 1.21 0.08
 -2 -2 7 1.07 0.12
 -2 -2 7 0.97 0.08
 2 2 -7 0.83 0.07
 2 2 -7 0.99 0.11
 2 2 -7 0.84 0.07
 2 2 -7 0.87 0.08
 -1 -3 6 0.35 0.06
 1 3 -6 0.34 0.06
 1 3 -6 0.23 0.04
 1 3 -6 0.22 0.06
 0 -4 5 4.2 0.12
 0 -4 5 3.79 0.09
 0 -4 5 4.05 0.11
 0 4 -5 3.79 0.16
 0 4 -5 3.56 0.12
 1 -5 4 4.26 0.11
 1 -5 4 4.6 0.11
 -1 5 -4 4.47 0.18
 -2 6 -3 1.79 0.12
 -3 7 -2 5.36 0.24
 -4 8 -1 -0.01 0.05
 -5 9 0 1.83 0.16
 -6 1 11 0.78 0.17
 6 -1 -11 1.37 0.18
 -5 0 10 2.97 0.19
 5 0 -10 2.7 0.17
 -4 -1 9 2.95 0.17
 4 1 -9 3.24 0.18
 4 1 -9 3.37 0.18
 4 1 -9 3.11 0.19
 4 1 -9 3.25 0.17
 -3 -2 8 0.29 0.07
 3 2 -8 0.25 0.07
 3 2 -8 0.29 0.07
 3 2 -8 0.19 0.07
 -2 -3 7 1.52 0.09
 2 3 -7 1.54 0.1
 2 3 -7 1.44 0.1
 2 3 -7 1.55 0.11
 -1 -4 6 1.04 0.05
 1 4 -6 1.03 0.09
 1 4 -6 1.02 0.07
 0 -5 5 1.56 0.06
 0 -5 5 1.76 0.08
 0 -5 5 1.47 0.04
 0 5 -5 1.88 0.08
 0 5 -5 1.58 0.11
 1 -6 4 2.79 0.08
 1 -6 4 2.77 0.08
 -1 6 -4 2.8 0.16
 -2 7 -3 2.16 0.15
 -3 8 -2 2.19 0.16
 -4 9 -1 0.15 0.08
 -6 0 11 2.51 0.2
 6 0 -11 2.5 0.18
 -5 -1 10 1.75 0.19
 5 1 -10 1.81 0.19
 -4 -2 9 0.18 0.07
 4 2 -9 0.23 0.09
 4 2 -9 0.45 0.09
 4 2 -9 0.23 0.07
 -3 -3 8 6.64 0.23
 3 3 -8 6.77 0.25
 3 3 -8 6.42 0.27
 3 3 -8 6.61 0.26
 -2 -4 7 11.01 0.3
 2 4 -7 11.12 0.34
 2 4 -7 10.6 0.36
 -1 -5 6 4.97 0.13
 -1 -5 6 4.84 0.15
 1 5 -6 4.92 0.22
 1 5 -6 4.83 0.18
 0 -6 5 0.16 0.03
 0 6 -5 0.15 0.04
 0 6 -5 0.18 0.07
 1 -7 4 15.78 0.36
 1 -7 4 17.48 0.37
 -1 7 -4 16.03 0.51
 -2 8 -3 0 0.05
 -3 9 -2 14.34 0.5
 -4 10 -1 1.59 0.21
 -6 -1 11 1.43 0.2
 6 1 -11 1.42 0.19
 -5 -2 10 3.87 0.21
 5 2 -10 3.5 0.2
 -4 -3 9 3.16 0.17
 4 3 -9 3.3 0.2
 4 3 -9 3.2 0.18
 4 3 -9 3.34 0.19
 -3 -4 8 3.17 0.15
 3 4 -8 3.39 0.19
 3 4 -8 3.34 0.17
 -2 -5 7 13.08 0.35
 2 5 -7 13.5 0.4
 2 5 -7 13.05 0.44
 -1 -6 6 22.13 0.52
 -1 -6 6 22.2 0.46
 1 6 -6 22.3 0.57
 1 6 -6 22.15 0.64
 0 -7 5 2.14 0.08
 0 7 -5 1.85 0.1
 0 7 -5 2.01 0.15
 1 -8 4 1.73 0.06
 -1 8 -4 1.91 0.15
 -2 9 -3 0.1 0.08
 -3 10 -2 12.26 0.47
 -6 -2 11 0.42 0.12
 6 2 -11 0.43 0.12
 -5 -3 10 10.72 0.37
 5 3 -10 11.18 0.4
 -4 -4 9 11.62 0.36
 4 4 -9 11.89 0.43
 4 4 -9 11.17 0.39
 4 4 -9 11.38 0.4
 -3 -5 8 1.44 0.1
 3 5 -8 1.54 0.14
 3 5 -8 1.52 0.12
 -2 -6 7 7.62 0.2
 -2 -6 7 7.97 0.23
 2 6 -7 7.5 0.28
 2 6 -7 7.27 0.31
 -1 -7 6 0.5 0.04
 -1 -7 6 0.6 0.07
 1 7 -6 0.45 0.07
 1 7 -6 0.49 0.12
 0 -8 5 0.43 0.04
 0 8 -5 0.39 0.06
 0 8 -5 0.47 0.11
 -1 9 -4 0.33 0.11
 -2 10 -3 3.18 0.22
 -6 -3 11 0.01 0.08
 6 3 -11 -0.09 0.07
 -5 -4 10 -0.05 0.07
 5 4 -10 -0.1 0.07
 -4 -5 9 0.46 0.09
 4 5 -9 0.49 0.13
 4 5 -9 0.41 0.1
 -3 -6 8 0.19 0.06
 3 6 -8 0.08 0.08
 3 6 -8 0.06 0.06
 -2 -7 7 0.05 0.03
 -2 -7 7 0.02 0.04
 2 7 -7 0.09 0.08
 2 7 -7 0.54 0.1
 -1 -8 6 1.83 0.06
 -1 -8 6 1.75 0.08
 1 8 -6 1.83 0.12
 1 8 -6 1.88 0.16
 0 -9 5 0.1 0.04
 0 9 -5 0.08 0.05
 0 9 -5 0.23 0.1
 -1 10 -4 2.95 0.14
 -1 10 -4 3.14 0.22
 -5 -5 10 1.48 0.13
 -4 -6 9 2.7 0.15
 4 6 -9 2.41 0.22
 4 6 -9 2.42 0.18
 -3 -7 8 0.43 0.08
 -3 -7 8 0.47 0.06
 3 7 -8 0.53 0.11
 3 7 -8 1.37 0.19
 -2 -8 7 0.03 0.03
 -2 -8 7 0.03 0.04
 2 8 -7 0.06 0.05
 2 8 -7 0.01 0.07
 -1 -9 6 0.01 0.04
 1 9 -6 0.01 0.08
 1 9 -6 0.06 0.05
 0 -10 5 2.66 0.09
 0 10 -5 2.7 0.21
 0 10 -5 2.44 0.14
 -4 -7 9 1.25 0.11
 4 7 -9 1.74 0.19
 -3 -8 8 0.04 0.04
 -3 -8 8 0.08 0.06
 3 8 -8 -0.03 0.09
 3 8 -8 0.09 0.08
 -2 -9 7 0.3 0.07
 -2 -9 7 0.29 0.04
 2 9 -7 0.12 0.1
 2 9 -7 0.22 0.08
 -1 -10 6 -0.03 0.04
 1 10 -6 0.04 0.09
 6 12 0 1.13 0.18
 -6 -12 0 1.09 0.14
 -6 -12 0 1.21 0.12
 7 11 -1 2.13 0.18
 8 10 -2 0.67 0.14
 4 13 2 4.47 0.26
 -4 -13 -2 4.23 0.19
 -4 -13 -2 4.19 0.17
 5 12 1 0.15 0.1
 -5 -12 -1 0.08 0.07
 -5 -12 -1 0.07 0.06
 6 11 0 13.12 0.46
 7 10 -1 21.07 0.63
 -7 -10 1 21.51 0.65
 8 9 -2 0.31 0.1
 -8 -9 2 0.29 0.1
 -8 -9 2 0.29 0.1
 9 8 -3 2.38 0.16
 -9 -8 3 2.22 0.18
 -9 -8 3 2.12 0.17
 3 13 3 0.06 0.1
 -3 -13 -3 0.09 0.05
 -3 -13 -3 0.17 0.08
 4 12 2 -0.04 0.07
 -4 -12 -2 0.14 0.06
 -4 -12 -2 0.14 0.08
 5 11 1 0.83 0.15
 -5 -11 -1 0.89 0.1
 -5 -11 -1 0.93 0.12
 6 10 0 0.94 0.15
 -6 -10 0 1.06 0.15
 -6 -10 0 1.29 0.15
 7 9 -1 1.57 0.14
 -7 -9 1 1.77 0.15
 -7 -9 1 1.57 0.13
 8 8 -2 2.55 0.16
 -8 -8 2 2.74 0.18
 -8 -8 2 2.67 0.18
 9 7 -3 1 0.13
 -9 -7 3 1.07 0.17
 -9 -7 3 0.96 0.16
 2 13 4 1.36 0.2
 -2 -13 -4 1.28 0.11
 -2 -13 -4 1.27 0.13
 3 12 3 9 0.36
 -3 -12 -3 8.52 0.28
 -3 -12 -3 8.18 0.24
 4 11 2 7.02 0.3
 -4 -11 -2 6.66 0.24
 -4 -11 -2 6.81 0.21
 5 10 1 8.59 0.33
 -5 -10 -1 8.5 0.28
 -5 -10 -1 8.4 0.32
 -5 -10 -1 8.56 0.31
 6 9 0 17.65 0.53
 -6 -9 0 17.58 0.53
 -6 -9 0 18.07 0.52
 7 8 -1 1.01 0.13
 -7 -8 1 1.17 0.15
 -7 -8 1 1.05 0.13
 8 7 -2 0.75 0.11
 -8 -7 2 0.63 0.12
 -8 -7 2 0.57 0.11
 9 6 -3 0.85 0.11
 -9 -6 3 1.01 0.16
 -9 -6 3 0.95 0.15
 1 13 5 0.24 0.11
 -1 -13 -5 0.18 0.08
 2 12 4 1.29 0.18
 -2 -12 -4 1.12 0.12
 -2 -12 -4 0.93 0.09
 3 11 3 0.49 0.12
 -3 -11 -3 0.59 0.09
 -3 -11 -3 0.72 0.09
 4 10 2 20.7 0.59
 -4 -10 -2 21.03 0.48
 -4 -10 -2 20.55 0.53
 -4 -10 -2 20.19 0.58
 -4 -10 -2 20.44 0.57
 5 9 1 21.17 0.59
 -5 -9 -1 21.24 0.54
 -5 -9 -1 21.12 0.59
 -5 -9 -1 20.95 0.58
 6 8 0 15.17 0.46
 -6 -8 0 15.95 0.47
 -6 -8 0 15.91 0.47
 7 7 -1 21.04 0.58
 -7 -7 1 22.6 0.63
 -7 -7 1 22.68 0.62
 8 6 -2 0.06 0.05
 -8 -6 2 0.14 0.08
 -8 -6 2 0.13 0.07
 9 5 -3 0.1 0.05
 -9 -5 3 0.06 0.07
 -9 -5 3 0.11 0.08
 10 4 -4 4.73 0.15
 -10 -4 4 5.07 0.27
 -10 -4 4 5.14 0.29
 0 13 6 0.12 0.11
 0 -13 -6 0.23 0.09
 1 12 5 0.35 0.12
 -1 -12 -5 0.22 0.07
 2 11 4 10.01 0.37
 -2 -11 -4 9.58 0.26
 -2 -11 -4 10.14 0.3
 3 10 3 1.73 0.14
 -3 -10 -3 2.04 0.13
 -3 -10 -3 1.92 0.1
 -3 -10 -3 1.89 0.12
 -3 -10 -3 1.93 0.11
 4 9 2 17.83 0.52
 -4 -9 -2 18.21 0.47
 -4 -9 -2 18.06 0.5
 -4 -9 -2 18.63 0.43
 -4 -9 -2 17.25 0.51
 5 8 1 71.52 1.61
 -5 -8 -1 69.36 1.65
 -5 -8 -1 69.42 1.55
 -5 -8 -1 71.94 1.62
 6 7 0 92.06 2.01
 -6 -7 0 88.94 2.03
 -6 -7 0 90.46 2.1
 7 6 -1 17.09 0.47
 -7 -6 1 17.62 0.52
 -7 -6 1 17.17 0.5
 8 5 -2 34.15 0.81
 -8 -5 2 34.88 0.89
 -8 -5 2 34.35 0.93
 9 4 -3 0.81 0.08
 -9 -4 3 0.66 0.12
 -9 -4 3 0.85 0.15
 -10 -3 4 2.38 0.19
 -10 -3 4 2.57 0.21
 0 12 6 0.16 0.1
 0 -12 -6 0.17 0.08
 1 11 5 3.99 0.16
 1 11 5 4.05 0.22
 -1 -11 -5 3.77 0.14
 -1 -11 -5 4.03 0.16
 2 10 4 0.39 0.06
 2 10 4 0.38 0.1
 -2 -10 -4 0.72 0.07
 -2 -10 -4 0.55 0.08
 -2 -10 -4 0.5 0.09
 -2 -10 -4 0.4 0.07
 3 9 3 4.27 0.16
 3 9 3 4.36 0.2
 -3 -9 -3 4.44 0.19
 -3 -9 -3 4.48 0.15
 -3 -9 -3 4.52 0.18
 -3 -9 -3 4.07 0.16
 4 8 2 2.55 0.14
 4 8 2 2.6 0.13
 -4 -8 -2 2.44 0.13
 -4 -8 -2 2.48 0.12
 -4 -8 -2 2.72 0.14
 5 7 1 3.11 0.15
 -5 -7 -1 2.97 0.13
 -5 -7 -1 2.95 0.14
 -5 -7 -1 2.46 0.14
 6 6 0 2.69 0.14
 -6 -6 0 3.23 0.16
 -6 -6 0 3.48 0.16
 7 5 -1 2.68 0.12
 -7 -5 1 2.36 0.15
 -7 -5 1 2.59 0.15
 8 4 -2 1 0.07
 -8 -4 2 1.1 0.15
 -8 -4 2 0.93 0.15
 -9 -3 3 1.53 0.19
 -10 -2 4 0.51 0.13
 -1 12 7 0.23 0.11
 1 -12 -7 0.32 0.09
 0 11 6 4.84 0.25
 0 -11 -6 4.92 0.2
 1 10 5 4.79 0.23
 1 10 5 4.59 0.17
 -1 -10 -5 4.74 0.15
 -1 -10 -5 4.61 0.17
 2 9 4 0.59 0.1
 2 9 4 0.51 0.06
 -2 -9 -4 0.55 0.07
 -2 -9 -4 0.56 0.09
 -2 -9 -4 0.46 0.07
 -2 -9 -4 0.46 0.06
 3 8 3 1.31 0.08
 3 8 3 1.49 0.1
 3 8 3 1.3 0.11
 -3 -8 -3 1.38 0.08
 -3 -8 -3 1.33 0.09
 -3 -8 -3 1.29 0.07
 -3 -8 -3 1.35 0.1
 4 7 2 1.79 0.08
 4 7 2 1.56 0.11
 4 7 2 1.54 0.1
 -4 -7 -2 1.75 0.11
 -4 -7 -2 1.69 0.1
 -4 -7 -2 1.75 0.09
 -5 -6 -1 3.38 0.15
 -5 -6 -1 3.27 0.15
 -5 -6 -1 3.47 0.14
 6 5 0 9.84 0.28
 -6 -5 0 9.72 0.32
 -6 -5 0 9.53 0.3
 7 4 -1 2.56 0.11
 -7 -4 1 2.73 0.15
 -7 -4 1 2.92 0.16
 8 3 -2 7.74 0.19
 8 3 -2 7.1 0.18
 -8 -3 2 6.93 0.28
 -9 -2 3 6.15 0.28
 -10 -1 4 8.31 0.37
 -1 11 7 0.78 0.16
 1 -11 -7 0.7 0.12
 0 10 6 7.65 0.31
 0 -10 -6 7.9 0.25
 1 9 5 1.34 0.15
 1 9 5 0.82 0.06
 1 9 5 0.94 0.13
 -1 -9 -5 1.15 0.12
 -1 -9 -5 0.86 0.07
 -1 -9 -5 0.86 0.07
 -1 -9 -5 0.74 0.06
 2 8 4 11.01 0.37
 2 8 4 11.21 0.3
 2 8 4 10.62 0.34
 -2 -8 -4 11.34 0.33
 -2 -8 -4 11.09 0.3
 -2 -8 -4 11.69 0.33
 -2 -8 -4 11.11 0.27
 3 7 3 0.74 0.05
 3 7 3 0.83 0.1
 3 7 3 0.76 0.07
 -3 -7 -3 0.73 0.07
 -3 -7 -3 0.78 0.06
 -3 -7 -3 0.68 0.05
 -3 -7 -3 0.69 0.06
 4 6 2 0.32 0.03
 4 6 2 0.41 0.06
 -4 -6 -2 0.47 0.07
 -4 -6 -2 0.44 0.06
 -4 -6 -2 0.43 0.06
 5 5 1 27.96 0.64
 5 5 1 27.76 0.65
 -5 -5 -1 26.62 0.66
 -5 -5 -1 27.18 0.65
 -5 -5 -1 26.63 0.68
 6 4 0 5.21 0.17
 6 4 0 5.13 0.16
 -6 -4 0 5.4 0.2
 -6 -4 0 5.18 0.21
 7 3 -1 2.96 0.08
 7 3 -1 2.69 0.08
 -7 -3 1 2.51 0.15
 -8 -2 2 5.87 0.25
 -9 -1 3 0 0.06
 -10 0 4 5.21 0.29
 2 -11 -8 0 0.06
 -1 10 7 8.28 0.34
 1 -10 -7 7.74 0.27
 0 9 6 4.7 0.23
 0 9 6 4.73 0.24
 0 -9 -6 5.17 0.2
 0 -9 -6 5.09 0.18
 0 -9 -6 5.35 0.22
 1 8 5 2.8 0.15
 -1 -8 -5 2.83 0.1
 -1 -8 -5 3.03 0.14
 -1 -8 -5 3.15 0.13
 -1 -8 -5 2.99 0.12
 2 7 4 18.88 0.45
 2 7 4 19.2 0.5
 2 7 4 19.47 0.53
 -2 -7 -4 18.75 0.48
 -2 -7 -4 18.68 0.49
 -2 -7 -4 18.58 0.42
 -2 -7 -4 18.53 0.45
 3 6 3 0.58 0.08
 3 6 3 0.45 0.03
 -3 -6 -3 0.46 0.06
 -3 -6 -3 0.46 0.05
 -3 -6 -3 0.49 0.05
 4 5 2 3.45 0.13
 -4 -5 -2 3.81 0.14
 -4 -5 -2 3.63 0.14
 -4 -5 -2 3.71 0.14
 -4 -5 -2 3.9 0.13
 5 4 1 2.64 0.09
 5 4 1 3.01 0.1
 -5 -4 -1 2.52 0.12
 -5 -4 -1 2.64 0.12
 -5 -4 -1 2.81 0.11
 -6 -3 0 2.15 0.12
 -7 -2 1 2.06 0.13
 -8 -1 2 1.39 0.16
 -9 0 3 0.36 0.1
 -2 10 8 3.5 0.23
 2 -10 -8 3.39 0.17
 -1 9 7 3.03 0.19
 -1 9 7 2.93 0.2
 -1 9 7 2.91 0.2
 1 -9 -7 2.98 0.15
 0 8 6 4.19 0.21
 0 8 6 4.22 0.2
 0 8 6 3.75 0.2
 0 -8 -6 3.86 0.15
 0 -8 -6 3.9 0.16
 0 -8 -6 3.33 0.16
 1 7 5 4.61 0.19
 1 7 5 4.83 0.2
 -1 -7 -5 4.55 0.16
 -1 -7 -5 4.79 0.14
 -1 -7 -5 4.57 0.15
 -1 -7 -5 4.58 0.17
 2 6 4 6.91 0.18
 2 6 4 6.94 0.23
 2 6 4 6.25 0.21
 -2 -6 -4 6.54 0.21
 -2 -6 -4 6.7 0.19
 -2 -6 -4 6.9 0.21
 -2 -6 -4 6.88 0.17
 -2 -6 -4 6.8 0.21
 -2 -6 -4 6.7 0.19
 -3 -5 -3 1.86 0.08
 -3 -5 -3 1.82 0.08
 -3 -5 -3 1.93 0.09
 -3 -5 -3 1.72 0.08
 -3 -5 -3 1.88 0.07
 4 4 2 0 0.02
 4 4 2 0.02 0.02
 -4 -4 -2 -0.01 0.01
 -4 -4 -2 0 0.02
 -4 -4 -2 0.02 0.02
 -4 -4 -2 0 0.01
 -5 -3 -1 1.01 0.07
 -5 -3 -1 1.07 0.05
 -5 -3 -1 1.02 0.07
 -6 -2 0 0.88 0.09
 -6 -2 0 0.6 0.05
 -7 -1 1 1.19 0.13
 -8 0 2 0.97 0.14
 -9 1 3 0.12 0.08
 3 -10 -9 5.56 0.25
 -2 9 8 2.12 0.24
 2 -9 -8 1.36 0.11
 -1 8 7 27.46 0.8
 -1 8 7 28.87 0.76
 -1 8 7 28.97 0.79
 1 -8 -7 28.41 0.69
 1 -8 -7 28.38 0.74
 1 -8 -7 28.13 0.75
 0 7 6 8.68 0.3
 0 -7 -6 9.14 0.28
 0 -7 -6 8.9 0.25
 0 -7 -6 8.85 0.29
 1 6 5 12.63 0.38
 1 6 5 12.29 0.36
 -1 -6 -5 12.7 0.35
 -1 -6 -5 12.49 0.34
 -1 -6 -5 12.84 0.34
 -1 -6 -5 12.91 0.29
 -1 -6 -5 12.66 0.31
 2 5 4 26.41 0.61
 2 5 4 26.32 0.58
 -2 -5 -4 25.86 0.62
 -2 -5 -4 25.9 0.54
 -2 -5 -4 26.11 0.58
 -2 -5 -4 25.26 0.61
 -2 -5 -4 25.73 0.61
 3 4 3 21.86 0.49
 3 4 3 20.81 0.49
 -3 -4 -3 21.73 0.52
 -3 -4 -3 21.82 0.5
 -3 -4 -3 22.64 0.49
 -3 -4 -3 21.96 0.51
 -4 -3 -2 90.51 1.99
 -4 -3 -2 85.84 1.98
 -6 -1 0 20.28 0.52
 -6 -1 0 21.18 0.47
 -7 0 1 12.46 0.39
 -8 1 2 0.05 0.06
 -9 2 3 0.37 0.11
 -3 9 9 8.13 0.37
 3 -9 -9 8.05 0.3
 -2 8 8 15.23 0.5
 -2 8 8 15.63 0.53
 -2 8 8 15.16 0.53
 2 -8 -8 15.14 0.43
 -1 7 7 10.33 0.39
 -1 7 7 11.08 0.38
 -1 7 7 11.13 0.37
 1 -7 -7 11.71 0.32
 1 -7 -7 10.79 0.36
 1 -7 -7 11 0.35
 1 -7 -7 11.14 0.34
 0 6 6 0.3 0.07
 0 6 6 0.28 0.07
 0 -6 -6 0.21 0.04
 0 -6 -6 0.21 0.04
 0 -6 -6 0.28 0.06
 0 -6 -6 0.34 0.05
 1 5 5 30.09 0.73
 1 5 5 29.31 0.75
 1 5 5 29.32 0.71
 1 5 5 31.16 0.66
 -1 -5 -5 29.95 0.7
 -1 -5 -5 29.66 0.62
 -1 -5 -5 31.01 0.66
 -1 -5 -5 29.3 0.71
 -1 -5 -5 29.53 0.71
 -2 -4 -4 24.1 0.57
 -2 -4 -4 23.89 0.55
 -2 -4 -4 23.48 0.49
 -2 -4 -4 24.04 0.55
 -3 -3 -3 74.61 1.67
 -3 -3 -3 73.52 1.67
 -4 -2 -2 13.24 0.32
 -4 -2 -2 13.31 0.33
 -5 -1 -1 84.05 1.82
 -5 -1 -1 85.74 1.88
 -5 -1 -1 82.3 1.83
 -6 0 0 0.19 0.05
 -7 1 1 26.32 0.69
 -8 2 2 8.64 0.34
 -9 3 3 0.69 0.14
 4 -9 -10 1.44 0.17
 -3 8 9 0.53 0.13
 3 -8 -9 0.54 0.1
 -2 7 8 48 1.17
 -2 7 8 45.87 1.2
 2 -7 -8 47.07 1.18
 2 -7 -8 47.68 1.1
 2 -7 -8 47.66 1.13
 -1 6 7 26.71 0.71
 1 -6 -7 26.79 0.7
 1 -6 -7 27.74 0.7
 1 -6 -7 27.49 0.68
 1 -6 -7 27.35 0.65
 0 5 6 6.96 0.25
 0 5 6 7.28 0.24
 0 5 6 7.12 0.18
 0 -5 -6 6.86 0.22
 0 -5 -6 7.32 0.2
 0 -5 -6 7.02 0.22
 0 -5 -6 6.57 0.23
 1 4 5 47.89 1.07
 1 4 5 48.95 1.1
 1 4 5 48.97 1.04
 -1 -4 -5 47.52 1.07
 -1 -4 -5 48.91 1.1
 -1 -4 -5 47.17 1.08
 -1 -4 -5 47.52 1.03
 -1 -4 -5 48.59 0.96
 2 3 4 18.27 0.39
 -2 -3 -4 18.2 0.39
 -2 -3 -4 17.55 0.45
 -2 -3 -4 17.15 0.4
 -3 -2 -3 11.72 0.28
 -3 -2 -3 12.01 0.28
 -3 -2 -3 11.55 0.27
 -4 -1 -2 0.07 0.01
 -4 -1 -2 0.08 0.01
 -4 -1 -2 0.04 0.02
 -5 0 -1 0.52 0.06
 -5 0 -1 0.55 0.06
 -5 0 -1 0.5 0.04
 -5 0 -1 0.47 0.04
 -6 1 0 1.99 0.1
 -7 2 1 9.04 0.32
 -8 3 2 0.06 0.06
 -9 4 3 1.98 0.24
 -4 8 10 0 0.09
 4 -8 -10 -0.07 0.06
 -3 7 9 2.96 0.2
 3 -7 -9 2.83 0.16
 -2 6 8 21.92 0.62
 -2 6 8 21.56 0.65
 2 -6 -8 22.46 0.63
 2 -6 -8 21.27 0.56
 2 -6 -8 22.25 0.58
 2 -6 -8 22.09 0.61
 -1 5 7 15.13 0.46
 -1 5 7 14.83 0.44
 1 -5 -7 15.5 0.4
 1 -5 -7 15.21 0.44
 1 -5 -7 15.32 0.42
 1 -5 -7 15.13 0.43
 0 4 6 21.54 0.55
 0 4 6 22.26 0.46
 0 4 6 22.38 0.57
 0 -4 -6 21.28 0.54
 0 -4 -6 22 0.54
 0 -4 -6 21.93 0.51
 0 -4 -6 21.02 0.54
 1 3 5 23.29 0.57
 -1 -3 -5 24.25 0.57
 -1 -3 -5 23.29 0.55
 -1 -3 -5 23.09 0.55
 -1 -3 -5 23.76 0.55
 -1 -3 -5 23.92 0.48
 -2 -2 -4 10.23 0.25
 -2 -2 -4 9.93 0.24
 -3 -1 -3 0.27 0.01
 -4 0 -2 7.56 0.19
 -4 0 -2 7.71 0.19
 -5 1 -1 3.23 0.12
 -5 1 -1 3.29 0.13
 -5 1 -1 3.19 0.11
 -5 1 -1 3.11 0.11
 -6 2 0 1.29 0.09
 -6 2 0 1.16 0.09
 -7 3 1 6.4 0.27
 -7 3 1 6.9 0.27
 -8 4 2 -0.01 0.06
 -4 7 10 0.47 0.14
 4 -7 -10 0.58 0.11
 -3 6 9 3.11 0.2
 -3 6 9 3.53 0.23
 3 -6 -9 2.9 0.16
 -2 5 8 0.04 0.06
 -2 5 8 0.07 0.06
 2 -5 -8 0.06 0.05
 2 -5 -8 0 0.04
 2 -5 -8 0 0.03
 2 -5 -8 0.06 0.05
 -1 4 7 10.24 0.35
 -1 4 7 11.11 0.34
 1 -4 -7 12.49 0.35
 1 -4 -7 10.79 0.3
 1 -4 -7 10.89 0.32
 1 -4 -7 10.19 0.32
 0 3 6 97.38 2.07
 0 3 6 94.7 1.88
 0 3 6 99.55 2.13
 0 -3 -6 94.29 2.09
 0 -3 -6 95.86 2.1
 0 -3 -6 92.63 2.16
 0 -3 -6 96.55 2.03
 1 2 5 7.77 0.18
 1 2 5 7.44 0.19
 -1 -2 -5 7.23 0.19
 -1 -2 -5 7.57 0.22
 -1 -2 -5 7.87 0.22
 -1 -2 -5 7.5 0.17
 -2 -1 -4 107.91 2.33
 -2 -1 -4 107.04 2.51
 -2 -1 -4 108.86 2.32
 -4 1 -2 3.83 0.11
 -5 2 -1 4.55 0.15
 -5 2 -1 4.51 0.14
 -5 2 -1 4.67 0.15
 -5 2 -1 4.62 0.16
 -6 3 0 3.56 0.16
 -6 3 0 3.36 0.16
 -7 4 1 4.57 0.22
 -7 4 1 4.35 0.22
 -8 5 2 2.27 0.18
 5 -7 -11 0.09 0.08
 -4 6 10 0.99 0.18
 4 -6 -10 0.89 0.13
 -3 5 9 11.88 0.41
 -3 5 9 11.56 0.43
 3 -5 -9 11.1 0.36
 3 -5 -9 11.09 0.4
 3 -5 -9 11.55 0.35
 -2 4 8 32.14 0.83
 2 -4 -8 33.79 0.81
 2 -4 -8 32.51 0.84
 2 -4 -8 33.09 0.79
 2 -4 -8 33.42 0.85
 -1 3 7 3.48 0.1
 -1 3 7 3.49 0.17
 -1 3 7 3.3 0.15
 1 -3 -7 3.64 0.14
 1 -3 -7 3.3 0.15
 1 -3 -7 3.35 0.14
 1 -3 -7 3.54 0.16
 0 2 6 15.24 0.4
 0 2 6 14.87 0.3
 0 2 6 13.56 0.37
 0 -2 -6 13.92 0.37
 0 -2 -6 14.69 0.35
 0 -2 -6 14.08 0.38
 0 -2 -6 14.72 0.39
 1 1 5 48.57 0.99
 -1 -1 -5 48.35 1.01
 -1 -1 -5 46.39 1.06
 -1 -1 -5 45.88 1.01
 -2 0 -4 16.75 0.38
 -2 0 -4 17.03 0.39
 -3 1 -3 59.44 1.27
 -4 2 -2 0.37 0.03
 -4 2 -2 0.33 0.03
 -4 2 -2 0.28 0.03
 -5 3 -1 14.56 0.38
 -5 3 -1 14.19 0.35
 -5 3 -1 14.18 0.39
 -6 4 0 0.88 0.09
 -6 4 0 1.16 0.13
 -7 5 1 -0.02 0.05
 -7 5 1 0.02 0.05
 -8 6 2 0.31 0.11
 -8 6 2 0.34 0.11
 -5 6 11 1.43 0.23
 5 -6 -11 1.32 0.17
 -4 5 10 5.6 0.28
 4 -5 -10 5.56 0.23
 -3 4 9 8.88 0.35
 -3 4 9 9.79 0.38
 3 -4 -9 9.74 0.34
 3 -4 -9 9.21 0.3
 3 -4 -9 9.35 0.35
 3 -4 -9 9.19 0.31
 -2 3 8 33.72 0.89
 -2 3 8 33.95 0.85
 2 -3 -8 33.57 0.86
 2 -3 -8 34.76 0.83
 2 -3 -8 33.82 0.81
 2 -3 -8 34.86 0.87
 -1 2 7 15.15 0.44
 -1 2 7 15.32 0.33
 -1 2 7 15 0.41
 1 -2 -7 15 0.41
 1 -2 -7 15.75 0.42
 1 -2 -7 14.86 0.42
 0 1 6 20.78 0.53
 0 1 6 21.68 0.42
 0 -1 -6 20.2 0.5
 0 -1 -6 21.27 0.54
 0 -1 -6 20.74 0.52
 0 -1 -6 21.06 0.52
 -1 0 -5 91.12 1.99
 -1 0 -5 91.93 2.08
 -2 1 -4 18.36 0.41
 -2 1 -4 17.56 0.41
 -2 1 -4 17.22 0.4
 -2 1 -4 17.45 0.4
 -3 2 -3 0.6 0.04
 -3 2 -3 0.61 0.03
 -3 2 -3 0.64 0.03
 -4 3 -2 14.8 0.39
 -4 3 -2 15.58 0.37
 -4 3 -2 15.56 0.37
 -5 4 -1 5.87 0.21
 -6 5 0 1.4 0.11
 -6 5 0 1.49 0.12
 -7 6 1 0.13 0.08
 -7 6 1 0.09 0.07
 -5 5 11 0.15 0.11
 5 -5 -11 -0.01 0.07
 -4 4 10 17.9 0.57
 4 -4 -10 17.69 0.5
 -3 3 9 0.09 0.07
 -3 3 9 0.14 0.07
 3 -3 -9 0.11 0.06
 3 -3 -9 0.01 0.04
 3 -3 -9 0.04 0.06
 3 -3 -9 0.04 0.04
 -2 2 8 1.69 0.13
 -2 2 8 1.56 0.11
 2 -2 -8 1.7 0.11
 2 -2 -8 1.64 0.12
 2 -2 -8 1.7 0.1
 2 -2 -8 1.61 0.11
 -1 1 7 183.42 3.85
 -1 1 7 186.88 3.89
 1 -1 -7 172.79 3.86
 1 -1 -7 176.44 3.9
 1 -1 -7 180.75 3.83
 1 -1 -7 175.08 4.04
 0 0 6 61.67 1.2
 0 0 6 61.56 1.37
 0 0 6 68.36 1.31
 0 0 6 59.31 1.31
 0 0 -6 61.17 1.37
 0 0 -6 59.62 1.39
 0 0 -6 60.04 1.34
 0 0 -6 59.8 1.41
 -1 1 -5 137.52 3.24
 -1 1 -5 147.39 3.08
 -1 1 -5 145.92 3.73
 -2 2 -4 0.85 0.04
 -2 2 -4 0.93 0.05
 -2 2 -4 0.87 0.05
 -3 3 -3 24.05 0.54
 -3 3 -3 22.9 0.57
 -3 3 -3 23.62 0.54
 -4 4 -2 2.13 0.09
 -4 4 -2 1.93 0.1
 -5 5 -1 2 0.13
 -6 6 0 0.33 0.09
 -6 6 0 0.26 0.08
 -7 7 1 5.43 0.27
 -7 7 1 5.31 0.27
 -5 4 11 1.38 0.21
 5 -4 -11 1.41 0.17
 -4 3 10 5.05 0.26
 4 -3 -10 5.37 0.23
 4 -3 -10 5.35 0.23
 -3 2 9 26.34 0.71
 3 -2 -9 26.83 0.69
 3 -2 -9 26.32 0.67
 3 -2 -9 27.2 0.73
 3 -2 -9 26.48 0.72
 -2 1 8 7.75 0.29
 -2 1 8 7.4 0.26
 2 -1 -8 7.37 0.26
 2 -1 -8 7.6 0.26
 2 -1 -8 7.56 0.24
 2 -1 -8 7.71 0.28
 -1 0 7 2.32 0.13
 -1 0 7 2.33 0.11
 1 0 -7 2.55 0.12
 1 0 -7 2.61 0.11
 1 0 -7 2.19 0.11
 1 0 -7 2.55 0.13
 0 -1 6 22.51 0.49
 0 -1 6 22.23 0.49
 0 -1 6 22.26 0.44
 0 1 -6 22.08 0.55
 0 1 -6 21.29 0.51
 0 1 -6 21.63 0.56
 0 1 -6 22.13 0.55
 -1 2 -5 203.83 4.26
 -1 2 -5 184.36 4.39
 -1 2 -5 200.41 4.4
 -2 3 -4 134.04 2.9
 -2 3 -4 134.22 3.01
 -2 3 -4 134.68 3.03
 -3 4 -3 9.2 0.25
 -3 4 -3 8.64 0.27
 -3 4 -3 9.03 0.24
 -4 5 -2 28.01 0.72
 -5 6 -1 2.7 0.16
 -6 7 0 1.43 0.17
 -6 7 0 1.35 0.17
 -5 3 11 1.1 0.19
 5 -3 -11 1.24 0.16
 -4 2 10 29.74 0.81
 4 -2 -10 29.53 0.76
 4 -2 -10 29.22 0.77
 -3 1 9 16.09 0.48
 3 -1 -9 15.89 0.49
 3 -1 -9 16.27 0.47
 3 -1 -9 15.52 0.48
 3 -1 -9 15.96 0.45
 -2 0 8 4.22 0.19
 -2 0 8 3.86 0.19
 -2 0 8 3.97 0.17
 2 0 -8 3.97 0.19
 2 0 -8 4.04 0.17
 2 0 -8 3.92 0.16
 2 0 -8 4.15 0.18
 -1 -1 7 45.32 1.04
 1 1 -7 44.62 1.05
 1 1 -7 42.48 1.02
 1 1 -7 45.6 1.01
 1 1 -7 44.46 1.07
 0 -2 6 1.46 0.04
 0 -2 6 1.59 0.06
 0 -2 6 1.61 0.06
 0 2 -6 1.68 0.09
 0 2 -6 1.58 0.1
 0 2 -6 1.48 0.07
 0 2 -6 1.58 0.09
 -1 3 -5 39.03 0.9
 -1 3 -5 38.76 0.92
 -2 4 -4 0.2 0.04
 -3 5 -3 0.03 0.03
 -4 6 -2 11.94 0.38
 -5 7 -1 0.91 0.13
 -6 8 0 4.62 0.24
 -6 8 0 4.77 0.25
 -6 3 12 4.47 0.28
 6 -3 -12 4.38 0.24
 -5 2 11 2.05 0.18
 5 -2 -11 2.21 0.16
 -4 1 10 19.78 0.58
 4 -1 -10 19.93 0.56
 4 -1 -10 19.41 0.59
 4 -1 -10 18.55 0.58
 4 -1 -10 18.34 0.53
 -3 0 9 0.41 0.09
 3 0 -9 0.26 0.07
 3 0 -9 0.3 0.09
 3 0 -9 0.37 0.09
 3 0 -9 0.36 0.08
 -2 -1 8 9.64 0.29
 2 1 -8 9.31 0.32
 2 1 -8 10.04 0.31
 2 1 -8 10.22 0.3
 2 1 -8 9.76 0.33
 1 2 -7 0.06 0.03
 1 2 -7 0.08 0.04
 1 2 -7 0.03 0.04
 1 2 -7 0.02 0.03
 0 -3 6 6.93 0.17
 0 -3 6 7.22 0.18
 0 3 -6 6.49 0.19
 0 3 -6 7.29 0.24
 -3 6 -3 4.83 0.21
 -4 7 -2 4.92 0.23
 -5 8 -1 0.6 0.12
 -6 2 12 0.34 0.13
 6 -2 -12 0.47 0.13
 -5 1 11 0.17 0.1
 5 -1 -11 0.23 0.09
 -4 0 10 1.67 0.19
 4 0 -10 1.27 0.17
 4 0 -10 1.57 0.17
 4 0 -10 1.39 0.17
 4 0 -10 1.28 0.15
 -3 -1 9 3.93 0.18
 3 1 -9 3.92 0.2
 3 1 -9 3.88 0.19
 3 1 -9 4.32 0.19
 3 1 -9 3.76 0.2
 -2 -2 8 0.04 0.03
 2 2 -8 0.07 0.05
 2 2 -8 0.04 0.04
 2 2 -8 0.04 0.04
 2 2 -8 0.02 0.05
 1 3 -7 0.17 0.04
 1 3 -7 0.08 0.04
 0 -4 6 5.45 0.14
 0 -4 6 5.74 0.16
 0 4 -6 5.41 0.17
 0 4 -6 5.14 0.21
 -1 5 -5 4.96 0.2
 -2 6 -4 0.43 0.08
 -3 7 -3 5.62 0.25
 -4 8 -2 2.34 0.17
 -5 9 -1 2.05 0.17
 -6 1 12 1.56 0.23
 6 -1 -12 1.45 0.2
 -5 0 11 0.4 0.12
 5 0 -11 0.32 0.11
 -4 -1 10 0.16 0.08
 4 1 -10 0.05 0.07
 4 1 -10 0.04 0.05
 4 1 -10 0.04 0.07
 4 1 -10 0.16 0.07
 -3 -2 9 0.72 0.1
 3 2 -9 0.58 0.09
 3 2 -9 0.81 0.13
 3 2 -9 0.69 0.11
 3 2 -9 0.96 0.12
 -2 -3 8 0.05 0.04
 2 3 -8 0.09 0.06
 2 3 -8 0.06 0.04
 -1 -4 7 2.57 0.1
 -1 -4 7 2.48 0.08
 1 4 -7 2.41 0.14
 1 4 -7 2.71 0.13
 0 -5 6 5.38 0.14
 0 5 -6 5.3 0.22
 0 5 -6 5.14 0.17
 -1 6 -5 13.96 0.44
 -2 7 -4 1.14 0.14
 -3 8 -3 1.29 0.17
 -4 9 -2 0.74 0.14
 -6 0 12 0.84 0.16
 6 0 -12 0.82 0.15
 -5 -1 11 19.02 0.58
 5 1 -11 19.77 0.58
 -4 -2 10 9.61 0.33
 4 2 -10 9.36 0.37
 4 2 -10 9.78 0.36
 4 2 -10 9.95 0.35
 -3 -3 9 0.08 0.05
 3 3 -9 0.09 0.05
 3 3 -9 0.1 0.07
 -2 -4 8 2.56 0.11
 2 4 -8 2.55 0.14
 2 4 -8 2.6 0.16
 -1 -5 7 3.87 0.1
 -1 -5 7 3.77 0.13
 1 5 -7 3.77 0.19
 1 5 -7 3.75 0.16
 0 -6 6 0.02 0.02
 0 6 -6 0.01 0.05
 0 6 -6 0.04 0.03
 -1 7 -5 2.73 0.17
 -2 8 -4 1.34 0.13
 -3 9 -3 5.02 0.26
 -5 -2 11 13.58 0.45
 5 2 -11 13.85 0.47
 -4 -3 10 12.56 0.39
 4 3 -10 12.74 0.43
 4 3 -10 12.72 0.46
 -3 -4 9 0.01 0.05
 3 4 -9 0 0.05
 3 4 -9 0.04 0.05
 -2 -5 8 3.47 0.14
 2 5 -8 3.1 0.17
 2 5 -8 3.46 0.2
 -1 -6 7 6.97 0.16
 -1 -6 7 7.03 0.2
 1 6 -7 6.52 0.24
 1 6 -7 7.32 0.3
 0 -7 6 0.61 0.04
 0 7 -6 0.68 0.08
 0 7 -6 0.86 0.14
 -1 8 -5 3.33 0.14
 -1 8 -5 3.47 0.21
 -2 9 -4 0.45 0.12
 -3 10 -3 5.52 0.3
 -5 -3 11 0.07 0.08
 5 3 -11 0.02 0.09
 -4 -4 10 0.22 0.08
 4 4 -10 0.13 0.1
 4 4 -10 0.23 0.08
 -3 -5 9 3.81 0.16
 3 5 -9 3.66 0.2
 3 5 -9 3.31 0.21
 -2 -6 8 4.07 0.15
 -2 -6 8 3.91 0.12
 2 6 -8 4.18 0.23
 2 6 -8 3.83 0.19
 -1 -7 7 0.59 0.03
 -1 -7 7 0.57 0.05
 1 7 -7 0.85 0.15
 1 7 -7 0.87 0.11
 0 -8 6 0.08 0.03
 0 8 -6 0.07 0.08
 0 8 -6 0.11 0.05
 -1 9 -5 -0.01 0.07
 -1 9 -5 0 0.04
 -2 10 -4 0.04 0.08
 -5 -4 11 3.85 0.2
 -4 -5 10 1.11 0.13
 4 5 -10 1.58 0.18
 -3 -6 9 3.66 0.16
 3 6 -9 3.66 0.23
 3 6 -9 3.63 0.2
 -2 -7 8 0.09 0.04
 -2 -7 8 0.08 0.05
 2 7 -8 0.16 0.1
 2 7 -8 0.03 0.06
 -1 -8 7 0.59 0.05
 1 8 -7 0.79 0.16
 1 8 -7 0.67 0.1
 0 -9 6 0.63 0.04
 0 9 -6 0.58 0.09
 0 9 -6 0.7 0.15
 -1 10 -5 0.62 0.15
 -4 -6 10 8.55 0.29
 4 6 -10 9.03 0.37
 -3 -7 9 22.8 0.57
 -3 -7 9 22.45 0.5
 3 7 -9 22.74 0.74
 3 7 -9 22.53 0.67
 -2 -8 8 0.52 0.04
 -2 -8 8 0.65 0.08
 2 8 -8 0.63 0.16
 2 8 -8 0.64 0.11
 -1 -9 7 0.01 0.03
 1 9 -7 -0.09 0.07
 1 9 -7 -0.08 0.04
 5 13 2 1.9 0.23
 -5 -13 -2 1.39 0.12
 -5 -13 -2 1.65 0.16
 -5 -13 -2 1.08 0.09
 6 12 1 0.62 0.14
 -6 -12 -1 0.52 0.09
 7 11 0 14.58 0.49
 8 10 -1 9.02 0.35
 -8 -10 1 8.83 0.36
 -8 -10 1 9.05 0.35
 4 13 3 0.96 0.17
 -4 -13 -3 0.9 0.1
 -4 -13 -3 0.81 0.12
 5 12 2 0.5 0.13
 -5 -12 -2 0.41 0.1
 -5 -12 -2 0.47 0.08
 6 11 1 17.17 0.54
 -6 -11 -1 16.59 0.54
 7 10 0 36.46 0.94
 -7 -10 0 35.81 0.96
 -7 -10 0 37.02 0.96
 8 9 -1 1.11 0.15
 -8 -9 1 1.06 0.15
 -8 -9 1 1.42 0.17
 9 8 -2 11.28 0.37
 -9 -8 2 11.23 0.41
 -9 -8 2 11.66 0.42
 3 13 4 0.03 0.09
 -3 -13 -4 0.15 0.08
 -3 -13 -4 0.03 0.05
 4 12 3 0.88 0.16
 -4 -12 -3 0.86 0.1
 -4 -12 -3 0.92 0.12
 5 11 2 1.91 0.2
 -5 -11 -2 1.21 0.11
 -5 -11 -2 1.16 0.09
 -5 -11 -2 1.56 0.17
 -5 -11 -2 1.27 0.11
 6 10 1 2.48 0.17
 -6 -10 -1 2.51 0.17
 -6 -10 -1 2.8 0.17
 7 9 0 7.38 0.29
 -7 -9 0 8.09 0.32
 -7 -9 0 8.16 0.3
 8 8 -1 0.66 0.11
 -8 -8 1 0.77 0.13
 -8 -8 1 0.57 0.12
 9 7 -2 10.49 0.33
 -9 -7 2 10.99 0.39
 -9 -7 2 10.53 0.4
 2 13 5 1.58 0.21
 -2 -13 -5 1.03 0.08
 -2 -13 -5 1.43 0.14
 3 12 4 0.95 0.16
 -3 -12 -4 1.11 0.1
 -3 -12 -4 0.73 0.1
 4 11 3 1.12 0.15
 -4 -11 -3 1.06 0.1
 -4 -11 -3 0.92 0.08
 -4 -11 -3 1.36 0.16
 -4 -11 -3 0.99 0.09
 5 10 2 -0.02 0.06
 -5 -10 -2 -0.04 0.06
 -5 -10 -2 0.02 0.06
 -5 -10 -2 -0.03 0.05
 6 9 1 5.05 0.23
 -6 -9 -1 5.22 0.22
 -6 -9 -1 5.16 0.23
 7 8 0 1.31 0.14
 -7 -8 0 1.23 0.14
 -7 -8 0 1.36 0.15
 8 7 -1 0.5 0.09
 -8 -7 1 0.35 0.09
 -8 -7 1 0.47 0.1
 9 6 -2 0.63 0.09
 -9 -6 2 0.62 0.13
 -9 -6 2 0.63 0.12
 -10 -5 3 0.01 0.08
 -10 -5 3 0.08 0.09
 1 13 6 2 0.18
 -1 -13 -6 2.15 0.14
 2 12 5 5.26 0.27
 -2 -12 -5 5.12 0.2
 -2 -12 -5 5.31 0.18
 3 11 4 0.52 0.12
 -3 -11 -4 0.51 0.1
 -3 -11 -4 0.43 0.07
 -3 -11 -4 0.47 0.08
 4 10 3 3.75 0.19
 -4 -10 -3 3.39 0.14
 -4 -10 -3 3.81 0.19
 -4 -10 -3 3.48 0.15
 -4 -10 -3 3.22 0.16
 5 9 2 3.07 0.17
 -5 -9 -2 3.17 0.17
 -5 -9 -2 2.93 0.16
 6 8 1 4.35 0.19
 -6 -8 -1 4.44 0.19
 -6 -8 -1 4.33 0.2
 7 7 0 4.92 0.2
 -7 -7 0 4.85 0.21
 -7 -7 0 4.84 0.21
 8 6 -1 0.27 0.06
 -8 -6 1 0.19 0.08
 -8 -6 1 0.26 0.09
 9 5 -2 0.51 0.06
 -9 -5 2 0.4 0.1
 -9 -5 2 0.66 0.13
 -10 -4 3 0.35 0.12
 -10 -4 3 0.2 0.1
 0 13 7 2.71 0.22
 0 -13 -7 2.57 0.16
 1 12 6 0.8 0.16
 -1 -12 -6 0.73 0.11
 2 11 5 1.87 0.2
 -2 -11 -5 1.47 0.1
 -2 -11 -5 1.35 0.09
 3 10 4 18.81 0.55
 -3 -10 -4 19.96 0.49
 -3 -10 -4 19.11 0.45
 -3 -10 -4 19.29 0.53
 -3 -10 -4 19.37 0.54
 4 9 3 -0.07 0.05
 -4 -9 -3 -0.04 0.05
 -4 -9 -3 0.03 0.04
 -4 -9 -3 0.01 0.05
 -4 -9 -3 -0.06 0.05
 5 8 2 16.06 0.44
 -5 -8 -2 15.58 0.45
 -5 -8 -2 15.43 0.44
 6 7 1 1.02 0.11
 -6 -7 -1 1.33 0.14
 -6 -7 -1 0.92 0.11
 7 6 0 0.19 0.05
 -7 -6 0 0.29 0.07
 -7 -6 0 0.23 0.07
 8 5 -1 10.33 0.28
 -8 -5 1 10.18 0.37
 -8 -5 1 10.39 0.35
 -9 -4 2 3.77 0.22
 -9 -4 2 4.19 0.22
 -10 -3 3 1.97 0.21
 -10 -3 3 1.93 0.18
 0 12 7 3.85 0.25
 0 -12 -7 4.27 0.2
 1 11 6 1.53 0.19
 -1 -11 -6 1.06 0.09
 -1 -11 -6 1.29 0.08
 2 10 5 1.32 0.12
 -2 -10 -5 1.33 0.1
 -2 -10 -5 1.45 0.11
 -2 -10 -5 1.53 0.08
 -2 -10 -5 1.49 0.09
 3 9 4 3.81 0.18
 -3 -9 -4 4.01 0.14
 -3 -9 -4 3.86 0.15
 -3 -9 -4 4.11 0.18
 -3 -9 -4 4.01 0.15
 -3 -9 -4 4.06 0.17
 4 8 3 0.08 0.05
 -4 -8 -3 0.05 0.04
 -4 -8 -3 0.01 0.04
 -4 -8 -3 0.05 0.05
 -5 -7 -2 14.73 0.41
 -5 -7 -2 14.6 0.42
 6 6 1 8.26 0.25
 -6 -6 -1 8.32 0.28
 -6 -6 -1 7.96 0.27
 7 5 0 1.17 0.07
 -7 -5 0 1.17 0.1
 -7 -5 0 1.23 0.1
 -8 -4 1 6.64 0.27
 -8 -4 1 7.39 0.3
 -9 -3 2 4.15 0.22
 -10 -2 3 0.02 0.07
 -1 12 8 0 0.09
 1 -12 -8 0.03 0.07
 0 11 7 1.8 0.21
 0 -11 -7 1.35 0.11
 1 10 6 1.01 0.15
 -1 -10 -6 0.71 0.06
 -1 -10 -6 0.74 0.11
 -1 -10 -6 0.94 0.1
 -1 -10 -6 1.14 0.13
 2 9 5 0.66 0.1
 2 9 5 0.6 0.05
 -2 -9 -5 0.71 0.07
 -2 -9 -5 0.62 0.09
 -2 -9 -5 0.71 0.08
 -2 -9 -5 0.76 0.09
 3 8 4 0.23 0.04
 3 8 4 0.24 0.06
 -3 -8 -4 0.56 0.08
 -3 -8 -4 0.4 0.06
 -3 -8 -4 0.27 0.05
 4 7 3 0.05 0.02
 -4 -7 -3 0.03 0.04
 -4 -7 -3 0.04 0.03
 -4 -7 -3 0.07 0.04
 5 6 2 2.75 0.12
 5 6 2 2.63 0.11
 -5 -6 -2 2.45 0.12
 -5 -6 -2 2.62 0.12
 6 5 1 10.72 0.27
 -6 -5 -1 11.05 0.33
 -6 -5 -1 10.38 0.31
 -7 -4 0 0.27 0.07
 -7 -4 0 0.12 0.05
 -8 -3 1 20.74 0.58
 -9 -2 2 5.1 0.24
 -10 -1 3 0.62 0.13
 -1 11 8 0.13 0.09
 1 -11 -8 0.07 0.07
 0 10 7 5.88 0.27
 0 -10 -7 5.97 0.22
 1 9 6 0.57 0.06
 1 9 6 0.66 0.12
 -1 -9 -6 0.57 0.08
 -1 -9 -6 0.49 0.08
 -1 -9 -6 0.5 0.06
 -1 -9 -6 0.64 0.09
 2 8 5 2.08 0.12
 2 8 5 2.15 0.09
 2 8 5 2.08 0.13
 -2 -8 -5 2.24 0.11
 -2 -8 -5 2.14 0.09
 -2 -8 -5 2.02 0.11
 -2 -8 -5 2.02 0.1
 3 7 4 0.95 0.1
 3 7 4 0.52 0.04
 3 7 4 0.8 0.1
 -3 -7 -4 0.88 0.09
 -3 -7 -4 0.54 0.04
 -3 -7 -4 0.63 0.05
 -3 -7 -4 0.71 0.06
 -4 -6 -3 1.63 0.08
 -4 -6 -3 1.45 0.09
 -4 -6 -3 1.56 0.08
 5 5 2 37.23 0.83
 5 5 2 37.63 0.84
 -5 -5 -2 39.02 0.86
 -5 -5 -2 36.64 0.9
 -5 -5 -2 37.24 0.87
 -6 -4 -1 4.33 0.17
 -7 -3 0 19.43 0.52
 -8 -2 1 10.46 0.35
 -9 -1 2 1.24 0.16
 -10 0 3 -0.01 0.07
 -2 11 9 0.15 0.11
 2 -11 -9 0.38 0.1
 -1 10 8 9.71 0.38
 1 -10 -8 9.75 0.32
 0 9 7 19.97 0.59
 0 -9 -7 20.19 0.51
 0 -9 -7 20.61 0.57
 0 -9 -7 20.14 0.56
 1 8 6 1.1 0.06
 1 8 6 1.3 0.14
 1 8 6 1.34 0.15
 -1 -8 -6 1.09 0.06
 -1 -8 -6 0.99 0.09
 -1 -8 -6 0.95 0.07
 -1 -8 -6 1.13 0.07
 2 7 5 12.95 0.38
 2 7 5 13.79 0.41
 2 7 5 13.95 0.34
 -2 -7 -5 13.79 0.34
 -2 -7 -5 13.85 0.32
 -2 -7 -5 13.44 0.37
 -2 -7 -5 13.89 0.37
 3 6 4 0.09 0.02
 3 6 4 0.19 0.04
 -3 -6 -4 0.07 0.03
 -3 -6 -4 0.12 0.03
 -3 -6 -4 0.1 0.04
 -3 -6 -4 0.21 0.04
 4 5 3 21.45 0.49
 4 5 3 20.3 0.49
 -4 -5 -3 20.14 0.5
 -4 -5 -3 22.43 0.5
 -4 -5 -3 21.08 0.52
 -4 -5 -3 21.45 0.52
 -5 -4 -2 17.59 0.47
 -5 -4 -2 17.77 0.42
 -5 -4 -2 17.74 0.44
 -6 -3 -1 7.36 0.2
 -7 -2 0 9.99 0.32
 -8 -1 1 0.28 0.08
 -9 0 2 0.08 0.07
 -10 1 3 0.57 0.14
 -2 10 9 0.09 0.09
 2 -10 -9 -0.04 0.06
 -1 9 8 13.88 0.46
 1 -9 -8 13.27 0.39
 0 8 7 57.11 1.4
 0 8 7 57.36 1.37
 0 -8 -7 57.7 1.29
 0 -8 -7 58.84 1.36
 0 -8 -7 60.17 1.39
 1 7 6 0.03 0.04
 1 7 6 0.01 0.04
 1 7 6 -0.05 0.03
 -1 -7 -6 0 0.03
 -1 -7 -6 -0.01 0.02
 -1 -7 -6 0 0.03
 -1 -7 -6 -0.01 0.02
 2 6 5 47.08 1.11
 2 6 5 49.71 1.18
 2 6 5 50.96 1.08
 -2 -6 -5 49.78 1.13
 -2 -6 -5 49.67 1.07
 -2 -6 -5 49.3 1.14
 -2 -6 -5 49.28 1
 -2 -6 -5 48.82 1.11
 3 5 4 0.28 0.04
 3 5 4 0.31 0.04
 -3 -5 -4 0.23 0.04
 -3 -5 -4 0.21 0.04
 -3 -5 -4 0.36 0.03
 -3 -5 -4 0.26 0.04
 -4 -4 -3 4.55 0.17
 -4 -4 -3 4.79 0.15
 -4 -4 -3 4.63 0.13
 -4 -4 -3 4.91 0.13
 -5 -3 -2 21.97 0.56
 -5 -3 -2 22.58 0.56
 -6 -2 -1 2.11 0.1
 -6 -2 -1 2.11 0.1
 -7 -1 0 8.61 0.29
 -8 0 1 0.07 0.06
 -9 1 2 0.39 0.11
 -3 10 10 2.32 0.22
 3 -10 -10 2.22 0.16
 -2 9 9 0.05 0.09
 2 -9 -9 0.01 0.06
 -1 8 8 2.96 0.22
 -1 8 8 3.43 0.2
 1 -8 -8 3.1 0.15
 1 -8 -8 3.33 0.17
 1 -8 -8 3.6 0.19
 0 7 7 2.1 0.14
 0 7 7 2.16 0.14
 0 -7 -7 2.02 0.1
 0 -7 -7 2.11 0.13
 0 -7 -7 2.19 0.12
 0 -7 -7 2.15 0.12
 1 6 6 4.9 0.21
 1 6 6 4.95 0.19
 1 6 6 5.01 0.14
 1 6 6 5.24 0.2
 -1 -6 -6 4.99 0.18
 -1 -6 -6 5.3 0.16
 -1 -6 -6 5.06 0.14
 -1 -6 -6 4.97 0.18
 -1 -6 -6 5.02 0.17
 2 5 5 2.82 0.07
 2 5 5 2.76 0.12
 -2 -5 -5 2.66 0.11
 -2 -5 -5 2.71 0.1
 -2 -5 -5 2.63 0.11
 -2 -5 -5 2.67 0.09
 -2 -5 -5 2.49 0.09
 3 4 4 16.04 0.36
 3 4 4 17.11 0.36
 -3 -4 -4 16.04 0.44
 -3 -4 -4 16.07 0.4
 -3 -4 -4 15.96 0.38
 -3 -4 -4 16.83 0.37
 -4 -3 -3 19.07 0.46
 -4 -3 -3 18.35 0.45
 -4 -3 -3 18.57 0.43
 -5 -2 -2 79.69 1.75
 -5 -2 -2 82.38 1.82
 -6 -1 -1 21.73 0.54
 -6 -1 -1 21.76 0.54
 -6 -1 -1 22.01 0.53
 -7 0 0 30.82 0.77
 -8 1 1 23.09 0.64
 -9 2 2 1.06 0.16
 -3 9 10 10.51 0.43
 3 -9 -10 10.01 0.36
 -2 8 9 12.94 0.45
 2 -8 -9 12.28 0.38
 -1 7 8 138.12 3.11
 -1 7 8 136.87 3.04
 1 -7 -8 138.77 3.07
 1 -7 -8 137.44 2.96
 1 -7 -8 139.52 3.15
 1 -7 -8 139.34 3.05
 0 6 7 3.92 0.18
 0 6 7 3.6 0.18
 0 -6 -7 3.86 0.17
 0 -6 -7 3.89 0.16
 0 -6 -7 4.16 0.17
 0 -6 -7 3.95 0.14
 1 5 6 58.87 1.28
 1 5 6 58.81 1.23
 1 5 6 57.24 1.31
 -1 -5 -6 57.01 1.14
 -1 -5 -6 57.13 1.28
 -1 -5 -6 55.59 1.29
 -1 -5 -6 56.23 1.31
 -1 -5 -6 56.74 1.23
 2 4 5 20.2 0.48
 2 4 5 20.8 0.45
 -2 -4 -5 19.94 0.49
 -2 -4 -5 20.86 0.48
 -2 -4 -5 20.82 0.43
 -2 -4 -5 20.12 0.48
 -3 -3 -4 126.04 2.74
 -3 -3 -4 127.15 2.85
 -3 -3 -4 127.76 2.84
 -4 -2 -3 28.77 0.66
 -4 -2 -3 29.29 0.64
 -5 -1 -2 19.2 0.45
 -5 -1 -2 18.73 0.45
 -5 -1 -2 19.22 0.44
 -6 0 -1 5.2 0.18
 -6 0 -1 5.13 0.16
 -6 0 -1 5.16 0.17
 -7 1 0 49.25 1.16
 -8 2 1 12.73 0.42
 -9 3 2 1.13 0.17
 -3 8 10 0.29 0.12
 3 -8 -10 0.24 0.09
 -2 7 9 2.98 0.19
 2 -7 -9 3.25 0.16
 2 -7 -9 2.94 0.16
 -1 6 8 3.55 0.18
 1 -6 -8 3.62 0.16
 1 -6 -8 3.83 0.19
 1 -6 -8 3.62 0.15
 1 -6 -8 3.71 0.17
 0 5 7 9.97 0.33
 0 5 7 10.06 0.24
 0 5 7 10.03 0.31
 0 -5 -7 9.65 0.31
 0 -5 -7 9.92 0.3
 0 -5 -7 9.73 0.27
 0 -5 -7 9.79 0.29
 1 4 6 25 0.63
 1 4 6 28.18 0.58
 1 4 6 26.83 0.66
 -1 -4 -6 26.77 0.59
 -1 -4 -6 27.09 0.64
 -1 -4 -6 26.87 0.55
 -1 -4 -6 26 0.63
 -1 -4 -6 26.82 0.64
 2 3 5 7.93 0.17
 -2 -3 -5 8.24 0.18
 -2 -3 -5 7.37 0.17
 -2 -3 -5 7.2 0.18
 -2 -3 -5 7.76 0.23
 -2 -3 -5 7.57 0.2
 -3 -2 -4 1.65 0.06
 -3 -2 -4 1.73 0.05
 -4 -1 -3 0.78 0.03
 -5 0 -2 2.49 0.08
 -5 0 -2 2.48 0.09
 -5 0 -2 2.45 0.08
 -5 0 -2 2.36 0.09
 -6 1 -1 0.93 0.07
 -6 1 -1 1.15 0.06
 -6 1 -1 1.03 0.07
 -6 1 -1 0.94 0.07
 -7 2 0 5.48 0.22
 -7 2 0 5.38 0.22
 -8 3 1 5.77 0.26
 -9 4 2 1.8 0.22
 -4 8 11 0.26 0.13
 4 -8 -11 0.35 0.1
 -3 7 10 8.55 0.36
 3 -7 -10 8.55 0.31
 -2 6 9 1.43 0.13
 2 -6 -9 1.5 0.11
 2 -6 -9 1.33 0.12
 2 -6 -9 1.74 0.14
 2 -6 -9 1.44 0.11
 -1 5 8 0.2 0.07
 -1 5 8 0.18 0.06
 1 -5 -8 0.3 0.06
 1 -5 -8 0.32 0.08
 1 -5 -8 0.2 0.05
 1 -5 -8 0.26 0.07
 0 4 7 41.31 0.96
 0 4 7 41.66 1
 0 4 7 43.03 0.83
 0 -4 -7 39.92 0.98
 0 -4 -7 39.37 0.95
 0 -4 -7 41.87 0.97
 1 3 6 92.29 2.02
 1 3 6 90.1 1.96
 -1 -3 -6 93.8 2.01
 -1 -3 -6 90.62 2.09
 -1 -3 -6 92.51 1.82
 -1 -3 -6 91.56 2
 -1 -3 -6 91.12 2.02
 -2 -2 -5 6.63 0.19
 -2 -2 -5 6.77 0.17
 -3 -1 -4 41.25 0.86
 -3 -1 -4 39.99 0.87
 -4 0 -3 5.69 0.13
 -4 0 -3 5.46 0.13
 -5 1 -2 6.62 0.17
 -5 1 -2 6.28 0.17
 -5 1 -2 6.33 0.18
 -5 1 -2 6.28 0.17
 -6 2 -1 1.04 0.08
 -6 2 -1 1.06 0.08
 -7 3 0 1.16 0.11
 -7 3 0 1.1 0.1
 -8 4 1 0.26 0.09
 -8 4 1 0.14 0.08
 -4 7 11 1.56 0.23
 4 -7 -11 1.44 0.17
 -3 6 10 3.14 0.21
 3 -6 -10 3.34 0.17
 -2 5 9 0.05 0.06
 2 -5 -9 0.13 0.07
 2 -5 -9 0.15 0.06
 2 -5 -9 0.13 0.06
 2 -5 -9 0.11 0.05
 -1 4 8 15.82 0.46
 -1 4 8 16.99 0.36
 -1 4 8 17.14 0.5
 1 -4 -8 16.06 0.47
 1 -4 -8 16.55 0.46
 1 -4 -8 16.51 0.45
 1 -4 -8 15.47 0.42
 0 3 7 8.49 0.19
 0 3 7 8.24 0.28
 0 3 7 7.55 0.25
 0 -3 -7 8.26 0.26
 0 -3 -7 8.04 0.25
 0 -3 -7 8.23 0.25
 0 -3 -7 8.46 0.23
 1 2 6 36.91 0.78
 1 2 6 36.14 0.8
 -1 -2 -6 36.74 0.85
 -1 -2 -6 37.23 0.86
 -1 -2 -6 37.2 0.73
 -1 -2 -6 37.49 0.84
 -1 -2 -6 35.65 0.82
 -2 -1 -5 80.48 1.71
 -2 -1 -5 78.12 1.76
 -2 -1 -5 78.15 1.71
 -3 0 -4 65.16 1.37
 -3 0 -4 64.6 1.37
 -4 1 -3 8.6 0.2
 -5 2 -2 16.05 0.39
 -5 2 -2 16.18 0.4
 -5 2 -2 15.77 0.38
 -5 2 -2 16.48 0.41
 -6 3 -1 14.73 0.41
 -6 3 -1 14.79 0.41
 -7 4 0 0.63 0.11
 -7 4 0 0.64 0.11
 -8 5 1 0.8 0.14
 -8 5 1 0.87 0.15
 -4 6 11 0.72 0.16
 4 -6 -11 0.63 0.12
 -3 5 10 0.09 0.07
 3 -5 -10 0.04 0.05
 3 -5 -10 0.16 0.07
 -2 4 9 0.6 0.11
 2 -4 -9 0.57 0.09
 2 -4 -9 0.67 0.11
 2 -4 -9 0.66 0.1
 2 -4 -9 0.48 0.08
 -1 3 8 10.48 0.24
 -1 3 8 10.07 0.32
 -1 3 8 9.63 0.34
 1 -3 -8 10.5 0.29
 1 -3 -8 10.16 0.32
 1 -3 -8 9.69 0.3
 1 -3 -8 10.1 0.33
 0 2 7 1.63 0.1
 0 2 7 1.63 0.05
 0 -2 -7 1.6 0.1
 0 -2 -7 1.68 0.08
 0 -2 -7 1.52 0.09
 0 -2 -7 1.52 0.08
 1 1 6 0.77 0.02
 -1 -1 -6 0.68 0.06
 -1 -1 -6 0.71 0.03
 -1 -1 -6 0.69 0.05
 -2 0 -5 0.52 0.04
 -2 0 -5 0.65 0.03
 -2 0 -5 0.49 0.03
 -2 0 -5 0.56 0.04
 -3 1 -4 8.04 0.19
 -4 2 -3 2.54 0.08
 -4 2 -3 2.5 0.08
 -4 2 -3 2.49 0.07
 -5 3 -2 60.13 1.39
 -5 3 -2 60.9 1.32
 -5 3 -2 60.06 1.36
 -6 4 -1 21.52 0.57
 -6 4 -1 21.88 0.58
 -7 5 0 1.9 0.15
 -7 5 0 2.05 0.15
 -8 6 1 1.96 0.17
 -5 6 12 0.49 0.16
 5 -6 -12 0.41 0.12
 -4 5 11 2.28 0.19
 4 -5 -11 2.75 0.17
 -3 4 10 1.48 0.18
 3 -4 -10 1.26 0.17
 3 -4 -10 1.03 0.1
 3 -4 -10 1.46 0.15
 3 -4 -10 1.35 0.16
 -2 3 9 0.5 0.11
 -2 3 9 0.34 0.08
 2 -3 -9 0.44 0.08
 2 -3 -9 0.41 0.08
 2 -3 -9 0.27 0.08
 2 -3 -9 0.26 0.06
 -1 2 8 14.93 0.42
 -1 2 8 15.63 0.46
 -1 2 8 15.46 0.33
 1 -2 -8 15.03 0.42
 1 -2 -8 15.19 0.4
 1 -2 -8 14.81 0.43
 1 -2 -8 15.47 0.44
 0 1 7 8.63 0.27
 0 1 7 8.95 0.19
 0 1 7 8.47 0.23
 0 -1 -7 8.72 0.27
 0 -1 -7 8.72 0.29
 0 -1 -7 8.77 0.26
 0 -1 -7 8.66 0.25
 -1 0 -6 46.27 1.01
 -1 0 -6 46.75 1.06
 -1 0 -6 48.89 1.08
 -2 1 -5 109.28 2.5
 -2 1 -5 112.33 2.48
 -2 1 -5 112.72 2.42
 -2 1 -5 112.85 2.4
 -3 2 -4 0.05 0.02
 -3 2 -4 0.03 0.01
 -3 2 -4 0.02 0.01
 -4 3 -3 2.21 0.09
 -4 3 -3 2.53 0.08
 -4 3 -3 2.32 0.1
 -5 4 -2 18.07 0.49
 -6 5 -1 14.54 0.44
 -6 5 -1 14.22 0.42
 -7 6 0 1.18 0.15
 -7 6 0 1.14 0.16
 -5 5 12 0.5 0.14
 5 -5 -12 0.56 0.13
 -4 4 11 0.29 0.11
 4 -4 -11 0.29 0.09
 -3 3 10 1.53 0.17
 3 -3 -10 1.26 0.11
 3 -3 -10 1.21 0.1
 3 -3 -10 1.57 0.18
 3 -3 -10 1.96 0.14
 -2 2 9 0.03 0.04
 2 -2 -9 0.03 0.04
 2 -2 -9 0.11 0.05
 2 -2 -9 0.05 0.05
 2 -2 -9 0.02 0.03
 -1 1 8 1.16 0.1
 -1 1 8 1.09 0.05
 -1 1 8 1.1 0.08
 1 -1 -8 1.15 0.09
 1 -1 -8 1.13 0.08
 1 -1 -8 1.08 0.08
 1 -1 -8 1.12 0.09
 0 0 7 2.69 0.08
 0 0 7 2.72 0.07
 0 0 7 2.76 0.09
 0 0 -7 2.75 0.13
 0 0 -7 2.96 0.15
 0 0 -7 2.64 0.11
 0 0 -7 2.79 0.12
 -1 1 -6 70.71 1.62
 -1 1 -6 71.07 1.58
 -1 1 -6 70.64 1.56
 -2 2 -5 111.41 2.51
 -2 2 -5 111.96 2.47
 -2 2 -5 110.29 2.39
 -3 3 -4 4.83 0.14
 -3 3 -4 4.91 0.15
 -3 3 -4 4.79 0.16
 -4 4 -3 11.29 0.33
 -4 4 -3 11.55 0.32
 -5 5 -2 13.76 0.41
 -6 6 -1 1.27 0.15
 -6 6 -1 1.21 0.14
 -7 7 0 1.21 0.17
 -7 7 0 1.31 0.17
 -5 4 12 0.07 0.1
 5 -4 -12 0.05 0.07
 -4 3 11 5.46 0.27
 4 -3 -11 5.22 0.23
 -3 2 10 7.47 0.29
 3 -2 -10 7.14 0.26
 3 -2 -10 7.17 0.27
 3 -2 -10 7.12 0.29
 3 -2 -10 7.44 0.31
 -2 1 9 0.53 0.09
 2 -1 -9 0.23 0.07
 2 -1 -9 0.36 0.07
 2 -1 -9 0.6 0.09
 2 -1 -9 0.88 0.11
 -1 0 8 15.71 0.44
 1 0 -8 15.02 0.44
 1 0 -8 15.27 0.42
 1 0 -8 15.96 0.41
 1 0 -8 14.83 0.44
 0 -1 7 0.06 0.02
 0 -1 7 0.01 0.01
 0 -1 7 0.05 0.02
 0 1 -7 0.02 0.03
 0 1 -7 -0.03 0.02
 0 1 -7 -0.04 0.03
 0 1 -7 0.01 0.02
 -1 2 -6 35.86 0.86
 -1 2 -6 36.06 0.85
 -2 3 -5 12.04 0.31
 -2 3 -5 11.77 0.32
 -2 3 -5 11.82 0.32
 -3 4 -4 11.43 0.3
 -3 4 -4 11.22 0.33
 -4 5 -3 29.01 0.74
 -5 6 -2 3.25 0.17
 -6 7 -1 0.25 0.09
 -6 7 -1 0.31 0.09
 -5 3 12 0.58 0.15
 5 -3 -12 0.43 0.11
 -4 2 11 5.22 0.26
 4 -2 -11 5.34 0.24
 4 -2 -11 5.15 0.23
 -3 1 10 4.05 0.21
 3 -1 -10 4.7 0.21
 3 -1 -10 4.49 0.22
 3 -1 -10 4.67 0.2
 3 -1 -10 4.61 0.23
 -2 0 9 0.09 0.05
 2 0 -9 0.17 0.06
 2 0 -9 0.09 0.04
 2 0 -9 0.41 0.08
 2 0 -9 0.09 0.05
 1 1 -8 0.34 0.06
 1 1 -8 0.28 0.06
 1 1 -8 0.43 0.08
 0 -2 7 6.86 0.17
 0 -2 7 6.66 0.17
 0 2 -7 6.21 0.22
 0 2 -7 6.33 0.22
 0 2 -7 6.3 0.19
 -3 5 -4 0.69 0.09
 -4 6 -3 2.45 0.15
 -5 7 -2 0.3 0.08
 -6 8 -1 1.06 0.16
 -5 2 12 0.68 0.15
 5 -2 -12 0.72 0.14
 -4 1 11 1.69 0.15
 4 -1 -11 1.64 0.13
 4 -1 -11 1.41 0.13
 -3 0 10 0.22 0.08
 3 0 -10 0.65 0.11
 3 0 -10 0.05 0.06
 3 0 -10 0.1 0.07
 3 0 -10 0.15 0.06
 -2 -1 9 0.04 0.04
 2 1 -9 -0.01 0.03
 2 1 -9 0.04 0.05
 2 1 -9 0.01 0.04
 1 2 -8 6.33 0.22
 1 2 -8 6.92 0.25
 1 2 -8 6.39 0.24
 0 -3 7 1.53 0.06
 0 3 -7 1.45 0.08
 0 3 -7 1.44 0.1
 -1 4 -6 12.26 0.37
 -2 5 -5 4 0.18
 -3 6 -4 2.4 0.14
 -4 7 -3 0.28 0.08
 -5 8 -2 0.29 0.1
 -5 1 12 1.74 0.21
 5 -1 -12 1.74 0.2
 -4 0 11 2.83 0.18
 4 0 -11 2.98 0.18
 4 0 -11 3.1 0.18
 4 0 -11 2.62 0.19
 -3 -1 10 4.32 0.2
 3 1 -10 4.38 0.22
 3 1 -10 4.18 0.22
 3 1 -10 4.41 0.21
 -2 -2 9 5.09 0.18
 2 2 -9 5.25 0.23
 2 2 -9 5.34 0.22
 2 2 -9 4.86 0.22
 -1 -3 8 0.32 0.05
 1 3 -8 0.36 0.06
 1 3 -8 0.33 0.08
 0 -4 7 20.61 0.46
 0 4 -7 20.56 0.51
 0 4 -7 21.75 0.58
 -1 5 -6 6.13 0.24
 -2 6 -5 1.6 0.12
 -3 7 -4 0.32 0.08
 -4 8 -3 0.75 0.13
 -5 0 12 0.29 0.11
 5 0 -12 0.21 0.1
 -4 -1 11 0.01 0.06
 4 1 -11 0.09 0.08
 4 1 -11 -0.01 0.07
 4 1 -11 0.03 0.08
 4 1 -11 0.11 0.07
 -3 -2 10 2.42 0.14
 3 2 -10 2.59 0.17
 3 2 -10 2.69 0.17
 3 2 -10 2.44 0.16
 -2 -3 9 12.13 0.33
 2 3 -9 12.13 0.41
 2 3 -9 11.86 0.38
 -1 -4 8 3.12 0.11
 -1 -4 8 3.1 0.09
 1 4 -8 3.09 0.17
 1 4 -8 3.13 0.15
 0 -5 7 20.56 0.45
 0 5 -7 20.48 0.59
 0 5 -7 20.3 0.51
 -1 6 -6 0.55 0.06
 -1 6 -6 0.55 0.1
 -2 7 -5 0.35 0.09
 -3 8 -4 1.9 0.15
 -4 9 -3 4.04 0.24
 -5 -1 12 7.55 0.32
 5 1 -12 7.75 0.33
 -4 -2 11 44.29 1.06
 4 2 -11 43.3 1.12
 4 2 -11 43.28 1.17
 -3 -3 10 1.55 0.11
 3 3 -10 1.43 0.14
 3 3 -10 1.4 0.12
 -2 -4 9 52.86 1.18
 2 4 -9 52.45 1.28
 2 4 -9 55.07 1.35
 -1 -5 8 3.13 0.11
 -1 -5 8 3.18 0.08
 1 5 -8 3.16 0.16
 1 5 -8 3.15 0.19
 0 -6 7 -0.01 0.02
 0 6 -7 -0.01 0.03
 0 6 -7 0.01 0.06
 -1 7 -6 6.56 0.21
 -1 7 -6 6.97 0.3
 -2 8 -5 0.52 0.12
 -3 9 -4 0.49 0.13
 -5 -2 12 3.58 0.21
 -4 -3 11 14.46 0.43
 4 3 -11 14.55 0.49
 4 3 -11 14.93 0.57
 -3 -4 10 6.47 0.23
 3 4 -10 6.83 0.29
 3 4 -10 6.53 0.31
 -2 -5 9 0.22 0.06
 -2 -5 9 0.3 0.04
 2 5 -9 0.25 0.1
 2 5 -9 0.24 0.08
 -1 -6 8 -0.04 0.03
 1 6 -8 -0.1 0.06
 1 6 -8 -0.01 0.05
 0 -7 7 1.01 0.04
 0 7 -7 0.95 0.08
 0 7 -7 1.49 0.18
 -1 8 -6 5.92 0.29
 -1 8 -6 5.46 0.2
 -2 9 -5 0.9 0.16
 -4 -4 11 1.11 0.13
 4 4 -11 1.06 0.16
 -3 -5 10 1.8 0.11
 3 5 -10 1.81 0.17
 3 5 -10 1.47 0.14
 -2 -6 9 2.57 0.12
 -2 -6 9 2.52 0.09
 2 6 -9 2.46 0.16
 2 6 -9 2.3 0.18
 -1 -7 8 0.57 0.06
 1 7 -8 0.35 0.12
 1 7 -8 0.36 0.08
 0 8 -7 0 0.04
 0 8 -7 -0.09 0.07
 -1 9 -6 4.42 0.2
 -1 9 -6 4.83 0.27
 -4 -5 11 0.08 0.07
 4 5 -11 0.22 0.09
 -3 -6 10 12.47 0.35
 -3 -6 10 12.5 0.3
 3 6 -10 13.06 0.45
 3 6 -10 12.62 0.49
 -2 -7 9 6.63 0.21
 -2 -7 9 6.45 0.15
 2 7 -9 6.7 0.28
 2 7 -9 6.51 0.33
 -1 -8 8 0.09 0.04
 1 8 -8 0.07 0.06
 1 8 -8 0.05 0.09
 0 9 -7 1.01 0.18
 5 13 3 0.08 0.09
 -5 -13 -3 -0.04 0.05
 6 12 2 -0.07 0.07
 7 11 1 7.67 0.31
 -7 -11 -1 7.78 0.33
 -7 -11 -1 7.52 0.31
 8 10 0 14.5 0.46
 -8 -10 0 14.59 0.49
 -8 -10 0 14.12 0.47
 9 9 -1 1.02 0.13
 -9 -9 1 1.41 0.18
 -9 -9 1 1.21 0.18
 4 13 4 2.51 0.19
 -4 -13 -4 2.3 0.14
 -4 -13 -4 2.39 0.12
 5 12 3 0.18 0.1
 -5 -12 -3 0.11 0.06
 6 11 2 4.81 0.24
 -6 -11 -2 4.58 0.24
 -6 -11 -2 4.83 0.23
 7 10 1 0.05 0.07
 -7 -10 -1 -0.04 0.06
 -7 -10 -1 0.06 0.07
 8 9 0 5.84 0.24
 -8 -9 0 5.67 0.26
 -8 -9 0 5.7 0.26
 9 8 -1 0.02 0.05
 -9 -8 1 -0.08 0.06
 -9 -8 1 0.05 0.08
 3 13 5 0.02 0.08
 -3 -13 -5 0.13 0.06
 -3 -13 -5 0.19 0.08
 4 12 4 1.52 0.18
 -4 -12 -4 1.09 0.09
 -4 -12 -4 1.51 0.15
 5 11 3 1.71 0.18
 -5 -11 -3 1.27 0.15
 -5 -11 -3 1.16 0.11
 -5 -11 -3 1.18 0.09
 6 10 2 13.31 0.43
 -6 -10 -2 13.84 0.44
 -6 -10 -2 14.26 0.45
 7 9 1 0.68 0.11
 -7 -9 -1 0.58 0.11
 -7 -9 -1 0.71 0.12
 8 8 0 3.39 0.16
 -8 -8 0 3.22 0.19
 -8 -8 0 3.35 0.18
 9 7 -1 0.9 0.09
 -9 -7 1 1.15 0.16
 -9 -7 1 0.91 0.14
 -10 -6 2 1.69 0.16
 -10 -6 2 2.13 0.17
 2 13 6 0.05 0.09
 -2 -13 -6 -0.01 0.06
 -2 -13 -6 0.03 0.05
 3 12 5 0.13 0.09
 -3 -12 -5 0.06 0.06
 -3 -12 -5 0.04 0.05
 4 11 4 0.05 0.07
 -4 -11 -4 0.08 0.06
 -4 -11 -4 0.11 0.05
 -4 -11 -4 0.1 0.06
 -4 -11 -4 0.04 0.05
 -4 -11 -4 0.01 0.06
 5 10 3 0.64 0.11
 -5 -10 -3 0.72 0.11
 -5 -10 -3 0.71 0.11
 -5 -10 -3 0.76 0.09
 6 9 2 1.9 0.13
 -6 -9 -2 1.81 0.14
 -6 -9 -2 2.2 0.13
 7 8 1 -0.03 0.04
 -7 -8 -1 0.07 0.06
 -7 -8 -1 0.08 0.07
 8 7 0 0.6 0.08
 -8 -7 0 0.47 0.1
 -8 -7 0 0.55 0.11
 9 6 -1 0.4 0.04
 -9 -6 1 0.53 0.11
 -9 -6 1 0.72 0.12
 -10 -5 2 -0.03 0.06
 -10 -5 2 0.02 0.07
 1 13 7 0.02 0.09
 -1 -13 -7 0.04 0.07
 2 12 6 1.77 0.16
 -2 -12 -6 1.86 0.1
 -2 -12 -6 1.87 0.12
 3 11 5 22.5 0.65
 -3 -11 -5 23.39 0.62
 -3 -11 -5 22.66 0.57
 -3 -11 -5 23.66 0.63
 -3 -11 -5 22.99 0.53
 4 10 4 -0.01 0.05
 -4 -10 -4 0.04 0.05
 -4 -10 -4 -0.02 0.04
 -4 -10 -4 -0.03 0.05
 -4 -10 -4 0.02 0.04
 5 9 3 26.23 0.68
 -5 -9 -3 27.17 0.69
 -5 -9 -3 25.53 0.69
 6 8 2 4.09 0.17
 -6 -8 -2 4.12 0.18
 -6 -8 -2 4.13 0.19
 7 7 1 0.21 0.05
 -7 -7 -1 0.37 0.08
 -7 -7 -1 0.1 0.06
 8 6 0 0.15 0.04
 -8 -6 0 0.22 0.08
 -8 -6 0 0.16 0.07
 -9 -5 1 1.52 0.17
 -9 -5 1 1.2 0.16
 -10 -4 2 0.04 0.07
 -10 -4 2 0.01 0.07
 1 12 7 2.14 0.18
 -1 -12 -7 2.24 0.14
 2 11 6 0.03 0.07
 -2 -11 -6 0.02 0.04
 -2 -11 -6 0.08 0.06
 3 10 5 5.91 0.25
 -3 -10 -5 6.04 0.21
 -3 -10 -5 6.04 0.24
 -3 -10 -5 6.26 0.19
 -3 -10 -5 6.34 0.23
 4 9 4 1.33 0.11
 -4 -9 -4 1.07 0.08
 -4 -9 -4 1.27 0.1
 -4 -9 -4 1.3 0.1
 -4 -9 -4 1.48 0.08
 5 8 3 56.03 1.28
 -5 -8 -3 56.9 1.34
 -5 -8 -3 56.92 1.32
 6 7 2 35.08 0.8
 -6 -7 -2 33.89 0.84
 -6 -7 -2 34.75 0.86
 7 6 1 1.66 0.08
 -7 -6 -1 1.6 0.11
 -7 -6 -1 1.76 0.11
 -8 -5 0 1.73 0.12
 -8 -5 0 1.57 0.13
 -9 -4 1 0.66 0.13
 -9 -4 1 0.43 0.1
 -10 -3 2 0.27 0.1
 0 12 8 0.23 0.11
 0 -12 -8 0.45 0.1
 1 11 7 0.09 0.08
 -1 -11 -7 0.17 0.07
 2 10 6 0.43 0.1
 -2 -10 -6 0.52 0.08
 -2 -10 -6 0.66 0.1
 -2 -10 -6 0.5 0.08
 -2 -10 -6 0.48 0.06
 -3 -9 -5 0.36 0.07
 4 8 4 7.03 0.24
 -4 -8 -4 7.56 0.25
 -4 -8 -4 7.1 0.24
 -4 -8 -4 6.91 0.22
 5 7 3 35.84 0.85
 -5 -7 -3 36.84 0.89
 -5 -7 -3 37.14 0.88
 6 6 2 7.34 0.21
 -6 -6 -2 7.37 0.25
 -6 -6 -2 7.46 0.25
 -7 -5 -1 1.3 0.1
 -7 -5 -1 1.34 0.1
 -8 -4 0 0.21 0.07
 -8 -4 0 0.26 0.08
 -9 -3 1 1.54 0.13
 -10 -2 2 1.47 0.18
 -1 12 9 2.17 0.2
 1 -12 -9 1.83 0.15
 0 11 8 22.7 0.68
 0 -11 -8 21.62 0.58
 1 10 7 15.97 0.5
 -1 -10 -7 15.9 0.39
 -1 -10 -7 16.24 0.46
 -1 -10 -7 15.93 0.43
 -1 -10 -7 16.29 0.48
 2 9 6 1.23 0.14
 -2 -9 -6 1.06 0.08
 -2 -9 -6 1.19 0.1
 -2 -9 -6 0.97 0.07
 -2 -9 -6 1.14 0.07
 3 8 5 2.11 0.12
 -3 -8 -5 2.03 0.11
 -3 -8 -5 2.08 0.12
 -3 -8 -5 2.03 0.09
 -3 -8 -5 2.08 0.1
 -3 -8 -5 2.03 0.1
 -4 -7 -4 2.81 0.12
 -4 -7 -4 2.65 0.12
 -4 -7 -4 2.64 0.13
 5 6 3 3.91 0.13
 5 6 3 4.16 0.14
 -5 -6 -3 3.98 0.15
 -5 -6 -3 4.11 0.16
 -6 -5 -2 0.78 0.07
 -6 -5 -2 0.78 0.07
 -7 -4 -1 6.55 0.23
 -7 -4 -1 6.43 0.24
 -8 -3 0 9.18 0.31
 -9 -2 1 0.22 0.08
 -10 -1 2 0.71 0.13
 -1 11 9 2.38 0.2
 1 -11 -9 2.65 0.16
 0 10 8 48.41 1.21
 0 -10 -8 48.05 1.12
 1 9 7 11.84 0.39
 -1 -9 -7 11.45 0.35
 -1 -9 -7 11.44 0.32
 -1 -9 -7 11.3 0.36
 -1 -9 -7 11.77 0.29
 2 8 6 1.52 0.11
 -2 -8 -6 1.61 0.08
 -2 -8 -6 1.53 0.08
 -2 -8 -6 1.65 0.09
 -2 -8 -6 1.52 0.1
 -3 -7 -5 0.2 0.05
 -3 -7 -5 0.14 0.04
 -3 -7 -5 0.21 0.05
 -3 -7 -5 0.09 0.03
 -3 -7 -5 0.14 0.04
 4 6 4 5.75 0.17
 4 6 4 5.45 0.17
 -4 -6 -4 5.45 0.19
 -4 -6 -4 5.2 0.18
 -4 -6 -4 5.62 0.16
 -4 -6 -4 5.16 0.18
 -5 -5 -3 22.33 0.54
 -5 -5 -3 23.02 0.52
 -5 -5 -3 21.26 0.52
 -5 -5 -3 21.57 0.56
 -7 -3 -1 2.14 0.12
 -8 -2 0 1.67 0.12
 -9 -1 1 0.04 0.06
 -10 0 2 0.47 0.12
 -2 11 10 0.44 0.15
 2 -11 -10 0.41 0.12
 -1 10 9 -0.07 0.07
 1 -10 -9 -0.01 0.06
 0 9 8 11.29 0.4
 0 -9 -8 11.61 0.34
 0 -9 -8 11.04 0.38
 0 -9 -8 11.92 0.37
 1 8 7 7.57 0.28
 1 8 7 7.24 0.21
 -1 -8 -7 7.18 0.2
 -1 -8 -7 6.88 0.25
 -1 -8 -7 7.31 0.26
 -1 -8 -7 7.19 0.24
 -1 -8 -7 7.04 0.22
 2 7 6 4.92 0.19
 2 7 6 5.22 0.15
 -2 -7 -6 5.25 0.15
 -2 -7 -6 4.89 0.17
 -2 -7 -6 4.79 0.16
 -2 -7 -6 4.84 0.19
 -2 -7 -6 5.09 0.18
 3 6 5 1.12 0.07
 -3 -6 -5 1.21 0.06
 -3 -6 -5 1.08 0.07
 -3 -6 -5 1.13 0.07
 -3 -6 -5 1.26 0.06
 -3 -6 -5 1.12 0.07
 4 5 4 7.32 0.19
 -4 -5 -4 7.67 0.2
 -4 -5 -4 7.48 0.21
 -4 -5 -4 7.52 0.22
 -4 -5 -4 7.84 0.22
 -5 -4 -3 1.4 0.05
 -5 -4 -3 1.76 0.08
 -5 -4 -3 1.59 0.06
 -5 -4 -3 1.48 0.09
 -6 -3 -2 3.14 0.13
 -7 -2 -1 0.87 0.1
 -8 -1 0 0.66 0.1
 -9 0 1 0.38 0.1
 -10 1 2 -0.02 0.07
 -2 10 10 3.71 0.25
 2 -10 -10 3.26 0.19
 -1 9 9 33.98 0.92
 1 -9 -9 34.02 0.83
 0 8 8 22.66 0.64
 0 -8 -8 23.45 0.62
 0 -8 -8 22.94 0.63
 0 -8 -8 22.97 0.62
 0 -8 -8 23.42 0.58
 1 7 7 1.51 0.11
 1 7 7 1.42 0.07
 1 7 7 1.44 0.11
 -1 -7 -7 1.41 0.07
 -1 -7 -7 1.47 0.1
 -1 -7 -7 1.48 0.09
 -1 -7 -7 1.42 0.08
 -1 -7 -7 1.47 0.1
 2 6 6 9.62 0.3
 2 6 6 9.47 0.28
 2 6 6 9.74 0.23
 -2 -6 -6 9.26 0.27
 -2 -6 -6 9.51 0.23
 -2 -6 -6 9.58 0.25
 -2 -6 -6 9.24 0.28
 -2 -6 -6 9.53 0.27
 3 5 5 2.07 0.08
 3 5 5 2.18 0.08
 -3 -5 -5 2.06 0.09
 -3 -5 -5 2.21 0.1
 -3 -5 -5 2.22 0.08
 -3 -5 -5 2.17 0.09
 -4 -4 -4 1.53 0.07
 -4 -4 -4 1.47 0.05
 -4 -4 -4 1.68 0.05
 -4 -4 -4 1.62 0.08
 -5 -3 -3 53.73 1.21
 -5 -3 -3 52.53 1.16
 -5 -3 -3 51.89 1.21
 -6 -2 -2 10.06 0.28
 -6 -2 -2 9.93 0.27
 -6 -2 -2 10 0.28
 -7 -1 -1 5.67 0.21
 -8 0 0 4.94 0.22
 -9 1 1 0.65 0.12
 -2 9 10 7.35 0.34
 2 -9 -10 7.09 0.28
 -1 8 9 -0.04 0.06
 1 -8 -9 0.07 0.07
 1 -8 -9 0.1 0.05
 1 -8 -9 0 0.05
 1 -8 -9 0 0.06
 0 7 8 24.11 0.65
 0 -7 -8 23.99 0.59
 0 -7 -8 23.77 0.63
 0 -7 -8 24.25 0.64
 0 -7 -8 24.47 0.65
 1 6 7 1.73 0.12
 1 6 7 1.78 0.07
 1 6 7 1.75 0.11
 -1 -6 -7 1.92 0.11
 -1 -6 -7 1.88 0.09
 -1 -6 -7 1.79 0.07
 -1 -6 -7 1.9 0.1
 -1 -6 -7 2.29 0.1
 2 5 6 15.6 0.42
 2 5 6 15.26 0.4
 -2 -5 -6 15.81 0.4
 -2 -5 -6 16.12 0.37
 -2 -5 -6 15.52 0.34
 -2 -5 -6 15.72 0.4
 -2 -5 -6 15.31 0.39
 -3 -4 -5 5.73 0.14
 -3 -4 -5 5.26 0.16
 -3 -4 -5 5.21 0.14
 -3 -4 -5 5.72 0.18
 -4 -3 -4 8.19 0.22
 -4 -3 -4 8.07 0.21
 -4 -3 -4 8 0.21
 -5 -2 -3 72.54 1.61
 -5 -2 -3 71.22 1.55
 -6 -1 -2 0.29 0.05
 -6 -1 -2 0.37 0.05
 -6 -1 -2 0.32 0.05
 -7 0 -1 3.06 0.14
 -8 1 0 16.43 0.48
 -9 2 1 5.71 0.27
 -3 9 11 1.71 0.24
 3 -9 -11 1.72 0.2
 -2 8 10 2.43 0.25
 2 -8 -10 1.57 0.13
 -1 7 9 63.73 1.53
 1 -7 -9 64.49 1.46
 1 -7 -9 65.47 1.56
 1 -7 -9 66.81 1.51
 1 -7 -9 63.65 1.54
 0 6 8 85.36 1.93
 0 6 8 84.08 1.88
 0 -6 -8 85.41 1.81
 0 -6 -8 81.7 1.87
 0 -6 -8 82.91 1.93
 0 -6 -8 81.63 1.89
 1 5 7 4.62 0.19
 1 5 7 4.29 0.17
 1 5 7 4.45 0.11
 -1 -5 -7 4.3 0.12
 -1 -5 -7 4.32 0.15
 -1 -5 -7 4.34 0.14
 -1 -5 -7 3.93 0.16
 -1 -5 -7 4.54 0.17
 2 4 6 148.8 3.2
 2 4 6 156.76 3.15
 -2 -4 -6 146.1 3.17
 -2 -4 -6 148.4 3.35
 -2 -4 -6 150.85 3.21
 -2 -4 -6 149.82 3.28
 -3 -3 -5 94.65 2.06
 -3 -3 -5 91.31 2.04
 -3 -3 -5 88.83 1.97
 -4 -2 -4 1.17 0.05
 -5 -1 -3 0.05 0.02
 -6 0 -2 8.84 0.23
 -6 0 -2 8.96 0.25
 -6 0 -2 8.83 0.25
 -6 0 -2 8.73 0.24
 -7 1 -1 30.74 0.76
 -8 2 0 8.6 0.31
 -9 3 1 1.87 0.21
 -3 8 11 5.29 0.29
 3 -8 -11 5.03 0.24
 -2 7 10 0.06 0.08
 2 -7 -10 0.08 0.05
 2 -7 -10 0.05 0.06
 -1 6 9 0.07 0.06
 1 -6 -9 0.12 0.06
 1 -6 -9 0.09 0.07
 1 -6 -9 0.09 0.05
 1 -6 -9 0.08 0.05
 0 5 8 1.62 0.07
 0 5 8 1.56 0.11
 0 5 8 1.41 0.12
 0 -5 -8 1.45 0.11
 0 -5 -8 1.59 0.09
 0 -5 -8 1.57 0.1
 0 -5 -8 1.83 0.1
 1 4 7 3.56 0.16
 1 4 7 2.98 0.13
 -1 -4 -7 3.79 0.12
 -1 -4 -7 3.61 0.13
 -1 -4 -7 3.49 0.14
 -1 -4 -7 3.64 0.1
 -1 -4 -7 3.66 0.15
 -2 -3 -6 2.08 0.1
 -2 -3 -6 2.08 0.1
 -2 -3 -6 2.04 0.09
 -2 -3 -6 2.09 0.06
 -2 -3 -6 1.86 0.07
 -3 -2 -5 28.35 0.63
 -3 -2 -5 28.4 0.63
 -3 -2 -5 27.73 0.62
 -4 -1 -4 7.02 0.16
 -5 0 -3 6.4 0.17
 -5 0 -3 6.61 0.16
 -6 1 -2 5.94 0.18
 -6 1 -2 5.63 0.17
 -6 1 -2 5.78 0.19
 -6 1 -2 5.72 0.17
 -7 2 -1 14.07 0.4
 -7 2 -1 13.68 0.41
 -8 3 0 1.31 0.12
 -8 3 0 1.46 0.16
 -9 4 1 0.78 0.14
 -3 7 11 5.29 0.28
 3 -7 -11 5.34 0.24
 -2 6 10 0.06 0.07
 2 -6 -10 0 0.05
 2 -6 -10 -0.01 0.05
 2 -6 -10 -0.03 0.06
 2 -6 -10 -0.03 0.04
 -1 5 9 1.17 0.15
 1 -5 -9 0.82 0.1
 1 -5 -9 0.88 0.11
 1 -5 -9 0.91 0.13
 1 -5 -9 0.86 0.1
 0 4 8 3.26 0.1
 0 4 8 3.2 0.17
 0 4 8 2.97 0.14
 0 -4 -8 3.17 0.15
 0 -4 -8 3.14 0.14
 0 -4 -8 3.16 0.13
 0 -4 -8 3.06 0.14
 1 3 7 0.26 0.03
 1 3 7 0.24 0.04
 -1 -3 -7 0.21 0.04
 -1 -3 -7 0.22 0.05
 -1 -3 -7 0.2 0.04
 -1 -3 -7 0.26 0.05
 -2 -2 -6 1.55 0.08
 -2 -2 -6 1.59 0.05
 -2 -2 -6 1.59 0.06
 -3 -1 -5 0.19 0.03
 -3 -1 -5 0.17 0.02
 -5 1 -3 8.74 0.21
 -5 1 -3 9.02 0.22
 -6 2 -2 5.67 0.19
 -6 2 -2 5.8 0.19
 -6 2 -2 5.8 0.17
 -7 3 -1 13.57 0.4
 -7 3 -1 13.32 0.4
 -8 4 0 1.63 0.18
 -8 4 0 1.57 0.18
 -4 7 12 2.9 0.31
 4 -7 -12 2.63 0.18
 -3 6 11 0.73 0.15
 3 -6 -11 0.83 0.13
 -2 5 10 0.89 0.14
 2 -5 -10 1.15 0.13
 2 -5 -10 1.05 0.14
 2 -5 -10 0.91 0.11
 2 -5 -10 0.92 0.15
 -1 4 9 0.18 0.07
 1 -4 -9 0.02 0.04
 1 -4 -9 0.27 0.06
 0 3 8 0.33 0.08
 0 3 8 0.33 0.03
 0 -3 -8 0.17 0.04
 0 -3 -8 0.36 0.07
 0 -3 -8 0.44 0.06
 0 -3 -8 0.24 0.05
 1 2 7 1.78 0.06
 1 2 7 1.64 0.06
 -1 -2 -7 1.7 0.08
 -1 -2 -7 1.71 0.08
 -1 -2 -7 1.77 0.1
 -1 -2 -7 1.82 0.1
 -2 -1 -6 0.82 0.03
 -2 -1 -6 0.72 0.04
 -2 -1 -6 0.67 0.05
 -2 -1 -6 0.75 0.05
 -3 0 -5 14.15 0.33
 -3 0 -5 14.02 0.33
 -4 1 -4 20.49 0.45
 -5 2 -3 15.04 0.36
 -5 2 -3 15.67 0.38
 -5 2 -3 15.25 0.35
 -6 3 -2 51.31 1.18
 -6 3 -2 52.61 1.22
 -7 4 -1 2.63 0.15
 -7 4 -1 2.62 0.15
 -8 5 0 2.06 0.16
 -8 5 0 1.88 0.16
 -4 6 12 0.27 0.13
 4 -6 -12 0.17 0.09
 -3 5 11 0.13 0.08
 3 -5 -11 -0.03 0.04
 3 -5 -11 0.06 0.06
 -2 4 10 1.28 0.15
 2 -4 -10 1.18 0.1
 2 -4 -10 1.01 0.1
 2 -4 -10 1.68 0.19
 2 -4 -10 1.27 0.1
 -1 3 9 7.41 0.26
 1 -3 -9 7.86 0.25
 1 -3 -9 7.71 0.27
 1 -3 -9 7.79 0.29
 1 -3 -9 7.9 0.27
 0 2 8 4.76 0.2
 0 2 8 4.79 0.12
 0 -2 -8 5.15 0.17
 0 -2 -8 4.79 0.18
 0 -2 -8 4.94 0.18
 0 -2 -8 4.8 0.19
 -1 -1 -7 18.03 0.43
 -1 -1 -7 18.11 0.47
 -1 -1 -7 18.87 0.49
 -2 0 -6 39.47 0.91
 -2 0 -6 38.75 0.89
 -2 0 -6 40.05 0.9
 -2 0 -6 40.11 0.92
 -3 1 -5 4.9 0.14
 -3 1 -5 5.12 0.13
 -3 1 -5 4.96 0.12
 -4 2 -4 1.58 0.06
 -4 2 -4 1.61 0.06
 -4 2 -4 1.52 0.05
 -5 3 -3 9.16 0.24
 -5 3 -3 9.23 0.24
 -5 3 -3 9.64 0.27
 -6 4 -2 3.38 0.16
 -6 4 -2 3.67 0.16
 -7 5 -1 4.14 0.21
 -7 5 -1 4.41 0.21
 -4 5 12 0.13 0.1
 4 -5 -12 0.16 0.08
 -3 4 11 0.33 0.1
 3 -4 -11 0.41 0.09
 3 -4 -11 0.31 0.08
 3 -4 -11 0.29 0.1
 3 -4 -11 0.62 0.12
 -2 3 10 15.29 0.46
 2 -3 -10 15.02 0.45
 2 -3 -10 15.16 0.47
 2 -3 -10 15.81 0.44
 2 -3 -10 14.99 0.48
 -1 2 9 3.06 0.15
 1 -2 -9 3.01 0.16
 1 -2 -9 3.35 0.14
 1 -2 -9 2.99 0.15
 1 -2 -9 3.33 0.15
 0 1 8 47.32 0.91
 0 1 8 47.07 1.02
 0 1 8 46.56 0.99
 0 1 8 46.9 1.09
 0 -1 -8 44.8 1.05
 0 -1 -8 45.46 1.08
 0 -1 -8 44.42 1.1
 -1 0 -7 9.75 0.28
 -1 0 -7 9.63 0.24
 -1 0 -7 9.93 0.3
 -2 1 -6 55.85 1.25
 -2 1 -6 54.21 1.25
 -2 1 -6 55.56 1.22
 -2 1 -6 53.71 1.21
 -3 2 -5 27.53 0.64
 -3 2 -5 27.22 0.62
 -3 2 -5 27.31 0.63
 -4 3 -4 0.54 0.06
 -4 3 -4 0.49 0.05
 -4 3 -4 0.4 0.03
 -5 4 -3 3.23 0.14
 -6 5 -2 5.29 0.22
 -7 6 -1 5.57 0.26
 -7 6 -1 5.98 0.26
 -4 4 12 15.69 0.54
 4 -4 -12 16.24 0.5
 -3 3 11 0.32 0.1
 3 -3 -11 0.44 0.09
 3 -3 -11 0.47 0.11
 3 -3 -11 0.58 0.11
 3 -3 -11 0.33 0.08
 -2 2 10 7.12 0.27
 2 -2 -10 6.94 0.29
 2 -2 -10 7.1 0.25
 2 -2 -10 7.01 0.27
 2 -2 -10 7 0.26
 1 -1 -9 1.4 0.1
 1 -1 -9 1.24 0.09
 1 -1 -9 1.21 0.1
 0 0 8 1.17 0.06
 0 0 -8 1.1 0.07
 0 0 -8 1.48 0.1
 0 0 -8 1.06 0.08
 -1 1 -7 0.4 0.07
 -1 1 -7 0.53 0.07
 -1 1 -7 0.37 0.03
 -2 2 -6 17.01 0.43
 -2 2 -6 17.11 0.43
 -2 2 -6 16.47 0.43
 -3 3 -5 3.46 0.12
 -3 3 -5 3.55 0.13
 -3 3 -5 3.53 0.13
 -4 4 -4 10.16 0.3
 -5 5 -3 0.26 0.07
 -6 6 -2 -0.03 0.04
 -7 7 -1 3.29 0.2
 -4 3 12 0.76 0.15
 4 -3 -12 0.85 0.14
 -3 2 11 0.06 0.07
 3 -2 -11 0.1 0.06
 3 -2 -11 -0.03 0.05
 3 -2 -11 0.05 0.08
 3 -2 -11 0.14 0.06
 -2 1 10 2.9 0.15
 2 -1 -10 3.04 0.18
 2 -1 -10 2.95 0.16
 2 -1 -10 3.01 0.17
 1 0 -9 5.08 0.21
 1 0 -9 4.58 0.19
 1 0 -9 4.55 0.21
 0 -1 8 0.05 0.02
 0 -1 8 0.02 0.02
 0 1 -8 0 0.03
 0 1 -8 0.04 0.03
 0 1 -8 0 0.03
 -1 2 -7 0.59 0.04
 -2 3 -6 21.23 0.54
 -3 4 -5 2.28 0.11
 -4 5 -4 7.54 0.26
 -5 6 -3 1.21 0.14
 -6 7 -2 0.01 0.06
 -5 3 13 2.58 0.28
 5 -3 -13 1.96 0.17
 -4 2 12 1.23 0.18
 4 -2 -12 1.02 0.14
 4 -2 -12 1.12 0.16
 -3 1 11 1.5 0.17
 3 -1 -11 1.58 0.18
 3 -1 -11 1.06 0.13
 3 -1 -11 1.66 0.19
 3 -1 -11 1.21 0.16
 -2 0 10 1.19 0.1
 2 0 -10 1.35 0.11
 2 0 -10 1.34 0.11
 2 0 -10 1.44 0.12
 -1 -1 9 6.15 0.19
 1 1 -9 5.89 0.24
 1 1 -9 6.49 0.24
 1 1 -9 5.91 0.22
 0 -2 8 3.14 0.09
 0 2 -8 2.81 0.15
 0 2 -8 3.06 0.15
 0 2 -8 3.27 0.13
 -1 3 -7 10.31 0.26
 -2 4 -6 1.05 0.08
 -3 5 -5 7.22 0.26
 -4 6 -4 0.95 0.12
 -5 7 -3 0.34 0.09
 -5 2 13 0.52 0.14
 5 -2 -13 0.55 0.13
 -4 1 12 1.74 0.15
 4 -1 -12 1.69 0.14
 4 -1 -12 2.04 0.15
 -3 0 11 2.73 0.16
 3 0 -11 2.9 0.18
 3 0 -11 2.54 0.16
 3 0 -11 2.52 0.18
 -2 -1 10 3.18 0.14
 2 1 -10 3.36 0.18
 2 1 -10 3.24 0.17
 2 1 -10 3.34 0.19
 -1 -2 9 10.84 0.29
 1 2 -9 11.91 0.37
 1 2 -9 11.14 0.34
 1 2 -9 11.14 0.37
 0 -3 8 -0.03 0.02
 0 3 -8 -0.03 0.03
 0 3 -8 -0.04 0.04
 -1 4 -7 23.1 0.62
 -1 4 -7 22.98 0.54
 -2 5 -6 0.06 0.05
 -3 6 -5 5.87 0.25
 -4 7 -4 0.01 0.06
 -5 8 -3 0.03 0.06
 -4 0 12 1.92 0.15
 4 0 -12 2.15 0.16
 -3 -1 11 5.46 0.22
 3 1 -11 4.87 0.24
 3 1 -11 5.12 0.26
 3 1 -11 5.09 0.25
 -2 -2 10 1.41 0.09
 2 2 -10 1.41 0.12
 2 2 -10 1.21 0.11
 2 2 -10 1.41 0.13
 -1 -3 9 3.39 0.09
 -1 -3 9 3.56 0.12
 1 3 -9 3.55 0.18
 1 3 -9 3.52 0.16
 0 -4 8 14.96 0.33
 0 -4 8 15.82 0.34
 0 4 -8 14.8 0.46
 0 4 -8 14.52 0.4
 -1 5 -7 0.97 0.06
 -1 5 -7 1.01 0.1
 -2 6 -6 4.36 0.21
 -3 7 -5 1.27 0.12
 -4 8 -4 0.09 0.07
 -4 -1 12 0.09 0.08
 4 1 -12 0.19 0.08
 -3 -2 11 7.47 0.26
 3 2 -11 7.65 0.31
 3 2 -11 8.01 0.33
 -2 -3 10 1.24 0.08
 2 3 -10 1.21 0.14
 2 3 -10 1.79 0.19
 -1 -4 9 25.72 0.58
 -1 -4 9 25.03 0.5
 1 4 -9 25.49 0.66
 1 4 -9 25.86 0.72
 0 5 -8 8.4 0.32
 0 5 -8 8.74 0.27
 -1 6 -7 0.02 0.03
 -1 6 -7 0.12 0.07
 -2 7 -6 0.8 0.14
 -3 8 -5 -0.01 0.06
 -4 -2 12 13.65 0.42
 4 2 -12 14.04 0.48
 -3 -3 11 3.99 0.17
 3 3 -11 3.91 0.23
 3 3 -11 4.11 0.22
 -2 -4 10 41.53 0.95
 2 4 -10 42.84 1.06
 2 4 -10 42.08 1.12
 -1 -5 9 43.5 0.97
 1 5 -9 45.15 1.17
 1 5 -9 45.67 1.09
 0 6 -8 1.08 0.09
 0 6 -8 1.5 0.18
 -1 7 -7 1.83 0.16
 -1 7 -7 1.69 0.1
 -2 8 -6 3.37 0.21
 -3 9 -5 0.44 0.12
 -4 -3 12 0.22 0.08
 4 3 -12 0.05 0.07
 -3 -4 11 1.42 0.1
 3 4 -11 1.63 0.21
 3 4 -11 1.5 0.14
 -2 -5 10 1.74 0.07
 -2 -5 10 1.83 0.1
 2 5 -10 1.94 0.17
 2 5 -10 1.89 0.14
 -1 -6 9 1.98 0.08
 1 6 -9 2.1 0.14
 1 6 -9 1.91 0.17
 0 7 -8 13.11 0.47
 0 7 -8 12.32 0.38
 -1 8 -7 7.12 0.33
 -1 8 -7 6.84 0.24
 -2 9 -6 0.5 0.13
 -3 -5 11 0 0.05
 3 5 -11 0.02 0.06
 3 5 -11 -0.05 0.08
 -2 -6 10 0.13 0.02
 -2 -6 10 0.1 0.05
 2 6 -10 0.12 0.07
 2 6 -10 0.15 0.1
 -1 -7 9 0.23 0.04
 1 7 -9 0.14 0.07
 1 7 -9 0.16 0.1
 0 8 -8 1.46 0.21
 7 12 2 0.23 0.1
 8 11 1 7.64 0.3
 -8 -11 -1 7.84 0.34
 -8 -11 -1 7.88 0.32
 5 13 4 1.32 0.19
 -5 -13 -4 1.01 0.11
 6 12 3 0.84 0.15
 -6 -12 -3 0.63 0.12
 -6 -12 -3 0.61 0.13
 7 11 2 3.18 0.19
 -7 -11 -2 3.32 0.21
 -7 -11 -2 3.41 0.19
 8 10 1 3.37 0.18
 -8 -10 -1 3.5 0.2
 -8 -10 -1 3.69 0.22
 9 9 0 3.37 0.16
 -9 -9 0 3.45 0.21
 -9 -9 0 3.21 0.2
 4 13 5 0.02 0.08
 -4 -13 -5 -0.06 0.05
 5 12 4 1.34 0.18
 -5 -12 -4 1.39 0.17
 -5 -12 -4 1.52 0.17
 6 11 3 4.9 0.23
 -6 -11 -3 4.88 0.24
 -6 -11 -3 4.57 0.22
 7 10 2 0.02 0.06
 -7 -10 -2 0.1 0.08
 -7 -10 -2 0.07 0.07
 8 9 1 4.14 0.18
 -8 -9 -1 4.37 0.22
 -8 -9 -1 4.41 0.22
 9 8 0 1.79 0.1
 -9 -8 0 2.03 0.15
 -9 -8 0 1.92 0.15
 -10 -7 1 0.19 0.09
 -10 -7 1 0.29 0.1
 3 13 6 2.42 0.2
 -3 -13 -6 2.75 0.13
 -3 -13 -6 2.85 0.15
 4 12 5 0.97 0.15
 -4 -12 -5 1.11 0.11
 5 11 4 11.2 0.39
 -5 -11 -4 12.11 0.4
 -5 -11 -4 11.86 0.38
 6 10 3 20.23 0.56
 -6 -10 -3 19.46 0.57
 -6 -10 -3 21.05 0.59
 7 9 2 0.81 0.11
 -7 -9 -2 0.71 0.11
 -7 -9 -2 0.74 0.12
 8 8 1 0.03 0.04
 -8 -8 -1 0.02 0.05
 -8 -8 -1 -0.01 0.06
 -9 -7 0 0.02 0.06
 -9 -7 0 -0.01 0.06
 -10 -6 1 0.79 0.14
 -10 -6 1 0.81 0.13
 2 13 7 8.64 0.38
 -2 -13 -7 9.23 0.27
 -2 -13 -7 9.82 0.31
 3 12 6 8.6 0.34
 -3 -12 -6 7.98 0.27
 -3 -12 -6 7.9 0.24
 4 11 5 1.79 0.19
 -4 -11 -5 1.16 0.1
 -4 -11 -5 1.25 0.09
 -4 -11 -5 1.24 0.11
 5 10 4 8.03 0.29
 -5 -10 -4 7.96 0.3
 -5 -10 -4 8.04 0.29
 6 9 3 18.52 0.51
 -6 -9 -3 19.62 0.55
 -6 -9 -3 19.09 0.54
 7 8 2 1.09 0.08
 -7 -8 -2 1.22 0.11
 -7 -8 -2 0.98 0.1
 8 7 1 0.41 0.05
 -8 -7 -1 0.32 0.08
 -8 -7 -1 0.41 0.09
 -9 -6 0 0.81 0.13
 -9 -6 0 0.92 0.13
 -10 -5 1 0.89 0.14
 -10 -5 1 1.29 0.18
 1 13 8 2.9 0.22
 -1 -13 -8 3.1 0.17
 2 12 7 16.1 0.53
 -2 -12 -7 15.98 0.4
 -2 -12 -7 15.86 0.44
 3 11 6 1.81 0.15
 -3 -11 -6 1.87 0.11
 -3 -11 -6 1.83 0.1
 -3 -11 -6 2.01 0.13
 -3 -11 -6 1.98 0.14
 4 10 5 20.15 0.56
 -4 -10 -5 20.32 0.47
 -4 -10 -5 19.67 0.56
 -4 -10 -5 20.4 0.55
 5 9 4 15.1 0.42
 -5 -9 -4 14.39 0.43
 -5 -9 -4 14.92 0.44
 6 8 3 52.35 1.2
 -6 -8 -3 53.8 1.28
 -6 -8 -3 53.3 1.25
 7 7 2 0.07 0.03
 -7 -7 -2 0.24 0.07
 -7 -7 -2 0 0.05
 -8 -6 -1 5.75 0.24
 -8 -6 -1 5.44 0.22
 -9 -5 0 1 0.13
 -9 -5 0 0.71 0.12
 -10 -4 1 1.56 0.15
 -10 -4 1 1.67 0.14
 1 12 8 10.11 0.4
 -1 -12 -8 9.61 0.32
 2 11 7 10.61 0.39
 -2 -11 -7 11.4 0.3
 -2 -11 -7 10.89 0.32
 -2 -11 -7 10.7 0.36
 -2 -11 -7 11.4 0.36
 3 10 6 3.71 0.19
 -3 -10 -6 3.69 0.18
 -3 -10 -6 3.89 0.17
 -3 -10 -6 3.66 0.14
 -3 -10 -6 3.98 0.16
 4 9 5 2.6 0.14
 -4 -9 -5 2.75 0.14
 -4 -9 -5 2.92 0.15
 -4 -9 -5 2.9 0.11
 5 8 4 4.8 0.18
 -5 -8 -4 4.83 0.19
 -5 -8 -4 4.68 0.19
 6 7 3 59.17 1.28
 -6 -7 -3 58.96 1.39
 -6 -7 -3 57.98 1.35
 -7 -6 -2 5.29 0.2
 -7 -6 -2 5.16 0.21
 -8 -5 -1 13.17 0.42
 -8 -5 -1 12.95 0.39
 -9 -4 0 7.69 0.29
 -9 -4 0 8.2 0.32
 -10 -3 1 4.83 0.24
 0 12 9 3.16 0.23
 0 -12 -9 3.12 0.18
 1 11 8 0.01 0.08
 -1 -11 -8 0.01 0.06
 2 10 7 0.04 0.06
 -2 -10 -7 0.14 0.06
 -2 -10 -7 0.01 0.05
 -2 -10 -7 0.07 0.06
 -2 -10 -7 0.22 0.05
 3 9 6 5.85 0.24
 -3 -9 -6 6.36 0.22
 -3 -9 -6 6.26 0.19
 -3 -9 -6 6.24 0.22
 -3 -9 -6 6.35 0.23
 -4 -8 -5 9.01 0.29
 -4 -8 -5 9.17 0.24
 -4 -8 -5 9.29 0.29
 5 7 4 3.39 0.13
 -5 -7 -4 3.53 0.15
 -5 -7 -4 3.48 0.15
 -6 -6 -3 0.94 0.08
 -6 -6 -3 0.93 0.07
 -7 -5 -2 10.97 0.32
 -7 -5 -2 11.11 0.35
 -8 -4 -1 7.88 0.27
 -8 -4 -1 8.18 0.3
 -9 -3 0 0.05 0.05
 -10 -2 1 0.38 0.1
 0 11 9 0.94 0.17
 0 -11 -9 0.69 0.12
 1 10 8 2.02 0.16
 -1 -10 -8 2.04 0.12
 -1 -10 -8 2.28 0.14
 -1 -10 -8 2.08 0.15
 2 9 7 0.08 0.06
 -2 -9 -7 0.13 0.05
 -2 -9 -7 0.09 0.05
 -2 -9 -7 0.05 0.03
 -2 -9 -7 0.05 0.05
 3 8 6 0.22 0.06
 -3 -8 -6 0.35 0.06
 -3 -8 -6 0.25 0.06
 -3 -8 -6 0.28 0.05
 -3 -8 -6 0.31 0.07
 4 7 5 0.67 0.06
 -4 -7 -5 0.8 0.07
 -4 -7 -5 0.71 0.06
 -4 -7 -5 0.69 0.06
 5 6 4 0.53 0.03
 5 6 4 0.57 0.04
 -5 -6 -4 0.7 0.08
 -5 -6 -4 0.68 0.08
 -5 -6 -4 0.54 0.05
 -7 -4 -2 2.4 0.13
 -7 -4 -2 2.4 0.12
 -8 -3 -1 2.51 0.14
 -9 -2 0 0.03 0.05
 -10 -1 1 1.35 0.17
 -1 11 10 1.01 0.19
 1 -11 -10 0.79 0.13
 0 10 9 23.82 0.7
 0 -10 -9 24.24 0.63
 1 9 8 51.5 1.27
 -1 -9 -8 53.03 1.26
 -1 -9 -8 54.1 1.19
 -1 -9 -8 53.16 1.27
 -1 -9 -8 52.07 1.09
 2 8 7 0.52 0.09
 -2 -8 -7 0.47 0.07
 -2 -8 -7 0.4 0.07
 -2 -8 -7 0.4 0.07
 -2 -8 -7 0.46 0.08
 -2 -8 -7 0.44 0.05
 -3 -7 -6 44.07 0.91
 -3 -7 -6 44.12 1.03
 -3 -7 -6 44.36 1.02
 -3 -7 -6 43.84 1.04
 4 6 5 5.31 0.16
 4 6 5 5.29 0.15
 -4 -6 -5 5.11 0.18
 -4 -6 -5 5.34 0.18
 -4 -6 -5 5.25 0.17
 -4 -6 -5 5.53 0.16
 -5 -5 -4 0.04 0.02
 -5 -5 -4 0.01 0.02
 -6 -4 -3 2.52 0.08
 -6 -4 -3 2.64 0.08
 -6 -4 -3 2.58 0.12
 -7 -3 -2 0.32 0.06
 -8 -2 -1 10.28 0.32
 -9 -1 0 4.01 0.2
 -10 0 1 0.35 0.1
 -1 10 10 2.15 0.19
 1 -10 -10 2.29 0.15
 0 9 9 19.84 0.6
 0 -9 -9 19.99 0.53
 0 -9 -9 19.58 0.57
 0 -9 -9 19.88 0.57
 0 -9 -9 19.98 0.59
 1 8 8 2.45 0.15
 -1 -8 -8 2.32 0.13
 -1 -8 -8 2.39 0.14
 -1 -8 -8 2.54 0.1
 -1 -8 -8 2.41 0.12
 -1 -8 -8 2.37 0.14
 2 7 7 41.39 1.03
 -2 -7 -7 42.89 1.02
 -2 -7 -7 43.97 1.03
 -2 -7 -7 43.66 0.89
 -2 -7 -7 44.71 1.01
 3 6 6 49.52 1.04
 3 6 6 47.96 1.06
 -3 -6 -6 48.07 1.11
 -3 -6 -6 46.66 0.97
 -3 -6 -6 47.24 1.08
 -3 -6 -6 46.53 1.08
 -4 -5 -5 1.1 0.06
 -4 -5 -5 1.03 0.08
 -4 -5 -5 1.14 0.05
 -4 -5 -5 1.17 0.07
 -5 -4 -4 0.06 0.03
 -5 -4 -4 0.05 0.03
 -6 -3 -3 4.56 0.15
 -6 -3 -3 4.35 0.16
 -7 -2 -2 3.06 0.13
 -8 -1 -1 1.59 0.11
 -9 0 0 0.11 0.07
 -10 1 1 2.03 0.16
 -2 10 11 11.11 0.46
 2 -10 -11 11.85 0.4
 -1 9 10 0.96 0.17
 1 -9 -10 0.53 0.1
 1 -9 -10 0.72 0.12
 0 8 9 30.8 0.82
 0 -8 -9 31.13 0.75
 0 -8 -9 30.93 0.81
 0 -8 -9 30.44 0.82
 0 -8 -9 31.26 0.8
 1 7 8 10.15 0.33
 -1 -7 -8 10.06 0.32
 -1 -7 -8 9.95 0.28
 -1 -7 -8 10.1 0.25
 -1 -7 -8 9.84 0.31
 -1 -7 -8 10.14 0.32
 2 6 7 0.72 0.1
 -2 -6 -7 0.7 0.06
 -2 -6 -7 0.6 0.05
 -2 -6 -7 0.69 0.08
 -2 -6 -7 0.53 0.04
 -2 -6 -7 0.54 0.05
 3 5 6 4.67 0.13
 -3 -5 -6 4.59 0.16
 -3 -5 -6 4.8 0.13
 -3 -5 -6 4.75 0.15
 -3 -5 -6 4.75 0.15
 -4 -4 -5 4.61 0.14
 -4 -4 -5 3.67 0.13
 -4 -4 -5 5.12 0.16
 -5 -3 -4 25.3 0.6
 -5 -3 -4 25.4 0.57
 -5 -3 -4 24.7 0.59
 -6 -2 -3 11.08 0.29
 -6 -2 -3 11.59 0.3
 -7 -1 -2 12.29 0.34
 -8 0 -1 16.33 0.46
 -9 1 0 2.22 0.15
 -2 9 11 0.54 0.14
 2 -9 -11 0.32 0.1
 -1 8 10 2.25 0.17
 1 -8 -10 2.17 0.13
 1 -8 -10 1.92 0.15
 1 -8 -10 2.25 0.14
 1 -8 -10 1.98 0.16
 0 7 9 15.94 0.49
 0 -7 -9 16.82 0.5
 0 -7 -9 16.7 0.48
 0 -7 -9 16.3 0.44
 0 -7 -9 16.05 0.47
 1 6 8 1.06 0.12
 -1 -6 -8 0.82 0.06
 -1 -6 -8 0.92 0.1
 -1 -6 -8 0.82 0.07
 -1 -6 -8 0.76 0.05
 -1 -6 -8 0.79 0.07
 2 5 7 17.11 0.44
 2 5 7 17.75 0.41
 -2 -5 -7 17.53 0.44
 -2 -5 -7 17.55 0.38
 -2 -5 -7 18.62 0.43
 -2 -5 -7 17.29 0.45
 -2 -5 -7 17.89 0.45
 -3 -4 -6 26.29 0.6
 -3 -4 -6 27.62 0.67
 -3 -4 -6 26.3 0.62
 -3 -4 -6 27.93 0.59
 -4 -3 -5 40.74 0.91
 -4 -3 -5 40.67 0.93
 -4 -3 -5 39.97 0.89
 -5 -2 -4 83.7 1.86
 -5 -2 -4 84.98 1.8
 -6 -1 -3 0.77 0.04
 -6 -1 -3 0.74 0.05
 -6 -1 -3 0.79 0.05
 -7 0 -2 73.37 1.63
 -8 1 -1 24.85 0.65
 -9 2 0 0.05 0.07
 -3 9 12 0.09 0.11
 -2 8 11 0.07 0.09
 2 -8 -11 0.26 0.09
 -1 7 10 1.71 0.15
 1 -7 -10 1.93 0.13
 1 -7 -10 1.69 0.15
 1 -7 -10 1.91 0.14
 1 -7 -10 1.91 0.12
 0 6 9 5.69 0.24
 0 -6 -9 5.86 0.22
 0 -6 -9 5.63 0.24
 0 -6 -9 5.76 0.22
 0 -6 -9 5.58 0.2
 1 5 8 15.3 0.45
 -1 -5 -8 14.81 0.41
 -1 -5 -8 14.33 0.42
 -1 -5 -8 15.31 0.37
 -1 -5 -8 14.9 0.41
 2 4 7 39.58 0.82
 2 4 7 37.89 0.84
 -2 -4 -7 37.14 0.87
 -2 -4 -7 38.58 0.89
 -2 -4 -7 39.1 0.89
 -2 -4 -7 38.61 0.78
 -3 -3 -6 22.06 0.54
 -3 -3 -6 21.11 0.5
 -3 -3 -6 22.07 0.51
 -4 -2 -5 14.34 0.32
 -4 -2 -5 13.52 0.32
 -5 -1 -4 22.91 0.5
 -6 0 -3 25.8 0.58
 -6 0 -3 24.92 0.58
 -6 0 -3 25.25 0.58
 -6 0 -3 25.55 0.59
 -7 1 -2 9.75 0.29
 -7 1 -2 9.11 0.28
 -8 2 -1 -0.01 0.05
 -9 3 0 6.21 0.28
 -3 8 12 1.63 0.23
 3 -8 -12 1.54 0.19
 -2 7 11 0.01 0.07
 2 -7 -11 -0.03 0.05
 2 -7 -11 0.01 0.04
 -1 6 10 1.71 0.14
 1 -6 -10 1.7 0.11
 1 -6 -10 1.41 0.12
 1 -6 -10 1.64 0.12
 1 -6 -10 1.72 0.14
 0 5 9 11.15 0.35
 0 -5 -9 10.9 0.34
 0 -5 -9 11.01 0.34
 0 -5 -9 10.69 0.35
 0 -5 -9 10.92 0.31
 1 4 8 0.99 0.05
 1 4 8 0.85 0.07
 1 4 8 1.06 0.09
 -1 -4 -8 0.88 0.08
 -1 -4 -8 0.94 0.06
 -1 -4 -8 1.02 0.07
 -1 -4 -8 0.91 0.07
 -2 -3 -7 42.09 0.96
 -2 -3 -7 42.09 0.93
 -2 -3 -7 42.98 0.84
 -2 -3 -7 42.12 0.98
 -3 -2 -6 42.25 0.94
 -3 -2 -6 43.24 0.95
 -3 -2 -6 42.21 0.95
 -4 -1 -5 0.43 0.02
 -4 -1 -5 0.42 0.02
 -6 1 -3 0.08 0.03
 -6 1 -3 0.1 0.03
 -6 1 -3 0.13 0.03
 -6 1 -3 0.09 0.02
 -7 2 -2 25.46 0.63
 -7 2 -2 24.03 0.62
 -8 3 -1 6.94 0.27
 -8 3 -1 7 0.27
 -3 7 12 0.26 0.13
 3 -7 -12 0.21 0.09
 -2 6 11 4.17 0.23
 2 -6 -11 4.12 0.22
 2 -6 -11 4.16 0.2
 2 -6 -11 4.08 0.2
 2 -6 -11 4.38 0.24
 -1 5 10 0.07 0.06
 1 -5 -10 0.08 0.05
 1 -5 -10 0.14 0.06
 1 -5 -10 0.06 0.06
 0 -4 -9 16.86 0.49
 0 -4 -9 16.46 0.47
 0 -4 -9 16.8 0.43
 0 -4 -9 16.88 0.46
 1 3 8 2.52 0.08
 1 3 8 2.43 0.1
 -1 -3 -8 2.32 0.11
 -1 -3 -8 2.54 0.13
 -1 -3 -8 2.53 0.11
 -1 -3 -8 2.48 0.13
 -2 -2 -7 9.36 0.25
 -2 -2 -7 9.27 0.22
 -2 -2 -7 9.92 0.28
 -2 -2 -7 9.81 0.21
 -3 -1 -6 5.05 0.13
 -3 -1 -6 4.94 0.15
 -3 -1 -6 4.75 0.14
 -4 0 -5 0.45 0.02
 -4 0 -5 0.48 0.02
 -5 1 -4 0.15 0.02
 -6 2 -3 0.12 0.04
 -6 2 -3 0.07 0.03
 -6 2 -3 0.09 0.03
 -6 2 -3 0.07 0.02
 -7 3 -2 0.05 0.04
 -7 3 -2 0.03 0.05
 -8 4 -1 3.42 0.19
 -8 4 -1 3.32 0.19
 -3 6 12 1.17 0.18
 3 -6 -12 1.31 0.16
 -2 5 11 1.21 0.16
 2 -5 -11 1.3 0.18
 2 -5 -11 1.12 0.11
 2 -5 -11 1.3 0.16
 2 -5 -11 1.47 0.16
 -1 4 10 9.9 0.34
 1 -4 -10 10.3 0.33
 1 -4 -10 9.85 0.31
 1 -4 -10 10.36 0.36
 1 -4 -10 9.98 0.34
 0 3 9 1.09 0.05
 0 -3 -9 1.37 0.1
 0 -3 -9 1.31 0.09
 0 -3 -9 1.16 0.09
 1 2 8 11.8 0.28
 -1 -2 -8 12.38 0.34
 -1 -2 -8 11.85 0.32
 -1 -2 -8 12.25 0.35
 -1 -2 -8 12.3 0.37
 -2 -1 -7 0.17 0.03
 -2 -1 -7 0.21 0.04
 -2 -1 -7 0.2 0.05
 -3 0 -6 4.61 0.15
 -3 0 -6 4.49 0.13
 -3 0 -6 4.79 0.12
 -3 0 -6 4.66 0.14
 -4 1 -5 0.42 0.03
 -5 2 -4 0.75 0.04
 -5 2 -4 0.74 0.03
 -5 2 -4 0.74 0.04
 -6 3 -3 0.17 0.05
 -6 3 -3 0.2 0.05
 -7 4 -2 2.11 0.13
 -7 4 -2 1.93 0.12
 -8 5 -1 0.06 0.07
 -8 5 -1 -0.01 0.06
 -4 6 13 2.8 0.22
 4 -6 -13 2.28 0.17
 -3 5 12 0.37 0.11
 3 -5 -12 0.43 0.11
 3 -5 -12 0.35 0.08
 -2 4 11 7.51 0.3
 2 -4 -11 7.07 0.27
 2 -4 -11 7.27 0.31
 2 -4 -11 7 0.29
 2 -4 -11 7.11 0.28
 -1 3 10 8.5 0.29
 1 -3 -10 8.27 0.32
 1 -3 -10 8.6 0.29
 1 -3 -10 8.6 0.3
 0 2 9 0.11 0.02
 0 2 9 0.08 0.04
 0 -2 -9 0.03 0.04
 0 -2 -9 0.15 0.04
 0 -2 -9 0.1 0.05
 -1 -1 -8 6.85 0.2
 -1 -1 -8 6.87 0.24
 -1 -1 -8 6.73 0.23
 -1 -1 -8 6.86 0.25
 -2 0 -7 0.27 0.05
 -2 0 -7 0.34 0.05
 -2 0 -7 0.23 0.05
 -3 1 -6 0.33 0.05
 -3 1 -6 0.27 0.03
 -3 1 -6 0.2 0.03
 -4 2 -5 1.49 0.05
 -4 2 -5 1.49 0.06
 -4 2 -5 1.39 0.06
 -5 3 -4 5.01 0.16
 -5 3 -4 4.67 0.15
 -6 4 -3 2.38 0.13
 -7 5 -2 0.84 0.12
 -7 5 -2 1.07 0.13
 -4 5 13 15.96 0.56
 4 -5 -13 15.43 0.5
 -3 4 12 0.33 0.1
 3 -4 -12 0.52 0.11
 3 -4 -12 0.45 0.1
 -2 3 11 13.04 0.42
 2 -3 -11 12.78 0.41
 2 -3 -11 12.98 0.43
 2 -3 -11 12.91 0.45
 -1 2 10 2.73 0.14
 1 -2 -10 3.16 0.17
 1 -2 -10 2.75 0.15
 1 -2 -10 3.12 0.16
 0 1 9 36.37 0.79
 0 -1 -9 34.35 0.84
 0 -1 -9 35.38 0.88
 0 -1 -9 35.88 0.89
 -1 0 -8 5.99 0.17
 -1 0 -8 5.78 0.21
 -2 1 -7 10.67 0.3
 -2 1 -7 10.1 0.3
 -2 1 -7 9.99 0.28
 -3 2 -6 7.52 0.21
 -3 2 -6 7.35 0.22
 -3 2 -6 7.4 0.2
 -4 3 -5 0.19 0.04
 -4 3 -5 0.23 0.04
 -5 4 -4 1.07 0.08
 -6 5 -3 2.79 0.15
 -7 6 -2 0.54 0.11
 -7 6 -2 0.52 0.11
 -4 4 13 0.19 0.11
 4 -4 -13 0.37 0.12
 -3 3 12 17.24 0.54
 3 -3 -12 16.93 0.57
 3 -3 -12 16.44 0.54
 3 -3 -12 16.98 0.52
 -2 2 11 0.04 0.06
 2 -2 -11 0 0.05
 2 -2 -11 0.09 0.05
 2 -2 -11 0.24 0.09
 -1 1 10 1.45 0.09
 1 -1 -10 1.36 0.12
 1 -1 -10 1.5 0.11
 1 -1 -10 1.43 0.1
 0 0 9 29.09 0.64
 0 0 -9 29.98 0.74
 0 0 -9 28.55 0.7
 0 0 -9 27.57 0.73
 -1 1 -8 1.85 0.11
 -1 1 -8 1.79 0.08
 -2 2 -7 12.8 0.35
 -3 3 -6 3.3 0.13
 -4 4 -5 3.07 0.14
 -5 5 -4 12.47 0.38
 -6 6 -3 0.5 0.1
 -4 3 13 0.37 0.12
 4 -3 -13 0.32 0.11
 -3 2 12 9.97 0.36
 3 -2 -12 9.97 0.38
 3 -2 -12 9.81 0.36
 3 -2 -12 9.49 0.39
 -2 1 11 24.54 0.64
 2 -1 -11 24.7 0.68
 2 -1 -11 24.91 0.71
 2 -1 -11 25.59 0.71
 -1 0 10 4.27 0.15
 1 0 -10 4.25 0.19
 1 0 -10 4.17 0.2
 1 0 -10 4.33 0.2
 0 -1 9 7.45 0.18
 0 1 -9 7.12 0.23
 0 1 -9 7.19 0.26
 0 1 -9 7.6 0.27
 -1 2 -8 29.38 0.67
 -1 2 -8 29.29 0.74
 -2 3 -7 31.94 0.79
 -3 4 -6 0.02 0.04
 -4 5 -5 2.32 0.13
 -5 6 -4 0.18 0.07
 -6 7 -3 0 0.06
 -4 2 13 0.08 0.09
 -3 1 12 4.86 0.23
 3 -1 -12 4.89 0.26
 3 -1 -12 5.48 0.26
 3 -1 -12 5.01 0.24
 -2 0 11 4.7 0.19
 2 0 -11 4.46 0.23
 2 0 -11 4.68 0.22
 2 0 -11 4.73 0.23
 -1 -1 10 19.07 0.46
 1 1 -10 18.37 0.54
 1 1 -10 18.72 0.55
 1 1 -10 19.14 0.53
 0 -2 9 76.66 1.54
 0 -2 9 72.26 1.54
 0 2 -9 71.92 1.65
 0 2 -9 73.26 1.74
 0 2 -9 73.28 1.68
 -1 3 -8 0 0.04
 -1 3 -8 0.01 0.02
 -2 4 -7 36.66 0.91
 -3 5 -6 1.46 0.11
 -4 6 -5 2.51 0.15
 -5 7 -4 0.04 0.06
 -4 1 13 0.9 0.15
 4 -1 -13 0.89 0.16
 -3 0 12 0.3 0.09
 3 0 -12 0.35 0.11
 3 0 -12 0.25 0.1
 3 0 -12 0.17 0.08
 -2 -1 11 0.03 0.04
 2 1 -11 0.07 0.05
 2 1 -11 0.09 0.06
 2 1 -11 0.1 0.07
 -1 -2 10 3.73 0.13
 1 2 -10 3.75 0.18
 1 2 -10 3.94 0.2
 1 2 -10 4.04 0.2
 0 -3 9 10.69 0.23
 0 -3 9 10.04 0.23
 0 3 -9 10.77 0.35
 0 3 -9 10.4 0.31
 -1 4 -8 0.08 0.03
 -1 4 -8 0.03 0.05
 -2 5 -7 3.57 0.18
 -3 6 -6 1.75 0.13
 -4 7 -5 0.23 0.09
 -4 0 13 2.01 0.16
 4 0 -13 1.94 0.16
 -3 -1 12 3.12 0.16
 3 1 -12 2.87 0.18
 3 1 -12 2.83 0.19
 3 1 -12 2.9 0.2
 -2 -2 11 0.93 0.08
 2 2 -11 0.94 0.12
 2 2 -11 1.31 0.16
 -1 -3 10 2.93 0.11
 1 3 -10 2.65 0.15
 1 3 -10 2.93 0.17
 0 4 -9 3.98 0.17
 0 4 -9 4.08 0.2
 -1 5 -8 3.61 0.14
 -1 5 -8 3.65 0.19
 -2 6 -7 0.71 0.12
 -3 7 -6 1.51 0.14
 -4 8 -5 2.42 0.18
 -4 -1 13 1.59 0.17
 4 1 -13 1.51 0.19
 -3 -2 12 0.93 0.12
 3 2 -12 0.89 0.14
 3 2 -12 0.99 0.17
 -2 -3 11 2.42 0.11
 2 3 -11 2.53 0.17
 2 3 -11 2.46 0.18
 -1 -4 10 8.04 0.21
 1 4 -10 8.11 0.29
 1 4 -10 7.62 0.32
 0 5 -9 0.3 0.09
 0 5 -9 0.28 0.07
 -1 6 -8 2.54 0.17
 -1 6 -8 2.47 0.12
 -2 7 -7 4.49 0.24
 -3 8 -6 1.48 0.15
 -3 -3 12 0.66 0.09
 3 3 -12 0.63 0.12
 3 3 -12 0.95 0.17
 -2 -4 11 3.67 0.1
 -2 -4 11 3.67 0.14
 2 4 -11 3.74 0.21
 2 4 -11 3.55 0.22
 1 5 -10 9.89 0.39
 1 5 -10 9.75 0.34
 0 6 -9 0.23 0.06
 0 6 -9 0.31 0.1
 -1 7 -8 0.65 0.14
 -1 7 -8 0.51 0.08
 -2 8 -7 0.04 0.08
 -3 -4 12 0.49 0.08
 3 4 -12 0.67 0.15
 3 4 -12 0.72 0.13
 -2 -5 11 0.2 0.05
 2 5 -11 0.15 0.07
 2 5 -11 0.22 0.11
 -1 -6 10 0.28 0.03
 1 6 -10 0.35 0.11
 1 6 -10 0.26 0.08
 0 7 -9 0.51 0.09
 0 7 -9 0.43 0.12
 -1 8 -8 8.09 0.37
 7 12 3 0.34 0.1
 -7 -12 -3 0.34 0.1
 -7 -12 -3 0.34 0.11
 8 11 2 0.89 0.13
 -8 -11 -2 1.1 0.16
 -8 -11 -2 1.11 0.17
 5 13 5 5.81 0.28
 6 12 4 1.32 0.17
 -6 -12 -4 1.21 0.15
 -6 -12 -4 1.23 0.16
 7 11 3 0.65 0.12
 -7 -11 -3 0.76 0.13
 8 10 2 1.14 0.1
 -8 -10 -2 1.33 0.16
 -8 -10 -2 1.14 0.15
 9 9 1 0.38 0.06
 -9 -9 -1 0.18 0.09
 -9 -9 -1 0.41 0.11
 4 13 6 2.11 0.18
 -4 -13 -6 1.98 0.12
 5 12 5 1.07 0.16
 -5 -12 -5 1.13 0.16
 -5 -12 -5 0.88 0.13
 6 11 4 7.97 0.3
 -6 -11 -4 7.92 0.3
 -6 -11 -4 7.76 0.31
 7 10 3 3.02 0.16
 -7 -10 -3 3.1 0.19
 -7 -10 -3 2.97 0.17
 8 9 2 0.16 0.05
 -8 -9 -2 0.13 0.07
 -8 -9 -2 0.16 0.08
 -9 -8 -1 0.56 0.11
 -9 -8 -1 0.72 0.13
 -10 -7 0 0.29 0.1
 -10 -7 0 0.67 0.13
 3 13 7 1.22 0.19
 -3 -13 -7 1.02 0.11
 4 12 6 0.12 0.08
 -4 -12 -6 0.11 0.07
 -4 -12 -6 0.06 0.07
 5 11 5 7.63 0.29
 -5 -11 -5 7.78 0.3
 -5 -11 -5 7.32 0.28
 6 10 4 1.22 0.13
 -6 -10 -4 1.28 0.15
 -6 -10 -4 1.14 0.13
 7 9 3 2.23 0.12
 -7 -9 -3 2.44 0.16
 -7 -9 -3 2.32 0.14
 8 8 2 0.08 0.03
 -8 -8 -2 0.1 0.06
 -8 -8 -2 0.19 0.07
 -9 -7 -1 0.07 0.06
 -9 -7 -1 0.12 0.07
 -10 -6 0 0.31 0.1
 -10 -6 0 0.06 0.07
 2 13 8 9.14 0.39
 -2 -13 -8 9.58 0.28
 -2 -13 -8 9.57 0.32
 3 12 7 2.51 0.18
 -3 -12 -7 2.3 0.12
 4 11 6 0.06 0.07
 -4 -11 -6 -0.08 0.05
 -4 -11 -6 -0.05 0.05
 5 10 5 0.21 0.08
 -5 -10 -5 0.25 0.08
 -5 -10 -5 0.29 0.08
 6 9 4 1.5 0.1
 -6 -9 -4 1.79 0.13
 -6 -9 -4 1.68 0.12
 7 8 3 0.9 0.06
 -7 -8 -3 1.11 0.1
 -7 -8 -3 0.96 0.09
 -8 -7 -2 3.51 0.18
 -8 -7 -2 3.26 0.17
 -9 -6 -1 1 0.14
 -9 -6 -1 0.94 0.12
 -10 -5 0 1.74 0.15
 -10 -5 0 1.86 0.14
 2 12 8 44.77 1.17
 -2 -12 -8 46.92 1.07
 -2 -12 -8 45.68 0.98
 3 11 7 16.34 0.51
 -3 -11 -7 16.39 0.48
 -3 -11 -7 16.25 0.4
 -3 -11 -7 15.97 0.47
 4 10 6 9 0.31
 -4 -10 -6 8.99 0.31
 -4 -10 -6 8.76 0.3
 5 9 5 5.06 0.2
 -5 -9 -5 4.98 0.2
 -5 -9 -5 5.09 0.21
 6 8 4 7.19 0.22
 -6 -8 -4 7.42 0.26
 -6 -8 -4 7.49 0.27
 -7 -7 -3 9.98 0.32
 -7 -7 -3 9.65 0.31
 -8 -6 -2 0.02 0.05
 -8 -6 -2 0.03 0.05
 -9 -5 -1 9.69 0.36
 -9 -5 -1 10.27 0.34
 -10 -4 0 13.03 0.42
 -10 -4 0 12.56 0.45
 1 12 9 0.2 0.12
 -1 -12 -9 0.13 0.08
 2 11 8 4.21 0.23
 -2 -11 -8 4.45 0.2
 -2 -11 -8 4.38 0.22
 -2 -11 -8 4.56 0.19
 -2 -11 -8 4.48 0.16
 3 10 7 4.67 0.22
 -3 -10 -7 5.05 0.17
 -3 -10 -7 5.06 0.21
 -3 -10 -7 5.05 0.2
 4 9 6 21.18 0.56
 -4 -9 -6 21.01 0.57
 -4 -9 -6 21.46 0.57
 5 8 5 0.02 0.04
 -5 -8 -5 0.07 0.05
 -5 -8 -5 0.06 0.05
 6 7 4 1.76 0.06
 6 7 4 1.56 0.06
 -6 -7 -4 1.83 0.11
 -6 -7 -4 1.6 0.11
 -7 -6 -3 0.15 0.05
 -7 -6 -3 0.1 0.05
 -8 -5 -2 0.99 0.11
 -8 -5 -2 0.99 0.12
 -9 -4 -1 0.44 0.09
 -9 -4 -1 0.52 0.1
 -10 -3 0 1.69 0.14
 0 12 10 0.82 0.19
 0 -12 -10 1.06 0.15
 1 11 9 8.28 0.35
 -1 -11 -9 8.55 0.29
 2 10 8 4.8 0.23
 -2 -10 -8 4.91 0.17
 -2 -10 -8 4.97 0.22
 -2 -10 -8 5.09 0.21
 3 9 7 2.36 0.14
 -3 -9 -7 2.15 0.1
 -3 -9 -7 2.12 0.12
 -3 -9 -7 2.33 0.13
 4 8 6 1.97 0.11
 -4 -8 -6 1.95 0.11
 -4 -8 -6 2.02 0.12
 -4 -8 -6 1.97 0.12
 5 7 5 1.07 0.06
 5 7 5 1.11 0.06
 -5 -7 -5 1.11 0.08
 -5 -7 -5 1.1 0.08
 -5 -7 -5 1.05 0.08
 -6 -6 -4 9.7 0.27
 -6 -6 -4 9.36 0.29
 -6 -6 -4 9.62 0.29
 -7 -5 -3 8.37 0.27
 -7 -5 -3 8.39 0.26
 -8 -4 -2 0.75 0.11
 -8 -4 -2 0.73 0.09
 -9 -3 -1 1.32 0.11
 -10 -2 0 1.11 0.14
 0 11 10 2.06 0.24
 0 -11 -10 2.08 0.15
 1 10 9 28.11 0.78
 -1 -10 -9 28.2 0.77
 -1 -10 -9 28.57 0.76
 -1 -10 -9 27.9 0.7
 2 9 8 6.44 0.26
 -2 -9 -8 6.58 0.26
 -2 -9 -8 6.46 0.25
 -2 -9 -8 6.66 0.24
 -2 -9 -8 6.68 0.19
 3 8 7 2.47 0.13
 -3 -8 -7 2.73 0.13
 -3 -8 -7 2.58 0.1
 -3 -8 -7 2.39 0.13
 -3 -8 -7 2.5 0.12
 4 7 6 0.54 0.06
 4 7 6 0.45 0.06
 -4 -7 -6 0.37 0.06
 -4 -7 -6 0.39 0.07
 -4 -7 -6 0.47 0.07
 -5 -6 -5 0.54 0.06
 -5 -6 -5 0.54 0.07
 -6 -5 -4 2.05 0.08
 -7 -4 -3 16.1 0.45
 -7 -4 -3 16.31 0.38
 -7 -4 -3 16.39 0.42
 -8 -3 -2 4.56 0.18
 -9 -2 -1 33.17 0.83
 -10 -1 0 1.11 0.15
 -1 11 11 0.09 0.11
 1 -11 -11 0.13 0.09
 0 10 10 5.47 0.28
 0 -10 -10 5.46 0.23
 1 9 9 12.49 0.42
 -1 -9 -9 12.07 0.35
 -1 -9 -9 12.59 0.41
 -1 -9 -9 11.96 0.39
 -1 -9 -9 12.36 0.39
 2 8 8 0.18 0.06
 -2 -8 -8 0.12 0.06
 -2 -8 -8 0.19 0.05
 -2 -8 -8 0.2 0.06
 -2 -8 -8 0.15 0.04
 3 7 7 14.93 0.4
 -3 -7 -7 15.4 0.35
 -3 -7 -7 15.41 0.41
 -3 -7 -7 14.64 0.41
 -3 -7 -7 15.56 0.41
 4 6 6 17.09 0.39
 4 6 6 18.65 0.4
 -4 -6 -6 17.84 0.46
 -4 -6 -6 18.03 0.45
 -4 -6 -6 17.82 0.45
 -5 -5 -5 6.16 0.17
 -5 -5 -5 6.55 0.17
 -6 -4 -4 3.77 0.14
 -6 -4 -4 3.74 0.13
 -7 -3 -3 1.4 0.08
 -8 -2 -2 21.12 0.54
 -9 -1 -1 14.67 0.44
 -10 0 0 0.85 0.13
 -1 10 11 0.97 0.18
 1 -10 -11 1.04 0.15
 0 9 10 0.78 0.15
 0 -9 -10 0.91 0.12
 0 -9 -10 0.5 0.1
 0 -9 -10 0.55 0.1
 0 -9 -10 0.77 0.14
 1 8 9 4.53 0.22
 -1 -8 -9 4.94 0.22
 -1 -8 -9 4.77 0.21
 -1 -8 -9 5.12 0.2
 -2 -7 -8 0.11 0.04
 -2 -7 -8 0.12 0.05
 -2 -7 -8 0.12 0.04
 -2 -7 -8 0.14 0.04
 3 6 7 15.24 0.38
 3 6 7 15.98 0.36
 -3 -6 -7 15.41 0.4
 -3 -6 -7 15.36 0.4
 -3 -6 -7 15.42 0.35
 -3 -6 -7 15.21 0.41
 -4 -5 -6 4.84 0.13
 -4 -5 -6 4.44 0.14
 -5 -4 -5 0.01 0.02
 -5 -4 -5 0.05 0.03
 -5 -4 -5 0.04 0.02
 -6 -3 -4 1.56 0.07
 -6 -3 -4 1.5 0.08
 -6 -3 -4 1.46 0.08
 -7 -2 -3 0.9 0.06
 -7 -2 -3 0.82 0.06
 -8 -1 -2 0.84 0.08
 -9 0 -1 1.4 0.15
 -10 1 0 0.54 0.12
 -1 9 11 3.79 0.24
 1 -9 -11 4.02 0.2
 1 -9 -11 4.6 0.23
 0 8 10 0.94 0.14
 0 -8 -10 1.33 0.14
 0 -8 -10 1.21 0.16
 0 -8 -10 1 0.13
 0 -8 -10 1.29 0.15
 1 7 9 5.66 0.23
 -1 -7 -9 5.66 0.21
 -1 -7 -9 5.43 0.23
 -1 -7 -9 5.79 0.22
 -2 -6 -8 0.27 0.06
 -2 -6 -8 0.47 0.08
 -2 -6 -8 0.25 0.05
 -2 -6 -8 0.3 0.04
 -3 -5 -7 0.57 0.06
 -3 -5 -7 0.47 0.04
 -3 -5 -7 0.5 0.06
 -3 -5 -7 0.46 0.05
 -4 -4 -6 0.14 0.04
 -4 -4 -6 0.18 0.03
 -5 -3 -5 0.2 0.03
 -5 -3 -5 0.35 0.04
 -5 -3 -5 0.25 0.04
 -6 -2 -4 0.01 0.02
 -6 -2 -4 -0.01 0.02
 -7 -1 -3 0.03 0.03
 -7 -1 -3 0.06 0.03
 -7 -1 -3 0.1 0.03
 -8 0 -2 1.93 0.12
 -9 1 -1 0.02 0.05
 -2 9 12 3.93 0.26
 2 -9 -12 4.26 0.22
 -1 8 11 0.48 0.12
 1 -8 -11 0.47 0.12
 1 -8 -11 0.59 0.11
 1 -8 -11 0.52 0.1
 1 -8 -11 0.51 0.12
 0 7 10 2.93 0.18
 0 -7 -10 3.03 0.16
 0 -7 -10 3.08 0.16
 0 -7 -10 2.89 0.18
 1 6 9 5.73 0.22
 -1 -6 -9 6.1 0.23
 -1 -6 -9 6.32 0.22
 -1 -6 -9 6.13 0.24
 2 5 8 9.52 0.23
 2 5 8 8.81 0.25
 -2 -5 -8 8.61 0.27
 -2 -5 -8 9 0.26
 -2 -5 -8 9.65 0.28
 -2 -5 -8 9.22 0.22
 -3 -4 -7 5.06 0.13
 -3 -4 -7 5.29 0.19
 -3 -4 -7 5.1 0.13
 -3 -4 -7 4.86 0.14
 -4 -3 -6 28.73 0.64
 -4 -3 -6 29.43 0.69
 -4 -3 -6 28.36 0.66
 -5 -2 -5 17.25 0.39
 -6 -1 -4 73.62 1.59
 -6 -1 -4 74.98 1.59
 -7 0 -3 9.51 0.26
 -7 0 -3 9.7 0.27
 -7 0 -3 9.42 0.27
 -7 0 -3 9.6 0.26
 -8 1 -2 55.83 1.29
 -9 2 -1 1.3 0.15
 -2 8 12 1.43 0.21
 2 -8 -12 1.3 0.16
 -1 7 11 7.75 0.32
 1 -7 -11 7.78 0.3
 1 -7 -11 7.93 0.31
 1 -7 -11 7.99 0.33
 1 -7 -11 8.09 0.29
 0 6 10 2.63 0.16
 0 -6 -10 2.6 0.16
 0 -6 -10 2.52 0.14
 0 -6 -10 2.69 0.15
 -1 -5 -9 25.34 0.64
 -1 -5 -9 24.98 0.65
 -1 -5 -9 25.21 0.66
 2 4 8 0.35 0.03
 -2 -4 -8 0.45 0.07
 -2 -4 -8 0.34 0.05
 -2 -4 -8 0.44 0.06
 -3 -3 -7 76.62 1.68
 -3 -3 -7 75.72 1.7
 -3 -3 -7 76.68 1.49
 -4 -2 -6 8.99 0.22
 -4 -2 -6 9.01 0.22
 -5 -1 -5 0.97 0.03
 -6 0 -4 12.36 0.29
 -6 0 -4 12.31 0.28
 -7 1 -3 0.18 0.04
 -7 1 -3 0.21 0.05
 -7 1 -3 0.2 0.04
 -8 2 -2 20.77 0.56
 -8 2 -2 20.95 0.57
 -9 3 -1 8.83 0.33
 -2 7 12 0.02 0.09
 2 -7 -12 0.09 0.06
 2 -7 -12 0.03 0.08
 -1 6 11 7.41 0.3
 1 -6 -11 7.27 0.28
 1 -6 -11 7.6 0.32
 1 -6 -11 7.75 0.3
 0 5 10 16.62 0.48
 0 -5 -10 16.82 0.49
 0 -5 -10 17.01 0.48
 0 -5 -10 17.16 0.51
 1 4 9 1.39 0.08
 -1 -4 -9 1.39 0.1
 -1 -4 -9 1.23 0.09
 -1 -4 -9 1.56 0.09
 -2 -3 -8 7.75 0.24
 -2 -3 -8 7.86 0.25
 -2 -3 -8 7.53 0.21
 -2 -3 -8 7.75 0.18
 -3 -2 -7 4.24 0.15
 -3 -2 -7 4.16 0.14
 -3 -2 -7 4.33 0.12
 -4 -1 -6 4.24 0.12
 -4 -1 -6 4.29 0.12
 -6 1 -4 1.36 0.05
 -6 1 -4 1.48 0.06
 -7 2 -3 3.98 0.15
 -7 2 -3 4.01 0.16
 -8 3 -2 8.86 0.31
 -8 3 -2 9.34 0.31
 -3 7 13 0.68 0.16
 3 -7 -13 0.75 0.14
 -2 6 12 1.41 0.19
 2 -6 -12 1.22 0.16
 2 -6 -12 1.25 0.19
 2 -6 -12 1.25 0.15
 2 -6 -12 1.04 0.13
 -1 5 11 1.08 0.15
 1 -5 -11 1 0.13
 1 -5 -11 0.69 0.11
 1 -5 -11 0.88 0.14
 0 4 10 0.09 0.05
 0 -4 -10 0.06 0.05
 0 -4 -10 0.07 0.06
 0 -4 -10 0.04 0.04
 1 3 9 0.94 0.06
 1 3 9 0.99 0.05
 -1 -3 -9 0.86 0.07
 -1 -3 -9 1.06 0.09
 -1 -3 -9 1 0.07
 -2 -2 -8 0.93 0.08
 -2 -2 -8 1.03 0.05
 -2 -2 -8 0.95 0.04
 -3 -1 -7 0.02 0.02
 -3 -1 -7 0.05 0.03
 -3 -1 -7 0.02 0.02
 -4 0 -6 0.12 0.02
 -4 0 -6 0.11 0.03
 -5 1 -5 2.86 0.08
 -6 2 -4 1 0.06
 -6 2 -4 0.99 0.05
 -6 2 -4 1.05 0.05
 -6 2 -4 1.02 0.06
 -7 3 -3 1.91 0.11
 -7 3 -3 2.03 0.12
 -8 4 -2 3.29 0.18
 -8 4 -2 3.53 0.18
 -3 6 13 0.28 0.12
 3 -6 -13 0.34 0.11
 -2 5 12 -0.04 0.06
 2 -5 -12 -0.01 0.06
 2 -5 -12 0.03 0.07
 2 -5 -12 0 0.05
 -1 4 11 4.03 0.19
 1 -4 -11 3.75 0.19
 1 -4 -11 3.93 0.22
 1 -4 -11 3.87 0.19
 0 3 10 22.05 0.54
 0 -3 -10 21.02 0.6
 0 -3 -10 21.74 0.57
 0 -3 -10 22 0.6
 1 2 9 5.96 0.14
 1 2 9 5.69 0.14
 -1 -2 -9 5.77 0.22
 -1 -2 -9 5.92 0.19
 -1 -2 -9 5.64 0.21
 -2 -1 -8 4.54 0.11
 -2 -1 -8 4.76 0.18
 -2 -1 -8 4.31 0.17
 -3 0 -7 0.27 0.04
 -3 0 -7 0.19 0.04
 -3 0 -7 0.19 0.04
 -3 0 -7 0.27 0.04
 -4 1 -6 3.8 0.12
 -4 1 -6 4.02 0.1
 -4 1 -6 4.18 0.11
 -5 2 -5 0.11 0.02
 -5 2 -5 0.14 0.02
 -5 2 -5 0.11 0.02
 -6 3 -4 1.26 0.08
 -7 4 -3 2.54 0.14
 -7 4 -3 2.58 0.14
 -8 5 -2 1.36 0.13
 -8 5 -2 1.42 0.13
 -3 5 13 0.42 0.13
 -2 4 12 5.23 0.25
 2 -4 -12 5.34 0.27
 2 -4 -12 5.36 0.24
 2 -4 -12 5.4 0.26
 -1 3 11 0 0.05
 1 -3 -11 -0.03 0.05
 1 -3 -11 0.03 0.04
 1 -3 -11 0.03 0.05
 0 2 10 5.23 0.17
 0 -2 -10 5.32 0.23
 0 -2 -10 4.83 0.2
 0 -2 -10 5.17 0.21
 -1 -1 -9 0.79 0.06
 -1 -1 -9 0.67 0.07
 -1 -1 -9 0.84 0.1
 -2 0 -8 4.37 0.11
 -2 0 -8 4.52 0.16
 -2 0 -8 4.5 0.18
 -3 1 -7 2.59 0.1
 -3 1 -7 2.57 0.1
 -3 1 -7 2.52 0.11
 -3 1 -7 2.48 0.1
 -4 2 -6 4.57 0.14
 -4 2 -6 4.56 0.13
 -4 2 -6 4.61 0.14
 -5 3 -5 0.6 0.05
 -6 4 -4 0.03 0.04
 -7 5 -3 0.91 0.12
 -7 5 -3 0.84 0.12
 -3 4 13 19.63 0.6
 3 -4 -13 18.98 0.59
 -2 3 12 17.52 0.52
 2 -3 -12 17.76 0.57
 2 -3 -12 17.92 0.56
 2 -3 -12 17.74 0.53
 -1 2 11 10.68 0.32
 1 -2 -11 9.69 0.34
 1 -2 -11 10.04 0.37
 1 -2 -11 10 0.35
 0 1 10 2.65 0.1
 0 -1 -10 2.65 0.14
 0 -1 -10 2.49 0.13
 0 -1 -10 2.59 0.15
 -1 0 -9 1.22 0.07
 -1 0 -9 1.16 0.09
 -1 0 -9 1.05 0.08
 -2 1 -8 3.13 0.13
 -3 2 -7 19.72 0.5
 -4 3 -6 1.21 0.08
 -5 4 -5 4.04 0.16
 -6 5 -4 1.07 0.12
 -7 6 -3 1.02 0.13
 -7 6 -3 0.96 0.14
 -3 3 13 1.66 0.2
 3 -3 -13 1.43 0.17
 -2 2 12 9.6 0.33
 2 -2 -12 9.54 0.35
 2 -2 -12 9.34 0.36
 2 -2 -12 9.94 0.38
 -1 1 11 0.17 0.05
 1 -1 -11 0.12 0.07
 1 -1 -11 0.13 0.07
 1 -1 -11 0.16 0.06
 0 0 10 24.23 0.55
 0 0 -10 25.07 0.67
 0 0 -10 24.77 0.63
 0 0 -10 25.61 0.67
 -2 2 -8 46.91 1.12
 -3 3 -7 9.26 0.28
 -4 4 -6 1.07 0.08
 -5 5 -5 1.16 0.13
 -6 6 -4 1.26 0.12
 -3 2 13 1.16 0.16
 3 -2 -13 1.25 0.16
 3 -2 -13 1.36 0.19
 3 -2 -13 1.05 0.18
 -2 1 12 1.07 0.13
 2 -1 -12 1.12 0.15
 2 -1 -12 0.9 0.13
 2 -1 -12 0.98 0.15
 -1 0 11 1.53 0.09
 1 0 -11 1.52 0.13
 1 0 -11 1.4 0.12
 1 0 -11 1.49 0.11
 0 -1 10 10.55 0.25
 0 1 -10 10.79 0.35
 0 1 -10 10.53 0.33
 0 1 -10 10.64 0.35
 -1 2 -9 48.58 1.11
 -1 2 -9 49.95 1.2
 -2 3 -8 51.74 1.24
 -3 4 -7 3.76 0.17
 -4 5 -6 12.29 0.39
 -5 6 -5 6.62 0.27
 -3 1 13 0.84 0.13
 3 -1 -13 0.9 0.16
 3 -1 -13 0.98 0.16
 3 -1 -13 1.02 0.15
 -2 0 12 0.02 0.05
 2 0 -12 0.12 0.07
 2 0 -12 0.02 0.05
 2 0 -12 0.01 0.07
 -1 -1 11 0.34 0.05
 1 1 -11 0.18 0.08
 1 1 -11 0.12 0.06
 1 1 -11 0.22 0.08
 0 2 -10 14.53 0.44
 0 2 -10 13.46 0.4
 -1 3 -9 12.6 0.34
 -1 3 -9 12.51 0.39
 -2 4 -8 3.97 0.18
 -3 5 -7 6.88 0.26
 -4 6 -6 1.31 0.15
 -5 7 -5 2.02 0.15
 -3 0 13 0.48 0.1
 3 0 -13 0.48 0.13
 3 0 -13 0.75 0.14
 3 0 -13 0.66 0.12
 -2 -1 12 -0.02 0.04
 2 1 -12 0 0.05
 2 1 -12 -0.05 0.06
 2 1 -12 0.02 0.06
 -1 -2 11 1.04 0.06
 1 2 -11 1.36 0.14
 1 2 -11 1.16 0.15
 0 3 -10 0.63 0.11
 0 3 -10 0.55 0.08
 -1 4 -9 1.5 0.12
 -1 4 -9 1.79 0.1
 -2 5 -8 14.53 0.36
 -2 5 -8 14.18 0.45
 -3 6 -7 1.26 0.12
 -4 7 -6 0.04 0.07
 -3 -1 13 0.11 0.07
 3 1 -13 0.15 0.09
 3 1 -13 0.09 0.09
 3 1 -13 0.18 0.08
 -2 -2 12 0.11 0.05
 2 2 -12 0.37 0.1
 2 2 -12 0.1 0.06
 -1 -3 11 1.34 0.07
 1 3 -11 1.38 0.13
 1 3 -11 1.32 0.11
 0 4 -10 11.52 0.36
 0 4 -10 11.63 0.41
 -1 5 -9 8.73 0.33
 -1 5 -9 8.61 0.27
 -2 6 -8 -0.01 0.05
 -2 6 -8 -0.02 0.03
 -3 7 -7 0.26 0.09
 -3 -2 13 3.32 0.16
 3 2 -13 3.01 0.21
 3 2 -13 3.54 0.23
 -2 -3 12 3.81 0.1
 -2 -3 12 3.58 0.14
 2 3 -12 3.83 0.23
 2 3 -12 3.7 0.21
 -1 -4 11 0.46 0.04
 1 4 -11 0.52 0.1
 1 4 -11 0.73 0.14
 0 5 -10 5.48 0.27
 0 5 -10 5.18 0.22
 -1 6 -9 0.16 0.08
 -1 6 -9 0.11 0.05
 -2 7 -8 0.7 0.08
 -2 7 -8 0.77 0.15
 -2 -4 12 0.64 0.07
 2 4 -12 0.76 0.16
 2 4 -12 0.49 0.11
 1 5 -11 0.7 0.12
 1 5 -11 0.92 0.16
 0 6 -10 0.03 0.07
 0 6 -10 -0.01 0.05
 -1 7 -9 0.95 0.16
 7 12 4 -0.02 0.06
 -7 -12 -4 0.09 0.08
 -7 -12 -4 0 0.07
 8 11 3 4.47 0.19
 -8 -11 -3 4.57 0.23
 -8 -11 -3 4.18 0.23
 9 10 2 1.85 0.09
 -9 -10 -2 1.7 0.15
 -9 -10 -2 1.92 0.2
 5 13 6 0.35 0.11
 6 12 5 4.71 0.23
 -6 -12 -5 4.56 0.23
 -6 -12 -5 4.76 0.24
 7 11 4 1.43 0.15
 -7 -11 -4 1.2 0.16
 -7 -11 -4 1.25 0.12
 8 10 3 0.87 0.1
 -8 -10 -3 0.84 0.13
 -8 -10 -3 0.83 0.13
 -9 -9 -2 0.21 0.09
 -9 -9 -2 0.2 0.09
 -10 -8 -1 0.02 0.07
 -10 -8 -1 0.01 0.07
 4 13 7 1.73 0.16
 5 12 6 1.17 0.16
 -5 -12 -6 1.12 0.15
 -5 -12 -6 0.94 0.13
 6 11 5 1.31 0.11
 -6 -11 -5 1.46 0.12
 -6 -11 -5 1.62 0.17
 7 10 4 -0.01 0.04
 -7 -10 -4 0 0.06
 -7 -10 -4 0 0.06
 8 9 3 0.46 0.05
 -8 -9 -3 0.29 0.09
 -8 -9 -3 0.45 0.1
 -9 -8 -2 0.1 0.07
 -9 -8 -2 0.16 0.08
 -10 -7 -1 0.55 0.11
 -10 -7 -1 0.37 0.1
 3 13 8 2.62 0.2
 -3 -13 -8 2.96 0.15
 4 12 7 -0.02 0.06
 -4 -12 -7 0.11 0.07
 -4 -12 -7 -0.03 0.06
 5 11 6 -0.02 0.06
 -5 -11 -6 -0.04 0.05
 -5 -11 -6 0.01 0.06
 6 10 5 0.06 0.05
 -6 -10 -5 -0.01 0.05
 -6 -10 -5 0.01 0.05
 7 9 4 0.09 0.04
 -7 -9 -4 -0.03 0.05
 -7 -9 -4 0.07 0.06
 -8 -8 -3 4.58 0.21
 -8 -8 -3 4.75 0.21
 -9 -7 -2 1.22 0.15
 -9 -7 -2 1.39 0.15
 -10 -6 -1 0.48 0.11
 -10 -6 -1 0.5 0.1
 2 13 9 9.4 0.4
 3 12 8 16.47 0.52
 -3 -12 -8 15.99 0.5
 -3 -12 -8 15.61 0.49
 4 11 7 0.06 0.07
 -4 -11 -7 0 0.05
 -4 -11 -7 0.05 0.06
 5 10 6 1.43 0.11
 -5 -10 -6 1.47 0.12
 -5 -10 -6 1.47 0.11
 6 9 5 0.08 0.04
 -6 -9 -5 0.07 0.05
 -6 -9 -5 -0.03 0.05
 -7 -8 -4 0.15 0.07
 -7 -8 -4 0.22 0.07
 -8 -7 -3 3.05 0.16
 -8 -7 -3 3.48 0.17
 -9 -6 -2 1.13 0.13
 -9 -6 -2 1.13 0.14
 -10 -5 -1 0.18 0.09
 -10 -5 -1 0.33 0.09
 2 12 9 6.29 0.3
 -2 -12 -9 6.28 0.21
 3 11 8 27.5 0.77
 -3 -11 -8 28.65 0.75
 -3 -11 -8 29.38 0.76
 4 10 7 0.81 0.12
 -4 -10 -7 0.79 0.1
 -4 -10 -7 0.64 0.1
 5 9 6 31.88 0.77
 -5 -9 -6 32.27 0.8
 -5 -9 -6 31.85 0.81
 6 8 5 21.59 0.5
 6 8 5 22.46 0.5
 -6 -8 -5 21.88 0.58
 -6 -8 -5 22.24 0.59
 -7 -7 -4 5.86 0.22
 -7 -7 -4 5.79 0.22
 -8 -6 -3 0.53 0.09
 -8 -6 -3 0.54 0.09
 -9 -5 -2 1.34 0.12
 -9 -5 -2 1.22 0.1
 -10 -4 -1 0.02 0.07
 -10 -4 -1 -0.04 0.05
 1 12 10 7.54 0.35
 2 11 9 1.93 0.21
 -2 -11 -9 1.32 0.12
 -2 -11 -9 1.59 0.14
 -2 -11 -9 1.4 0.09
 3 10 8 2.32 0.15
 -3 -10 -8 2.43 0.13
 -3 -10 -8 2.38 0.14
 4 9 7 55.9 1.29
 -4 -9 -7 57.16 1.34
 -4 -9 -7 55.87 1.31
 5 8 6 0.65 0.07
 -5 -8 -6 0.51 0.08
 -5 -8 -6 0.73 0.1
 -5 -8 -6 0.6 0.08
 -6 -7 -5 18.42 0.49
 -6 -7 -5 19.54 0.5
 -6 -7 -5 18.4 0.5
 -7 -6 -4 9 0.28
 -7 -6 -4 8.94 0.28
 -8 -5 -3 2.5 0.13
 -8 -5 -3 2.63 0.14
 -9 -4 -2 6.44 0.26
 -9 -4 -2 6.59 0.24
 -10 -3 -1 0.08 0.07
 1 11 10 5.95 0.3
 2 10 9 1.14 0.16
 -2 -10 -9 1.01 0.12
 -2 -10 -9 1.02 0.13
 3 9 8 1.51 0.12
 -3 -9 -8 1.63 0.1
 -3 -9 -8 1.75 0.12
 -3 -9 -8 1.69 0.12
 4 8 7 3.7 0.15
 -4 -8 -7 3.85 0.17
 -4 -8 -7 4.12 0.17
 -4 -8 -7 4.08 0.16
 -5 -7 -6 12.59 0.36
 -5 -7 -6 12.38 0.35
 -5 -7 -6 12.57 0.35
 -6 -6 -5 48.48 1.11
 -6 -6 -5 47.99 1.14
 -6 -6 -5 49.22 1.09
 -7 -5 -4 22.19 0.51
 -7 -5 -4 22.43 0.57
 -7 -5 -4 21.52 0.55
 -8 -4 -3 3.11 0.14
 -8 -4 -3 3.34 0.16
 -9 -3 -2 17.37 0.47
 -10 -2 -1 5.67 0.24
 0 11 11 3.45 0.24
 0 -11 -11 3.09 0.18
 1 10 10 22.16 0.65
 -1 -10 -10 20.81 0.64
 -1 -10 -10 22.42 0.63
 -1 -10 -10 21.76 0.62
 2 9 9 1.6 0.17
 -2 -9 -9 1.34 0.11
 -2 -9 -9 1.16 0.1
 -2 -9 -9 1.33 0.1
 3 8 8 4.75 0.19
 -3 -8 -8 4.67 0.2
 -3 -8 -8 5.13 0.2
 -3 -8 -8 4.8 0.18
 4 7 7 0.67 0.05
 4 7 7 0.62 0.04
 -4 -7 -7 0.81 0.07
 -4 -7 -7 0.8 0.09
 -4 -7 -7 0.79 0.09
 -5 -6 -6 5.24 0.18
 -5 -6 -6 5.09 0.17
 -6 -5 -5 0.88 0.07
 -6 -5 -5 0.89 0.04
 -6 -5 -5 0.93 0.06
 -7 -4 -4 3.31 0.13
 -7 -4 -4 3.54 0.14
 -8 -3 -3 0.04 0.04
 -9 -2 -2 20.26 0.54
 -10 -1 -1 8.7 0.31
 0 10 11 8.87 0.37
 0 -10 -11 9.02 0.35
 1 9 10 3.53 0.2
 -1 -9 -10 4 0.2
 -1 -9 -10 3.7 0.19
 -1 -9 -10 3.44 0.2
 2 8 9 1.24 0.14
 -2 -8 -9 1.08 0.1
 -2 -8 -9 1.04 0.08
 -2 -8 -9 0.97 0.09
 3 7 8 0.44 0.07
 -3 -7 -8 0.41 0.07
 -3 -7 -8 0.48 0.07
 -3 -7 -8 0.52 0.08
 -4 -6 -7 0.34 0.05
 -4 -6 -7 0.38 0.06
 -4 -6 -7 0.33 0.06
 -5 -5 -6 1.34 0.07
 -5 -5 -6 1.11 0.05
 -6 -4 -5 6.88 0.21
 -6 -4 -5 6.91 0.2
 -7 -3 -4 2.88 0.11
 -8 -2 -3 2.82 0.12
 -9 -1 -2 7.74 0.26
 -10 0 -1 0.03 0.06
 -1 10 12 -0.01 0.09
 1 -10 -12 0.07 0.09
 0 9 11 1.45 0.19
 0 -9 -11 1.52 0.19
 0 -9 -11 1.57 0.18
 0 -9 -11 1.52 0.16
 1 8 10 0.15 0.07
 -1 -8 -10 0.15 0.06
 -1 -8 -10 0.23 0.08
 -1 -8 -10 0.25 0.07
 2 7 9 0.05 0.04
 -2 -7 -9 0.06 0.05
 -2 -7 -9 0.11 0.05
 -2 -7 -9 0.04 0.04
 3 6 8 0.49 0.04
 -3 -6 -8 0.63 0.07
 -3 -6 -8 0.66 0.08
 -3 -6 -8 0.57 0.07
 -4 -5 -7 5.2 0.15
 -5 -4 -6 7.27 0.2
 -5 -4 -6 7.28 0.2
 -5 -4 -6 7.47 0.23
 -6 -3 -5 0.72 0.05
 -6 -3 -5 0.8 0.05
 -6 -3 -5 0.74 0.05
 -7 -2 -4 0.64 0.05
 -7 -2 -4 0.76 0.05
 -7 -2 -4 0.67 0.05
 -8 -1 -3 1.84 0.1
 -9 0 -2 0 0.05
 -10 1 -1 1.16 0.15
 -1 9 12 2.19 0.25
 0 8 11 6.62 0.29
 0 -8 -11 6.75 0.28
 0 -8 -11 6.72 0.3
 0 -8 -11 6.59 0.27
 1 7 10 1.18 0.14
 -1 -7 -10 1.01 0.09
 -1 -7 -10 1.2 0.13
 -1 -7 -10 0.88 0.12
 2 6 9 0.28 0.06
 -2 -6 -9 0.32 0.06
 -2 -6 -9 0.33 0.06
 -2 -6 -9 0.36 0.07
 -3 -5 -8 0.27 0.05
 -3 -5 -8 0.3 0.05
 -4 -4 -7 0.77 0.05
 -4 -4 -7 0.72 0.06
 -5 -3 -6 4.23 0.12
 -5 -3 -6 4.33 0.14
 -5 -3 -6 4.21 0.12
 -6 -2 -5 5.41 0.14
 -6 -2 -5 5.48 0.14
 -7 -1 -4 0.52 0.04
 -7 -1 -4 0.47 0.04
 -7 -1 -4 0.53 0.04
 -8 0 -3 0.47 0.07
 -9 1 -2 0.69 0.11
 -1 8 12 1.79 0.16
 1 -8 -12 1.71 0.14
 0 7 11 24.94 0.69
 0 -7 -11 25.07 0.71
 0 -7 -11 24.07 0.67
 0 -7 -11 25.88 0.7
 1 6 10 18.55 0.51
 -1 -6 -10 19.62 0.55
 -1 -6 -10 18.5 0.52
 -1 -6 -10 18.54 0.52
 2 5 9 2.13 0.09
 -2 -5 -9 1.99 0.1
 -2 -5 -9 2.01 0.11
 -2 -5 -9 2.03 0.12
 -3 -4 -8 6.85 0.19
 -4 -3 -7 8.4 0.22
 -4 -3 -7 8.3 0.22
 -5 -2 -6 0.6 0.03
 -7 0 -4 0.03 0.02
 -7 0 -4 0.03 0.02
 -7 0 -4 0.01 0.02
 -7 0 -4 0.02 0.02
 -8 1 -3 16.46 0.43
 -8 1 -3 16.25 0.45
 -9 2 -2 14.24 0.43
 -2 8 13 1.96 0.24
 -1 7 12 0.61 0.13
 1 -7 -12 0.32 0.08
 1 -7 -12 0.35 0.11
 1 -7 -12 0.48 0.11
 0 6 11 41.66 1.04
 0 -6 -11 42.9 1.05
 0 -6 -11 42.46 1.09
 0 -6 -11 43.36 1.09
 1 5 10 20.49 0.51
 -1 -5 -10 19.35 0.53
 -1 -5 -10 20.18 0.56
 -1 -5 -10 19.9 0.55
 -2 -4 -9 15.4 0.41
 -2 -4 -9 13.82 0.41
 -2 -4 -9 15.85 0.4
 -3 -3 -8 24.06 0.57
 -3 -3 -8 22.97 0.52
 -3 -3 -8 24.01 0.59
 -3 -3 -8 25.36 0.52
 -4 -2 -7 0.48 0.03
 -4 -2 -7 0.52 0.04
 -4 -2 -7 0.5 0.04
 -5 -1 -6 0.32 0.02
 -7 1 -4 0.02 0.02
 -7 1 -4 0.03 0.02
 -7 1 -4 0.07 0.03
 -8 2 -3 5.53 0.21
 -8 2 -3 5.41 0.21
 -9 3 -2 5.22 0.24
 -9 3 -2 5.61 0.24
 -2 7 13 4.29 0.25
 2 -7 -13 4.5 0.23
 -1 6 12 0.89 0.14
 1 -6 -12 0.7 0.12
 1 -6 -12 0.68 0.11
 1 -6 -12 0.78 0.14
 0 5 11 -0.01 0.05
 0 -5 -11 -0.02 0.06
 0 -5 -11 0.01 0.04
 0 -5 -11 0.09 0.06
 1 4 10 1.44 0.08
 -1 -4 -10 1.4 0.1
 -1 -4 -10 1.35 0.1
 -1 -4 -10 1.51 0.12
 -2 -3 -9 0.56 0.08
 -2 -3 -9 0.54 0.05
 -3 -2 -8 10.77 0.3
 -3 -2 -8 10.71 0.28
 -3 -2 -8 11.27 0.31
 -4 -1 -7 0.02 0.02
 -4 -1 -7 0.03 0.02
 -4 -1 -7 0.02 0.01
 -6 1 -5 2.72 0.08
 -6 1 -5 2.72 0.08
 -7 2 -4 2.82 0.11
 -7 2 -4 2.7 0.12
 -8 3 -3 6.24 0.23
 -8 3 -3 6.31 0.23
 -2 6 13 1.83 0.21
 2 -6 -13 1.37 0.13
 -1 5 12 1.36 0.16
 1 -5 -12 1.56 0.18
 1 -5 -12 1.06 0.14
 1 -5 -12 1.01 0.16
 0 4 11 3.08 0.15
 0 -4 -11 3.14 0.18
 0 -4 -11 3.19 0.16
 0 -4 -11 3.11 0.17
 1 3 10 0 0.02
 1 3 10 0.05 0.02
 -1 -3 -10 0.01 0.03
 -1 -3 -10 -0.01 0.03
 -1 -3 -10 0.02 0.04
 -2 -2 -9 7.3 0.2
 -3 -1 -8 1.4 0.07
 -3 -1 -8 1.42 0.08
 -3 -1 -8 1.27 0.08
 -4 0 -7 0.58 0.04
 -4 0 -7 0.55 0.03
 -4 0 -7 0.63 0.05
 -4 0 -7 0.6 0.03
 -5 1 -6 5.65 0.15
 -6 2 -5 0.28 0.04
 -6 2 -5 0.31 0.03
 -6 2 -5 0.25 0.04
 -7 3 -4 17.92 0.46
 -7 3 -4 17.93 0.48
 -8 4 -3 5.44 0.22
 -8 4 -3 5 0.22
 -2 5 13 0.27 0.1
 2 -5 -13 0.24 0.08
 2 -5 -13 0.16 0.08
 2 -5 -13 0.29 0.11
 -1 4 12 1.74 0.13
 1 -4 -12 1.76 0.13
 1 -4 -12 1.77 0.14
 1 -4 -12 1.72 0.15
 0 3 11 3.85 0.15
 0 -3 -11 3.86 0.2
 0 -3 -11 3.77 0.18
 0 -3 -11 3.92 0.19
 -1 -2 -10 23.55 0.62
 -1 -2 -10 22.69 0.59
 -1 -2 -10 23.73 0.62
 -2 -1 -9 52.48 1.36
 -2 -1 -9 63.9 1.27
 -3 0 -8 7.78 0.24
 -3 0 -8 8.03 0.25
 -3 0 -8 8.02 0.23
 -4 1 -7 7.01 0.2
 -4 1 -7 6.83 0.18
 -4 1 -7 6.87 0.19
 -5 2 -6 3.21 0.11
 -5 2 -6 3.3 0.1
 -5 2 -6 2.93 0.1
 -6 3 -5 9.74 0.28
 -7 4 -4 8.67 0.29
 -7 4 -4 8.18 0.27
 -3 5 14 0.22 0.12
 -2 4 13 0.87 0.14
 2 -4 -13 0.53 0.12
 2 -4 -13 0.67 0.14
 2 -4 -13 0.64 0.11
 -1 3 12 1.43 0.11
 1 -3 -12 1.37 0.12
 1 -3 -12 1.42 0.13
 1 -3 -12 1.73 0.19
 0 2 11 0.88 0.06
 0 -2 -11 1.18 0.15
 0 -2 -11 1.08 0.12
 0 -2 -11 0.94 0.12
 -1 -1 -10 12.04 0.37
 -1 -1 -10 12.13 0.36
 -1 -1 -10 11.38 0.33
 -2 0 -9 35.76 0.87
 -2 0 -9 36.9 0.8
 -2 0 -9 36.22 0.88
 -3 1 -8 10.36 0.29
 -3 1 -8 9.96 0.28
 -4 2 -7 0.77 0.06
 -5 3 -6 0.97 0.07
 -6 4 -5 2.06 0.12
 -7 5 -4 0.08 0.06
 -7 5 -4 0.09 0.06
 -3 4 14 0.18 0.1
 3 -4 -14 0.13 0.07
 -2 3 13 2.32 0.16
 2 -3 -13 2.48 0.19
 2 -3 -13 2.16 0.16
 2 -3 -13 2.17 0.17
 -1 2 12 0.01 0.04
 1 -2 -12 0.02 0.06
 1 -2 -12 0.18 0.07
 1 -2 -12 -0.02 0.05
 0 1 11 8.24 0.22
 0 -1 -11 8.77 0.32
 0 -1 -11 8.36 0.29
 0 -1 -11 7.86 0.3
 -1 0 -10 3.93 0.18
 -1 0 -10 3.92 0.15
 -1 0 -10 4.1 0.18
 -2 1 -9 10.61 0.26
 -2 1 -9 10.64 0.32
 -2 1 -9 11.51 0.33
 -3 2 -8 22.36 0.57
 -4 3 -7 2.92 0.13
 -5 4 -6 0.16 0.05
 -6 5 -5 0.25 0.07
 -3 3 14 0.04 0.08
 3 -3 -14 0.08 0.07
 -2 2 13 1.55 0.16
 2 -2 -13 1.46 0.19
 2 -2 -13 1.58 0.19
 2 -2 -13 1.47 0.17
 -1 1 12 2.68 0.12
 1 -1 -12 2.74 0.17
 1 -1 -12 3.14 0.18
 1 -1 -12 2.69 0.18
 0 0 11 7.73 0.19
 0 0 -11 8.31 0.3
 0 0 -11 7.57 0.29
 0 0 -11 7.76 0.27
 -1 1 -10 37.67 0.93
 -1 1 -10 37.81 0.95
 -1 1 -10 38.12 0.89
 -2 2 -9 12.26 0.36
 -2 2 -9 11.4 0.29
 -3 3 -8 34.54 0.85
 -4 4 -7 3.35 0.15
 -5 5 -6 11.94 0.38
 -6 6 -5 3.33 0.18
 -3 2 14 2.08 0.16
 3 -2 -14 2.09 0.17
 -2 1 13 0.01 0.05
 2 -1 -13 -0.03 0.05
 2 -1 -13 0.06 0.07
 2 -1 -13 0.07 0.08
 -1 0 12 0.65 0.06
 1 0 -12 0.86 0.12
 1 0 -12 0.72 0.13
 1 0 -12 0.9 0.13
 0 1 -11 10.31 0.34
 0 1 -11 10.71 0.37
 0 1 -11 10.76 0.37
 -1 2 -10 1.35 0.09
 -1 2 -10 1.24 0.11
 -2 3 -9 1.28 0.1
 -2 3 -9 1.34 0.07
 -3 4 -8 0.62 0.1
 -4 5 -7 0.23 0.07
 -5 6 -6 1.53 0.13
 -3 1 14 0.05 0.07
 3 -1 -14 -0.05 0.06
 3 -1 -14 -0.06 0.08
 3 -1 -14 -0.04 0.08
 -2 0 13 3.28 0.15
 2 0 -13 3.34 0.22
 2 0 -13 3.83 0.22
 2 0 -13 3.57 0.21
 -1 -1 12 1.68 0.08
 1 1 -12 1.92 0.15
 1 1 -12 1.77 0.15
 1 1 -12 1.9 0.14
 0 2 -11 0.01 0.05
 0 2 -11 0.03 0.04
 -1 3 -10 0.77 0.12
 -1 3 -10 0.55 0.07
 -2 4 -9 3.48 0.18
 -2 4 -9 3.65 0.13
 -3 5 -8 3.77 0.19
 -4 6 -7 0.32 0.09
 -2 -1 13 0.06 0.05
 2 1 -13 0.18 0.09
 2 1 -13 0.12 0.07
 2 1 -13 0.1 0.09
 -1 -2 12 0.05 0.03
 1 2 -12 0.02 0.05
 1 2 -12 0.01 0.07
 0 3 -11 0.07 0.07
 0 3 -11 0.01 0.05
 -1 4 -10 0.54 0.08
 -1 4 -10 0.63 0.12
 -2 5 -9 0.07 0.07
 -2 5 -9 -0.02 0.03
 -3 6 -8 0.51 0.11
 -2 -2 13 0.71 0.08
 2 2 -13 0.75 0.13
 2 2 -13 0.91 0.16
 -1 -3 12 0.41 0.04
 1 3 -12 0.32 0.1
 1 3 -12 0.28 0.08
 0 4 -11 5.74 0.24
 0 4 -11 6.17 0.28
 -1 5 -10 2.43 0.17
 -1 5 -10 2.35 0.13
 -2 6 -9 1.17 0.16
 -2 6 -9 0.85 0.09
 1 4 -12 0.17 0.09
 0 5 -11 0.46 0.12
 -1 6 -10 -0.11 0.06
 7 12 5 5.15 0.23
 -7 -12 -5 5.33 0.26
 -7 -12 -5 5.32 0.25
 8 11 4 4.09 0.16
 -8 -11 -4 4 0.21
 -8 -11 -4 4.13 0.23
 -9 -10 -3 0.02 0.07
 -9 -10 -3 0.02 0.07
 5 13 7 0.08 0.09
 -5 -13 -7 0.14 0.08
 -5 -13 -7 0.01 0.07
 6 12 6 1.7 0.13
 -6 -12 -6 1.66 0.15
 -6 -12 -6 1.63 0.13
 7 11 5 0.16 0.06
 -7 -11 -5 0.15 0.08
 -7 -11 -5 0.02 0.06
 8 10 4 0.83 0.05
 -8 -10 -4 1.16 0.15
 -8 -10 -4 1.08 0.15
 -9 -9 -3 1.68 0.14
 -9 -9 -3 1.73 0.14
 -10 -8 -2 0.33 0.1
 -10 -8 -2 0.45 0.1
 4 13 8 0.45 0.12
 5 12 7 2.55 0.17
 -5 -12 -7 2.44 0.15
 -5 -12 -7 2.49 0.17
 6 11 6 6.76 0.25
 -6 -11 -6 6.28 0.27
 -6 -11 -6 6.54 0.26
 7 10 5 1.21 0.08
 -7 -10 -5 1.35 0.15
 -7 -10 -5 1.08 0.11
 -8 -9 -4 0.37 0.09
 -8 -9 -4 0.3 0.09
 -9 -8 -3 1.51 0.16
 -9 -8 -3 1.2 0.14
 -10 -7 -2 -0.02 0.06
 -10 -7 -2 0.01 0.06
 3 13 9 2 0.18
 4 12 8 0 0.07
 -4 -12 -8 -0.04 0.06
 -4 -12 -8 0.12 0.07
 5 11 7 0.3 0.08
 -5 -11 -7 0.5 0.1
 -5 -11 -7 0.39 0.09
 6 10 6 4.37 0.17
 -6 -10 -6 4.33 0.2
 -6 -10 -6 4.42 0.2
 -7 -9 -5 1.25 0.14
 -7 -9 -5 1.16 0.1
 -8 -8 -4 5.91 0.24
 -8 -8 -4 6.3 0.25
 -9 -7 -3 6.67 0.26
 -9 -7 -3 6.52 0.25
 -10 -6 -2 6.25 0.25
 -10 -6 -2 5.39 0.26
 3 12 9 1.49 0.19
 -3 -12 -9 0.83 0.14
 -3 -12 -9 1.17 0.14
 4 11 8 2.7 0.17
 -4 -11 -8 2.92 0.16
 -4 -11 -8 3.07 0.17
 5 10 7 7.74 0.26
 -5 -10 -7 6.89 0.26
 -5 -10 -7 7.79 0.28
 6 9 6 0.07 0.03
 -6 -9 -6 0.01 0.05
 -6 -9 -6 0.05 0.05
 -7 -8 -5 2.32 0.13
 -7 -8 -5 2.37 0.14
 -8 -7 -4 1.79 0.11
 -8 -7 -4 1.56 0.12
 -9 -6 -3 1.16 0.11
 -9 -6 -3 1.3 0.11
 -10 -5 -2 22.64 0.65
 -10 -5 -2 21.98 0.6
 2 12 10 0.87 0.17
 3 11 9 1.39 0.17
 -3 -11 -9 1.56 0.17
 -3 -11 -9 1.14 0.11
 4 10 8 9.63 0.32
 -4 -10 -8 9.34 0.32
 -4 -10 -8 8.86 0.3
 5 9 7 0.35 0.06
 -5 -9 -7 0.49 0.09
 -5 -9 -7 0.58 0.09
 -6 -8 -6 37.14 0.91
 -6 -8 -6 37.29 0.89
 -6 -8 -6 36.05 0.89
 -7 -7 -5 21.29 0.56
 -7 -7 -5 20.72 0.55
 -8 -6 -4 0.03 0.04
 -8 -6 -4 -0.03 0.04
 -9 -5 -3 0.9 0.12
 -9 -5 -3 0.89 0.11
 -10 -4 -2 7.91 0.28
 -10 -4 -2 8.3 0.32
 1 12 11 0.1 0.11
 2 11 10 1.75 0.16
 -2 -11 -10 1.71 0.15
 -2 -11 -10 1.48 0.13
 3 10 9 1.25 0.15
 -3 -10 -9 1.01 0.13
 -3 -10 -9 1.1 0.12
 -3 -10 -9 0.85 0.12
 4 9 8 0.08 0.05
 -4 -9 -8 0.1 0.06
 -4 -9 -8 0.07 0.05
 -4 -9 -8 0.13 0.06
 5 8 7 0.38 0.04
 5 8 7 0.38 0.04
 -5 -8 -7 0.36 0.07
 -5 -8 -7 0.45 0.08
 -5 -8 -7 0.31 0.07
 -6 -7 -6 59.85 1.33
 -6 -7 -6 58.73 1.37
 -6 -7 -6 57.12 1.32
 -7 -6 -5 35.68 0.87
 -7 -6 -5 35.8 0.85
 -7 -6 -5 35.21 0.82
 -8 -5 -4 10.71 0.33
 -8 -5 -4 10.23 0.31
 -8 -5 -4 10.56 0.28
 -9 -4 -3 7.92 0.29
 -9 -4 -3 8.05 0.26
 -10 -3 -2 0.01 0.05
 1 11 11 5.21 0.28
 2 10 10 0.65 0.12
 -2 -10 -10 0.59 0.1
 -2 -10 -10 0.63 0.12
 -2 -10 -10 0.81 0.12
 3 9 9 4.89 0.21
 -3 -9 -9 5.01 0.22
 -3 -9 -9 5.29 0.2
 -3 -9 -9 5.43 0.22
 4 8 8 2.5 0.11
 -4 -8 -8 2.23 0.13
 -4 -8 -8 2.29 0.12
 -4 -8 -8 2.41 0.13
 -5 -7 -7 1.36 0.09
 -5 -7 -7 1.16 0.09
 -5 -7 -7 1.13 0.08
 -6 -6 -6 10.05 0.27
 -6 -6 -6 10.07 0.29
 -6 -6 -6 9.8 0.29
 -7 -5 -5 7.27 0.18
 -7 -5 -5 7.29 0.23
 -7 -5 -5 7.22 0.23
 -8 -4 -4 2.79 0.12
 -8 -4 -4 2.92 0.14
 -9 -3 -3 14.53 0.4
 -10 -2 -2 4.81 0.2
 0 11 12 2.32 0.2
 1 10 11 2.84 0.19
 -1 -10 -11 3.09 0.18
 -1 -10 -11 3.1 0.21
 -1 -10 -11 2.59 0.17
 2 9 10 0.06 0.06
 -2 -9 -10 0.17 0.08
 -2 -9 -10 0.11 0.06
 -2 -9 -10 0.05 0.05
 3 8 9 0.58 0.09
 -3 -8 -9 0.49 0.08
 -3 -8 -9 0.47 0.09
 -3 -8 -9 0.43 0.07
 -4 -7 -8 3.67 0.15
 -4 -7 -8 3.76 0.15
 -4 -7 -8 3.57 0.15
 -5 -6 -7 2.09 0.1
 -5 -6 -7 2.26 0.11
 -5 -6 -7 2.3 0.11
 -6 -5 -6 2.2 0.1
 -6 -5 -6 2.22 0.1
 -7 -4 -5 0.22 0.05
 -7 -4 -5 0.2 0.04
 -8 -3 -4 3.6 0.13
 -9 -2 -3 0.75 0.09
 -10 -1 -2 3.98 0.18
 0 10 12 3.08 0.21
 0 -10 -12 3.03 0.19
 1 9 11 2.31 0.17
 -1 -9 -11 2.69 0.16
 -1 -9 -11 2.42 0.16
 -1 -9 -11 2.8 0.19
 2 8 10 9.75 0.33
 -2 -8 -10 9.83 0.32
 -2 -8 -10 10.78 0.36
 -2 -8 -10 9.75 0.33
 3 7 9 1.98 0.1
 -3 -7 -9 2.1 0.12
 -3 -7 -9 1.93 0.12
 -3 -7 -9 2.13 0.11
 -4 -6 -8 6.22 0.2
 -4 -6 -8 6.05 0.2
 -4 -6 -8 6.03 0.2
 -5 -5 -7 3.4 0.1
 -5 -5 -7 3.46 0.13
 -5 -5 -7 3.58 0.13
 -6 -4 -6 3.55 0.12
 -6 -4 -6 3.47 0.12
 -7 -3 -5 0.53 0.05
 -7 -3 -5 0.57 0.05
 -8 -2 -4 1.92 0.09
 -9 -1 -3 0.05 0.04
 -10 0 -2 0.88 0.12
 0 9 12 0.15 0.1
 0 -9 -12 0.09 0.07
 0 -9 -12 0.18 0.1
 0 -9 -12 0.22 0.08
 1 8 11 2.56 0.16
 -1 -8 -11 3.02 0.18
 -1 -8 -11 2.48 0.16
 -1 -8 -11 2.57 0.16
 2 7 10 0.65 0.09
 -2 -7 -10 0.58 0.1
 -2 -7 -10 0.58 0.09
 -2 -7 -10 0.36 0.07
 -3 -6 -9 11.53 0.34
 -3 -6 -9 10.78 0.32
 -3 -6 -9 11.99 0.34
 -4 -5 -8 4.13 0.15
 -4 -5 -8 5.24 0.15
 -5 -4 -7 38.84 0.86
 -5 -4 -7 38.2 0.89
 -6 -3 -6 2.73 0.1
 -6 -3 -6 3.26 0.1
 -6 -3 -6 3.13 0.1
 -7 -2 -5 3.1 0.1
 -7 -2 -5 3.11 0.1
 -7 -2 -5 3.1 0.1
 -8 -1 -4 0.15 0.04
 -9 0 -3 1.04 0.09
 -1 9 13 1.01 0.18
 0 8 12 8.23 0.33
 0 -8 -12 7.99 0.31
 0 -8 -12 7.98 0.35
 0 -8 -12 7.91 0.32
 1 7 11 5.99 0.24
 -1 -7 -11 5.78 0.24
 -1 -7 -11 6.4 0.27
 -1 -7 -11 5.82 0.24
 2 6 10 0.83 0.09
 -2 -6 -10 0.71 0.11
 -2 -6 -10 0.75 0.09
 -2 -6 -10 0.71 0.09
 -3 -5 -9 0.02 0.03
 -3 -5 -9 0.06 0.03
 -3 -5 -9 0.07 0.04
 -4 -4 -8 20.75 0.52
 -4 -4 -8 22.84 0.53
 -5 -3 -7 19.27 0.45
 -5 -3 -7 19.55 0.48
 -5 -3 -7 18.5 0.44
 -6 -2 -6 3.24 0.09
 -7 -1 -5 2.35 0.07
 -7 -1 -5 2.39 0.08
 -8 0 -4 4.28 0.15
 -9 1 -3 4.64 0.19
 -1 8 13 3.41 0.22
 1 -8 -13 3.9 0.21
 0 7 12 32.11 0.85
 0 -7 -12 33.32 0.9
 0 -7 -12 32.55 0.89
 0 -7 -12 33.05 0.86
 1 6 11 36.38 0.89
 -1 -6 -11 37.63 0.95
 -1 -6 -11 38.3 0.95
 -1 -6 -11 36.12 0.92
 2 5 10 7.15 0.19
 2 5 10 7.66 0.18
 -2 -5 -10 6.91 0.24
 -2 -5 -10 7.29 0.25
 -2 -5 -10 7.26 0.27
 -3 -4 -9 52.98 1.22
 -3 -4 -9 53.68 1.19
 -4 -3 -8 7.44 0.2
 -4 -3 -8 7.45 0.22
 -5 -2 -7 1.37 0.06
 -5 -2 -7 1.39 0.05
 -7 0 -5 0.07 0.02
 -8 1 -4 0.02 0.04
 -8 1 -4 0.16 0.05
 -9 2 -3 1.12 0.12
 -1 7 13 0.39 0.11
 1 -7 -13 0.29 0.11
 1 -7 -13 0.33 0.1
 1 -7 -13 0.27 0.08
 0 6 12 11.83 0.38
 0 -6 -12 11.21 0.42
 0 -6 -12 12.33 0.4
 0 -6 -12 11.56 0.4
 1 5 11 17.75 0.46
 -1 -5 -11 17.92 0.53
 -1 -5 -11 17.76 0.51
 -1 -5 -11 17.59 0.5
 -2 -4 -10 1.06 0.08
 -2 -4 -10 1.19 0.1
 -2 -4 -10 0.95 0.08
 -3 -3 -9 2.48 0.08
 -3 -3 -9 2.26 0.1
 -4 -2 -8 1.41 0.08
 -4 -2 -8 1.25 0.06
 -4 -2 -8 1.18 0.07
 -5 -1 -7 7.19 0.18
 -5 -1 -7 7.01 0.18
 -7 1 -5 1.39 0.06
 -7 1 -5 1.31 0.05
 -7 1 -5 1.41 0.05
 -7 1 -5 1.47 0.06
 -8 2 -4 1.09 0.08
 -8 2 -4 1.01 0.08
 -2 7 14 0.84 0.17
 -1 6 13 0.08 0.07
 1 -6 -13 0.01 0.07
 1 -6 -13 0.02 0.07
 1 -6 -13 0.11 0.06
 0 5 12 4.12 0.19
 0 -5 -12 4.27 0.21
 0 -5 -12 4.26 0.22
 0 -5 -12 4.65 0.24
 1 4 11 2.62 0.1
 -1 -4 -11 2.4 0.14
 -1 -4 -11 2.49 0.16
 -1 -4 -11 2.38 0.14
 -2 -3 -10 0.68 0.06
 -2 -3 -10 0.94 0.1
 -2 -3 -10 0.89 0.11
 -3 -2 -9 0.11 0.05
 -3 -2 -9 0.09 0.04
 -4 -1 -8 0.05 0.03
 -4 -1 -8 0.05 0.03
 -4 -1 -8 0.12 0.03
 -5 0 -7 0.19 0.03
 -7 2 -5 2.09 0.09
 -7 2 -5 2.06 0.09
 -8 3 -4 14.43 0.41
 -8 3 -4 14.74 0.41
 -2 6 14 -0.02 0.08
 2 -6 -14 0.02 0.06
 -1 5 13 7.31 0.29
 1 -5 -13 7.65 0.31
 1 -5 -13 7.47 0.34
 1 -5 -13 7.72 0.32
 0 4 12 15.25 0.42
 0 -4 -12 15.58 0.47
 0 -4 -12 15.85 0.49
 0 -4 -12 15.03 0.5
 1 3 11 2.18 0.07
 1 3 11 2.32 0.07
 -1 -3 -11 2.3 0.14
 -1 -3 -11 2.21 0.13
 -1 -3 -11 2.2 0.15
 -2 -2 -10 62.03 1.44
 -2 -2 -10 64.39 1.48
 -2 -2 -10 62.22 1.4
 -3 -1 -9 15.96 0.43
 -3 -1 -9 16.62 0.43
 -4 0 -8 6.27 0.19
 -4 0 -8 6.27 0.19
 -4 0 -8 6.49 0.18
 -4 0 -8 6.23 0.2
 -5 1 -7 5.98 0.15
 -5 1 -7 6.18 0.16
 -5 1 -7 6.17 0.18
 -6 2 -6 2.47 0.09
 -6 2 -6 2.4 0.08
 -7 3 -5 9.25 0.27
 -7 3 -5 9.29 0.28
 -8 4 -4 0.11 0.06
 -8 4 -4 0.19 0.07
 -2 5 14 0.27 0.1
 2 -5 -14 0.34 0.12
 2 -5 -14 0.34 0.12
 2 -5 -14 0.25 0.09
 -1 4 13 0.04 0.06
 1 -4 -13 0.07 0.07
 1 -4 -13 0.07 0.06
 1 -4 -13 0.07 0.08
 0 3 12 0.44 0.07
 0 -3 -12 0.35 0.1
 0 -3 -12 0.38 0.09
 0 -3 -12 0.5 0.09
 -1 -2 -11 0 0.04
 -1 -2 -11 -0.03 0.04
 -1 -2 -11 -0.01 0.03
 -2 -1 -10 28 0.66
 -2 -1 -10 28.32 0.71
 -2 -1 -10 28.79 0.72
 -3 0 -9 11.31 0.31
 -3 0 -9 10.4 0.31
 -4 1 -8 16.3 0.41
 -5 2 -7 2.57 0.1
 -6 3 -6 7.84 0.24
 -7 4 -5 0.75 0.1
 -7 4 -5 0.61 0.09
 -2 4 14 2.31 0.16
 2 -4 -14 2.34 0.19
 2 -4 -14 2.22 0.18
 2 -4 -14 2.34 0.17
 -1 3 13 6.03 0.23
 1 -3 -13 6.18 0.28
 1 -3 -13 6.39 0.3
 1 -3 -13 6.29 0.27
 0 2 12 0.02 0.03
 0 -2 -12 0.04 0.06
 0 -2 -12 0.03 0.06
 0 -2 -12 0.04 0.05
 -1 -1 -11 0.18 0.06
 -1 -1 -11 0.18 0.07
 -1 -1 -11 0.13 0.05
 -2 0 -10 5.46 0.17
 -2 0 -10 5.52 0.21
 -2 0 -10 5.76 0.22
 -3 1 -9 0.86 0.07
 -3 1 -9 0.82 0.07
 -4 2 -8 12.05 0.33
 -5 3 -7 1.17 0.08
 -6 4 -6 0.87 0.1
 -7 5 -5 1.46 0.12
 -2 3 14 3.31 0.18
 2 -3 -14 3.43 0.21
 2 -3 -14 3.44 0.22
 2 -3 -14 3.5 0.24
 -1 2 13 2.92 0.14
 1 -2 -13 2.94 0.2
 1 -2 -13 3.07 0.18
 1 -2 -13 3.05 0.19
 0 1 12 2.31 0.08
 0 -1 -12 2.36 0.14
 0 -1 -12 2.36 0.16
 0 -1 -12 2.57 0.16
 -1 0 -11 7.74 0.28
 -1 0 -11 7.53 0.28
 -1 0 -11 7.61 0.25
 -2 1 -10 4.43 0.19
 -2 1 -10 4.29 0.14
 -2 1 -10 4.15 0.18
 -3 2 -9 8.01 0.26
 -4 3 -8 0.6 0.08
 -5 4 -7 4.14 0.18
 -6 5 -6 0.01 0.05
 -2 2 14 6.18 0.24
 2 -2 -14 6.04 0.31
 2 -2 -14 6.35 0.29
 2 -2 -14 6.76 0.31
 -1 1 13 0.61 0.08
 1 -1 -13 0.56 0.12
 1 -1 -13 0.51 0.1
 1 -1 -13 0.51 0.12
 0 0 -12 6.6 0.28
 0 0 -12 6.83 0.28
 0 0 -12 6.63 0.26
 -1 1 -11 0.01 0.03
 -1 1 -11 0.02 0.05
 -1 1 -11 0 0.05
 -2 2 -10 14.46 0.37
 -2 2 -10 14.39 0.43
 -3 3 -9 2.11 0.13
 -4 4 -8 2.71 0.15
 -5 5 -7 0.58 0.1
 -2 1 14 0.54 0.09
 2 -1 -14 0.27 0.09
 2 -1 -14 0.43 0.13
 2 -1 -14 0.56 0.14
 -1 0 13 0.85 0.06
 1 0 -13 1.07 0.14
 1 0 -13 1.43 0.18
 1 0 -13 0.99 0.15
 0 1 -12 3.47 0.19
 0 1 -12 3.29 0.19
 0 1 -12 3.26 0.17
 -1 2 -11 6.82 0.27
 -1 2 -11 6.64 0.24
 -2 3 -10 0.54 0.09
 -3 4 -9 4.18 0.2
 -4 5 -8 1.23 0.14
 -5 6 -7 0.78 0.13
 -2 0 14 0.27 0.06
 2 0 -14 0.36 0.1
 2 0 -14 0.23 0.1
 2 0 -14 0.16 0.11
 -1 -1 13 -0.01 0.03
 1 1 -13 0.03 0.05
 1 1 -13 -0.06 0.06
 1 1 -13 0.06 0.07
 0 2 -12 1.27 0.11
 0 2 -12 1.62 0.14
 -1 3 -11 0.41 0.08
 -1 3 -11 0.48 0.1
 -2 4 -10 10.2 0.36
 -2 4 -10 9.97 0.29
 -3 5 -9 1.39 0.13
 -4 6 -8 0.58 0.12
 -1 -2 13 0.05 0.02
 1 2 -13 0.06 0.06
 1 2 -13 0.05 0.07
 0 3 -12 0.77 0.14
 0 3 -12 0.73 0.12
 -1 4 -11 1.73 0.14
 -1 4 -11 1.47 0.11
 -2 5 -10 0 0.04
 -2 5 -10 0.03 0.07
 -3 6 -9 0.46 0.07
 -3 6 -9 0.47 0.11
 0 4 -12 0.09 0.08
 -1 5 -11 1.68 0.15
 7 12 6 32.1 0.8
 -7 -12 -6 32.38 0.87
 -7 -12 -6 32.56 0.87
 -8 -11 -5 2 0.2
 -8 -11 -5 1.37 0.13
 -9 -10 -4 -0.05 0.06
 -9 -10 -4 -0.03 0.06
 6 12 7 1.25 0.15
 -6 -12 -7 1.1 0.16
 -6 -12 -7 1.15 0.15
 7 11 6 5.71 0.19
 -7 -11 -6 5.62 0.25
 -7 -11 -6 5.86 0.25
 -8 -10 -5 3.09 0.18
 -8 -10 -5 2.93 0.17
 -9 -9 -4 1.41 0.12
 -9 -9 -4 1.46 0.13
 -10 -8 -3 0.02 0.06
 -10 -8 -3 -0.02 0.06
 5 12 8 1.4 0.13
 -5 -12 -8 1.54 0.14
 -5 -12 -8 1.45 0.12
 6 11 7 2.31 0.13
 -6 -11 -7 2.06 0.14
 -6 -11 -7 2.29 0.15
 -7 -10 -6 1.29 0.15
 -7 -10 -6 1.16 0.14
 -8 -9 -5 0.41 0.09
 -8 -9 -5 0.15 0.07
 -9 -8 -4 7.3 0.28
 -9 -8 -4 7.55 0.28
 -10 -7 -3 1.43 0.16
 -10 -7 -3 1.16 0.15
 4 12 9 -0.01 0.07
 -4 -12 -9 0.01 0.07
 -4 -12 -9 0.01 0.06
 5 11 8 0.6 0.11
 -5 -11 -8 0.51 0.1
 -5 -11 -8 0.49 0.1
 6 10 7 0.46 0.06
 -6 -10 -7 0.4 0.09
 -6 -10 -7 0.36 0.09
 -7 -9 -6 1.93 0.12
 -7 -9 -6 1.63 0.12
 -8 -8 -5 4.68 0.21
 -8 -8 -5 4.9 0.2
 -9 -7 -4 6.74 0.26
 -9 -7 -4 7.11 0.26
 -10 -6 -3 2.81 0.17
 -10 -6 -3 2.63 0.16
 3 12 10 2.46 0.18
 -3 -12 -10 2.39 0.17
 -3 -12 -10 2.61 0.16
 4 11 9 2.38 0.15
 -4 -11 -9 2.58 0.15
 -4 -11 -9 2.52 0.16
 5 10 8 0.13 0.05
 -5 -10 -8 0.22 0.07
 -5 -10 -8 0.38 0.08
 -6 -9 -7 6.53 0.25
 -6 -9 -7 6.43 0.24
 -7 -8 -6 5.92 0.23
 -7 -8 -6 5.77 0.22
 -8 -7 -5 0.85 0.11
 -8 -7 -5 0.83 0.08
 -9 -6 -4 0.05 0.05
 -9 -6 -4 -0.05 0.04
 -10 -5 -3 6.21 0.26
 -10 -5 -3 6.16 0.24
 2 12 11 1.85 0.17
 3 11 10 13.25 0.44
 -3 -11 -10 12.9 0.44
 -3 -11 -10 13.32 0.42
 4 10 9 0.08 0.06
 -4 -10 -9 0.09 0.07
 -4 -10 -9 0.12 0.06
 -4 -10 -9 0.18 0.07
 5 9 8 10.08 0.27
 -5 -9 -8 10.5 0.33
 -5 -9 -8 10.11 0.34
 -5 -9 -8 10.37 0.33
 -6 -8 -7 1.01 0.11
 -6 -8 -7 0.81 0.1
 -6 -8 -7 0.86 0.1
 -7 -7 -6 20.31 0.54
 -7 -7 -6 20.94 0.54
 -7 -7 -6 20.1 0.52
 -8 -6 -5 3.01 0.14
 -8 -6 -5 2.63 0.14
 -8 -6 -5 2.91 0.12
 -9 -5 -4 2.94 0.14
 -9 -5 -4 2.76 0.15
 -10 -4 -3 2.13 0.15
 -10 -4 -3 2.15 0.13
 2 11 11 0 0.08
 -2 -11 -11 0.08 0.07
 -2 -11 -11 0.01 0.07
 3 10 10 0.47 0.1
 -3 -10 -10 0.36 0.08
 -3 -10 -10 0.41 0.09
 -3 -10 -10 0.47 0.11
 4 9 9 2.45 0.12
 -4 -9 -9 2.52 0.14
 -4 -9 -9 2.6 0.13
 -4 -9 -9 2.41 0.14
 -5 -8 -8 0.85 0.08
 -5 -8 -8 0.88 0.1
 -5 -8 -8 0.87 0.08
 -6 -7 -7 0 0.03
 -6 -7 -7 0.06 0.05
 -6 -7 -7 0.05 0.04
 -7 -6 -6 1.16 0.08
 -7 -6 -6 1.21 0.07
 -7 -6 -6 1.19 0.09
 -8 -5 -5 1.25 0.09
 -8 -5 -5 1.21 0.09
 -8 -5 -5 1.29 0.06
 -9 -4 -4 2.58 0.12
 -9 -4 -4 2.9 0.15
 -10 -3 -3 0.11 0.07
 -10 -3 -3 0 0.05
 1 11 12 0.06 0.1
 -1 -11 -12 0.13 0.07
 2 10 11 0.02 0.07
 -2 -10 -11 -0.05 0.06
 -2 -10 -11 0 0.05
 -2 -10 -11 0 0.06
 3 9 10 2.76 0.15
 -3 -9 -10 2.69 0.16
 -3 -9 -10 2.85 0.15
 -3 -9 -10 2.63 0.16
 4 8 9 3.47 0.12
 -4 -8 -9 3.73 0.17
 -4 -8 -9 3.53 0.17
 -4 -8 -9 3.57 0.15
 -5 -7 -8 0.26 0.05
 -5 -7 -8 0.41 0.07
 -5 -7 -8 0.41 0.07
 -6 -6 -7 0.83 0.07
 -6 -6 -7 0.85 0.06
 -6 -6 -7 0.9 0.07
 -7 -5 -6 1.65 0.09
 -7 -5 -6 1.7 0.09
 -8 -4 -5 0.55 0.08
 -8 -4 -5 0.6 0.07
 -9 -3 -4 5.95 0.22
 -9 -3 -4 5.77 0.19
 -10 -2 -3 1.21 0.09
 1 10 12 0.96 0.16
 -1 -10 -12 0.5 0.1
 -1 -10 -12 0.68 0.13
 -1 -10 -12 0.82 0.15
 2 9 11 3.25 0.18
 -2 -9 -11 3.01 0.17
 -2 -9 -11 3.03 0.17
 -2 -9 -11 2.88 0.19
 3 8 10 1.65 0.1
 -3 -8 -10 1.5 0.11
 -3 -8 -10 1.56 0.12
 -3 -8 -10 1.49 0.1
 -4 -7 -9 3.23 0.15
 -4 -7 -9 3.38 0.14
 -4 -7 -9 3.38 0.15
 -5 -6 -8 1.88 0.09
 -5 -6 -8 1.79 0.09
 -5 -6 -8 1.82 0.1
 -6 -5 -7 7.3 0.22
 -6 -5 -7 7.48 0.22
 -7 -4 -6 0.67 0.06
 -7 -4 -6 0.77 0.06
 -8 -3 -5 6.56 0.19
 -8 -3 -5 6.57 0.21
 -9 -2 -4 0.74 0.08
 -10 -1 -3 0.06 0.05
 0 10 13 2.07 0.19
 0 -10 -13 2.12 0.17
 1 9 12 0.1 0.08
 -1 -9 -12 0.18 0.08
 -1 -9 -12 0.19 0.07
 -1 -9 -12 0.19 0.09
 2 8 11 1.42 0.11
 -2 -8 -11 1.58 0.17
 -2 -8 -11 1.13 0.11
 -2 -8 -11 1.07 0.1
 3 7 10 4.12 0.13
 -3 -7 -10 4.06 0.17
 -3 -7 -10 4.13 0.19
 -3 -7 -10 4.17 0.18
 -4 -6 -9 0.68 0.06
 -4 -6 -9 0.66 0.06
 -4 -6 -9 0.85 0.09
 -5 -5 -8 21.38 0.49
 -5 -5 -8 21.54 0.52
 -5 -5 -8 21.71 0.53
 -6 -4 -7 8 0.22
 -6 -4 -7 8.26 0.22
 -7 -3 -6 7.36 0.2
 -7 -3 -6 7.53 0.21
 -8 -2 -5 4.26 0.13
 -9 -1 -4 0.01 0.03
 -10 0 -3 1.02 0.09
 0 9 13 0.13 0.09
 0 -9 -13 0.03 0.08
 0 -9 -13 0.06 0.06
 0 -9 -13 0 0.08
 1 8 12 4.4 0.21
 -1 -8 -12 4.54 0.22
 -1 -8 -12 4.34 0.24
 -1 -8 -12 4.73 0.22
 2 7 11 38.12 0.89
 -2 -7 -11 38.07 0.97
 -2 -7 -11 38.7 0.96
 -2 -7 -11 37.44 0.94
 -3 -6 -10 2.01 0.12
 -3 -6 -10 2.14 0.11
 -3 -6 -10 1.98 0.13
 -4 -5 -9 48.16 1.12
 -4 -5 -9 47.89 1.08
 -4 -5 -9 48.8 1.11
 -5 -4 -8 14.5 0.37
 -5 -4 -8 14.73 0.37
 -6 -3 -7 4.37 0.13
 -6 -3 -7 4.43 0.14
 -6 -3 -7 4.49 0.13
 -7 -2 -6 2.52 0.08
 -7 -2 -6 2.67 0.08
 -8 -1 -5 0.21 0.04
 -8 -1 -5 0.23 0.03
 -9 0 -4 0.44 0.06
 0 8 13 -0.01 0.07
 0 -8 -13 -0.05 0.06
 0 -8 -13 -0.02 0.07
 0 -8 -13 -0.02 0.05
 1 7 12 0.68 0.11
 -1 -7 -12 0.65 0.12
 -1 -7 -12 0.49 0.1
 -1 -7 -12 0.5 0.12
 2 6 11 14.68 0.36
 -2 -6 -11 14.53 0.43
 -2 -6 -11 14.41 0.43
 -2 -6 -11 14.08 0.45
 -3 -5 -10 3.32 0.16
 -3 -5 -10 3.81 0.15
 -3 -5 -10 3.59 0.15
 -4 -4 -9 75.51 1.72
 -4 -4 -9 76.92 1.69
 -4 -4 -9 76.82 1.64
 -5 -3 -8 3.71 0.12
 -5 -3 -8 3.69 0.13
 -6 -2 -7 15.09 0.34
 -8 0 -5 0.3 0.04
 -8 0 -5 0.22 0.03
 -8 0 -5 0.38 0.05
 -9 1 -4 0.26 0.06
 -1 8 14 1.34 0.2
 1 -8 -14 1.07 0.15
 0 7 13 0.45 0.1
 0 -7 -13 0.29 0.11
 0 -7 -13 0.38 0.09
 0 -7 -13 0.33 0.11
 1 6 12 33.33 0.8
 -1 -6 -12 32.97 0.86
 -1 -6 -12 33.31 0.88
 -1 -6 -12 34.34 0.9
 -2 -5 -11 10.89 0.34
 -2 -5 -11 10.85 0.34
 -2 -5 -11 10.53 0.36
 -3 -4 -10 92.48 2.13
 -3 -4 -10 94.42 2.06
 -3 -4 -10 94.53 2.09
 -4 -3 -9 71.31 1.59
 -4 -3 -9 70.09 1.57
 -5 -2 -8 2.34 0.08
 -5 -2 -8 2.34 0.09
 -8 1 -5 6.49 0.2
 -8 1 -5 6.59 0.18
 -9 2 -4 9.46 0.29
 -9 2 -4 9.37 0.31
 -1 7 14 1.27 0.18
 1 -7 -14 1.17 0.15
 1 -7 -14 0.98 0.16
 1 -7 -14 1.3 0.2
 0 6 13 1.6 0.12
 0 -6 -13 1.62 0.14
 0 -6 -13 2.12 0.23
 0 -6 -13 1.55 0.13
 1 5 12 1.54 0.09
 -1 -5 -12 1.51 0.13
 -1 -5 -12 1.72 0.14
 -1 -5 -12 1.65 0.12
 -2 -4 -11 10.4 0.34
 -2 -4 -11 10.63 0.33
 -2 -4 -11 10.69 0.36
 -3 -3 -10 1.14 0.12
 -3 -3 -10 0.96 0.06
 -3 -3 -10 0.91 0.08
 -4 -2 -9 0.59 0.06
 -4 -2 -9 0.58 0.07
 -5 -1 -8 3.44 0.12
 -5 -1 -8 3.59 0.12
 -5 -1 -8 3.78 0.1
 -8 2 -5 3.46 0.14
 -8 2 -5 3.49 0.13
 -1 6 14 1.24 0.16
 1 -6 -14 1.2 0.2
 1 -6 -14 1.54 0.2
 1 -6 -14 1.13 0.15
 0 5 13 1.02 0.12
 0 -5 -13 1.08 0.17
 0 -5 -13 0.85 0.12
 0 -5 -13 1 0.15
 1 4 12 5.17 0.15
 -1 -4 -12 5.04 0.22
 -1 -4 -12 5.16 0.23
 -1 -4 -12 5.69 0.25
 -2 -3 -11 0.02 0.03
 -2 -3 -11 -0.03 0.04
 -2 -3 -11 0 0.05
 -3 -2 -10 2.9 0.15
 -3 -2 -10 2.95 0.13
 -3 -2 -10 3.1 0.1
 -4 -1 -9 1.84 0.1
 -4 -1 -9 2.03 0.09
 -5 0 -8 0.31 0.05
 -5 0 -8 0.42 0.04
 -5 0 -8 0.33 0.04
 -6 1 -7 6.37 0.16
 -7 2 -6 1.56 0.07
 -7 2 -6 1.54 0.08
 -8 3 -5 20.45 0.52
 -8 3 -5 21 0.55
 -1 5 14 2.84 0.17
 1 -5 -14 3.11 0.21
 1 -5 -14 2.8 0.21
 1 -5 -14 2.96 0.19
 0 4 13 1.87 0.11
 0 -4 -13 1.75 0.16
 0 -4 -13 1.76 0.14
 0 -4 -13 1.68 0.14
 -1 -3 -12 2.46 0.15
 -1 -3 -12 2.53 0.15
 -1 -3 -12 2.49 0.16
 -2 -2 -11 0.66 0.1
 -2 -2 -11 0.61 0.1
 -2 -2 -11 0.53 0.07
 -3 -1 -10 18.63 0.42
 -3 -1 -10 19.28 0.5
 -3 -1 -10 18.03 0.49
 -4 0 -9 2.5 0.11
 -4 0 -9 2.49 0.11
 -5 1 -8 1.86 0.08
 -6 2 -7 1.01 0.06
 -7 3 -6 0.31 0.06
 -7 3 -6 0.43 0.07
 -1 4 14 1.22 0.14
 1 -4 -14 1.53 0.2
 1 -4 -14 1.15 0.15
 1 -4 -14 1.12 0.18
 0 3 13 3.71 0.14
 0 -3 -13 3.74 0.21
 0 -3 -13 3.85 0.2
 0 -3 -13 3.89 0.22
 -1 -2 -12 2.92 0.18
 -1 -2 -12 2.89 0.15
 -1 -2 -12 2.79 0.16
 -2 -1 -11 6.82 0.25
 -2 -1 -11 6.45 0.21
 -2 -1 -11 6.36 0.25
 -3 0 -10 5.36 0.2
 -3 0 -10 5.42 0.2
 -3 0 -10 5.42 0.14
 -4 1 -9 0.25 0.05
 -5 2 -8 5.64 0.18
 -6 3 -7 1.63 0.09
 -7 4 -6 0.3 0.07
 -1 3 14 1.39 0.1
 1 -3 -14 1.5 0.14
 1 -3 -14 1.73 0.21
 1 -3 -14 1.8 0.2
 0 2 13 0.66 0.05
 0 -2 -13 0.86 0.13
 0 -2 -13 0.88 0.15
 0 -2 -13 0.92 0.12
 -1 -1 -12 1.27 0.12
 -1 -1 -12 1.4 0.11
 -1 -1 -12 1.49 0.12
 -2 0 -11 1.28 0.11
 -2 0 -11 1.04 0.09
 -2 0 -11 1.15 0.08
 -3 1 -10 0.09 0.05
 -3 1 -10 0.11 0.02
 -4 2 -9 4.09 0.16
 -5 3 -8 1.21 0.09
 -6 4 -7 0.54 0.09
 -1 2 14 0.91 0.08
 1 -2 -14 1.35 0.19
 1 -2 -14 1.26 0.16
 1 -2 -14 1.41 0.18
 0 -1 -13 0.64 0.1
 0 -1 -13 0.68 0.13
 0 -1 -13 0.69 0.13
 -1 0 -12 0.03 0.06
 -1 0 -12 0.12 0.06
 -1 0 -12 0.11 0.05
 -2 1 -11 1.87 0.1
 -2 1 -11 2.02 0.13
 -2 1 -11 1.97 0.13
 -3 2 -10 1.8 0.07
 -3 2 -10 1.75 0.11
 -4 3 -9 0.11 0.06
 -5 4 -8 0 0.04
 -6 5 -7 0.73 0.11
 -1 1 14 0.62 0.06
 1 -1 -14 0.83 0.15
 1 -1 -14 0.57 0.11
 1 -1 -14 1.1 0.18
 0 0 -13 4.29 0.22
 0 0 -13 4.04 0.22
 0 0 -13 3.82 0.2
 -1 1 -12 5.81 0.26
 -1 1 -12 6.42 0.24
 -1 1 -12 6.38 0.27
 -2 2 -11 1.2 0.08
 -2 2 -11 1.09 0.1
 -3 3 -10 9.78 0.33
 -3 3 -10 9.79 0.26
 -4 4 -9 2.87 0.16
 -5 5 -8 -0.01 0.06
 -1 0 14 0.15 0.04
 1 0 -14 0.06 0.08
 1 0 -14 0.32 0.11
 1 0 -14 0.16 0.08
 0 1 -13 7.56 0.32
 0 1 -13 7.63 0.3
 0 1 -13 7.75 0.32
 -1 2 -12 0.31 0.07
 -1 2 -12 0.43 0.1
 -2 3 -11 32.13 0.76
 -2 3 -11 30.73 0.84
 -3 4 -10 18.86 0.57
 -3 4 -10 19.78 0.48
 -4 5 -9 0.82 0.13
 0 2 -13 2.8 0.19
 -1 3 -12 2.51 0.17
 -1 3 -12 2.18 0.14
 -2 4 -11 0.54 0.08
 -2 4 -11 0.42 0.11
 -3 5 -10 3.96 0.15
 -3 5 -10 3.83 0.21
 7 12 7 4.19 0.17
 -7 -12 -7 4.64 0.23
 -7 -12 -7 4.44 0.23
 -8 -11 -6 -0.02 0.06
 -8 -11 -6 0.04 0.07
 -9 -10 -5 0.28 0.09
 -9 -10 -5 0.23 0.09
 6 12 8 0.76 0.11
 -6 -12 -8 0.6 0.13
 -6 -12 -8 0.66 0.12
 -7 -11 -7 2.01 0.15
 -7 -11 -7 1.91 0.14
 -8 -10 -6 0.11 0.07
 -8 -10 -6 0.08 0.07
 -9 -9 -5 0.77 0.12
 -9 -9 -5 0.56 0.1
 -10 -8 -4 0.09 0.07
 5 12 9 1 0.13
 -5 -12 -9 1.1 0.15
 -5 -12 -9 0.92 0.13
 6 11 8 0.19 0.05
 -6 -11 -8 0.21 0.09
 -6 -11 -8 0.25 0.08
 -7 -10 -7 1.14 0.14
 -7 -10 -7 1.26 0.11
 -8 -9 -6 1.77 0.13
 -8 -9 -6 1.64 0.12
 -9 -8 -5 -0.04 0.05
 -9 -8 -5 -0.05 0.05
 -10 -7 -4 3.02 0.17
 -10 -7 -4 3.05 0.17
 4 12 10 1.79 0.19
 -4 -12 -10 1.53 0.14
 -4 -12 -10 1.47 0.12
 5 11 9 0.01 0.05
 -5 -11 -9 0.04 0.06
 -5 -11 -9 0.02 0.06
 -6 -10 -8 0.81 0.11
 -6 -10 -8 0.77 0.11
 -7 -9 -7 0.02 0.05
 -7 -9 -7 0.26 0.07
 -8 -8 -6 0.6 0.1
 -8 -8 -6 0.72 0.1
 -9 -7 -5 0.04 0.05
 -9 -7 -5 -0.06 0.04
 -10 -6 -4 1.62 0.13
 -10 -6 -4 1.58 0.12
 3 12 11 5.07 0.25
 -3 -12 -11 5.21 0.24
 -3 -12 -11 5.1 0.27
 4 11 10 0.12 0.07
 -4 -11 -10 0.32 0.09
 -4 -11 -10 0.11 0.07
 5 10 9 3.41 0.13
 -5 -10 -9 3.29 0.18
 -5 -10 -9 3.47 0.18
 -5 -10 -9 3.33 0.16
 -6 -9 -8 0.59 0.09
 -6 -9 -8 0.73 0.1
 -6 -9 -8 0.61 0.1
 -7 -8 -7 1.14 0.1
 -7 -8 -7 1.17 0.09
 -7 -8 -7 1.17 0.09
 -8 -7 -6 0.18 0.06
 -8 -7 -6 0.17 0.05
 -8 -7 -6 0.13 0.05
 -9 -6 -5 0.28 0.07
 -9 -6 -5 0.24 0.07
 -10 -5 -4 1.19 0.12
 -10 -5 -4 1.11 0.14
 3 11 11 1.81 0.19
 -3 -11 -11 1.7 0.19
 -3 -11 -11 1.09 0.15
 -3 -11 -11 1.59 0.17
 4 10 10 17.82 0.48
 -4 -10 -10 17.85 0.54
 -4 -10 -10 18.22 0.53
 -4 -10 -10 17.97 0.51
 -5 -9 -9 2.11 0.13
 -5 -9 -9 1.99 0.13
 -5 -9 -9 1.98 0.12
 -6 -8 -8 8.02 0.27
 -6 -8 -8 8.5 0.27
 -6 -8 -8 7.87 0.27
 -7 -7 -7 1.62 0.09
 -7 -7 -7 1.59 0.1
 -7 -7 -7 1.68 0.1
 -8 -6 -6 0.11 0.05
 -8 -6 -6 0.16 0.04
 -8 -6 -6 0.13 0.05
 -9 -5 -5 0.2 0.06
 -9 -5 -5 0.09 0.05
 -10 -4 -4 1.71 0.11
 -10 -4 -4 1.81 0.13
 2 11 12 9.18 0.36
 -2 -11 -12 9.84 0.4
 -2 -11 -12 9.43 0.37
 -2 -11 -12 9.9 0.37
 3 10 11 2.07 0.14
 -3 -10 -11 1.75 0.14
 -3 -10 -11 1.84 0.13
 -3 -10 -11 1.73 0.14
 4 9 10 0.51 0.07
 -4 -9 -10 0.54 0.09
 -4 -9 -10 0.54 0.1
 -4 -9 -10 0.56 0.09
 -5 -8 -9 6.61 0.24
 -5 -8 -9 6.88 0.24
 -5 -8 -9 6.86 0.24
 -6 -7 -8 7.39 0.24
 -6 -7 -8 7.37 0.24
 -6 -7 -8 7.35 0.24
 -7 -6 -7 7.98 0.25
 -7 -6 -7 7.79 0.24
 -7 -6 -7 8 0.22
 -8 -5 -6 0.21 0.05
 -8 -5 -6 0.25 0.06
 -9 -4 -5 1.71 0.11
 -9 -4 -5 1.65 0.1
 -10 -3 -4 1.86 0.11
 -10 -3 -4 1.81 0.13
 2 10 12 2.05 0.15
 -2 -10 -12 2.08 0.17
 -2 -10 -12 1.85 0.15
 -2 -10 -12 1.94 0.15
 3 9 11 8.01 0.27
 -3 -9 -11 8.17 0.32
 -3 -9 -11 8.29 0.29
 -3 -9 -11 8.19 0.31
 -4 -8 -10 4.7 0.2
 -4 -8 -10 5.02 0.21
 -4 -8 -10 4.94 0.19
 -5 -7 -9 6.4 0.22
 -5 -7 -9 6.29 0.22
 -5 -7 -9 6.6 0.22
 -6 -6 -8 23.4 0.57
 -6 -6 -8 23.21 0.58
 -6 -6 -8 22.99 0.55
 -7 -5 -7 3.03 0.12
 -7 -5 -7 3.27 0.13
 -8 -4 -6 1.39 0.08
 -8 -4 -6 1.35 0.08
 -9 -3 -5 0.28 0.05
 -9 -3 -5 0.24 0.06
 -10 -2 -4 0.08 0.04
 1 10 13 0.74 0.15
 -1 -10 -13 0.97 0.16
 -1 -10 -13 0.81 0.16
 -1 -10 -13 0.67 0.13
 2 9 12 3.24 0.17
 -2 -9 -12 2.88 0.18
 -2 -9 -12 3.06 0.18
 -2 -9 -12 3.28 0.2
 3 8 11 2.71 0.12
 -3 -8 -11 2.82 0.15
 -3 -8 -11 3.22 0.18
 -3 -8 -11 2.95 0.16
 -4 -7 -10 5.25 0.19
 -4 -7 -10 5.37 0.21
 -4 -7 -10 5.51 0.21
 -5 -6 -9 27.34 0.66
 -5 -6 -9 27.03 0.65
 -5 -6 -9 26.86 0.67
 -6 -5 -8 0.04 0.03
 -6 -5 -8 0.09 0.04
 -7 -4 -7 13.72 0.34
 -7 -4 -7 13.94 0.35
 -8 -3 -6 0.08 0.03
 -8 -3 -6 0.07 0.04
 -9 -2 -5 2.34 0.09
 -10 -1 -4 0.72 0.08
 1 9 13 0.2 0.09
 -1 -9 -13 0.33 0.12
 -1 -9 -13 0.52 0.12
 -1 -9 -13 0.38 0.09
 2 8 12 1.22 0.1
 -2 -8 -12 1.34 0.12
 -2 -8 -12 1.71 0.19
 -2 -8 -12 1.26 0.12
 -3 -7 -11 1.29 0.15
 -3 -7 -11 0.9 0.09
 -3 -7 -11 1.01 0.12
 -4 -6 -10 5.29 0.21
 -4 -6 -10 5.06 0.19
 -4 -6 -10 5.56 0.19
 -5 -5 -9 24.17 0.56
 -5 -5 -9 24.28 0.59
 -5 -5 -9 24.55 0.59
 -6 -4 -8 0.21 0.04
 -6 -4 -8 0.25 0.04
 -7 -3 -7 17.48 0.4
 -7 -3 -7 17.69 0.42
 -8 -2 -6 0.44 0.04
 -8 -2 -6 0.49 0.04
 -9 -1 -5 0.22 0.04
 1 8 13 1.23 0.15
 -1 -8 -13 1.16 0.15
 -1 -8 -13 1.2 0.16
 -1 -8 -13 1.38 0.2
 2 7 12 0.72 0.07
 -2 -7 -12 0.79 0.11
 -2 -7 -12 0.84 0.13
 -2 -7 -12 0.83 0.12
 -3 -6 -11 0.97 0.12
 -3 -6 -11 0.98 0.11
 -3 -6 -11 0.89 0.1
 -4 -5 -10 0.08 0.05
 -4 -5 -10 0.04 0.04
 -4 -5 -10 0.06 0.03
 -5 -4 -9 0.38 0.05
 -5 -4 -9 0.37 0.06
 -6 -3 -8 0.42 0.05
 -6 -3 -8 0.4 0.04
 -7 -2 -7 0.05 0.02
 -9 0 -5 1.06 0.05
 0 8 14 0.85 0.14
 0 -8 -14 0.72 0.16
 0 -8 -14 0.68 0.12
 0 -8 -14 0.97 0.16
 1 7 13 2.73 0.15
 -1 -7 -13 2.75 0.17
 -1 -7 -13 2.77 0.2
 -1 -7 -13 2.67 0.18
 2 6 12 0.28 0.04
 -2 -6 -12 0.28 0.08
 -2 -6 -12 0.26 0.07
 -2 -6 -12 0.33 0.1
 -3 -5 -11 0.89 0.1
 -3 -5 -11 1.23 0.14
 -3 -5 -11 0.91 0.08
 -4 -4 -10 14.44 0.38
 -4 -4 -10 14.46 0.36
 -4 -4 -10 14.87 0.41
 -5 -3 -9 13.65 0.36
 -5 -3 -9 13.45 0.34
 -6 -2 -8 3.42 0.11
 -6 -2 -8 3.57 0.1
 -9 1 -5 9.6 0.29
 -9 1 -5 9.61 0.24
 0 7 14 4.5 0.22
 0 -7 -14 4.28 0.23
 0 -7 -14 4.76 0.25
 0 -7 -14 4.38 0.26
 1 6 13 15.01 0.4
 -1 -6 -13 15.17 0.49
 -1 -6 -13 14.78 0.47
 -1 -6 -13 15.08 0.51
 -2 -5 -12 0.32 0.08
 -2 -5 -12 0.16 0.06
 -2 -5 -12 0.37 0.09
 -3 -4 -11 2.4 0.14
 -3 -4 -11 2.38 0.13
 -3 -4 -11 2.28 0.12
 -4 -3 -10 39.48 0.92
 -4 -3 -10 38.37 0.92
 -5 -2 -9 2.97 0.1
 -5 -2 -9 2.81 0.12
 -6 -1 -8 8.75 0.21
 -8 1 -6 0.26 0.04
 0 6 14 2.76 0.16
 0 -6 -14 2.92 0.2
 0 -6 -14 2.91 0.19
 0 -6 -14 3.39 0.23
 1 5 13 10.87 0.29
 -1 -5 -13 11.22 0.39
 -1 -5 -13 11.29 0.41
 -1 -5 -13 10.84 0.38
 -2 -4 -12 2.94 0.16
 -2 -4 -12 2.8 0.17
 -2 -4 -12 2.8 0.15
 -3 -3 -11 0.28 0.07
 -3 -3 -11 0.15 0.04
 -3 -3 -11 0.13 0.05
 -4 -2 -10 0.19 0.05
 -4 -2 -10 0.21 0.06
 -5 -1 -9 8.81 0.25
 -5 -1 -9 8.86 0.24
 -6 0 -8 19.89 0.44
 -8 2 -6 9.25 0.27
 0 5 14 5.49 0.2
 0 -5 -14 5.02 0.25
 0 -5 -14 5.04 0.28
 0 -5 -14 5.29 0.26
 -1 -4 -13 9.42 0.36
 -1 -4 -13 8.89 0.33
 -1 -4 -13 8.68 0.34
 -2 -3 -12 0.48 0.08
 -2 -3 -12 0.63 0.11
 -2 -3 -12 0.68 0.11
 -3 -2 -11 12.05 0.32
 -3 -2 -11 12.19 0.36
 -3 -2 -11 11.74 0.37
 -4 -1 -10 2.25 0.11
 -4 -1 -10 2.41 0.12
 -5 0 -9 3.41 0.12
 -6 1 -8 3.14 0.1
 -6 1 -8 3.08 0.11
 -7 2 -7 1.19 0.07
 1 -5 -15 6.73 0.33
 1 -5 -15 7.05 0.35
 1 -5 -15 6.99 0.31
 0 4 14 10.07 0.28
 0 -4 -14 10.27 0.41
 0 -4 -14 10.08 0.39
 0 -4 -14 9.72 0.37
 -1 -3 -13 0.15 0.07
 -1 -3 -13 0.14 0.06
 -1 -3 -13 0.12 0.07
 -2 -2 -12 1.56 0.11
 -2 -2 -12 1.92 0.14
 -2 -2 -12 1.84 0.12
 -3 -1 -11 0.03 0.05
 -3 -1 -11 0.01 0.02
 -3 -1 -11 0.04 0.05
 -4 0 -10 0.78 0.07
 -4 0 -10 0.87 0.07
 -5 1 -9 0.98 0.07
 -6 2 -8 3.18 0.12
 -7 3 -7 0.77 0.07
 -1 4 15 5.2 0.21
 1 -4 -15 5.45 0.28
 1 -4 -15 5.11 0.28
 1 -4 -15 5.17 0.3
 0 3 14 0.17 0.04
 0 -3 -14 0.09 0.06
 0 -3 -14 0.07 0.08
 0 -3 -14 0.17 0.1
 -1 -2 -13 1.84 0.13
 -1 -2 -13 1.58 0.13
 -1 -2 -13 1.48 0.14
 -2 -1 -12 1.58 0.12
 -2 -1 -12 1.82 0.11
 -2 -1 -12 1.91 0.14
 -3 0 -11 1.42 0.1
 -3 0 -11 1.56 0.11
 -3 0 -11 1.4 0.07
 -4 1 -10 0.05 0.04
 -5 2 -9 2.36 0.11
 -6 3 -8 0.74 0.07
 1 -3 -15 0.2 0.1
 1 -3 -15 0.1 0.09
 0 -2 -14 0.06 0.06
 0 -2 -14 -0.04 0.06
 0 -2 -14 -0.12 0.06
 -1 -1 -13 1.99 0.14
 -1 -1 -13 1.91 0.14
 -1 -1 -13 2.32 0.16
 -2 0 -12 2.61 0.13
 -2 0 -12 2.57 0.16
 -2 0 -12 2.5 0.15
 -3 1 -11 1.18 0.07
 -3 1 -11 1.25 0.1
 -4 2 -10 0.12 0.05
 -5 3 -9 0.83 0.08
 -6 4 -8 0.05 0.05
 0 -1 -14 1.88 0.21
 0 -1 -14 1.35 0.13
 0 -1 -14 1.68 0.19
 -1 0 -13 3.19 0.19
 -1 0 -13 3.2 0.19
 -1 0 -13 3.4 0.18
 -2 1 -12 2.02 0.14
 -2 1 -12 2 0.12
 -2 1 -12 2 0.14
 -3 2 -11 14.78 0.45
 -3 2 -11 15.01 0.38
 -4 3 -10 3.2 0.16
 -5 4 -9 0.74 0.11
 0 0 -14 0.42 0.12
 0 0 -14 0.22 0.1
 -1 1 -13 3.47 0.2
 -1 1 -13 3.74 0.21
 -1 1 -13 3.59 0.19
 -2 2 -12 1.6 0.11
 -2 2 -12 1.6 0.13
 -3 3 -11 37.83 0.98
 -3 3 -11 38.19 0.88
 -4 4 -10 9.95 0.35
 -1 2 -13 5.21 0.25
 -2 3 -12 8.46 0.29
 -2 3 -12 8.42 0.33
 -3 4 -11 1.24 0.16
 -3 4 -11 0.96 0.08
 -8 -11 -7 2.92 0.18
 6 12 9 0.11 0.05
 -6 -12 -9 0.06 0.08
 -6 -12 -9 0.06 0.07
 -7 -11 -8 0.34 0.09
 -7 -11 -8 0.57 0.11
 -8 -10 -7 0.2 0.08
 -8 -10 -7 0.16 0.07
 -9 -9 -6 0.47 0.1
 -9 -9 -6 0.65 0.11
 5 12 10 0.05 0.06
 -5 -12 -10 0.08 0.09
 -5 -12 -10 -0.01 0.06
 -6 -11 -9 1.32 0.14
 -6 -11 -9 1.36 0.15
 -7 -10 -8 0.07 0.06
 -7 -10 -8 0.07 0.06
 -8 -9 -7 0.38 0.09
 -8 -9 -7 0.4 0.09
 -9 -8 -6 2.01 0.13
 -9 -8 -6 2.05 0.14
 -10 -7 -5 0.06 0.06
 -10 -7 -5 0.05 0.07
 5 11 10 11.36 0.32
 -5 -11 -10 11.23 0.37
 -5 -11 -10 11.5 0.39
 -6 -10 -9 0.33 0.09
 -6 -10 -9 0.46 0.09
 -6 -10 -9 0.32 0.08
 -7 -9 -8 1.14 0.13
 -7 -9 -8 1.12 0.13
 -7 -9 -8 1.36 0.14
 -8 -8 -7 1.35 0.1
 -8 -8 -7 1.47 0.11
 -8 -8 -7 1.58 0.11
 -9 -7 -6 0.03 0.05
 -9 -7 -6 0.03 0.05
 -10 -6 -5 1.27 0.11
 -10 -6 -5 1.16 0.1
 4 11 11 3.35 0.16
 -4 -11 -11 2.86 0.19
 -4 -11 -11 3.14 0.18
 -4 -11 -11 3.49 0.2
 -5 -10 -10 15.06 0.47
 -5 -10 -10 14.44 0.43
 -5 -10 -10 14.9 0.45
 -6 -9 -9 0.04 0.05
 -6 -9 -9 -0.03 0.05
 -6 -9 -9 0.07 0.05
 -7 -8 -8 5.42 0.21
 -7 -8 -8 5.31 0.21
 -7 -8 -8 5.37 0.21
 -8 -7 -7 0.22 0.06
 -8 -7 -7 0.15 0.06
 -8 -7 -7 0.15 0.05
 -9 -6 -6 1.51 0.1
 -9 -6 -6 1.44 0.08
 -9 -6 -6 1.4 0.1
 -10 -5 -5 0.04 0.05
 -10 -5 -5 0.05 0.05
 3 11 12 3.72 0.2
 -3 -11 -12 3.72 0.23
 -3 -11 -12 3.84 0.21
 -3 -11 -12 3.76 0.22
 4 10 11 3.39 0.14
 -4 -10 -11 3.37 0.19
 -4 -10 -11 3.27 0.17
 -4 -10 -11 3.55 0.2
 -5 -9 -10 7.2 0.28
 -5 -9 -10 7.7 0.27
 -5 -9 -10 7.15 0.25
 -6 -8 -9 0.11 0.05
 -6 -8 -9 0.07 0.06
 -6 -8 -9 0.11 0.05
 -7 -7 -8 15.32 0.4
 -7 -7 -8 14.66 0.41
 -7 -7 -8 15.06 0.42
 -8 -6 -7 8.52 0.27
 -8 -6 -7 8.67 0.26
 -8 -6 -7 8.47 0.23
 -9 -5 -6 0.06 0.04
 -9 -5 -6 0.02 0.04
 -10 -4 -5 1.99 0.11
 -10 -4 -5 1.9 0.12
 3 10 12 0.94 0.12
 -3 -10 -12 1.21 0.17
 -3 -10 -12 0.79 0.13
 -3 -10 -12 0.96 0.13
 -4 -9 -11 1.71 0.14
 -4 -9 -11 1.75 0.13
 -4 -9 -11 1.72 0.12
 -5 -8 -10 9.58 0.31
 -5 -8 -10 9.62 0.3
 -5 -8 -10 9.81 0.32
 -6 -7 -9 1.8 0.11
 -6 -7 -9 1.68 0.1
 -6 -7 -9 1.68 0.1
 -7 -6 -8 27.21 0.61
 -7 -6 -8 26.54 0.64
 -7 -6 -8 26.25 0.66
 -8 -5 -7 5.42 0.18
 -8 -5 -7 5.44 0.18
 -9 -4 -6 1.23 0.08
 -9 -4 -6 1.14 0.08
 -10 -3 -5 0.1 0.05
 -10 -3 -5 0.1 0.06
 2 10 13 1.14 0.15
 -2 -10 -13 1.34 0.19
 -2 -10 -13 0.87 0.14
 -2 -10 -13 1.48 0.18
 3 9 12 3.6 0.15
 -3 -9 -12 3.69 0.2
 -3 -9 -12 3.28 0.18
 -3 -9 -12 3.52 0.21
 -4 -8 -11 8.59 0.31
 -4 -8 -11 8.76 0.29
 -4 -8 -11 9.1 0.31
 -5 -7 -10 9.93 0.31
 -5 -7 -10 10.04 0.3
 -5 -7 -10 10.01 0.31
 -6 -6 -9 92.74 2.04
 -6 -6 -9 93.77 2.12
 -6 -6 -9 93.82 2.03
 -7 -5 -8 44.67 1.04
 -7 -5 -8 44.37 1
 -8 -4 -7 1.33 0.07
 -8 -4 -7 1.29 0.07
 -9 -3 -6 14.93 0.4
 -9 -3 -6 14.81 0.37
 -10 -2 -5 1 0.07
 2 9 13 1.51 0.12
 -2 -9 -13 1.6 0.2
 -2 -9 -13 1.53 0.14
 -2 -9 -13 1.6 0.14
 -3 -8 -12 0.4 0.09
 -3 -8 -12 0.16 0.08
 -3 -8 -12 0.11 0.06
 -4 -7 -11 0.8 0.1
 -4 -7 -11 0.86 0.12
 -4 -7 -11 1.06 0.11
 -5 -6 -10 27.8 0.69
 -5 -6 -10 28.3 0.67
 -5 -6 -10 27.13 0.68
 -6 -5 -9 29.96 0.7
 -6 -5 -9 29.69 0.72
 -7 -4 -8 4.4 0.14
 -7 -4 -8 4.46 0.14
 -8 -3 -7 6.7 0.19
 -8 -3 -7 6.7 0.18
 -9 -2 -6 1.59 0.06
 1 9 14 0 0.06
 -1 -9 -14 -0.04 0.08
 -1 -9 -14 -0.04 0.07
 -1 -9 -14 -0.03 0.05
 2 8 13 0.08 0.05
 -2 -8 -13 0.1 0.08
 -2 -8 -13 -0.05 0.06
 -2 -8 -13 0.08 0.06
 -3 -7 -12 0.91 0.13
 -3 -7 -12 1.11 0.13
 -3 -7 -12 1.17 0.13
 -4 -6 -11 1.96 0.13
 -4 -6 -11 1.97 0.12
 -4 -6 -11 2 0.11
 -5 -5 -10 0.15 0.05
 -5 -5 -10 0.22 0.04
 -5 -5 -10 0.08 0.06
 -6 -4 -9 0.49 0.05
 -6 -4 -9 0.7 0.07
 -7 -3 -8 7.25 0.19
 -7 -3 -8 7.3 0.19
 -8 -2 -7 1.76 0.07
 1 8 14 0.02 0.06
 -1 -8 -14 0.06 0.06
 -1 -8 -14 -0.03 0.07
 -1 -8 -14 0.04 0.09
 2 7 13 1.04 0.06
 -2 -7 -13 1.67 0.2
 -2 -7 -13 1.53 0.17
 -2 -7 -13 1.29 0.15
 -3 -6 -12 1.04 0.1
 -3 -6 -12 1.15 0.1
 -3 -6 -12 1.36 0.15
 -4 -5 -11 6.83 0.23
 -4 -5 -11 7.25 0.26
 -4 -5 -11 6.96 0.23
 -5 -4 -10 19.3 0.48
 -5 -4 -10 19.13 0.5
 -6 -3 -9 5.1 0.15
 -6 -3 -9 5.31 0.17
 -7 -2 -8 0.28 0.03
 1 7 14 11.43 0.34
 -1 -7 -14 11.55 0.42
 -1 -7 -14 11.85 0.45
 -1 -7 -14 10.96 0.4
 -2 -6 -13 2.26 0.15
 -2 -6 -13 1.96 0.14
 -2 -6 -13 2.2 0.17
 -3 -5 -12 0.16 0.06
 -3 -5 -12 0.03 0.04
 -3 -5 -12 0.02 0.05
 -4 -4 -11 8.08 0.26
 -4 -4 -11 8.22 0.28
 -4 -4 -11 8.16 0.24
 -5 -3 -10 13.75 0.38
 -5 -3 -10 14.08 0.36
 -6 -2 -9 0.01 0.02
 -6 -2 -9 -0.03 0.02
 1 6 14 32.05 0.74
 -1 -6 -14 32.99 0.91
 -1 -6 -14 32.41 0.9
 -1 -6 -14 31.75 0.86
 -2 -5 -13 9.41 0.33
 -2 -5 -13 9.61 0.36
 -2 -5 -13 8.71 0.33
 -3 -4 -12 3.63 0.19
 -3 -4 -12 3.72 0.17
 -3 -4 -12 3.88 0.18
 -4 -3 -11 1.78 0.08
 -4 -3 -11 1.72 0.1
 -4 -3 -11 1.63 0.11
 -5 -2 -10 0.2 0.04
 -5 -2 -10 0.2 0.05
 -6 -1 -9 0.89 0.05
 -6 -1 -9 0.86 0.05
 0 6 15 1.05 0.12
 0 -6 -15 1.13 0.18
 0 -6 -15 0.96 0.18
 -1 -5 -14 21.75 0.65
 -1 -5 -14 20.72 0.66
 -1 -5 -14 21.83 0.63
 -2 -4 -13 1.13 0.11
 -2 -4 -13 1.3 0.11
 -2 -4 -13 1.6 0.18
 -3 -3 -12 17.33 0.47
 -3 -3 -12 17 0.49
 -3 -3 -12 17.84 0.51
 -4 -2 -11 10.32 0.31
 -4 -2 -11 10.21 0.32
 -5 -1 -10 5.76 0.18
 -5 -1 -10 5.5 0.18
 -6 0 -9 5.51 0.16
 -7 1 -8 1.4 0.06
 0 5 15 0.42 0.07
 0 -5 -15 0.44 0.13
 0 -5 -15 0.3 0.12
 -1 -4 -14 0.05 0.08
 -1 -4 -14 0.21 0.09
 -1 -4 -14 0.27 0.08
 -2 -3 -13 2 0.13
 -2 -3 -13 2.27 0.16
 -2 -3 -13 1.95 0.14
 -3 -2 -12 0.71 0.11
 -3 -2 -12 0.68 0.08
 -3 -2 -12 0.7 0.11
 -4 -1 -11 0.8 0.1
 -4 -1 -11 0.64 0.09
 -5 0 -10 1.85 0.1
 -6 1 -9 2.77 0.11
 -7 2 -8 5.12 0.17
 0 4 15 4.79 0.15
 0 -4 -15 4.51 0.27
 0 -4 -15 5.31 0.27
 -1 -3 -14 0.1 0.07
 -1 -3 -14 0.08 0.08
 -1 -3 -14 -0.01 0.07
 -2 -2 -13 3.4 0.19
 -2 -2 -13 3.78 0.18
 -2 -2 -13 3.65 0.2
 -3 -1 -12 3.56 0.18
 -3 -1 -12 3.55 0.14
 -3 -1 -12 3.7 0.18
 -4 0 -11 0.48 0.08
 -4 0 -11 0.43 0.08
 -5 1 -10 1.38 0.09
 -6 2 -9 2.82 0.12
 0 -3 -15 1.72 0.16
 0 -3 -15 2.04 0.23
 -1 -2 -14 0.3 0.09
 -1 -2 -14 0.3 0.08
 -1 -2 -14 0.36 0.11
 -2 -1 -13 2.31 0.15
 -2 -1 -13 2.3 0.16
 -2 -1 -13 2.45 0.14
 -3 0 -12 0.8 0.07
 -3 0 -12 0.98 0.12
 -3 0 -12 1.03 0.12
 -4 1 -11 0.51 0.08
 -5 2 -10 2.12 0.12
 -6 3 -9 0.88 0.1
 -1 -1 -14 0.44 0.09
 -1 -1 -14 0.42 0.11
 -1 -1 -14 0.41 0.11
 -2 0 -13 0.1 0.06
 -2 0 -13 0.17 0.06
 -2 0 -13 0.05 0.06
 -3 1 -12 4.96 0.18
 -3 1 -12 4.81 0.22
 -4 2 -11 2.34 0.14
 -5 3 -10 0.06 0.06
 -1 0 -14 0.17 0.09
 -1 0 -14 0.31 0.1
 -2 1 -13 0.14 0.08
 -2 1 -13 0.22 0.07
 -3 2 -12 0.55 0.11
 -3 2 -12 0.37 0.06
 -4 3 -11 0.6 0.11
 -4 3 -11 0.58 0.06
 -7 -11 -9 0.7 0.11
 -7 -11 -9 0.79 0.12
 -8 -10 -8 0.41 0.09
 -8 -10 -8 0.47 0.1
 -9 -9 -7 0.03 0.06
 -9 -9 -7 0.12 0.07
 -6 -11 -10 0.62 0.11
 -6 -11 -10 0.53 0.11
 -7 -10 -9 1.27 0.11
 -7 -10 -9 1.45 0.15
 -7 -10 -9 1.07 0.11
 -8 -9 -8 0.48 0.09
 -8 -9 -8 0.35 0.08
 -8 -9 -8 0.47 0.09
 -9 -8 -7 0.68 0.1
 -9 -8 -7 0.53 0.09
 -5 -11 -11 1.38 0.17
 -5 -11 -11 1.4 0.15
 -6 -10 -10 0.3 0.08
 -6 -10 -10 0.33 0.09
 -6 -10 -10 0.31 0.09
 -7 -9 -9 17.04 0.49
 -7 -9 -9 17.93 0.51
 -7 -9 -9 17.26 0.49
 -8 -8 -8 12.83 0.37
 -8 -8 -8 12.11 0.37
 -8 -8 -8 12.4 0.38
 -9 -7 -7 1.04 0.11
 -9 -7 -7 0.89 0.11
 -9 -7 -7 0.84 0.08
 -10 -6 -6 0.01 0.05
 -10 -6 -6 -0.01 0.05
 4 11 12 0.48 0.08
 -4 -11 -12 0.39 0.1
 -4 -11 -12 0.57 0.13
 -5 -10 -11 0.13 0.07
 -5 -10 -11 0.19 0.08
 -5 -10 -11 0.15 0.08
 -6 -9 -10 1.28 0.11
 -6 -9 -10 1.37 0.1
 -6 -9 -10 1.31 0.11
 -7 -8 -9 24.55 0.65
 -7 -8 -9 25.14 0.64
 -7 -8 -9 24.43 0.63
 -8 -7 -8 12.07 0.34
 -8 -7 -8 11.77 0.35
 -8 -7 -8 12.3 0.35
 -9 -6 -7 0.58 0.08
 -9 -6 -7 0.64 0.09
 -10 -5 -6 4.15 0.18
 -10 -5 -6 4.22 0.17
 -4 -10 -12 4.2 0.22
 -4 -10 -12 3.75 0.22
 -4 -10 -12 4.2 0.2
 -5 -9 -11 4.42 0.21
 -5 -9 -11 4.51 0.19
 -5 -9 -11 4.64 0.21
 -6 -8 -10 2.05 0.13
 -6 -8 -10 1.89 0.11
 -6 -8 -10 1.89 0.12
 -7 -7 -9 8.87 0.28
 -7 -7 -9 9.21 0.28
 -7 -7 -9 9.28 0.28
 -8 -6 -8 7.04 0.22
 -8 -6 -8 7.08 0.23
 -9 -5 -7 2.25 0.11
 -9 -5 -7 2.32 0.11
 -10 -4 -6 0.04 0.04
 -10 -4 -6 0.11 0.06
 3 10 13 0.89 0.1
 -3 -10 -13 0.99 0.15
 -3 -10 -13 1.05 0.17
 -4 -9 -12 4.21 0.21
 -4 -9 -12 4.47 0.2
 -4 -9 -12 4.72 0.23
 -5 -8 -11 3.02 0.15
 -5 -8 -11 3.01 0.16
 -5 -8 -11 3.16 0.16
 -6 -7 -10 9.65 0.3
 -6 -7 -10 9.63 0.29
 -6 -7 -10 9.32 0.29
 -7 -6 -9 9.56 0.28
 -7 -6 -9 9.53 0.28
 -8 -5 -8 6.24 0.2
 -8 -5 -8 6.61 0.2
 -9 -4 -7 7.86 0.22
 -9 -4 -7 8.01 0.24
 3 9 13 0.52 0.04
 -3 -9 -13 0.61 0.12
 -3 -9 -13 0.46 0.1
 -3 -9 -13 0.62 0.12
 -4 -8 -12 2.6 0.15
 -4 -8 -12 2.71 0.16
 -4 -8 -12 2.64 0.17
 -5 -7 -11 3.93 0.17
 -5 -7 -11 3.95 0.16
 -5 -7 -11 3.74 0.18
 -6 -6 -10 2.15 0.11
 -6 -6 -10 2.24 0.1
 -6 -6 -10 2.06 0.12
 -7 -5 -9 1.11 0.08
 -7 -5 -9 1.07 0.07
 -8 -4 -8 0.29 0.05
 -8 -4 -8 0.36 0.05
 -9 -3 -7 2.86 0.09
 -9 -3 -7 2.98 0.12
 2 9 14 1.77 0.11
 -2 -9 -14 1.72 0.15
 -2 -9 -14 1.9 0.18
 -3 -8 -13 11.57 0.42
 -3 -8 -13 11.36 0.39
 -3 -8 -13 11.2 0.39
 -4 -7 -12 1.19 0.1
 -4 -7 -12 1.27 0.11
 -4 -7 -12 1.43 0.12
 -5 -6 -11 6.59 0.25
 -5 -6 -11 6.61 0.22
 -5 -6 -11 6.99 0.23
 -6 -5 -10 1.22 0.09
 -6 -5 -10 1.18 0.08
 -7 -4 -9 0.1 0.04
 -7 -4 -9 0.09 0.04
 -8 -3 -8 2.56 0.09
 -8 -3 -8 2.62 0.09
 -9 -2 -7 1.75 0.08
 2 8 14 -0.01 0.03
 -2 -8 -14 -0.01 0.07
 -2 -8 -14 0.08 0.08
 -2 -8 -14 0.05 0.06
 -3 -7 -13 1.43 0.17
 -3 -7 -13 1.24 0.15
 -3 -7 -13 1.32 0.15
 -4 -6 -12 0.51 0.08
 -4 -6 -12 0.65 0.09
 -4 -6 -12 0.71 0.11
 -5 -5 -11 0.18 0.05
 -5 -5 -11 0.05 0.04
 -5 -5 -11 0 0.05
 -6 -4 -10 4.12 0.14
 -6 -4 -10 3.99 0.16
 -7 -3 -9 0.52 0.04
 -7 -3 -9 0.59 0.06
 -8 -2 -8 5.48 0.15
 -2 -7 -14 0.19 0.08
 -2 -7 -14 0.36 0.11
 -2 -7 -14 0.29 0.1
 -3 -6 -13 1.84 0.13
 -3 -6 -13 1.73 0.15
 -3 -6 -13 1.86 0.13
 -4 -5 -12 0.21 0.07
 -4 -5 -12 0.22 0.06
 -4 -5 -12 0.2 0.06
 -5 -4 -11 1.41 0.11
 -5 -4 -11 1.47 0.09
 -6 -3 -10 0.31 0.05
 -6 -3 -10 0.29 0.06
 -7 -2 -9 1.35 0.05
 -2 -6 -14 6.46 0.28
 -2 -6 -14 6.38 0.3
 -2 -6 -14 6.88 0.29
 -3 -5 -13 1.48 0.12
 -3 -5 -13 1.45 0.13
 -3 -5 -13 1.48 0.12
 -4 -4 -12 1.17 0.08
 -4 -4 -12 0.89 0.09
 -4 -4 -12 1.14 0.11
 -5 -3 -11 0.68 0.09
 -5 -3 -11 0.63 0.08
 -6 -2 -10 0.13 0.04
 -6 -2 -10 0.16 0.04
 -7 -1 -9 0.49 0.03
 -1 -6 -15 0.5 0.14
 -1 -6 -15 0.85 0.15
 -2 -5 -14 12.63 0.42
 -2 -5 -14 11.99 0.44
 -2 -5 -14 12.92 0.44
 -3 -4 -13 1.41 0.16
 -3 -4 -13 1.22 0.14
 -3 -4 -13 1.09 0.1
 -4 -3 -12 6.14 0.25
 -4 -3 -12 6.54 0.21
 -4 -3 -12 6.48 0.24
 -5 -2 -11 1.24 0.08
 -5 -2 -11 1.22 0.09
 -6 -1 -10 1.95 0.09
 -6 -1 -10 1.91 0.09
 -7 0 -9 3.51 0.11
 -1 -5 -15 0.05 0.08
 -1 -5 -15 0.1 0.09
 -2 -4 -14 7.41 0.3
 -2 -4 -14 7.87 0.32
 -2 -4 -14 8.18 0.33
 -3 -3 -13 0.2 0.08
 -3 -3 -13 0.17 0.07
 -3 -3 -13 0.14 0.05
 -4 -2 -12 6.36 0.24
 -4 -2 -12 6.59 0.2
 -4 -2 -12 6.45 0.24
 -5 -1 -11 0.24 0.06
 -5 -1 -11 0.19 0.06
 -6 0 -10 0.12 0.04
 -7 1 -9 9.71 0.26
 -1 -4 -15 0.1 0.09
 -1 -4 -15 0.23 0.1
 -2 -3 -14 1.65 0.19
 -2 -3 -14 1.24 0.12
 -2 -3 -14 1.41 0.16
 -3 -2 -13 1.14 0.14
 -3 -2 -13 0.83 0.12
 -3 -2 -13 0.96 0.11
 -4 -1 -12 1.22 0.1
 -4 -1 -12 1.03 0.09
 -4 -1 -12 1 0.06
 -5 0 -11 0.9 0.1
 -6 1 -10 1.39 0.08
 -1 -3 -15 2.65 0.2
 -1 -3 -15 2.59 0.19
 -2 -2 -14 2.17 0.15
 -2 -2 -14 2.02 0.15
 -2 -2 -14 2.12 0.16
 -3 -1 -13 1.05 0.09
 -3 -1 -13 1.29 0.15
 -3 -1 -13 1.09 0.14
 -4 0 -12 0.48 0.09
 -4 0 -12 0.46 0.08
 -5 1 -11 2.14 0.12
 -6 2 -10 0.51 0.08
 -2 -1 -14 0.83 0.13
 -2 -1 -14 0.68 0.13
 -2 -1 -14 0.74 0.11
 -3 0 -13 0 0.06
 -3 0 -13 0.02 0.06
 -3 0 -13 0.04 0.04
 -4 1 -12 0.35 0.09
 -4 1 -12 0.33 0.05
 -5 2 -11 0.34 0.08
 -3 1 -13 0.15 0.06
 -3 1 -13 0.1 0.07
 -7 -10 -10 15.05 0.46
 -7 -10 -10 15.64 0.46
 -8 -9 -9 4.8 0.22
 -8 -9 -9 5.06 0.21
 -8 -9 -9 5.15 0.21
 -9 -8 -8 3.99 0.18
 -9 -8 -8 4.16 0.18
 -9 -8 -8 3.6 0.18
 -6 -10 -11 0.6 0.1
 -6 -10 -11 0.52 0.11
 -7 -9 -10 16.64 0.48
 -7 -9 -10 17.17 0.5
 -7 -9 -10 17.27 0.48
 -8 -8 -9 5.48 0.21
 -8 -8 -9 5.38 0.21
 -8 -8 -9 5.23 0.21
 -9 -7 -8 3.8 0.16
 -9 -7 -8 3.86 0.17
 -9 -7 -8 3.91 0.17
 -5 -10 -12 0.03 0.06
 -5 -10 -12 0.02 0.06
 -6 -9 -11 0.29 0.08
 -6 -9 -11 0.23 0.08
 -6 -9 -11 0.28 0.07
 -7 -8 -10 1.83 0.12
 -7 -8 -10 1.58 0.11
 -7 -8 -10 1.66 0.11
 -8 -7 -9 0.91 0.1
 -8 -7 -9 0.81 0.09
 -8 -7 -9 0.92 0.1
 -9 -6 -8 1.87 0.11
 -9 -6 -8 1.71 0.1
 -4 -10 -13 0.23 0.1
 -4 -10 -13 0.21 0.08
 -5 -9 -12 0.9 0.14
 -5 -9 -12 0.72 0.11
 -5 -9 -12 0.56 0.1
 -6 -8 -11 0.89 0.1
 -6 -8 -11 0.64 0.1
 -6 -8 -11 0.74 0.11
 -7 -7 -10 6.14 0.22
 -7 -7 -10 6.46 0.22
 -7 -7 -10 6.34 0.22
 -8 -6 -9 5.74 0.2
 -8 -6 -9 5.53 0.19
 -9 -5 -8 0.37 0.06
 -9 -5 -8 0.39 0.06
 -4 -9 -13 2.47 0.18
 -4 -9 -13 2.65 0.16
 -5 -8 -12 5.53 0.24
 -5 -8 -12 5.41 0.22
 -5 -8 -12 5.4 0.23
 -6 -7 -11 22.97 0.58
 -6 -7 -11 21.54 0.57
 -6 -7 -11 22.06 0.59
 -7 -6 -10 36.02 0.88
 -7 -6 -10 37.17 0.86
 -8 -5 -9 1.4 0.08
 -8 -5 -9 1.38 0.08
 -9 -4 -8 4.05 0.13
 -9 -4 -8 3.95 0.14
 -4 -8 -13 0.01 0.06
 -4 -8 -13 0.03 0.05
 -4 -8 -13 -0.01 0.05
 -5 -7 -12 13.51 0.4
 -5 -7 -12 13.47 0.42
 -5 -7 -12 12.62 0.39
 -6 -6 -11 12.52 0.36
 -6 -6 -11 13.3 0.36
 -6 -6 -11 12.98 0.38
 -7 -5 -10 2.18 0.11
 -7 -5 -10 2.01 0.1
 -8 -4 -9 8.98 0.24
 -8 -4 -9 9.06 0.25
 -9 -3 -8 1.4 0.07
 -3 -8 -14 0.3 0.1
 -3 -8 -14 0.14 0.09
 -4 -7 -13 0.4 0.09
 -4 -7 -13 0.26 0.07
 -4 -7 -13 0.49 0.11
 -5 -6 -12 1.74 0.11
 -5 -6 -12 1.53 0.13
 -5 -6 -12 1.57 0.11
 -6 -5 -11 2.07 0.11
 -6 -5 -11 2.36 0.13
 -7 -4 -10 0.6 0.05
 -7 -4 -10 0.93 0.09
 -8 -3 -9 0.28 0.04
 -8 -3 -9 0.31 0.04
 -9 -2 -8 0.61 0.04
 -3 -7 -14 0.81 0.14
 -3 -7 -14 1.01 0.15
 -3 -7 -14 0.81 0.12
 -4 -6 -13 0.3 0.08
 -4 -6 -13 0.33 0.08
 -4 -6 -13 0.32 0.1
 -5 -5 -12 0.81 0.07
 -5 -5 -12 0.86 0.08
 -5 -5 -12 1.36 0.15
 -6 -4 -11 0.04 0.05
 -6 -4 -11 0.02 0.04
 -7 -3 -10 0.64 0.06
 -7 -3 -10 0.65 0.05
 -8 -2 -9 0.49 0.03
 -3 -6 -14 0.01 0.07
 -3 -6 -14 0 0.05
 -3 -6 -14 0.05 0.07
 -4 -5 -13 0.05 0.06
 -4 -5 -13 0.1 0.06
 -4 -5 -13 0.07 0.05
 -5 -4 -12 1.56 0.1
 -5 -4 -12 1.61 0.12
 -5 -4 -12 1.62 0.09
 -6 -3 -11 0.61 0.07
 -6 -3 -11 0.69 0.09
 -7 -2 -10 0.14 0.03
 -7 -2 -10 0.21 0.04
 -2 -6 -15 5.07 0.26
 -2 -6 -15 5.2 0.28
 -3 -5 -14 0.06 0.08
 -3 -5 -14 0.09 0.06
 -3 -5 -14 0.09 0.07
 -4 -4 -13 1.12 0.09
 -4 -4 -13 1.01 0.1
 -4 -4 -13 1.21 0.15
 -5 -3 -12 -0.03 0.04
 -5 -3 -12 0.03 0.05
 -6 -2 -11 0.18 0.05
 -6 -2 -11 0.19 0.05
 -7 -1 -10 1.48 0.07
 -2 -5 -15 0.77 0.15
 -2 -5 -15 0.42 0.11
 -3 -4 -14 0.27 0.09
 -3 -4 -14 0.19 0.07
 -3 -4 -14 0.19 0.08
 -4 -3 -13 1.34 0.12
 -4 -3 -13 1.26 0.11
 -4 -3 -13 1.28 0.09
 -5 -2 -12 1.75 0.11
 -5 -2 -12 1.82 0.12
 -6 -1 -11 0.06 0.04
 -7 0 -10 0.96 0.06
 -2 -4 -15 2.06 0.18
 -2 -4 -15 2 0.16
 -3 -3 -14 0.21 0.09
 -3 -3 -14 0.11 0.07
 -3 -3 -14 0.11 0.06
 -4 -2 -13 0.11 0.07
 -4 -2 -13 0.05 0.04
 -4 -2 -13 0.13 0.07
 -5 -1 -12 0.08 0.05
 -5 -1 -12 0 0.05
 -6 0 -11 0.83 0.07
 -3 -2 -14 0.38 0.09
 -3 -2 -14 0.28 0.07
 -3 -2 -14 0.33 0.09
 -4 -1 -13 1.12 0.13
 -4 -1 -13 1.03 0.13
 -4 -1 -13 0.85 0.07
 -5 0 -12 2.46 0.13
 -3 -1 -14 0.07 0.07
 -3 -1 -14 0.07 0.05
 -3 -1 -14 0.08 0.07
 -4 0 -13 0.85 0.09
 -4 0 -13 0.88 0.12
 -7 -9 -11 3.31 0.17
 -7 -9 -11 3.08 0.16
 -8 -8 -10 9.16 0.29
 -8 -8 -10 8.63 0.29
 -8 -8 -10 8.99 0.3
 -6 -9 -12 2.54 0.16
 -6 -9 -12 2.19 0.13
 -7 -8 -11 0.28 0.07
 -7 -8 -11 0.24 0.08
 -7 -8 -11 0.26 0.07
 -8 -7 -10 0.84 0.08
 -8 -7 -10 0.77 0.07
 -8 -7 -10 1.13 0.11
 -5 -9 -13 2.13 0.14
 -5 -9 -13 2.07 0.16
 -6 -8 -12 0.97 0.11
 -6 -8 -12 1.05 0.14
 -6 -8 -12 1.04 0.12
 -7 -7 -11 2.75 0.14
 -7 -7 -11 2.5 0.14
 -7 -7 -11 2.52 0.13
 -8 -6 -10 1.77 0.1
 -8 -6 -10 1.88 0.11
 -5 -8 -13 4.88 0.21
 -5 -8 -13 4.86 0.23
 -5 -8 -13 4.19 0.23
 -6 -7 -12 9.2 0.3
 -6 -7 -12 9.33 0.31
 -6 -7 -12 9.66 0.33
 -7 -6 -11 4.68 0.19
 -7 -6 -11 4.72 0.17
 -8 -5 -10 20 0.49
 -8 -5 -10 19.27 0.5
 -4 -8 -14 0.65 0.13
 -5 -7 -13 1.82 0.13
 -5 -7 -13 1.57 0.12
 -5 -7 -13 1.73 0.14
 -6 -6 -12 1.98 0.14
 -6 -6 -12 1.97 0.11
 -6 -6 -12 2.18 0.12
 -7 -5 -11 19.94 0.51
 -7 -5 -11 20.79 0.53
 -8 -4 -10 9.35 0.26
 -8 -4 -10 9.42 0.26
 -4 -7 -14 0.42 0.11
 -4 -7 -14 0.43 0.1
 -5 -6 -13 0.03 0.06
 -5 -6 -13 0.02 0.06
 -5 -6 -13 0.02 0.04
 -6 -5 -12 1.82 0.11
 -6 -5 -12 1.83 0.13
 -7 -4 -11 0.2 0.06
 -7 -4 -11 0.25 0.05
 -8 -3 -10 1.7 0.07
 -4 -6 -14 0.96 0.13
 -4 -6 -14 0.81 0.12
 -4 -6 -14 0.86 0.14
 -5 -5 -13 0.01 0.04
 -5 -5 -13 0.05 0.06
 -5 -5 -13 0.04 0.07
 -6 -4 -12 0.06 0.05
 -6 -4 -12 -0.01 0.05
 -7 -3 -11 0.03 0.04
 -7 -3 -11 0.05 0.04
 -4 -5 -14 0.76 0.12
 -4 -5 -14 0.85 0.12
 -4 -5 -14 1 0.14
 -5 -4 -13 1.31 0.13
 -5 -4 -13 1.53 0.16
 -5 -4 -13 1.09 0.09
 -6 -3 -12 1.87 0.11
 -6 -3 -12 1.63 0.1
 -7 -2 -11 3.85 0.14
 -7 -2 -11 3.84 0.13
 -4 -4 -14 2.83 0.17
 -4 -4 -14 2.86 0.16
 -4 -4 -14 3.15 0.19
 -5 -3 -13 1.37 0.14
 -5 -3 -13 1.13 0.1
 -6 -2 -12 0.27 0.07
 -6 -2 -12 0.2 0.06
 -4 -3 -14 3.24 0.19
 -4 -3 -14 3.07 0.18
 -4 -3 -14 3 0.16
 -5 -2 -13 0.17 0.07
 -5 -2 -13 0.24 0.08
 -7 -6 -12 4.17 0.19
 -7 -6 -12 3.85 0.16
 -6 -6 -13 5.57 0.22
 -6 -6 -13 5.52 0.22
 -6 -6 -13 5.05 0.23
 -7 -5 -12 0.03 0.05
 -7 -5 -12 0.08 0.06
 -6 -5 -13 5.66 0.22
 -6 -5 -13 4.64 0.22
 -6 -5 -13 4.86 0.2

_iucr_refine_fcf_details
;
data_am_sn_l1
_computing_structure_refinement   'olex2.refine 1.3 (Bourhis et al., 2015)'
_shelx_refln_list_code            4
loop_
  _space_group_symop_id
  _space_group_symop_operation_xyz
  1  x,y,z
  2  -x,-y,-z

_space_group_crystal_system       triclinic
_space_group_IT_number            2
_space_group_name_H-M_alt         'P -1'
_space_group_name_Hall            '-P 1'
_symmetry_space_group_name_H-M    'P -1'
_symmetry_space_group_name_Hall   '-P 1'
_symmetry_Int_Tables_number       2
_cell_length_a                    8.7296(6)
_cell_length_b                    11.1447(6)
_cell_length_c                    12.3411(6)
_cell_angle_alpha                 70.914(2)
_cell_angle_beta                  86.955(2)
_cell_angle_gamma                 74.653(2)
_cell_volume                      1093.45(11)
loop_
  _refln_index_h
  _refln_index_k
  _refln_index_l
  _refln_F_squared_calc
  _refln_F_squared_meas
  _refln_F_squared_sigma
  _refln_F_squared_weight
  _refln_observed_status
-10 -7 1 5.048 3.364 0.948 72.673 o
-10 -6 1 6.670 11.350 1.350 38.313 o
-10 -6 2 27.598 27.240 3.118 9.582 o
-10 -5 1 15.274 15.261 2.834 14.987 o
-10 -5 2 0.339 -0.098 0.646 478.161 o
-10 -5 3 1.108 0.609 0.847 205.401 o
-10 -4 1 26.806 22.967 1.450 14.199 o
-10 -4 2 1.372 0.354 0.701 236.814 o
-10 -4 3 1.239 3.801 1.089 107.719 o
-10 -4 4 57.665 69.057 2.028 5.542 o
-10 -3 1 63.865 68.450 3.401 4.528 o
-10 -3 2 2.224 3.826 1.417 71.771 o
-10 -3 3 19.027 27.594 1.937 14.877 o
-10 -3 4 23.661 34.992 1.997 12.111 o
-10 -2 1 2.763 5.385 1.417 62.598 o
-10 -2 2 16.293 20.832 2.551 14.863 o
-10 -2 3 0.792 0.283 0.992 194.426 o
-10 -2 4 3.108 7.228 1.842 43.132 o
-10 -1 1 17.454 19.132 2.409 15.350 o
-10 -1 2 10.738 10.062 1.842 26.646 o
-10 -1 3 4.136 8.786 1.842 38.444 o
-10 -1 4 114.917 117.767 5.244 2.193 o
-10 0 1 5.816 4.960 1.417 49.006 o
-10 0 2 5.466 6.661 1.701 40.762 o
-10 0 3 0.923 -0.142 0.992 195.073 o
-10 0 4 65.446 73.835 4.110 4.000 o
-10 1 1 28.232 28.769 2.267 11.172 o
-10 1 2 0.695 -0.283 0.992 209.247 o
-10 1 3 8.683 8.078 1.984 28.823 o
-9 -9 1 13.572 16.870 1.368 23.844 o
-9 -8 1 0.092 -0.089 0.522 854.289 o
-9 -8 2 181.143 161.291 3.258 1.569 o
-9 -8 3 30.015 31.916 1.386 12.005 o
-9 -7 1 8.556 13.573 0.995 36.037 o
-9 -7 2 160.303 151.005 3.021 1.803 o
-9 -7 3 13.885 14.287 1.230 25.660 o
-9 -7 4 1.774 2.073 0.744 156.453 o
-9 -6 1 5.675 6.563 1.292 49.594 o
-9 -6 2 6.421 8.895 0.893 50.305 o
-9 -6 3 7.998 13.029 1.099 36.705 o
-9 -6 4 7.478 10.215 1.500 35.580 o
-9 -6 5 2.939 4.903 0.900 88.166 o
-9 -5 1 11.940 19.404 2.267 18.621 o
-9 -5 2 2.669 7.321 0.891 78.507 o
-9 -5 3 1.874 1.282 0.514 206.611 o
-9 -5 4 7.335 8.182 0.937 47.458 o
-9 -5 5 0.009 -0.186 0.561 831.035 o
-9 -5 6 8.143 12.050 1.905 27.900 o
-9 -4 1 6.830 7.645 1.630 37.640 o
-9 -4 2 58.350 56.561 2.976 5.347 o
-9 -4 3 8.170 11.117 0.862 41.273 o
-9 -4 4 1.543 3.852 0.896 119.870 o
-9 -4 5 1.487 1.321 0.644 206.279 o
-9 -4 6 17.964 24.921 1.399 17.747 o
-9 -3 1 23.850 21.825 1.842 14.452 o
-9 -3 2 67.436 58.813 3.118 4.733 o
-9 -3 3 16.924 21.683 2.693 13.915 o
-9 -3 4 3.119 2.025 0.558 133.182 o
-9 -3 5 0.001 -0.375 0.499 1062.220 o
-9 -3 6 0.098 0.028 0.583 686.208 o
-9 -3 7 1.056 1.210 0.751 214.347 o
-9 -2 1 2.204 3.118 1.134 94.142 o
-9 -2 2 69.972 72.276 3.401 4.205 o
-9 -2 3 98.282 87.156 3.968 2.996 o
-9 -2 4 23.766 25.396 1.063 15.730 o
-9 -2 5 0.000 0.272 0.577 683.066 o
-9 -2 6 4.695 6.703 1.073 59.620 o
-9 -2 7 16.586 23.932 1.710 17.595 o
-9 -1 1 0.008 0.567 0.850 314.699 o
-9 -1 2 14.573 17.573 2.267 17.687 o
-9 -1 3 0.042 0.000 0.850 357.463 o
-9 -1 4 105.033 106.572 4.677 2.523 o
-9 -1 5 20.662 23.861 3.189 10.979 o
-9 -1 6 1.835 4.265 0.837 114.598 o
-9 -1 7 20.261 24.145 4.677 7.413 o
-9 0 1 6.936 5.385 1.417 44.442 o
-9 0 2 1.738 1.134 0.992 138.124 o
-9 0 3 2.721 5.102 1.417 63.734 o
-9 0 4 17.943 26.076 3.118 11.541 o
-9 0 5 6.565 8.201 1.488 40.133 o
-9 0 6 0.605 5.093 0.837 133.896 o
-9 0 7 4.480 5.850 1.020 65.135 o
-9 1 1 8.949 9.212 1.701 31.177 o
-9 1 2 7.745 5.527 1.559 39.239 o
-9 1 3 0.570 1.701 1.134 142.350 o
-9 1 4 2.207 0.567 1.134 115.421 o
-9 1 5 45.765 43.224 3.118 6.562 o
-9 1 6 7.539 13.096 1.141 37.158 o
-9 1 7 10.535 16.836 1.477 26.247 o
-9 2 1 84.886 80.921 3.826 3.429 o
-9 2 2 10.936 15.022 2.267 20.629 o
-9 2 3 4.472 5.244 1.559 49.705 o
-9 2 4 228.874 207.474 7.369 0.968 o
-9 2 5 157.720 144.268 6.094 1.554 o
-9 2 6 0.705 2.267 1.417 96.155 o
-9 3 1 20.747 26.501 2.976 11.295 o
-9 3 2 11.698 16.014 2.409 18.857 o
-9 3 3 5.929 9.778 1.984 31.575 o
-9 3 4 2.740 0.283 0.992 123.070 o
-9 3 5 38.370 46.625 3.401 6.730 o
-9 4 1 7.560 11.054 1.984 28.346 o
-9 4 2 21.632 25.509 3.118 10.814 o
-9 4 3 16.300 28.060 3.401 10.808 o
-8 -10 1 132.456 127.124 2.890 2.266 o
-8 -10 2 8.863 9.495 1.984 27.690 o
-8 -9 1 17.693 16.984 1.498 19.887 o
-8 -9 2 2.403 4.206 0.818 105.924 o
-8 -9 3 8.418 11.337 2.126 25.589 o
-8 -8 1 8.158 9.500 0.975 42.191 o
-8 -8 2 33.444 37.518 1.412 10.546 o
-8 -8 3 12.376 13.224 1.447 26.436 o
-8 -8 4 0.912 3.826 1.417 83.945 o
-8 -8 5 1.661 2.126 1.417 85.054 o
-8 -7 1 2.503 6.350 0.761 91.624 o
-8 -7 2 6.613 9.356 0.925 48.146 o
-8 -7 3 15.263 17.033 1.280 22.733 o
-8 -7 4 9.042 7.098 1.239 39.363 o
-8 -7 5 7.847 4.960 1.559 39.684 o
-8 -7 6 3.091 2.551 1.417 69.988 o
-8 -6 1 6.431 3.502 0.600 71.454 o
-8 -6 2 2.832 1.456 0.514 155.099 o
-8 -6 3 1.687 3.319 0.679 145.750 o
-8 -6 4 10.300 16.445 1.309 28.062 o
-8 -6 5 34.703 23.377 1.222 12.132 o
-8 -6 6 18.867 25.084 2.976 11.889 o
-8 -6 7 16.503 13.321 2.267 17.789 o
-8 -5 1 157.917 146.099 2.668 1.875 o
-8 -5 2 551.592 488.149 7.137 0.308 o
-8 -5 3 64.088 49.775 1.522 5.986 o
-8 -5 4 28.282 27.051 1.222 13.462 o
-8 -5 5 0.106 -0.184 0.514 861.172 o
-8 -5 6 0.001 -0.455 0.541 902.221 o
-8 -5 7 31.095 28.627 2.409 10.312 o
-8 -4 1 99.055 99.139 5.314 2.519 o
-8 -4 2 9.262 14.268 0.828 35.338 o
-8 -4 3 20.844 27.314 1.394 15.808 o
-8 -4 4 0.461 0.440 0.477 526.863 o
-8 -4 5 0.305 0.312 0.491 620.552 o
-8 -4 6 12.150 18.270 1.440 24.090 o
-8 -4 7 257.752 259.059 7.936 0.792 o
-8 -4 8 185.866 175.871 6.236 1.280 o
-8 -3 1 285.773 293.922 8.220 0.686 o
-8 -3 2 102.916 103.937 3.488 2.847 o
-8 -3 3 83.026 76.035 2.070 4.118 o
-8 -3 4 45.230 49.123 1.561 7.723 o
-8 -3 5 7.990 8.845 0.977 43.612 o
-8 -3 6 6.890 8.061 1.034 47.637 o
-8 -3 7 52.302 56.707 2.467 6.077 o
-8 -3 8 77.584 75.819 3.685 3.763 o
-8 -2 1 150.825 148.236 4.960 1.718 o
-8 -2 2 76.840 83.188 3.543 3.727 o
-8 -2 3 62.157 56.961 2.551 5.368 o
-8 -2 4 31.030 30.823 1.360 11.923 o
-8 -2 5 10.939 15.114 1.127 29.485 o
-8 -2 6 10.153 10.825 1.291 32.605 o
-8 -2 7 3.209 4.082 0.807 95.030 o
-8 -2 8 6.683 8.928 1.842 33.177 o
-8 -2 9 4.735 3.968 1.559 51.192 o
-8 -1 1 4.306 3.968 1.134 68.790 o
-8 -1 2 19.299 19.699 2.267 15.101 o
-8 -1 3 1.721 1.275 0.992 136.552 o
-8 -1 4 30.347 32.798 1.701 11.318 o
-8 -1 5 26.872 27.598 1.771 12.738 o
-8 -1 6 4.082 6.364 1.049 65.131 o
-8 -1 7 47.034 51.913 2.111 6.978 o
-8 -1 8 175.072 177.327 4.456 1.474 o
-8 -1 9 18.904 23.667 2.834 12.523 o
-8 0 1 0.906 0.992 0.850 205.307 o
-8 0 2 12.174 13.747 1.984 22.274 o
-8 0 3 14.758 17.573 2.267 17.592 o
-8 0 4 11.129 12.522 2.055 23.104 o
-8 0 5 69.123 66.014 2.016 4.976 o
-8 0 6 0.756 1.502 0.707 238.621 o
-8 0 7 20.429 20.344 2.267 14.560 o
-8 0 8 80.579 74.600 2.618 4.073 o
-8 0 9 34.714 38.831 2.551 8.664 o
-8 1 1 330.399 327.226 9.070 0.564 o
-8 1 2 0.938 0.709 0.850 212.593 o
-8 1 3 46.665 51.302 2.976 6.304 o
-8 1 4 51.342 51.585 3.118 5.837 o
-8 1 5 13.590 13.628 0.909 28.288 o
-8 1 6 14.757 14.455 1.330 24.087 o
-8 1 7 72.677 77.937 2.622 4.311 o
-8 1 8 11.265 14.754 1.597 25.642 o
-8 1 9 55.902 67.549 2.618 5.387 o
-8 2 1 182.904 180.406 5.952 1.305 o
-8 2 2 127.732 122.444 4.818 2.088 o
-8 2 3 118.807 105.580 4.535 2.357 o
-8 2 4 78.243 70.150 3.685 3.832 o
-8 2 5 32.222 29.930 1.036 12.156 o
-8 2 6 0.326 0.327 0.518 568.092 o
-8 2 7 79.521 94.048 4.889 3.036 o
-8 2 8 71.208 75.492 2.543 4.452 o
-8 2 9 24.457 28.933 4.322 7.450 o
-8 3 1 82.001 81.771 3.685 3.545 o
-8 3 2 0.013 0.850 0.850 294.027 o
-8 3 3 44.767 35.855 2.693 7.454 o
-8 3 4 1.699 3.543 1.417 77.491 o
-8 3 5 151.844 140.017 5.810 1.644 o
-8 3 6 23.476 27.409 2.409 12.123 o
-8 3 7 1.417 2.551 0.850 146.024 o
-8 3 8 86.508 107.933 3.146 3.243 o
-8 4 1 1.990 2.784 0.850 126.441 o
-8 4 2 0.009 -0.142 0.850 363.955 o
-8 4 3 28.112 24.517 2.267 11.689 o
-8 4 4 39.546 36.280 2.834 7.828 o
-8 4 5 11.100 13.605 2.409 19.962 o
-8 4 6 6.660 8.220 0.789 52.450 o
-8 4 7 1.184 1.488 0.645 221.441 o
-8 4 8 1.860 4.516 0.943 103.377 o
-8 5 1 9.081 11.820 1.450 31.850 o
-8 5 2 28.206 32.170 2.551 10.242 o
-8 5 3 2.264 3.968 1.559 63.697 o
-8 5 4 23.728 25.651 3.118 10.394 o
-8 5 5 11.130 9.070 2.126 24.030 o
-8 5 6 0.102 -0.283 1.275 158.564 o
-8 6 1 25.948 27.777 2.409 11.478 o
-8 6 2 5.298 4.609 1.102 61.277 o
-8 6 3 41.167 44.074 3.260 6.762 o
-8 6 4 0.180 -0.425 1.134 194.775 o
-7 -11 1 36.688 30.186 2.551 8.999 o
-7 -10 1 311.655 301.651 6.411 0.675 o
-7 -10 2 1.647 4.677 1.559 65.388 o
-7 -10 3 10.626 20.407 2.834 15.797 o
-7 -9 1 26.519 23.136 1.140 14.919 o
-7 -9 2 2.542 4.821 0.843 97.219 o
-7 -9 3 6.834 8.645 1.842 33.160 o
-7 -9 4 7.518 10.033 1.328 38.197 o
-7 -9 5 5.404 6.839 1.226 51.759 o
-7 -8 1 12.847 15.194 1.111 27.057 o
-7 -8 2 11.652 14.340 1.171 28.714 o
-7 -8 3 14.765 15.535 1.624 21.880 o
-7 -8 4 0.292 0.283 0.992 228.248 o
-7 -8 5 1.006 0.539 0.747 246.839 o
-7 -8 6 0.061 1.050 1.417 117.826 o
-7 -7 1 337.498 312.909 7.216 0.603 o
-7 -7 2 31.196 33.062 1.227 11.782 o
-7 -7 3 1.702 1.814 0.583 189.674 o
-7 -7 4 149.914 131.199 2.864 2.025 o
-7 -7 5 22.561 25.323 2.055 13.676 o
-7 -7 6 92.719 80.315 2.643 3.574 o
-7 -7 7 33.587 42.242 1.937 9.429 o
-7 -6 1 273.365 244.881 4.053 0.893 o
-7 -6 2 468.372 430.711 6.506 0.391 o
-7 -6 3 2.514 4.339 0.706 110.282 o
-7 -6 4 109.046 100.130 2.399 2.965 o
-7 -6 5 26.780 22.398 1.171 14.900 o
-7 -6 6 167.340 166.362 5.740 1.453 o
-7 -6 7 76.768 70.202 2.499 4.346 o
-7 -6 8 0.570 0.400 0.847 257.202 o
-7 -5 1 27.215 36.447 1.130 12.515 o
-7 -5 2 17.724 19.451 0.893 21.308 o
-7 -5 3 4.658 2.739 0.561 95.621 o
-7 -5 4 12.361 14.111 1.116 28.310 o
-7 -5 5 123.512 108.003 2.534 2.592 o
-7 -5 6 15.754 19.478 1.432 20.663 o
-7 -5 7 0.437 1.109 0.847 236.658 o
-7 -5 8 47.540 42.494 1.952 7.533 o
-7 -5 9 19.391 29.052 3.118 10.910 o
-7 -4 1 41.995 38.236 1.309 9.070 o
-7 -4 2 184.728 172.433 3.080 1.512 o
-7 -4 3 28.327 24.228 1.021 14.251 o
-7 -4 4 17.581 21.346 1.457 18.762 o
-7 -4 5 3.075 5.166 0.810 89.485 o
-7 -4 6 0.558 0.202 0.561 456.104 o
-7 -4 7 43.247 40.014 1.852 8.281 o
-7 -4 8 37.181 34.333 1.804 9.661 o
-7 -4 9 0.667 0.921 0.902 208.636 o
-7 -3 1 39.768 39.615 1.855 8.779 o
-7 -3 2 7.304 8.073 1.488 38.483 o
-7 -3 3 0.007 -0.087 0.375 1841.670 o
-7 -3 4 7.131 7.299 0.840 51.571 o
-7 -3 5 45.424 36.407 1.375 8.646 o
-7 -3 6 35.677 30.872 1.408 10.776 o
-7 -3 7 9.687 13.203 1.275 31.563 o
-7 -3 8 17.606 18.301 1.852 17.945 o
-7 -3 9 0.008 -0.094 0.747 471.600 o
-7 -3 10 1.168 2.976 1.102 115.571 o
-7 -2 1 24.586 29.194 1.842 13.010 o
-7 -2 2 288.531 296.481 4.177 0.778 o
-7 -2 3 28.680 24.718 1.123 13.878 o
-7 -2 4 21.082 21.589 1.153 17.718 o
-7 -2 5 15.248 16.159 2.834 14.832 o
-7 -2 6 14.818 21.566 1.734 19.157 o
-7 -2 7 240.235 251.018 4.612 0.975 o
-7 -2 8 241.717 251.474 7.724 0.850 o
-7 -2 9 28.813 32.535 1.752 11.622 o
-7 -2 10 12.213 23.111 2.153 18.083 o
-7 -1 1 18.060 16.864 1.842 18.133 o
-7 -1 2 289.860 297.465 8.361 0.671 o
-7 -1 3 0.065 0.283 0.638 539.797 o
-7 -1 4 253.713 237.816 4.760 0.947 o
-7 -1 5 241.225 230.775 4.861 0.998 o
-7 -1 6 9.489 9.920 1.190 35.808 o
-7 -1 7 692.649 658.602 13.959 0.188 o
-7 -1 8 358.584 358.283 7.223 0.539 o
-7 -1 9 42.559 41.948 2.693 7.367 o
-7 -1 10 13.190 20.142 2.763 15.195 o
-7 0 1 182.292 176.580 5.527 1.352 o
-7 0 2 241.421 226.181 6.802 0.926 o
-7 0 3 667.373 663.680 12.121 0.201 o
-7 0 4 11.227 10.495 1.049 33.343 o
-7 0 5 1.688 2.840 0.680 153.772 o
-7 0 6 96.462 97.588 4.039 2.908 o
-7 0 7 24.299 27.684 2.267 12.247 o
-7 0 8 176.990 175.971 4.355 1.473 o
-7 0 9 83.849 83.897 3.685 3.465 o
-7 0 10 0.415 0.850 1.417 112.698 o
-7 1 1 393.684 373.000 9.778 0.450 o
-7 1 2 3.563 4.677 1.134 71.777 o
-7 1 3 710.315 669.048 16.581 0.172 o
-7 1 4 551.719 516.206 13.605 0.260 o
-7 1 5 5.715 6.859 0.943 57.114 o
-7 1 6 148.238 138.871 3.401 1.951 o
-7 1 7 12.902 17.915 1.566 22.782 o
-7 1 8 5.109 7.270 1.179 53.273 o
-7 1 9 144.809 148.140 3.984 1.879 o
-7 1 10 69.364 69.867 3.401 4.275 o
-7 2 1 120.515 128.113 4.535 2.186 o
-7 2 2 139.903 136.899 4.960 1.865 o
-7 2 3 42.922 44.783 2.693 7.188 o
-7 2 4 58.522 61.974 1.695 5.874 o
-7 2 5 10.541 12.170 1.094 32.678 o
-7 2 6 0.023 0.283 0.472 916.585 o
-7 2 7 1.657 2.551 0.813 143.248 o
-7 2 8 0.391 0.587 0.680 358.145 o
-7 2 9 9.973 12.070 1.494 29.838 o
-7 2 10 93.784 109.406 4.393 2.756 o
-7 3 1 94.296 94.375 3.543 3.117 o
-7 3 2 0.346 0.142 0.709 394.861 o
-7 3 3 23.968 23.100 1.984 13.784 o
-7 3 4 0.222 0.425 0.992 228.144 o
-7 3 5 0.543 0.567 0.472 476.216 o
-7 3 6 7.166 9.296 1.073 44.020 o
-7 3 7 0.003 0.436 1.063 217.006 o
-7 3 8 3.660 5.559 1.049 71.081 o
-7 3 9 0.843 1.742 0.847 187.636 o
-7 3 10 0.025 0.992 1.134 176.878 o
-7 4 1 63.868 63.244 2.205 5.261 o
-7 4 2 13.439 17.187 2.409 17.589 o
-7 4 3 6.616 7.653 1.701 36.863 o
-7 4 4 70.989 60.513 3.401 4.396 o
-7 4 5 7.620 8.023 1.417 38.958 o
-7 4 6 32.985 31.537 1.349 11.375 o
-7 4 7 20.140 18.155 1.984 16.186 o
-7 4 8 22.162 20.016 1.394 16.873 o
-7 4 9 33.296 42.432 1.966 9.423 o
-7 4 10 108.387 118.192 4.535 2.415 o
-7 5 1 0.049 0.000 0.501 976.213 o
-7 5 2 3.079 3.965 0.948 89.544 o
-7 5 3 7.235 9.624 1.350 39.022 o
-7 5 4 66.598 56.687 3.401 4.666 o
-7 5 5 14.538 9.376 2.055 21.613 o
-7 5 6 23.760 19.651 5.456 5.991 o
-7 5 7 0.808 0.331 0.507 407.331 o
-7 5 8 33.483 33.035 2.055 10.076 o
-7 5 9 55.979 64.447 2.438 5.580 o
-7 6 1 1.970 1.540 0.747 158.870 o
-7 6 2 0.026 -0.071 0.601 710.854 o
-7 6 3 0.298 -0.638 0.601 549.145 o
-7 6 4 32.972 30.611 2.693 9.295 o
-7 6 5 29.516 29.052 3.543 8.329 o
-7 6 6 22.361 18.050 2.763 12.586 o
-7 6 7 2.145 4.152 0.857 108.164 o
-7 6 8 18.317 20.095 2.763 13.452 o
-7 7 1 79.463 76.112 2.706 4.057 o
-7 7 2 176.968 171.557 4.559 1.473 o
-7 7 3 4.018 2.238 0.948 88.615 o
-7 7 4 42.591 42.092 2.205 7.880 o
-7 7 5 0.061 0.142 1.275 157.442 o
-7 7 6 8.343 10.603 1.559 32.817 o
-6 -11 1 11.674 12.034 1.392 28.463 o
-6 -11 2 3.868 5.774 2.055 37.923 o
-6 -11 3 56.457 57.875 2.247 5.878 o
-6 -10 1 5.568 5.613 0.987 60.172 o
-6 -10 2 10.826 12.027 1.360 29.921 o
-6 -10 3 0.526 2.126 1.275 116.634 o
-6 -10 4 43.936 43.950 1.906 7.900 o
-6 -9 1 19.939 19.289 0.846 19.912 o
-6 -9 2 0.151 0.246 0.541 655.976 o
-6 -9 3 4.444 7.899 1.771 40.274 o
-6 -9 4 1.221 1.027 0.783 201.403 o
-6 -9 5 0.071 -0.142 0.707 499.829 o
-6 -9 6 0.173 1.071 0.885 247.367 o
-6 -8 1 94.811 81.994 2.017 3.630 o
-6 -8 2 2.071 3.096 0.736 131.745 o
-6 -8 3 26.827 24.036 0.933 14.985 o
-6 -8 4 0.277 -0.272 0.577 595.863 o
-6 -8 5 25.997 23.740 1.545 14.133 o
-6 -8 6 4.837 6.701 1.488 47.588 o
-6 -8 7 1.546 4.191 2.976 25.597 o
-6 -7 1 210.503 202.020 3.518 1.246 o
-6 -7 2 11.456 13.546 0.900 31.506 o
-6 -7 3 16.750 15.507 1.207 22.471 o
-6 -7 4 183.207 183.415 2.951 1.491 o
-6 -7 5 0.627 -0.076 0.646 395.301 o
-6 -7 6 367.496 367.341 7.096 0.523 o
-6 -7 7 130.383 127.565 3.430 2.225 o
-6 -7 8 0.472 0.458 0.847 264.373 o
-6 -6 1 7.584 14.610 0.952 37.444 o
-6 -6 2 29.508 25.665 1.105 13.478 o
-6 -6 3 1.639 27.938 1.350 31.922 o
-6 -6 4 44.205 45.228 1.239 8.308 o
-6 -6 5 110.290 102.617 2.033 2.965 o
-6 -6 6 182.507 171.801 4.050 1.471 o
-6 -6 7 53.491 44.802 1.937 6.835 o
-6 -6 8 19.192 23.758 6.094 5.250 o
-6 -6 9 4.786 8.668 1.350 47.625 o
-6 -5 1 38.127 33.882 1.350 10.058 o
-6 -5 2 67.662 61.010 1.550 5.366 o
-6 -5 3 0.381 0.392 0.323 786.326 o
-6 -5 4 16.965 15.075 0.973 23.490 o
-6 -5 5 78.721 67.591 1.588 4.599 o
-6 -5 6 2.144 1.405 0.597 175.549 o
-6 -5 7 70.287 59.272 3.614 4.341 o
-6 -5 8 42.615 40.687 1.836 8.335 o
-6 -5 9 1.163 3.043 0.948 133.314 o
-6 -4 1 44.027 51.490 1.714 7.614 o
-6 -4 2 36.079 30.779 2.267 9.489 o
-6 -4 3 26.207 23.072 0.846 15.570 o
-6 -4 4 2.501 4.007 0.575 122.587 o
-6 -4 5 39.632 40.116 1.198 9.387 o
-6 -4 6 67.271 64.910 1.617 5.251 o
-6 -4 7 1.896 0.964 0.747 174.236 o
-6 -4 8 80.880 72.028 2.454 4.163 o
-6 -4 9 1.011 1.584 1.063 142.401 o
-6 -4 10 32.650 29.684 1.695 11.158 o
-6 -3 1 462.329 460.764 6.176 0.386 o
-6 -3 2 190.138 178.366 3.904 1.410 o
-6 -3 3 19.411 23.144 1.630 16.685 o
-6 -3 4 28.443 27.299 0.917 13.827 o
-6 -3 5 68.302 65.073 1.520 5.219 o
-6 -3 6 6.710 8.323 0.821 51.497 o
-6 -3 7 18.634 21.383 1.282 18.763 o
-6 -3 8 0.012 0.567 0.701 432.774 o
-6 -3 9 0.029 -0.071 0.701 524.914 o
-6 -3 10 9.110 14.856 1.651 27.590 o
-6 -3 11 0.003 -0.614 0.747 473.287 o
-6 -2 1 553.749 553.745 8.876 0.280 o
-6 -2 2 225.502 246.638 3.661 1.069 o
-6 -2 3 322.853 339.838 9.212 0.563 o
-6 -2 4 188.056 176.880 3.834 1.432 o
-6 -2 5 0.931 0.469 0.458 388.972 o
-6 -2 6 214.462 211.482 3.807 1.191 o
-6 -2 7 31.421 34.276 1.194 11.618 o
-6 -2 8 3.303 1.742 0.847 109.751 o
-6 -2 9 24.155 22.186 1.795 14.412 o
-6 -2 10 0.083 -0.496 0.701 503.456 o
-6 -2 11 5.611 6.024 1.203 53.213 o
-6 -1 1 79.335 79.645 3.118 3.858 o
-6 -1 2 409.495 367.698 7.157 0.472 o
-6 -1 3 7.726 9.667 0.746 46.175 o
-6 -1 4 73.328 71.709 3.260 4.152 o
-6 -1 5 914.748 874.442 14.359 0.123 o
-6 -1 6 164.180 169.397 3.220 1.673 o
-6 -1 7 56.739 61.896 1.811 5.950 o
-6 -1 8 680.681 697.023 10.023 0.199 o
-6 -1 9 436.610 445.647 8.410 0.394 o
-6 -1 10 0.235 1.642 0.847 231.303 o
-6 -1 11 16.444 20.191 1.952 17.604 o
-6 0 2 148.751 151.727 3.461 1.874 o
-6 0 3 1226.660 1172.710 14.817 0.076 o
-6 0 4 250.458 232.474 19.061 0.431 o
-6 0 5 744.323 703.984 11.793 0.176 o
-6 0 6 481.059 465.691 8.474 0.352 o
-6 0 7 229.304 224.352 4.034 1.087 o
-6 0 8 63.842 60.627 1.831 5.507 o
-6 0 9 21.262 24.935 1.974 14.425 o
-6 0 10 24.906 25.129 1.974 13.195 o
-6 0 11 34.813 35.493 1.896 9.849 o
-6 0 12 6.603 11.755 1.551 35.063 o
-6 1 2 65.620 65.757 2.834 4.800 o
-6 1 3 152.489 156.677 3.164 1.839 o
-6 1 4 252.886 236.808 4.595 0.957 o
-6 1 5 39.670 34.722 1.389 9.666 o
-6 1 6 350.611 337.485 6.456 0.577 o
-6 1 7 220.025 211.881 4.696 1.126 o
-6 1 8 334.132 336.244 5.586 0.619 o
-6 1 9 121.158 116.462 2.769 2.530 o
-6 1 10 15.100 22.818 1.984 17.474 o
-6 1 11 9.002 16.158 4.181 10.764 o
-6 1 12 14.865 21.248 2.139 17.261 o
-6 2 2 8.820 8.503 1.417 35.764 o
-6 2 3 0.577 2.229 0.283 346.836 o
-6 2 4 22.576 23.230 0.966 16.977 o
-6 2 5 17.953 16.420 2.197 16.664 o
-6 2 6 0.345 0.502 0.496 544.173 o
-6 2 7 28.137 26.695 1.389 13.268 o
-6 2 8 141.640 149.336 3.780 1.927 o
-6 2 9 58.650 64.285 1.976 5.657 o
-6 2 10 1.454 1.054 0.783 187.189 o
-6 2 11 7.808 10.728 1.450 35.109 o
-6 2 12 4.560 5.825 1.303 55.745 o
-6 3 1 0.840 1.842 0.601 246.757 o
-6 3 2 1.925 2.622 0.701 146.836 o
-6 3 3 11.480 18.990 1.701 22.675 o
-6 3 4 0.909 6.277 3.118 23.279 o
-6 3 5 2.318 2.379 0.619 146.664 o
-6 3 6 17.708 20.909 1.346 19.241 o
-6 3 7 1.837 2.409 0.779 143.924 o
-6 3 8 102.579 102.167 2.927 2.988 o
-6 3 9 74.454 64.600 4.322 3.758 o
-6 3 10 5.451 4.264 1.049 63.080 o
-6 3 11 42.229 44.135 3.118 6.825 o
-6 3 12 55.989 62.619 2.582 5.553 o
-6 4 1 41.638 43.775 1.651 8.430 o
-6 4 2 10.983 15.597 1.630 25.240 o
-6 4 3 76.189 64.617 2.253 4.579 o
-6 4 4 11.873 8.603 2.055 24.203 o
-6 4 5 251.490 226.986 4.596 0.978 o
-6 4 6 6.805 5.187 0.992 54.750 o
-6 4 7 1.652 1.296 0.619 201.502 o
-6 4 8 8.758 11.010 1.701 30.113 o
-6 4 9 2.107 3.568 0.992 103.302 o
-6 4 10 5.564 8.220 1.559 41.378 o
-6 4 11 4.329 5.863 1.257 58.255 o
-6 5 1 135.612 133.345 3.356 2.131 o
-6 5 2 68.740 67.814 2.305 4.836 o
-6 5 3 22.674 20.713 1.913 14.875 o
-6 5 4 91.151 80.587 1.949 3.781 o
-6 5 5 251.640 218.345 4.452 0.998 o
-6 5 6 32.047 21.948 2.551 10.483 o
-6 5 7 24.247 25.745 4.818 6.746 o
-6 5 8 33.445 30.916 1.913 10.511 o
-6 5 9 22.947 29.009 3.472 9.381 o
-6 5 10 25.477 24.659 1.984 13.069 o
-6 5 11 0.349 -0.425 0.992 235.148 o
-6 6 1 67.488 73.148 2.405 4.727 o
-6 6 2 68.836 59.857 3.543 4.425 o
-6 6 3 10.543 15.565 1.551 26.366 o
-6 6 4 132.139 118.375 2.217 2.404 o
-6 6 5 19.229 14.332 3.614 10.925 o
-6 6 6 15.586 30.630 3.189 11.338 o
-6 6 7 40.364 34.498 2.551 8.207 o
-6 6 8 17.962 15.120 1.458 20.520 o
-6 6 9 27.006 30.244 6.802 4.095 o
-6 6 10 0.771 0.283 0.992 195.638 o
-6 7 1 7.512 7.655 1.102 45.031 o
-6 7 2 37.120 36.718 3.472 7.201 o
-6 7 3 82.860 86.426 2.955 3.691 o
-6 7 4 60.804 60.794 4.818 3.990 o
-6 7 5 26.514 23.061 3.517 9.191 o
-6 7 6 6.971 9.176 1.112 44.184 o
-6 7 7 7.306 7.607 1.094 45.934 o
-6 7 8 7.347 7.129 1.153 45.533 o
-6 7 9 2.399 1.913 1.913 52.703 o
-6 8 1 2.880 1.692 0.847 118.760 o
-6 8 2 21.096 19.684 1.852 15.928 o
-6 8 3 16.361 21.216 1.997 17.185 o
-6 8 4 2.407 4.479 1.102 85.325 o
-6 8 5 137.924 125.029 2.528 2.243 o
-6 8 6 2.581 -0.035 0.463 210.427 o
-6 8 7 4.251 4.797 0.992 71.642 o
-6 8 8 0.841 1.543 0.837 195.758 o
-5 -12 1 4.067 7.625 1.263 54.984 o
-5 -11 1 11.588 17.036 1.644 23.835 o
-5 -11 2 0.128 0.191 0.501 776.546 o
-5 -11 3 79.074 78.778 1.975 4.243 o
-5 -10 1 6.522 7.580 1.049 49.646 o
-5 -10 2 32.634 34.437 1.566 10.836 o
-5 -10 3 84.023 76.621 2.452 3.964 o
-5 -10 4 59.417 61.267 2.213 5.586 o
-5 -10 5 44.694 47.017 1.443 7.994 o
-5 -9 1 54.729 57.221 1.351 6.502 o
-5 -9 2 335.243 324.000 6.234 0.616 o
-5 -9 3 50.213 55.468 1.974 6.626 o
-5 -9 4 0.104 -0.044 0.646 576.371 o
-5 -9 5 4.683 6.463 1.153 57.999 o
-5 -9 6 40.496 44.837 1.906 8.271 o
-5 -8 1 272.047 262.606 3.677 0.879 o
-5 -8 2 47.521 44.275 1.161 7.993 o
-5 -8 3 170.103 162.198 3.671 1.622 o
-5 -8 4 2.939 2.371 0.747 118.656 o
-5 -8 5 5.415 4.231 0.885 68.606 o
-5 -8 6 95.618 90.489 2.656 3.350 o
-5 -8 7 0.263 1.077 0.707 321.289 o
-5 -7 1 8.022 9.657 0.703 45.694 o
-5 -7 2 2.222 4.317 0.528 128.725 o
-5 -7 3 0.385 1.001 0.534 412.010 o
-5 -7 4 25.786 25.226 0.917 15.188 o
-5 -7 5 59.360 59.254 2.055 5.738 o
-5 -7 6 0.012 -0.142 0.577 784.319 o
-5 -7 7 101.649 104.609 2.961 2.975 o
-5 -7 8 14.030 20.929 4.322 9.122 o
-5 -6 1 47.125 48.609 0.960 7.879 o
-5 -6 2 93.868 88.803 1.454 3.652 o
-5 -6 3 0.113 1.611 0.979 198.993 o
-5 -6 4 27.070 23.515 0.743 15.267 o
-5 -6 5 30.770 25.454 0.933 13.348 o
-5 -6 6 29.358 24.167 1.057 13.846 o
-5 -6 7 30.558 31.129 1.269 12.137 o
-5 -6 8 0.294 0.486 0.680 389.696 o
-5 -6 9 19.042 16.864 1.559 18.815 o
-5 -5 1 53.874 61.252 0.979 6.542 o
-5 -5 2 96.250 99.605 1.409 3.429 o
-5 -5 3 130.329 134.109 1.816 2.348 o
-5 -5 4 8.857 11.215 1.051 37.355 o
-5 -5 5 32.671 34.058 0.924 11.633 o
-5 -5 6 197.628 188.432 3.595 1.351 o
-5 -5 7 1.528 3.179 0.655 156.553 o
-5 -5 8 11.336 15.703 1.227 27.828 o
-5 -5 9 23.219 25.113 4.039 8.348 o
-5 -5 10 17.360 20.974 1.842 17.415 o
-5 -4 1 9.468 11.790 0.421 40.468 o
-5 -4 2 1.795 3.329 1.330 83.482 o
-5 -4 3 5.497 4.809 0.389 78.339 o
-5 -4 4 1.758 2.644 0.328 195.472 o
-5 -4 5 98.259 100.500 1.669 3.328 o
-5 -4 6 276.455 284.369 3.583 0.837 o
-5 -4 7 23.095 24.602 1.089 16.146 o
-5 -4 8 0.764 0.354 0.458 448.963 o
-5 -4 9 31.456 24.957 1.198 12.848 o
-5 -4 10 0.030 -1.063 0.701 524.563 o
-5 -4 11 54.304 54.561 2.834 5.755 o
-5 -3 1 41.552 35.026 0.668 9.840 o
-5 -3 2 6.658 6.974 0.336 61.930 o
-5 -3 3 49.082 55.831 1.025 7.232 o
-5 -3 4 0.020 -0.071 0.168 7253.320 o
-5 -3 5 9.224 13.387 0.676 37.509 o
-5 -3 6 48.177 47.626 1.110 7.742 o
-5 -3 7 235.309 243.570 3.238 1.049 o
-5 -3 8 105.054 111.125 2.455 2.924 o
-5 -3 9 19.798 20.492 1.690 16.921 o
-5 -3 10 154.014 154.995 3.849 1.773 o
-5 -3 11 0.037 0.659 0.847 305.538 o
-5 -2 1 904.602 969.745 11.462 0.122 o
-5 -2 2 279.617 286.374 9.061 0.679 o
-5 -2 3 11.263 13.754 0.477 34.024 o
-5 -2 4 103.489 90.430 1.985 3.275 o
-5 -2 5 84.968 82.436 1.408 4.071 o
-5 -2 6 178.703 177.881 2.487 1.566 o
-5 -2 7 205.379 210.676 2.905 1.274 o
-5 -2 8 358.978 366.311 5.673 0.555 o
-5 -2 9 177.487 182.007 3.436 1.509 o
-5 -2 10 45.455 52.227 2.622 6.680 o
-5 -2 11 194.902 194.301 4.606 1.295 o
-5 -2 12 46.570 50.735 2.976 6.333 o
-5 -1 1 408.055 414.214 7.139 0.449 o
-5 -1 2 17.138 13.128 0.419 26.091 o
-5 -1 3 385.638 386.647 6.964 0.490 o
-5 -1 4 32.276 30.779 0.722 12.340 o
-5 -1 5 282.919 267.296 2.979 0.853 o
-5 -1 6 790.217 753.894 7.917 0.167 o
-5 -1 7 126.865 128.818 2.760 2.347 o
-5 -1 8 113.111 110.463 2.097 2.817 o
-5 -1 9 347.001 355.962 11.196 0.482 o
-5 -1 10 21.493 25.233 1.904 14.504 o
-5 -1 11 261.969 274.964 5.812 0.834 o
-5 -1 12 116.950 108.389 3.256 2.594 o
-5 0 1 293.271 302.232 3.694 0.768 o
-5 0 2 18.507 15.777 0.440 23.319 o
-5 0 3 27.536 35.239 0.875 12.908 o
-5 0 4 85.636 72.150 1.142 4.291 o
-5 0 5 168.600 176.136 3.810 1.570 o
-5 0 6 39.991 42.179 0.985 9.313 o
-5 0 7 990.904 949.159 10.973 0.112 o
-5 0 8 304.658 304.843 5.029 0.715 o
-5 0 9 33.740 38.343 1.734 10.005 o
-5 0 10 41.501 40.055 1.913 8.447 o
-5 0 11 4.186 5.107 1.149 65.059 o
-5 0 12 2.020 3.516 1.049 100.570 o
-5 1 1 115.079 133.241 1.882 2.593 o
-5 1 2 12.588 16.061 0.477 29.905 o
-5 1 3 194.229 229.544 2.680 1.291 o
-5 1 4 9.210 10.963 1.057 36.786 o
-5 1 5 109.224 109.921 2.231 2.883 o
-5 1 6 90.003 87.612 2.980 3.459 o
-5 1 7 694.691 681.260 9.582 0.198 o
-5 1 8 63.906 69.850 1.914 5.195 o
-5 1 9 206.905 207.929 3.926 1.231 o
-5 1 10 3.188 4.346 0.948 85.973 o
-5 1 11 1.833 2.857 0.948 119.220 o
-5 1 12 19.482 24.659 2.052 14.874 o
-5 2 1 1.641 2.135 0.401 210.662 o
-5 2 2 12.958 7.227 0.439 37.426 o
-5 2 3 57.779 75.860 1.283 5.606 o
-5 2 4 111.973 110.398 4.252 2.476 o
-5 2 5 6.918 8.209 0.933 49.024 o
-5 2 6 4.347 5.897 0.685 76.800 o
-5 2 7 41.579 39.969 1.538 8.806 o
-5 2 8 1019.070 1023.460 13.889 0.101 o
-5 2 9 403.858 404.243 6.431 0.466 o
-5 2 10 3.956 5.079 1.020 71.769 o
-5 2 11 34.269 30.361 1.695 10.736 o
-5 2 12 9.606 9.948 1.450 32.534 o
-5 2 13 5.820 7.604 1.350 45.897 o
-5 3 2 48.677 53.008 1.704 7.057 o
-5 3 3 0.448 1.503 0.286 467.831 o
-5 3 4 52.913 48.852 1.842 6.766 o
-5 3 5 19.349 17.856 1.701 17.779 o
-5 3 6 0.497 1.379 0.492 367.273 o
-5 3 7 78.872 82.738 2.064 4.150 o
-5 3 8 285.423 280.590 4.808 0.792 o
-5 3 9 187.117 180.224 4.419 1.391 o
-5 3 10 0.001 -0.044 0.601 731.409 o
-5 3 11 13.621 16.807 1.734 21.614 o
-5 3 12 7.105 6.988 1.257 44.616 o
-5 3 13 21.840 30.647 4.393 7.491 o
-5 4 1 52.116 52.577 2.409 6.288 o
-5 4 2 0.353 0.779 0.501 480.686 o
-5 4 3 2.218 1.992 0.355 185.463 o
-5 4 4 21.866 17.151 1.488 17.438 o
-5 4 5 10.506 12.860 3.047 16.211 o
-5 4 6 143.771 125.357 3.030 2.116 o
-5 4 7 46.668 39.281 1.625 8.092 o
-5 4 8 13.469 12.770 1.146 27.554 o
-5 4 9 44.372 44.668 1.626 8.042 o
-5 4 10 49.061 43.703 1.906 7.344 o
-5 4 11 13.237 19.816 1.873 20.000 o
-5 4 12 0.554 0.825 0.813 251.945 o
-5 5 1 89.385 88.306 2.763 3.524 o
-5 5 2 36.497 34.485 1.503 10.138 o
-5 5 3 76.806 68.731 1.289 4.734 o
-5 5 4 1.425 3.615 0.718 145.068 o
-5 5 5 26.829 34.071 1.309 12.697 o
-5 5 6 11.963 6.489 2.055 25.153 o
-5 5 7 129.193 103.841 2.824 2.494 o
-5 5 8 55.749 53.633 2.622 5.836 o
-5 5 9 1.530 4.600 0.821 118.868 o
-5 5 10 230.911 204.384 4.822 1.090 o
-5 5 11 0.376 0.740 1.134 166.749 o
-5 5 12 8.668 7.566 1.350 38.066 o
-5 6 1 9.208 11.602 1.149 35.132 o
-5 6 2 3.962 5.316 0.847 77.480 o
-5 6 3 42.885 36.749 1.021 9.261 o
-5 6 4 17.193 17.738 0.850 22.559 o
-5 6 5 23.663 21.922 2.148 13.592 o
-5 6 6 54.965 50.228 1.781 6.563 o
-5 6 7 26.617 19.288 2.551 11.968 o
-5 6 8 212.653 182.247 4.358 1.247 o
-5 6 9 1.573 -0.523 0.646 251.589 o
-5 6 10 15.154 19.557 1.701 19.745 o
-5 6 11 23.747 19.286 1.937 14.664 o
-5 6 12 2.373 6.266 1.360 64.692 o
-5 7 1 110.669 103.212 2.955 2.806 o
-5 7 2 25.070 21.514 1.350 15.364 o
-5 7 3 43.199 37.189 1.985 8.338 o
-5 7 4 13.202 12.206 0.893 29.898 o
-5 7 5 422.771 373.864 5.902 0.467 o
-5 7 6 36.376 31.015 1.253 10.795 o
-5 7 7 56.454 42.878 1.913 6.671 o
-5 7 8 2.812 2.037 0.783 122.179 o
-5 7 9 16.194 25.027 3.543 10.695 o
-5 7 10 227.483 229.441 6.944 0.958 o
-5 7 11 0.031 1.275 1.134 170.119 o
-5 8 1 1.464 1.984 1.134 116.128 o
-5 8 2 6.053 5.303 1.049 56.787 o
-5 8 3 14.377 21.321 3.614 11.202 o
-5 8 4 110.112 99.388 2.138 2.989 o
-5 8 5 72.254 57.714 1.621 5.171 o
-5 8 6 1.046 1.709 0.633 226.548 o
-5 8 7 0.000 0.447 0.601 586.234 o
-5 8 8 2.636 6.053 1.073 76.602 o
-5 8 9 83.317 97.927 3.826 3.253 o
-5 8 10 34.255 26.218 2.126 10.459 o
-5 9 1 52.835 64.623 3.685 4.954 o
-5 9 2 1.378 3.289 0.948 124.698 o
-5 9 3 2.858 3.260 1.002 93.650 o
-5 9 4 0.286 0.602 0.463 587.102 o
-5 9 5 5.451 7.744 0.882 57.588 o
-5 9 6 36.436 40.285 1.504 9.627 o
-5 9 7 37.490 33.890 1.475 10.041 o
-5 9 8 2.320 4.265 1.049 91.040 o
-5 10 3 2.082 -0.567 1.134 124.414 o
-5 10 4 1.186 4.133 2.055 47.751 o
-5 10 5 1.666 1.984 1.559 75.469 o
-4 -12 1 2.552 4.641 0.735 105.069 o
-4 -12 2 18.736 23.540 3.210 11.357 o
-4 -11 1 17.879 17.524 1.615 19.075 o
-4 -11 2 112.492 112.338 2.275 2.787 o
-4 -11 3 185.222 182.714 3.190 1.467 o
-4 -11 4 1.158 2.182 0.779 174.470 o
-4 -10 1 243.123 227.131 3.645 1.039 o
-4 -10 2 205.325 210.373 3.440 1.254 o
-4 -10 3 25.493 31.784 1.122 13.763 o
-4 -10 4 106.482 105.918 2.178 2.991 o
-4 -10 5 297.963 286.649 5.084 0.749 o
-4 -9 1 52.389 50.396 1.261 7.069 o
-4 -9 2 1026.060 997.004 13.189 0.103 o
-4 -9 3 271.326 285.443 4.618 0.827 o
-4 -9 4 2.708 3.878 0.661 113.935 o
-4 -9 5 26.434 30.293 0.962 13.940 o
-4 -9 6 99.315 104.827 2.093 3.183 o
-4 -9 7 1.626 1.428 0.904 150.001 o
-4 -8 1 0.404 0.909 0.310 598.023 o
-4 -8 2 1.718 4.819 0.450 141.057 o
-4 -8 3 387.981 383.317 5.091 0.511 o
-4 -8 4 92.399 92.093 1.868 3.579 o
-4 -8 5 45.082 41.924 1.215 8.427 o
-4 -8 6 16.567 20.734 1.961 17.365 o
-4 -8 7 19.946 18.462 1.559 17.851 o
-4 -8 8 92.266 99.579 2.283 3.397 o
-4 -7 1 1.937 1.158 0.274 242.339 o
-4 -7 2 52.260 50.389 0.957 7.212 o
-4 -7 3 82.920 79.310 1.300 4.229 o
-4 -7 4 20.597 21.547 0.814 18.848 o
-4 -7 5 121.766 114.331 2.114 2.617 o
-4 -7 6 0.154 0.362 0.374 962.236 o
-4 -7 7 27.080 30.528 1.247 13.251 o
-4 -7 8 30.652 33.936 1.532 11.382 o
-4 -7 9 21.671 19.924 3.472 10.354 o
-4 -6 1 18.543 19.869 0.520 21.426 o
-4 -6 2 7.427 10.664 0.705 45.981 o
-4 -6 3 171.553 173.148 2.140 1.657 o
-4 -6 4 39.567 33.917 0.795 10.244 o
-4 -6 5 35.380 33.191 1.003 11.028 o
-4 -6 6 54.323 54.431 1.353 6.657 o
-4 -6 7 1.472 1.802 0.481 222.285 o
-4 -6 8 1.465 1.380 0.541 227.467 o
-4 -6 9 33.104 36.214 1.447 10.707 o
-4 -6 10 128.973 123.845 3.401 2.273 o
-4 -5 1 720.186 685.966 6.481 0.197 o
-4 -5 2 12.952 14.009 0.448 31.003 o
-4 -5 3 46.755 49.813 0.987 7.839 o
-4 -5 4 0.276 0.425 0.227 1064.530 o
-4 -5 5 98.254 103.434 1.535 3.308 o
-4 -5 6 122.911 109.853 2.007 2.648 o
-4 -5 7 20.071 18.816 1.473 18.004 o
-4 -5 8 11.292 16.672 1.017 28.678 o
-4 -5 9 6.514 6.387 0.843 56.438 o
-4 -5 10 10.493 18.569 3.330 13.672 o
-4 -5 11 2.523 2.002 0.992 109.724 o
-4 -4 1 1920.570 2089.690 18.740 0.032 o
-4 -4 2 10.366 11.305 0.393 38.938 o
-4 -4 3 135.011 135.271 2.102 2.251 o
-4 -4 4 169.016 192.542 2.481 1.584 o
-4 -4 5 35.419 36.035 0.797 10.876 o
-4 -4 6 104.558 97.974 1.642 3.203 o
-4 -4 7 0.958 0.092 0.332 514.250 o
-4 -4 8 100.529 92.096 1.882 3.347 o
-4 -4 9 165.325 163.121 2.782 1.718 o
-4 -4 10 1.100 2.804 0.698 176.593 o
-4 -4 11 16.526 15.457 1.430 21.593 o
-4 -3 1 21.974 30.826 0.548 16.120 o
-4 -3 2 906.254 966.553 8.872 0.125 o
-4 -3 3 343.933 376.780 3.823 0.592 o
-4 -3 4 88.054 95.897 1.376 3.735 o
-4 -3 5 85.075 94.939 2.110 3.711 o
-4 -3 6 77.350 77.472 1.269 4.509 o
-4 -3 7 24.464 31.764 0.911 14.450 o
-4 -3 8 36.578 38.809 1.130 10.096 o
-4 -3 9 47.463 45.972 1.304 7.815 o
-4 -3 10 181.263 179.472 3.467 1.490 o
-4 -3 11 205.308 206.998 3.984 1.239 o
-4 -3 12 1.677 1.833 1.205 105.838 o
-4 -2 1 1204.350 1266.170 14.625 0.074 o
-4 -2 2 418.261 445.767 5.165 0.440 o
-4 -2 3 96.224 97.525 1.397 3.461 o
-4 -2 4 104.832 110.137 2.000 3.007 o
-4 -2 5 17.727 17.060 0.514 23.299 o
-4 -2 6 59.098 64.490 1.132 5.953 o
-4 -2 7 28.559 27.911 0.748 13.889 o
-4 -2 8 151.952 164.888 2.689 1.840 o
-4 -2 9 2.749 4.059 0.783 103.637 o
-4 -2 10 122.445 137.247 2.491 2.380 o
-4 -2 11 589.719 618.791 9.114 0.248 o
-4 -2 12 208.478 195.879 4.479 1.227 o
-4 -1 1 146.304 131.478 1.549 2.163 o
-4 -1 2 245.146 258.198 4.097 0.962 o
-4 -1 3 23.040 24.584 0.512 17.143 o
-4 -1 4 2.254 1.795 0.274 195.942 o
-4 -1 5 164.820 160.397 1.969 1.780 o
-4 -1 6 9.030 13.759 1.473 30.190 o
-4 -1 7 174.813 177.535 2.262 1.607 o
-4 -1 8 112.702 115.378 1.627 2.829 o
-4 -1 9 43.186 45.182 1.125 8.520 o
-4 -1 10 1.477 1.198 0.415 261.920 o
-4 -1 11 0.693 0.625 0.449 436.441 o
-4 -1 12 3.352 1.984 0.802 110.023 o
-4 -1 13 15.986 22.043 1.795 18.061 o
-4 0 1 6.714 7.760 0.379 58.913 o
-4 0 2 1689.730 1770.940 22.656 0.040 o
-4 0 3 243.107 231.370 2.635 1.057 o
-4 0 4 5.084 9.168 0.588 61.448 o
-4 0 5 92.111 80.660 1.278 3.868 o
-4 0 6 122.117 105.216 1.504 2.755 o
-4 0 7 93.872 85.885 1.653 3.666 o
-4 0 8 114.707 110.834 1.690 2.828 o
-4 0 9 0.319 0.249 0.334 913.209 o
-4 0 10 14.956 20.335 1.068 22.551 o
-4 0 11 44.349 41.100 1.292 8.531 o
-4 0 12 31.963 28.826 1.630 11.521 o
-4 0 13 32.193 27.998 1.603 11.608 o
-4 1 1 3.150 2.542 0.389 136.087 o
-4 1 2 936.147 990.071 9.665 0.118 o
-4 1 3 204.565 254.280 3.326 1.154 o
-4 1 4 32.727 30.468 0.623 12.335 o
-4 1 5 13.627 13.448 0.634 29.709 o
-4 1 6 40.324 39.283 0.822 9.599 o
-4 1 7 241.069 247.585 3.472 1.013 o
-4 1 8 154.628 156.113 2.334 1.880 o
-4 1 9 401.761 406.537 4.454 0.485 o
-4 1 10 272.239 272.108 4.293 0.851 o
-4 1 11 19.988 22.386 1.137 18.144 o
-4 1 12 27.179 25.935 1.470 13.534 o
-4 1 13 9.772 12.689 1.551 29.113 o
-4 2 1 2.407 5.212 0.761 101.198 o
-4 2 2 126.138 141.033 1.570 2.376 o
-4 2 3 150.558 172.061 2.503 1.831 o
-4 2 4 190.789 202.260 2.816 1.386 o
-4 2 5 0.184 2.372 0.271 422.938 o
-4 2 6 3.091 6.481 0.549 91.896 o
-4 2 7 70.369 68.708 1.305 5.062 o
-4 2 8 157.992 145.094 2.021 1.921 o
-4 2 9 221.623 226.756 2.868 1.153 o
-4 2 10 440.790 417.932 6.375 0.422 o
-4 2 11 74.849 74.205 1.983 4.514 o
-4 2 12 12.604 15.763 1.289 25.879 o
-4 2 13 1.127 1.134 1.275 114.481 o
-4 3 1 92.931 106.857 1.850 3.358 o
-4 3 2 16.850 17.811 0.395 23.996 o
-4 3 3 27.530 43.281 0.691 11.964 o
-4 3 4 3.763 6.466 0.679 79.873 o
-4 3 5 5.082 10.304 0.573 58.477 o
-4 3 6 6.498 6.810 0.444 62.173 o
-4 3 7 0.713 0.820 0.315 479.578 o
-4 3 8 68.305 67.747 1.800 5.052 o
-4 3 9 1.857 4.384 0.616 130.964 o
-4 3 10 79.547 74.777 1.954 4.311 o
-4 3 11 74.311 75.444 2.481 4.346 o
-4 3 12 9.220 11.488 1.450 31.895 o
-4 3 13 3.153 4.879 1.149 73.612 o
-4 4 1 62.331 66.637 1.695 5.468 o
-4 4 2 37.098 47.681 0.786 9.454 o
-4 4 3 112.340 123.560 2.210 2.693 o
-4 4 4 4.631 9.561 0.843 57.970 o
-4 4 5 0.000 0.347 0.307 1613.970 o
-4 4 6 35.697 44.519 1.331 9.562 o
-4 4 7 462.849 431.906 8.629 0.377 o
-4 4 8 430.469 431.248 6.595 0.423 o
-4 4 9 22.083 29.229 1.251 15.239 o
-4 4 10 265.844 252.001 5.327 0.870 o
-4 4 11 4.714 4.110 0.987 70.887 o
-4 4 12 242.445 226.618 5.199 0.989 o
-4 4 13 9.899 3.930 1.275 40.658 o
-4 5 1 59.679 51.585 2.409 5.776 o
-4 5 2 32.779 26.278 0.765 12.796 o
-4 5 3 16.029 20.096 0.737 22.896 o
-4 5 4 24.304 22.649 1.250 15.684 o
-4 5 5 29.761 28.764 0.997 13.066 o
-4 5 6 9.922 15.783 1.057 31.034 o
-4 5 7 9.751 4.416 0.667 49.314 o
-4 5 8 611.272 586.213 8.557 0.248 o
-4 5 9 176.321 158.472 3.251 1.617 o
-4 5 10 90.513 79.024 2.519 3.692 o
-4 5 11 38.076 36.315 3.330 7.319 o
-4 5 12 0.626 2.079 0.885 181.694 o
-4 5 13 220.794 222.064 5.286 1.075 o
-4 6 1 52.907 56.970 2.693 5.868 o
-4 6 2 326.670 321.991 5.114 0.653 o
-4 6 3 303.414 302.929 4.627 0.727 o
-4 6 4 109.478 90.546 1.957 3.131 o
-4 6 5 1.790 -0.283 0.363 309.897 o
-4 6 6 1.606 1.816 0.525 204.765 o
-4 6 7 46.025 38.024 1.374 8.452 o
-4 6 8 155.201 138.413 2.959 1.920 o
-4 6 9 0.577 1.483 0.817 220.492 o
-4 6 10 11.043 13.133 1.494 27.696 o
-4 6 11 11.165 9.427 1.360 31.378 o
-4 6 12 3.139 2.989 1.049 88.777 o
-4 6 13 22.091 35.429 3.685 8.587 o
-4 7 1 38.965 34.862 2.267 8.739 o
-4 7 2 42.033 36.453 1.112 9.360 o
-4 7 3 34.160 36.575 1.968 9.768 o
-4 7 4 215.897 185.154 3.316 1.270 o
-4 7 5 148.319 130.791 3.370 1.997 o
-4 7 6 35.482 31.205 1.220 11.004 o
-4 7 7 1.392 1.036 0.646 222.699 o
-4 7 8 2.685 2.454 0.783 120.346 o
-4 7 9 26.321 28.786 1.532 13.229 o
-4 7 10 5.981 7.700 1.226 47.832 o
-4 7 11 16.981 21.040 1.937 17.183 o
-4 7 12 29.073 38.309 2.206 10.154 o
-4 8 1 1.012 1.417 0.992 157.595 o
-4 8 2 12.085 15.516 2.409 18.776 o
-4 8 3 1.040 0.861 0.604 276.264 o
-4 8 4 62.705 61.228 1.633 5.641 o
-4 8 5 16.600 16.653 1.586 20.319 o
-4 8 6 2.062 1.942 0.583 168.838 o
-4 8 7 3.132 3.558 0.751 103.437 o
-4 8 8 17.553 17.110 1.771 18.678 o
-4 8 9 2.439 3.543 1.134 88.400 o
-4 8 10 0.576 -0.595 0.707 361.109 o
-4 8 11 0.244 4.453 1.123 117.032 o
-4 9 1 18.351 20.832 2.693 13.595 o
-4 9 2 0.088 -0.189 0.273 2412.510 o
-4 9 3 36.522 32.250 1.102 10.789 o
-4 9 4 19.081 14.746 1.969 17.571 o
-4 9 5 7.554 9.224 0.940 44.905 o
-4 9 6 0.853 2.256 1.033 141.713 o
-4 9 7 0.632 0.487 0.544 407.929 o
-4 9 8 12.110 13.813 1.520 25.839 o
-4 9 9 93.545 112.949 4.252 2.763 o
-4 9 10 23.748 20.407 2.409 13.002 o
-4 10 1 87.814 96.935 4.677 2.908 o
-4 10 2 0.003 -0.992 0.850 365.109 o
-4 10 3 5.855 8.882 0.779 54.778 o
-4 10 4 36.051 30.426 1.193 10.995 o
-4 10 5 155.076 157.688 3.245 1.803 o
-4 10 6 13.785 17.969 2.011 19.450 o
-4 10 7 22.382 28.667 4.133 8.044 o
-4 10 8 15.426 22.675 2.409 15.452 o
-4 10 9 36.083 35.855 2.409 8.886 o
-3 -12 1 0.805 0.142 0.544 407.534 o
-3 -12 2 0.078 -0.794 0.472 1042.010 o
-3 -11 1 18.618 19.540 1.268 19.387 o
-3 -11 2 13.921 15.955 1.857 20.956 o
-3 -11 3 9.247 9.832 1.249 35.705 o
-3 -11 4 204.567 200.388 3.256 1.293 o
-3 -10 1 81.127 87.877 1.503 4.095 o
-3 -10 2 93.666 86.567 1.511 3.685 o
-3 -10 3 58.708 57.092 1.293 6.207 o
-3 -10 4 60.073 58.300 1.313 6.049 o
-3 -10 5 225.427 230.737 3.320 1.114 o
-3 -10 6 41.807 39.161 1.125 9.169 o
-3 -9 1 0.009 0.525 0.307 1300.660 o
-3 -9 2 236.702 237.958 2.978 1.061 o
-3 -9 3 179.025 169.739 2.327 1.602 o
-3 -9 4 0.835 1.467 0.388 337.819 o
-3 -9 5 251.255 243.528 3.518 0.982 o
-3 -9 6 15.965 16.435 1.309 22.251 o
-3 -9 7 3.824 7.813 0.675 73.282 o
-3 -8 1 0.666 0.998 0.232 505.086 o
-3 -8 2 162.363 167.976 2.229 1.755 o
-3 -8 3 439.300 430.419 4.762 0.430 o
-3 -8 4 15.078 14.230 1.055 25.397 o
-3 -8 5 34.466 35.680 0.969 10.986 o
-3 -8 6 8.231 11.055 0.839 41.448 o
-3 -8 7 7.864 7.561 0.665 50.592 o
-3 -8 8 0.504 0.678 0.412 519.170 o
-3 -7 1 242.483 236.245 2.649 1.049 o
-3 -7 2 267.984 276.752 3.711 0.869 o
-3 -7 3 139.640 134.216 2.966 2.119 o
-3 -7 4 52.870 44.051 1.128 7.408 o
-3 -7 5 195.110 186.511 2.871 1.405 o
-3 -7 6 9.225 10.917 0.895 38.492 o
-3 -7 7 0.012 0.101 0.404 1403.380 o
-3 -7 8 6.473 8.390 2.299 27.370 o
-3 -7 9 310.719 320.443 4.248 0.700 o
-3 -6 1 24.388 24.917 0.781 16.060 o
-3 -6 2 21.640 21.693 0.684 18.443 o
-3 -6 3 21.983 29.604 0.828 16.013 o
-3 -6 4 0.399 -0.054 0.201 1316.470 o
-3 -6 5 111.480 114.642 1.999 2.820 o
-3 -6 6 20.919 22.395 0.828 18.377 o
-3 -6 7 2.963 3.341 0.561 120.537 o
-3 -6 8 1.489 1.619 0.549 215.177 o
-3 -6 9 52.935 51.741 1.556 6.802 o
-3 -6 10 178.571 178.706 2.660 1.555 o
-3 -5 1 1000.420 1001.890 11.147 0.107 o
-3 -5 2 31.453 25.940 0.781 13.232 o
-3 -5 3 130.230 151.526 2.234 2.195 o
-3 -5 4 92.882 100.110 1.400 3.519 o
-3 -5 5 21.646 23.252 0.623 18.094 o
-3 -5 6 115.359 121.370 2.055 2.675 o
-3 -5 7 46.898 47.864 1.207 7.826 o
-3 -5 8 19.145 21.111 0.954 19.547 o
-3 -5 9 46.965 51.691 1.712 7.289 o
-3 -5 10 25.608 24.315 1.417 14.461 o
-3 -5 11 0.014 -0.084 0.491 1072.410 o
-3 -4 1 9.299 6.854 0.588 47.342 o
-3 -4 2 80.767 102.416 1.685 3.816 o
-3 -4 3 0.080 0.268 0.186 2198.370 o
-3 -4 4 869.912 918.459 8.525 0.134 o
-3 -4 5 10.061 11.292 0.504 39.133 o
-3 -4 6 205.195 219.428 2.793 1.255 o
-3 -4 7 290.455 304.240 4.095 0.766 o
-3 -4 8 51.338 46.555 1.372 7.313 o
-3 -4 9 0.117 0.236 0.409 1009.950 o
-3 -4 10 88.039 93.430 2.208 3.622 o
-3 -4 11 19.791 20.894 1.075 18.869 o
-3 -4 12 11.362 8.386 1.030 35.263 o
-3 -3 1 159.613 182.164 3.682 1.625 o
-3 -3 2 209.469 214.382 3.553 1.218 o
-3 -3 3 613.481 641.367 6.049 0.244 o
-3 -3 4 542.282 549.187 5.788 0.302 o
-3 -3 5 1.173 2.752 0.313 234.474 o
-3 -3 6 43.584 45.650 0.884 8.566 o
-3 -3 7 78.321 83.940 1.739 4.230 o
-3 -3 8 89.046 93.823 1.780 3.671 o
-3 -3 9 0.631 1.261 0.447 373.471 o
[truncated: 118,851 more chars]
